# Supplementary material for: Promyelocytic Leukemia Protein Promotes Neuroprotection in a mouse model of Alzheimer’s Disease by Modulating the Microglial Inflammatory Response
Source: Research Square preprint supplement (doi:10.21203/rs.3.rs-8584272/v1), 2026-01-20
Supplement: Supplementary file 1 [file 66e3874eeba44132138d5d11.xlsx]

## Sheet: Description
Description
The whole trasncriptomic dataset for females and males separately
Differentially expressed genes (DEGs) in either group of the comparison were defined by applying the following thresholds |Log2FC| >0.58 and p-adj <0.05, which was considered statistically significant.

## Sheet: PML KO vs WT_females
baseMean	log2FoldChange	lfcSE	stat	pvalue	padj	GENE
226.5	0.041334	0.258505	0.159897	0.872963	0.980573	0610007P14Rik
262.47	0.520331	0.275753	1.88695	0.0591674	0.395815	0610009B22Rik
12.9661	1.85035	2.04425	0.905149	0.365386	0.815737	0610009L18Rik
32.828	0.588115	0.680647	0.864052	0.387559	0.833112	0610009O20Rik
119.708	0.0742936	0.490995	0.151312	0.879729	0.981051	0610010F05Rik
119.931	-0.316987	0.457975	-0.69215	0.488843	0.883094	0610010K14Rik
143.824	-0.137486	0.295473	-0.465306	0.641712	0.937794	0610011F06Rik
371.399	-0.347949	0.233506	-1.49011	0.136196	0.570437	0610012G03Rik
10.8503	-0.293813	1.6699	-0.175947	0.860336	0.980573	0610030E20Rik
145.922	-0.0521715	0.344644	-0.151378	0.879678	0.981051	0610037L13Rik
5.48113	-1.78648	1.92179	-0.929592	0.352582	0.807554	0610040B10Rik
5.65098	-1.53686	2.14174	-0.717574	0.47302	0.875538	0610043K17Rik
171.86	0.543751	0.398103	1.36586	0.171984	0.628434	1110001J03Rik
16.6635	-1.18462	1.37266	-0.863007	0.388134	0.833112	1110002L01Rik
190.275	0.300155	0.33597	0.893399	0.371643	0.820707	1110004E09Rik
735.902	-0.342502	0.162043	-2.11364	0.0345459	0.306445	1110004F10Rik
31.1827	1.09409	0.664115	1.64744	0.0994674	0.498584	1110007C09Rik
244.518	0.480568	0.268922	1.78702	0.0739343	0.441194	1110008F13Rik
14.6899	-0.170845	1.2918	-0.132254	0.894784	0.983906	1110008L16Rik
645.807	-0.0194461	0.165845	-0.117255	0.906658	0.985994	1110008P14Rik
33.4555	-0.249135	0.637738	-0.390655	0.696053	0.951211	1110012L19Rik
27.3274	-0.950207	1.06901	-0.888866	0.374075	0.823866	1110017D15Rik
9.98167	-0.989783	1.74367	-0.567645	0.570276	0.913938	1110019D14Rik
143.208	0.275604	0.373551	0.737794	0.460639	0.87054	1110032A03Rik
11.8922	0.271016	1.18697	0.228327	0.819392	0.976149	1110032F04Rik
45.0248	-0.469899	1.65908	-0.283228	0.777002	0.969722	1110034G24Rik
62.8346	-0.438482	0.482692	-0.908409	0.363662	0.814793	1110037F02Rik
36.935	0.73031	0.896079	0.815006	0.415069	0.848761	1110038B12Rik
33.8946	-1.53679	0.748873	-2.05213	0.0401567	0.32989	1110038F14Rik
23.2728	2.04788	0.76407	2.68023	0.00735718	0.136516	1110046J04Rik
102.776	-0.762407	0.456083	-1.67164	0.0945956	0.487049	1110051M20Rik
94.5384	-0.185018	0.379828	-0.487109	0.626181	0.932804	1110059E24Rik
87.7755	-0.446619	0.342194	-1.30516	0.191837	0.65572	1110059G10Rik
367.315	0.448759	0.189897	2.36318	0.0181191	0.220238	1110065P20Rik
66.8308	0.215256	0.427743	0.503237	0.614798	0.930171	1190002N15Rik
38.4323	-0.105844	0.761216	-0.139046	0.889414	0.982868	1190007I07Rik
47.5692	0.660689	0.568852	1.16144	0.245461	0.716339	1200014J11Rik
28.5767	0.297149	0.750265	0.396059	0.692061	0.949131	1300002E11Rik
14.0545	0.212702	1.0259	0.207332	0.835751	0.979192	1500004A13Rik
60.0416	-0.118163	0.552474	-0.213881	0.83064	0.978307	1500009C09Rik
62.5266	0.259461	0.538612	0.481721	0.630004	0.934256	1500009L16Rik
234.27	-0.498282	0.233063	-2.13797	0.0325191	0.297499	1500011B03Rik
298.506	0.00357411	0.227629	0.0157015	0.987473	0.998124	1500011K16Rik
53.3322	-0.0934091	0.63359	-0.147428	0.882794	0.981051	1500012F01Rik
6.25714	-4.16028	2.24436	-1.85366	0.063788	0.412	1500015A07Rik
20.2698	2.56468	3.07686	0.833537	0.404542	0.842945	1500015O10Rik
43.4041	-0.349084	0.746931	-0.467357	0.640244	0.937431	1500026H17Rik
11.6158	0.474168	1.62599	0.291618	0.770579	0.96843	1600002H07Rik
9.06438	-0.592875	2.20561	-0.268803	0.788081	0.971765	1600002K03Rik
14.9696	-1.41887	1.44797	-0.979904	0.327133	0.789335	1600012H06Rik
22.0107	0.058081	1.37859	0.0421306	0.966395	0.997497	1600014C10Rik
33.9349	0.234603	0.641382	0.365777	0.714532	0.955509	1600020E01Rik
5.20314	0.697199	2.70812	0.257448	0.796833		1600029O15Rik
40.6141	-0.0115016	0.556548	-0.020666	0.983512	0.997964	1700001L19Rik
25.7758	-0.238627	0.757908	-0.31485	0.752876	0.963255	1700003E16Rik
12.8873	1.02245	1.3378	0.764272	0.444705	0.862627	1700003M07Rik
19.5411	1.94353	3.20005	0.607344	0.543623	0.904259	1700007K13Rik
9.33661	-0.664535	1.74114	-0.381667	0.702708	0.953765	1700008J07Rik
6.46276	-3.21916	1.9631	-1.63984	0.101039	0.501269	1700012B09Rik
6.17695	0.772549	3.07047	0.251606	0.801346	0.973512	1700013F07Rik
6.4991	1.17278	1.52115	0.770979	0.440719	0.862245	1700016K19Rik
14.6114	2.02418	1.48842	1.35995	0.173846	0.630937	1700017B05Rik
28.3888	-0.974323	0.672153	-1.44955	0.147183	0.593091	1700019D03Rik
11.0439	-0.366032	1.57789	-0.231976	0.816557	0.976123	1700019G17Rik
850.669	0.0264431	0.218949	0.120773	0.903871	0.985994	1700020I14Rik
160.293	-0.398104	0.264511	-1.50506	0.132309	0.563527	1700021F05Rik
27.8707	0.0550592	0.631388	0.0872034	0.93051	0.989924	1700021K19Rik
9.7503	-0.104431	1.76442	-0.059187	0.952803	0.994488	1700024P16Rik
254.358	-0.220488	0.248321	-0.887916	0.374586	0.824085	1700025G04Rik
14.0313	1.19063	1.43501	0.829702	0.406708	0.844826	1700028P14Rik
10.3376	0.597759	1.36149	0.439048	0.660627	0.945323	1700030J22Rik
7.53292	4.04472	2.03034	1.99214	0.0463558	0.353869	1700030K09Rik
6.28471	1.00919	1.97097	0.51203	0.60863	0.92821	1700037C18Rik
118.36	-1.18968	0.303678	-3.91757	8.94442e-05	0.00873446	1700037H04Rik
7.42916	-5.86979	2.80647	-2.09152	0.0364813	0.314651	1700040L02Rik
35.5529	-0.105627	0.633606	-0.166707	0.8676	0.980573	1700047M11Rik
7.90005	-0.374004	2.09611	-0.178428	0.858387	0.980573	1700048O20Rik
10.8078	-0.440959	1.77688	-0.248164	0.804007	0.974621	1700049G17Rik
36.659	-0.160614	0.748916	-0.214462	0.830187	0.978307	1700066M21Rik
14.3074	-0.13117	1.07192	-0.122369	0.902607	0.985994	1700084C01Rik
123.816	0.143605	0.362199	0.39648	0.691751	0.949047	1700086L19Rik
11.0689	2.11958	1.80127	1.17671	0.239309	0.709045	1700086O06Rik
18.5113	0.1837	1.19714	0.153449	0.878044	0.981051	1700088E04Rik
23.5992	-1.03431	1.30119	-0.794896	0.426674	0.855799	1700094D03Rik
27.5498	-0.852409	0.701925	-1.21439	0.2246	0.695717	1700096K18Rik
6.23077	-0.0543213	2.20392	-0.0246476	0.980336	0.997942	1700101I11Rik
9.84895	1.7745	1.55867	1.13847	0.254925	0.726206	1700113A16Rik
7.16415	0.489673	1.9742	0.248036	0.804107	0.974621	1700123M08Rik
68.6121	-0.283956	0.4741	-0.598937	0.549215	0.906028	1700123O20Rik
6.46148	-2.6198	3.08884	-0.848149	0.396355	0.837418	1700124L16Rik
10.5233	-0.718528	2.19715	-0.327028	0.743647	0.963255	1810010H24Rik
108.132	0.968062	0.445785	2.17159	0.0298867	0.28448	1810013L24Rik
8.85561	0.844616	2.3222	0.363714	0.716071	0.955509	1810014B01Rik
347.85	-0.110078	0.233993	-0.470434	0.638045	0.936394	1810022K09Rik
80.3199	-0.283038	0.406987	-0.695447	0.486776	0.882089	1810026B05Rik
38.2676	-1.70158	0.667916	-2.54759	0.010847	0.16781	1810026J23Rik
39.6964	0.782167	0.622663	1.25616	0.209056	0.676293	1810030O07Rik
16.4398	1.24904	1.58926	0.785924	0.431912	0.857728	1810032O08Rik
635.41	0.0782085	0.163574	0.478122	0.632563	0.93473	1810037I17Rik
54.4805	-1.20052	0.494364	-2.42842	0.015165	0.200397	1810041L15Rik
29.9449	-0.78105	2.07859	-0.375759	0.707096	0.95491	1810043G02Rik
386.249	-0.00549792	0.195037	-0.0281892	0.977511	0.997817	1810043H04Rik
15.0283	1.48092	1.49568	0.990128	0.322112	0.784713	1810055G02Rik
81.5704	-0.740133	0.496633	-1.4903	0.136144	0.570437	1810058I24Rik
165.984	-0.435575	0.267653	-1.62739	0.103655	0.506619	2010012O05Rik
1608.36	0.145762	0.127861	1.14	0.254285	0.725807	2010107E04Rik
27.3115	-0.104669	0.89495	-0.116956	0.906895	0.985994	2010107G23Rik
39.3595	0.0746259	2.03588	0.0366553	0.97076	0.997667	2010111I01Rik
159.888	-0.106006	0.329139	-0.322069	0.7474	0.963255	2010204K13Rik
265.507	-0.3585	0.225014	-1.59323	0.111108	0.521851	2010300C02Rik
44.5617	-0.300376	0.692785	-0.433577	0.664596	0.946271	2010315B03Rik
31.2094	0.908434	0.992348	0.915439	0.359961	0.812342	2010320M18Rik
5.87249	-5.53065	3.03284	-1.82359	0.0682142	0.424653	2210011C24Rik
157.741	-0.0395518	0.351788	-0.112431	0.910482	0.987	2210013O21Rik
77.6071	0.122628	0.474229	0.258583	0.795957	0.973406	2210015D19Rik
30.3148	0.374777	0.865806	0.432865	0.665113	0.946271	2210016F16Rik
613.49	0.074485	0.268796	0.277106	0.781699	0.970348	2210016L21Rik
61.0602	-0.057939	0.632433	-0.0916129	0.927006	0.989403	2210018M11Rik
12.4024	0.647144	1.11101	0.582481	0.560243	0.911104	2210404O09Rik
5.6775	0.0732609	1.8647	0.0392883	0.968661	0.997667	2210406O10Rik
49.9398	0.228379	0.702512	0.325089	0.745114	0.963255	2210408F21Rik
49.1998	-0.9067	0.770619	-1.17659	0.23936	0.709045	2210408I21Rik
76.9747	-0.26524	0.360098	-0.736576	0.46138	0.87061	2300009A05Rik
16.3763	1.16665	0.897925	1.29927	0.19385	0.657967	2310002F09Rik
106.481	0.173387	0.303997	0.570359	0.568434	0.912676	2310009A05Rik
63.4365	-0.180492	0.423257	-0.426437	0.669789	0.946419	2310009B15Rik
45.3911	-0.568381	0.686419	-0.828037	0.407649	0.844826	2310010J17Rik
27.56	0.685894	0.69998	0.979876	0.327147	0.789335	2310011J03Rik
18.6397	1.95926	1.03707	1.88924	0.0588601	0.394322	2310015A10Rik
16.3296	1.59859	1.48199	1.07868	0.28073	0.749706	2310022A10Rik
79.4746	-0.46819	0.496578	-0.942833	0.345766	0.802517	2310022B05Rik
5.26833	1.31848	3.23617	0.407421	0.683699		2310030G06Rik
60.3579	-1.02919	0.470599	-2.18698	0.0287443	0.279817	2310033P09Rik
153.336	1.03874	0.326441	3.18203	0.00146249	0.0524993	2310035C23Rik
137.19	-0.130177	0.298523	-0.436072	0.662785	0.946271	2310036O22Rik
66.4161	0.0189536	0.602316	0.0314678	0.974896	0.997667	2310039H08Rik
66.5145	-0.703241	0.440378	-1.5969	0.110287	0.52041	2310045N01Rik
13.3436	0.921407	1.06698	0.863565	0.387827	0.833112	2310047M10Rik
47.1536	-0.4846	0.737283	-0.657278	0.511002	0.89065	2310057M21Rik
48.599	0.199096	0.569842	0.349388	0.726798	0.958392	2310061I04Rik
13.027	0.00306602	1.53084	0.00200283	0.998402	0.999803	2310067B10Rik
10.5589	-3.97348	2.14549	-1.85202	0.0640229	0.412567	2310069G16Rik
47.9625	-1.07701	0.628843	-1.71269	0.0867702	0.472633	2410002F23Rik
84.9264	-1.16433	0.506208	-2.3001	0.0214426	0.240404	2410004B18Rik
9.57952	1.65202	1.99274	0.829022	0.407092	0.844826	2410004I01Rik
142.002	-0.545429	0.377831	-1.44358	0.148857	0.595171	2410006H16Rik
492.433	-0.0444784	0.182685	-0.24347	0.807641	0.975636	2410015M20Rik
6.3712	1.1008	2.62749	0.418955	0.675249	0.946976	2410016O06Rik
114.215	-0.368442	0.323007	-1.14066	0.25401	0.725516	2410089E03Rik
11.6187	-0.669938	1.28797	-0.52015	0.602959	0.927502	2410127L17Rik
15.2001	0.387935	1.4427	0.268896	0.78801	0.971765	2410131K14Rik
25.8869	-1.1015	1.41207	-0.78006	0.435356	0.859596	2500004C02Rik
42.2702	-2.02124	0.67615	-2.98934	0.00279582	0.0779282	2510002D24Rik
102.066	-0.761997	0.426233	-1.78775	0.0738169	0.44095	2510009E07Rik
29.0511	-0.714895	0.726826	-0.983584	0.32532	0.788658	2510039O18Rik
17.7228	0.677776	0.849957	0.797424	0.425205	0.855281	2610001J05Rik
80.2003	-0.369973	0.378264	-0.978081	0.328034	0.790177	2610002M06Rik
34.8182	-0.180135	0.777985	-0.23154	0.816895	0.976123	2610008E11Rik
18.9258	-1.04807	1.26589	-0.827931	0.40771	0.844826	2610015P09Rik
12.5408	-2.26916	1.50634	-1.50641	0.131963	0.563527	2610035D17Rik
24.4299	-2.20168	0.845696	-2.60339	0.0092306	0.154422	2610044O15Rik8
22.9713	0.253788	1.09505	0.23176	0.816725	0.976123	2610100L16Rik
146.895	0.119611	0.324254	0.368881	0.712216	0.955509	2610301B20Rik
26.7946	-0.284386	0.652598	-0.435775	0.663	0.946271	2610306M01Rik
236.161	-0.182799	0.271587	-0.673077	0.500899	0.88775	2610507B11Rik
60.3623	0.229067	0.465539	0.492047	0.622686	0.932197	2610507I01Rik
105.874	0.413956	0.324428	1.27595	0.201972	0.66803	2610524H06Rik
7.29563	-5.84887	2.22161	-2.63272	0.00847037	0.147296	2610528A11Rik
287.939	-0.00688531	0.260631	-0.0264179	0.978924	0.997942	2700029M09Rik
6.66022	1.23799	2.43629	0.508143	0.611353	0.929053	2700046G09Rik
27.6692	-0.72989	0.719364	-1.01463	0.310282	0.777384	2700049A03Rik
277.555	0.00633028	0.207172	0.0305557	0.975624	0.997774	2700060E02Rik
44.0696	0.770245	0.572617	1.34513	0.178583	0.637105	2700062C07Rik
25.4498	0.893307	0.974434	0.916745	0.359276	0.811435	2700081O15Rik
137.895	-0.134626	0.401716	-0.335127	0.737529	0.962455	2700094K13Rik
20.9227	0.449904	0.819274	0.54915	0.582903	0.918598	2700097O09Rik
47.4024	0.628298	0.530202	1.18502	0.236011	0.707584	2810001G20Rik
16.9425	0.277108	1.34488	0.206047	0.836754	0.979671	2810002D19Rik
231.213	0.325238	0.323252	1.00614	0.314347	0.778855	2810004N23Rik
69.3905	-0.139893	0.41088	-0.340471	0.733502	0.960252	2810006K23Rik
125.387	-0.887381	0.341117	-2.6014	0.00928439	0.155049	2810013P06Rik
16.978	-1.24595	1.16606	-1.06851	0.285291	0.754512	2810021J22Rik
39.7819	-1.24384	0.826224	-1.50545	0.132207	0.563527	2810025M15Rik
8.44718	0.461923	1.97467	0.233924	0.815044	0.976113	2810032G03Rik
48.8431	1.19516	1.56223	0.765031	0.444253	0.862627	2810403A07Rik
358.907	-0.171156	0.196081	-0.872883	0.382727	0.830695	2810428I15Rik
6.04479	-0.339644	2.50652	-0.135504	0.892213	0.98383	2810429I04Rik
7.27347	-0.677436	1.65414	-0.409539	0.682144	0.948099	2810454H06Rik
14.4007	-0.557511	1.14242	-0.488007	0.625545	0.932592	2810459M11Rik
35.2693	-1.10006	1.09407	-1.00548	0.314665	0.778921	2810468N07Rik
60.8474	0.896578	0.510372	1.75671	0.0789666	0.452928	2810474O19Rik
10.5146	1.92003	1.48434	1.29353	0.195828	0.660939	2900008C10Rik
14.2554	0.3236	1.19067	0.271779	0.785792	0.971447	2900009J06Rik
504.363	-0.381915	0.197856	-1.93027	0.0535734	0.377339	2900011O08Rik
56.7965	-0.0544086	0.465654	-0.116843	0.906984	0.985994	2900026A02Rik
103.69	0.143328	0.340109	0.421417	0.673451	0.946588	2900052N01Rik
132.875	0.289728	0.305388	0.948724	0.342761	0.801039	2900055J20Rik
16.7211	1.12336	1.13773	0.987371	0.323461	0.786005	2900060B14Rik
34.8596	-0.293891	0.705077	-0.416822	0.676809	0.9475	2900076A07Rik
17.724	2.58824	0.971422	2.66438	0.00771293	0.140311	2900079G21Rik
99.9322	1.84508	0.453931	4.06466	4.81032e-05	0.00543425	2900092D14Rik
180.616	0.169309	0.297738	0.56865	0.569594	0.913236	2900097C17Rik
47.3853	-0.00347792	0.514392	-0.00676123	0.994605	0.999803	3010026O09Rik
41.1436	1.63187	0.626022	2.60673	0.00914111	0.153771	3110002H16Rik
13.3416	-0.879641	1.67492	-0.525184	0.599456	0.925694	3110009E18Rik
6.09809	-5.58645	2.96721	-1.88273	0.0597374	0.398815	3110021A11Rik
15.3903	-0.487806	1.14957	-0.424338	0.671319	0.946493	3110021N24Rik
306.405	-0.741545	0.28537	-2.59854	0.00936202	0.155764	3110035E14Rik
28.9045	-1.32901	0.805029	-1.65089	0.0987612	0.498478	3110039I08Rik
72.2987	0.224551	0.611168	0.367413	0.713311	0.955509	3110039M20Rik
31.8307	-1.05466	0.818367	-1.28874	0.197489	0.662288	3110040N11Rik
51.8874	1.50848	0.456234	3.30638	0.000945102	0.0404848	3110043O21Rik
9.03075	0.768112	2.02584	0.379158	0.704571	0.953915	3110045C21Rik
22.4659	-0.0411202	0.950297	-0.043271	0.965486	0.997497	3110052M02Rik
21.9458	-0.961935	0.97064	-0.991032	0.32167	0.784024	3110056K07Rik
8.78409	1.08022	1.80783	0.597522	0.550159	0.906676	3110057O12Rik
7.97101	-0.0376029	2.00797	-0.0187268	0.985059	0.997964	3110062M04Rik
22.171	0.155349	0.878091	0.176917	0.859574	0.980573	3110082I17Rik
7.69705	-5.92093	2.91409	-2.03183	0.0421708	0.33988	3110082J24Rik
6.98019	1.70265	2.40866	0.706885	0.479638	0.879678	3300002I08Rik
6.02943	2.40227	2.18457	1.09966	0.271482	0.739722	3300002P13Rik
27.3047	1.04295	0.896782	1.16299	0.244834	0.716228	3632451O06Rik
89.1196	0.0728162	0.435272	0.167289	0.867143	0.980573	3830406C13Rik
5.54538	0.0790229	2.59288	0.0304768	0.975687	0.997774	4430402I18Rik
30.5051	1.5343	0.758436	2.02298	0.0430749	0.342894	4632404H12Rik
88.1294	0.28459	0.397452	0.716037	0.473969	0.876348	4632415L05Rik
6.61938	-2.55032	1.74464	-1.4618	0.143795	0.586562	4632428N05Rik
38.6945	-0.125333	0.708701	-0.176849	0.859627	0.980573	4732471J01Rik
8.00646	-2.12428	1.69998	-1.24959	0.211451	0.678703	4732491K20Rik
24.6067	-1.02436	1.28571	-0.796725	0.425611	0.855407	4831440E17Rik
60.0264	-0.821578	0.496898	-1.65341	0.0982471	0.496666	4833420G17Rik
13.563	-1.13885	1.41106	-0.807085	0.419618	0.85281	4833422C13Rik
166.493	-0.305586	0.248515	-1.22965	0.218829	0.689261	4833439L19Rik
15.5596	-2.1852	1.07259	-2.03732	0.041618	0.33701	4921504A21Rik
107.613	-0.0153014	0.34685	-0.0441153	0.964813	0.997497	4921524J17Rik
10.6709	1.16551	1.39734	0.834093	0.404228	0.842782	4921531C22Rik
61.2375	-0.611464	0.47871	-1.27731	0.201491	0.667371	4930402H24Rik
6.9103	-3.10924	2.48229	-1.25257	0.210363	0.677961	4930412C18Rik
5.08638	0.058977	3.31834	0.017773	0.98582		4930413F20Rik
6.11594	4.17785	2.49337	1.67558	0.0938198	0.485881	4930429B21Rik
210.087	0.580911	0.436152	1.3319	0.182893	0.642688	4930430F08Rik
19.2662	1.20198	3.29613	0.364665	0.715362	0.955509	4930447C04Rik
38.3363	0.556163	0.661981	0.840149	0.400825	0.840283	4930447M23Rik
6.6999	0.877682	1.91689	0.457867	0.647048	0.940828	4930452B06Rik
30.2729	1.03332	0.836783	1.23487	0.216879	0.687458	4930453N24Rik
6.62107	2.71079	2.35229	1.1524	0.249155	0.720786	4930469G21Rik
12.6078	1.8303	1.48943	1.22886	0.219123	0.689261	4930481A15Rik
24.994	-1.41572	3.31873	-0.426585	0.669682	0.946419	4930503L19Rik
8.69632	2.93816	1.87619	1.56602	0.117343	0.533811	4930506C21Rik
4.83798	0.429596	2.7551	0.155928	0.87609		4930507D05Rik
13.9551	0.98665	1.52215	0.648194	0.516859	0.892785	4930523C07Rik
8.38322	0.879252	1.99023	0.441784	0.658645	0.944775	4930525G20Rik
15.0354	-2.15195	1.53238	-1.40432	0.160224	0.612765	4930526I15Rik
22.4571	0.490451	0.867958	0.565063	0.572031	0.914729	4930570G19Rik
7.10912	-0.00130721	1.93714	-0.000674813	0.999462	0.999907	4930579K19Rik
34.5471	-1.69777	0.753352	-2.25362	0.0242198	0.255806	4931406C07Rik
64.7035	-0.671302	0.474238	-1.41554	0.156911	0.606035	4931406P16Rik
5.94531	-5.54777	2.55571	-2.17074	0.029951	0.284757	4931408D14Rik
13.0341	-0.0710644	1.60567	-0.0442584	0.964698	0.997497	4931414P19Rik
4.34294	-5.10035	3.38871	-1.5051	0.132298		4931428F04Rik
5.30599	-5.38541	3.13901	-1.71564	0.0862276		4931440P22Rik
7.47674	1.59203	1.96504	0.810177	0.417838	0.851566	4932416H05Rik
494.079	-0.356285	0.161802	-2.20198	0.0276669	0.274241	4932438A13Rik
6.77628	5.72776	2.16309	2.64795	0.00809816	0.144451	4932443I19Rik
7.14237	-0.287251	1.91293	-0.150163	0.880636	0.981051	4933404O12Rik
12.3817	1.01076	1.74306	0.579876	0.561998	0.911987	4933406I18Rik
11.6301	0.0143351	1.55221	0.00923532	0.992631	0.999411	4933412E12Rik
5.96	-5.55618	2.96752	-1.87233	0.0611605	0.403638	4933412O06Rik
28.5767	1.06412	0.837235	1.27099	0.203732	0.669264	4933421O10Rik
47.8896	-0.286437	0.53564	-0.534756	0.592819	0.922616	4933427D14Rik
10.9689	2.91259	4.19467	0.694356	0.487459	0.882585	4933427G17Rik
59.6416	-0.0127461	0.75914	-0.0167902	0.986604	0.998076	4933431E20Rik
396.067	0.31105	0.215889	1.44079	0.149645	0.596536	4933434E20Rik
77.0671	-0.170594	0.474146	-0.359792	0.719003	0.95619	5031426D15Rik
21.4701	-0.471275	0.807707	-0.583473	0.559575	0.911104	5031439G07Rik
28.8341	-0.387594	0.69293	-0.559356	0.575919	0.916257	5330417C22Rik
61.229	-0.522847	0.480522	-1.08808	0.276559	0.744626	5330434G04Rik
17.5058	0.947907	1.07526	0.881559	0.378015	0.825774	5430402O13Rik
44.8807	-0.736648	0.491279	-1.49945	0.133757	0.566233	5430405H02Rik
72.156	-0.601926	0.462533	-1.30137	0.193132	0.657255	5430416N02Rik
4.83217	-2.14708	2.47531	-0.867395	0.385725		5430416O09Rik
24.2764	-0.165101	0.853644	-0.193407	0.84664	0.9804	5530601H04Rik
8.16212	0.605949	1.63082	0.371562	0.710219	0.955509	5730408K05Rik
61.3031	1.56983	0.6922	2.26789	0.023336	0.251202	5730409E04Rik
202.429	-0.364355	0.392428	-0.928463	0.353167	0.808388	5730455P16Rik
7.17566	1.5944	1.89203	0.84269	0.399402	0.839684	5730480H06Rik
15.2199	-0.811927	1.59923	-0.5077	0.611664	0.929053	5730508B09Rik
23.4911	-1.9879	1.09755	-1.81121	0.0701077	0.430869	5730522E02Rik
7.52187	-0.418158	2.32238	-0.180056	0.857109	0.980573	5830415F09Rik
18.3418	0.0549837	0.838011	0.0656121	0.947687	0.992937	5830417I10Rik
9.47118	-0.72755	2.3999	-0.303159	0.761769	0.965145	5830454E08Rik
10.9594	0.294095	1.48263	0.19836	0.842763	0.9804	5930403L14Rik
4.31752	-5.09206	3.40162	-1.49695	0.134407		5930412G12Rik
17.5427	0.0927588	1.08228	0.0857069	0.931699	0.990027	5930430L01Rik
30.4341	0.0211627	0.649764	0.0325699	0.974018	0.997667	6030419C18Rik
51.5567	-0.204903	0.660058	-0.310432	0.756233	0.963255	6030458C11Rik
133.026	0.400948	0.292661	1.37001	0.170684	0.627566	6330403A02Rik
314.123	0.233702	0.201802	1.15808	0.246833	0.717189	6330403K07Rik
10.367	-0.367961	1.70057	-0.216375	0.828696	0.977987	6330415B21Rik
8.85483	-0.43324	2.21222	-0.19584	0.844736	0.9804	6330416G13Rik
22.7229	1.09537	0.867183	1.26313	0.206541	0.671761	6330418K02Rik
184.134	-1.17874	0.28654	-4.1137	3.89366e-05	0.00457823	6430548M08Rik
28.7871	-2.84822	1.0246	-2.77985	0.00543845	0.11459	6430573F11Rik
7.79517	-5.94197	2.18562	-2.71866	0.00655467	0.12867	6530402F18Rik
24.6099	-0.757049	1.09692	-0.690162	0.490092	0.883214	6530403H02Rik
11.5529	-0.782358	1.61858	-0.483362	0.628839	0.93361	6820408C15Rik
10.5994	1.11153	1.14279	0.972645	0.33073	0.79262	6820431F20Rik
5.99841	0.105281	3.12545	0.033685	0.973128	0.997667	7630403G23Rik
4.5981	-5.18014	4.08599	-1.26778	0.204877		8030423J24Rik
11.3256	-2.40107	1.63451	-1.46898	0.141838	0.581961	8030462N17Rik
114.863	-0.208707	0.423383	-0.492951	0.622047	0.932197	8430419L09Rik
24.6222	-0.0364521	0.737534	-0.0494243	0.960581	0.996818	8430429K09Rik
58.7516	-1.82398	0.479206	-3.80627	0.000141081	0.0119975	9030624J02Rik
5.04169	-1.13682	2.31221	-0.491658	0.622961		9130011E15Rik
6.22924	-2.55858	2.49344	-1.02612	0.304834	0.773019	9130019O22Rik
5.90657	2.02217	3.07649	0.657296	0.51099	0.89065	9130023H24Rik
28.1901	-2.01006	1.08852	-1.8466	0.0648055	0.414699	9130024F11Rik
92.721	-0.6026	1.34058	-0.449506	0.653067	0.942439	9130401M01Rik
18.7123	0.382512	0.910474	0.420124	0.674395	0.946976	9230110C19Rik
30.5911	-0.773287	1.18023	-0.655201	0.512338	0.890852	9230114K14Rik
15.5762	0.101466	1.42917	0.0709966	0.9434	0.992937	9330020H09Rik
14.2136	0.14279	1.60162	0.0891533	0.92896	0.989924	9330102E08Rik
25.2742	-1.12439	1.01106	-1.11209	0.266101	0.7358	9330133O14Rik
30.8108	-1.59276	2.64599	-0.60195	0.547207	0.905979	9330151L19Rik
263.923	0.624993	0.309494	2.0194	0.0434455	0.34471	9330159F19Rik
6.07366	-1.34467	2.24259	-0.599605	0.54877	0.905979	9330162012Rik
15.8313	1.15078	1.37745	0.835443	0.403469	0.842467	9330182L06Rik
40.8737	0.899687	0.737193	1.22042	0.222305	0.692764	9430016H08Rik
73.0629	0.00966986	0.454019	0.0212984	0.983008	0.997964	9430020K01Rik
12.0441	0.598841	1.60288	0.373604	0.708699	0.955509	9430038I01Rik
15.4798	1.40941	3.22928	0.436446	0.662513	0.946271	9430065F17Rik
14.9432	0.69711	0.975963	0.714279	0.475054	0.876677	9430083A17Rik
4.06681	-5.00615	3.57228	-1.40139	0.161098		9530052E02Rik
12.1564	0.461253	1.16633	0.395475	0.692492	0.949131	9530059O14Rik
53.8442	-0.109069	0.479483	-0.227471	0.820058	0.976439	9530068E07Rik
15.9812	0.413321	1.48289	0.278726	0.780455	0.970348	9530077C05Rik
9.76255	-0.223537	2.68096	-0.0833794	0.93355	0.990027	9530080O11Rik
16.2393	-0.251217	3.29358	-0.0762748	0.9392	0.991608	9530091C08Rik
12.0521	-1.08276	1.20899	-0.895588	0.370473	0.819349	9630013A20Rik
20.6081	1.05454	0.858469	1.2284	0.219297	0.689295	9830147E19Rik
6.21491	-5.61629	2.49088	-2.25474	0.0241496	0.255534	9830166K06Rik
153.842	-0.0963761	0.293533	-0.328332	0.742661	0.963255	9930021J03Rik
5.0944	-3.75706	2.44787	-1.53483	0.124825		9930104L06Rik
28.0271	0.35241	0.998017	0.35311	0.724006	0.957954	A130010J15Rik
4.4847	-0.470126	3.48903	-0.134744	0.892814		A230009B12Rik
105.536	0.211911	0.325988	0.650059	0.515654	0.892085	A230046K03Rik
14.3822	-0.0797527	1.08264	-0.073665	0.941277	0.992669	A230050P20Rik
9.01779	1.91254	1.69557	1.12796	0.259336	0.730642	A230056J06Rik
17.6215	1.79005	1.44352	1.24006	0.214954	0.683665	A230057D06Rik
9.11144	-0.253798	1.7425	-0.145652	0.884196	0.981653	A230065H16Rik
48.391	1.24695	0.530283	2.35147	0.0186992	0.224683	A230070E04Rik
18.6311	-0.630767	0.945524	-0.667108	0.504703	0.888865	A230072C01Rik
4.7978	-2.76816	2.26121	-1.22419	0.22088		A2m
7.53948	0.254931	1.93433	0.131793	0.895148	0.983906	A330009N23Rik
20.9533	0.231161	0.778683	0.296862	0.766572	0.967281	A330023F24Rik
23.7786	0.665141	1.2475	0.533181	0.593908	0.923336	A330048O09Rik
94.8791	0.552923	0.371453	1.48854	0.136609	0.57117	A330050F15Rik
51.7289	0.00558083	0.530562	0.0105187	0.991607	0.998976	A330069E16Rik
7.04896	0.396544	2.52239	0.157209	0.87508	0.980573	A330070K13Rik
64.8921	-1.08206	0.442574	-2.44494	0.0144878	0.195254	A330076H08Rik
8.77456	3.43006	2.26833	1.51215	0.130496	0.560876	A330102I10Rik
166.32	0.277889	0.319744	0.869098	0.384794	0.831541	A430005L14Rik
10.2148	-1.33509	1.52031	-0.878172	0.37985	0.827257	A430033K04Rik
18.4002	0.720372	1.4115	0.510359	0.6098	0.928597	A430035B10Rik
13.9079	-0.529319	1.43917	-0.367795	0.713026	0.955509	A430046D13Rik
32.8416	0.714103	1.94545	0.367062	0.713573	0.955509	A530058N18Rik
11.7115	-0.925544	4.18853	-0.220971	0.825115	0.97682	A630066F11Rik
12.4328	-0.688461	1.4864	-0.463174	0.64324	0.93883	A630072M18Rik
9.58324	-0.742179	1.23343	-0.601717	0.547362	0.905979	A630089N07Rik
138.777	-0.999455	0.293398	-3.40648	0.000658065	0.0323377	A730017C20Rik
8.5261	-1.18702	1.60302	-0.740488	0.459004	0.869854	A730017L22Rik
19.1764	-0.157658	0.96328	-0.163668	0.869993	0.980573	A730020E08Rik
24.7119	0.900632	0.853437	1.0553	0.291288	0.760252	A730056A06Rik
364.109	-0.130307	0.199285	-0.653875	0.513193	0.890876	A830010M20Rik
217.077	-0.0718758	0.228927	-0.313969	0.753545	0.963255	A830018L16Rik
49.0988	0.0126588	0.563323	0.0224716	0.982072	0.997964	A830080D01Rik
17.64	0.619532	1.50952	0.410416	0.681501	0.948097	A830082K12Rik
40.7806	0.645643	0.542755	1.18957	0.234217	0.706623	A830082N09Rik
11.0463	-2.80894	1.87091	-1.50138	0.133258	0.565572	A930004D18Rik
87.7257	0.138587	0.35337	0.392187	0.69492	0.950678	A930005H10Rik
7.29845	1.54482	2.87968	0.536457	0.591643	0.921856	A930006K02Rik
11.1439	-0.244673	1.96199	-0.124707	0.900756	0.985325	A930013F10Rik
15.7624	1.18704	1.57697	0.752736	0.451609	0.865781	A930017M01Rik
17.2746	0.81732	1.00695	0.811675	0.416978	0.850708	A930024E05Rik
12.6474	0.623603	1.03291	0.603736	0.546019	0.905979	AA387883
10.4535	0.0427312	1.65817	0.0257701	0.979441	0.997942	AA388235
15.355	0.515117	1.59521	0.322915	0.74676	0.963255	AA414768
5.36134	0.835765	2.62944	0.317849	0.750599		AA415398
16.8188	-4.63365	1.5195	-3.04946	0.00229253	0.0687939	Aaas
27.5254	-1.07941	0.677649	-1.59288	0.111187	0.521851	Aacs
85.2827	-0.0480158	0.374752	-0.128127	0.898049	0.983906	Aagab
416.369	-0.119274	0.240421	-0.496106	0.61982	0.931427	Aak1
198.023	-0.326262	0.323545	-1.0084	0.313264	0.778211	Aamdc
267.967	-0.168664	0.244171	-0.690762	0.489715	0.883094	Aamp
40.971	-0.804577	0.708734	-1.13523	0.256278	0.728027	Aar2
123.525	-0.401173	0.983346	-0.407967	0.683298	0.948242	Aars
22.3957	0.176838	1.38129	0.128023	0.898131	0.983906	Aars2
68.1824	-0.16101	0.507673	-0.317153	0.751128	0.963255	Aarsd1
13.6727	-0.487327	1.00578	-0.484526	0.628013	0.933511	Aasdh
159.806	0.249301	0.33705	0.739656	0.459509	0.869854	Aasdhppt
13.9752	1.72736	1.60999	1.0729	0.283318	0.751919	Aass
12.7844	0.143725	1.56649	0.0917502	0.926897	0.989403	Aatf
22.7102	0.993155	0.888856	1.11734	0.263849	0.733585	Aatk
395.97	0.103845	0.225227	0.461068	0.64475	0.939328	Abat
83.9649	0.878404	0.367491	2.39028	0.0168357	0.212919	Abca1
105.32	-0.114678	0.330762	-0.346708	0.728811	0.959299	Abca2
55.1439	-0.0865107	0.487332	-0.177519	0.859101	0.980573	Abca3
153.969	0.0721476	0.425159	0.169695	0.86525	0.980573	Abca5
24.5049	-3.1735	1.01584	-3.12403	0.00178395	0.0604601	Abca8a
29.1948	0.640017	0.710561	0.900721	0.367737	0.816932	Abca8b
16.9944	0.320187	1.42989	0.223924	0.822816	0.976504	Abca9
22.4629	0.539462	1.06136	0.508272	0.611263	0.929053	Abcb10
18.7566	-1.52914	1.48784	-1.02776	0.304063	0.772186	Abcb1a
10.3803	-3.77266	1.61762	-2.33223	0.0196887	0.231616	Abcb1b
17.1169	2.44944	1.12734	2.17276	0.0297986	0.284246	Abcb4
9.87818	-2.18762	2.11824	-1.03275	0.301719	0.770985	Abcb6
62.5696	-0.337117	0.478872	-0.703981	0.481444	0.880804	Abcb7
47.9429	0.60232	0.543176	1.10888	0.26748	0.7358	Abcb8
12.8713	-0.349884	1.78866	-0.195612	0.844914	0.9804	Abcb9
23.9159	-1.51448	1.27849	-1.18458	0.236182	0.707584	Abcc1
140.938	0.871812	0.380924	2.28868	0.0220979	0.244606	Abcc5
16.2216	-3.87781	1.41937	-2.73206	0.00629395	0.125476	Abcc8
76.4194	0.358931	0.448627	0.800064	0.423674	0.854614	Abcd2
80.0803	-0.068725	0.444466	-0.154624	0.877118	0.981051	Abcd3
10.1917	-0.121137	1.79972	-0.0673085	0.946336	0.992937	Abcd4
226.926	-0.0823569	0.211373	-0.389628	0.696812	0.951797	Abce1
160.033	-0.182833	0.319524	-0.572204	0.567184	0.912676	Abcf1
143.499	-0.795038	0.395641	-2.00949	0.0444848	0.348752	Abcf2
78.0207	-0.294923	0.43331	-0.680629	0.496106	0.885368	Abcf3
95.7695	-0.738185	0.428619	-1.72224	0.0850263	0.468531	Abcg1
44.6992	-0.233887	0.530391	-0.440971	0.659234	0.944775	Abcg2
17.6237	0.239048	1.24202	0.192467	0.847377	0.9804	Abcg4
63.5525	-0.963281	0.503385	-1.91361	0.0556705	0.384818	Abhd10
21.9449	-2.63645	1.2489	-2.11101	0.0347714	0.307051	Abhd11
352.379	-0.289943	0.235518	-1.23109	0.21829	0.689222	Abhd12
63.7915	-0.113104	0.705779	-0.160254	0.872681	0.980573	Abhd13
43.6523	-0.287906	0.636101	-0.45261	0.65083	0.941936	Abhd14a
12.0631	-0.163305	1.36006	-0.120072	0.904426	0.985994	Abhd14b
7.01045	0.859469	2.01234	0.4271	0.669307	0.946419	Abhd15
82.5832	0.0375675	0.491033	0.076507	0.939016	0.991551	Abhd16a
366.936	-0.677995	0.230689	-2.93901	0.00329268	0.0850707	Abhd17a
124.171	0.12765	0.406411	0.314091	0.753452	0.963255	Abhd17b
62.3531	1.5606	0.577663	2.70158	0.00690119	0.131375	Abhd17c
6.44254	0.0622291	2.02616	0.0307128	0.975499	0.997774	Abhd2
94.3099	0.122524	0.344772	0.355377	0.722308	0.957155	Abhd3
51.8581	-0.289497	0.564268	-0.51305	0.607916	0.92821	Abhd4
24.3377	0.222112	0.866856	0.256228	0.797775	0.973406	Abhd5
191.511	-0.128026	0.272906	-0.469122	0.638982	0.93648	Abhd6
86.6055	0.660232	0.453193	1.45685	0.145159	0.588193	Abhd8
378.057	0.610336	0.203893	2.99341	0.0027588	0.0773471	Abi1
486.761	-0.232168	0.152667	-1.52075	0.128323	0.556556	Abi2
24.0699	-0.00279595	0.849101	-0.00329284	0.997373	0.999803	Abl1
98.2449	-0.336157	0.454651	-0.739373	0.459681	0.869854	Abl2
112.29	0.50966	0.434651	1.17257	0.240967	0.711517	Ablim1
25.1938	0.446318	0.67306	0.663118	0.507255	0.889387	Ablim2
13.949	1.8429	1.84823	0.997116	0.318708	0.781007	Ablim3
326.173	0.289527	0.263936	1.09696	0.272659	0.740603	Abr
103.436	-0.167304	0.443636	-0.377119	0.706085	0.954443	Abracl
27.4964	0.0295277	0.702331	0.0420425	0.966465	0.997497	Abt1
17.2601	1.03498	1.00185	1.03307	0.301573	0.770985	Abtb1
13.9889	3.95697	1.6315	2.42536	0.0152931	0.201168	Abtb2
21.1909	1.15305	1.41812	0.813084	0.41617	0.849741	Acaa1a
44.5039	-0.594914	0.789508	-0.753524	0.451135	0.865781	Acaa2
36.8523	-0.927654	0.91069	-1.01863	0.30838	0.775356	Acaca
14.0327	0.867043	1.15675	0.749549	0.453526	0.866676	Acad11
10.74	0.950267	1.69493	0.560654	0.575034	0.916257	Acad8
52.0989	0.0997816	0.610136	0.16354	0.870093	0.980573	Acad9
56.1926	0.649867	0.602065	1.0794	0.280411	0.749171	Acadl
107.821	-0.282668	0.339837	-0.831776	0.405535	0.843651	Acadm
157.168	1.01245	0.352235	2.87437	0.00404838	0.0958571	Acadsb
58.8524	-0.0597284	0.441672	-0.135232	0.892428	0.98383	Acadvl
269.025	0.244987	0.265482	0.9228	0.356111	0.809776	Acap2
50.3013	-0.273287	0.609329	-0.448504	0.653789	0.942439	Acap3
318.159	-0.125793	0.22025	-0.571141	0.567904	0.912676	Acat1
23.8414	-1.15284	0.862723	-1.33627	0.18146	0.641451	Acat2
135.668	-0.442985	0.380384	-1.16457	0.244192	0.715439	Acbd3
19.7619	0.200185	1.04222	0.192075	0.847683	0.9804	Acbd4
235.877	0.638023	0.272563	2.34083	0.0192408	0.228569	Acbd5
145.204	0.824384	0.441435	1.86751	0.0618304	0.406547	Acbd6
32.8598	-4.53199	1.0227	-4.4314	9.36249e-06	0.00136562	Acd
5.42073	-5.42152	2.70286	-2.00585	0.0448726		Acer2
28.0278	-1.14717	0.873221	-1.31373	0.188938	0.652424	Acer3
16.2309	2.00965	0.960782	2.09168	0.0364668	0.314651	Ache
158.548	-0.192253	0.345874	-0.555846	0.578316	0.916257	Acin1
48.5373	-0.740361	0.585545	-1.2644	0.206088	0.671023	Ackr1
19.5288	1.2668	1.35666	0.933763	0.350426	0.804856	Ackr3
62.8505	0.0172201	0.438118	0.0393047	0.968647	0.997667	Acly
32.0644	-2.92026	0.771674	-3.78432	0.000154126	0.0126621	Aco1
502.665	-0.182014	0.180349	-1.00923	0.312863	0.777972	Aco2
29.7564	-0.156731	0.834594	-0.187793	0.851039	0.980573	Acot1
17.5889	0.599688	1.17838	0.508907	0.610817	0.928982	Acot11
736.181	-0.258615	0.152382	-1.69715	0.0896687	0.478136	Acot13
69.8274	1.05109	0.518324	2.02786	0.042575	0.340925	Acot2
13.7578	1.00787	1.44887	0.695624	0.486665	0.882089	Acot5
397.504	-0.333368	0.185295	-1.79912	0.071999	0.435583	Acot7
7.56336	1.32978	2.07738	0.640125	0.522091	0.895082	Acot8
43.7459	0.410429	0.558832	0.734441	0.46268	0.871866	Acot9
202.529	-0.356181	0.247887	-1.43687	0.150755	0.597781	Acox1
153.562	0.0528252	0.274173	0.192671	0.847217	0.9804	Acp1
65.8156	-0.756182	0.535221	-1.41284	0.157702	0.606782	Acp2
14.8451	-0.252564	3.38587	-0.0745934	0.940538	0.992475	Acp6
86.8732	0.0114212	0.394802	0.0289288	0.976921	0.997774	Acsbg1
15.5465	-1.46611	1.5592	-0.940299	0.347064	0.802665	Acsf3
53.2379	-0.69727	0.514687	-1.35475	0.175499	0.63381	Acsl1
588.329	0.0835755	0.268471	0.311301	0.755572	0.963255	Acsl3
512.317	0.60631	0.265677	2.28214	0.0224813	0.246206	Acsl4
63.4729	0.17158	0.449733	0.381515	0.702821	0.953765	Acsl5
195.94	-0.584484	0.275463	-2.12182	0.0338526	0.302625	Acsl6
8.41902	-1.60826	2.30238	-0.698519	0.484853	0.881428	Acss1
58.0628	0.743343	0.416659	1.78405	0.0744148	0.442914	Acss2
41.7643	-0.44034	1.05954	-0.415597	0.677705	0.947938	Acta1
9.84067	-0.512579	2.16159	-0.23713	0.812556	0.97569	Acta2
17528	0.989243	0.652633	1.51577	0.129577	0.558592	Actb
97.4809	0.742717	0.405055	1.83362	0.0667102	0.421049	Actg1
62.5829	0.385191	0.489314	0.787205	0.431162	0.857339	Actl6a
118.575	-0.217689	0.373372	-0.583035	0.55987	0.911104	Actl6b
69.5995	0.220542	0.552711	0.399019	0.689879	0.948542	Actn1
10.5437	-0.33563	1.44383	-0.232458	0.816182	0.976123	Actn2
88.8339	0.0141619	0.430262	0.0329146	0.973743	0.997667	Actn4
220.139	0.252132	0.227291	1.10929	0.267305	0.7358	Actr10
109.516	-1.32312	0.38413	-3.44447	0.00057219	0.0290456	Actr1a
81.2472	-0.848559	0.458392	-1.85117	0.0641456	0.412567	Actr1b
1627.64	1.07166	0.19886	5.38902	7.08411e-08	3.54914e-05	Actr2
270.015	0.0878751	0.234223	0.375176	0.707529	0.955115	Actr3
52.0949	1.24168	0.609853	2.03604	0.0417465	0.337576	Actr3b
4.8588	0.402226	3.37432	0.119202	0.905115		Actr5
202.723	0.406899	0.317	1.28359	0.199285	0.663879	Actr6
78.3276	0.184823	0.445657	0.414721	0.678346	0.947938	Actr8
33.9096	2.30138	1.00199	2.2968	0.0216299	0.241277	Acvr1
117.77	1.06273	0.5331	1.99349	0.0462076	0.353869	Acvr1c
161.559	-0.0735554	0.308062	-0.238769	0.811285	0.975637	Acvr2a
16.0716	-0.151978	1.5419	-0.0985654	0.921483	0.988593	Acvr2b
87.0888	0.320948	0.390135	0.82266	0.410701	0.846906	Acyp1
149.988	0.413576	0.302697	1.3663	0.171844	0.628423	Acyp2
24.5127	-2.65421	1.04714	-2.53473	0.0112535	0.170645	Adal
541.635	0.940108	0.527382	1.78259	0.0746524	0.442956	Adam10
34.9438	-1.03602	0.848583	-1.22088	0.22213	0.692764	Adam11
15.2796	-1.46727	1.21992	-1.20276	0.22907	0.702056	Adam15
17.1409	0.0845679	1.00581	0.0840791	0.932994	0.990027	Adam17
256.081	0.795299	0.256767	3.09736	0.00195254	0.0644673	Adam22
257.847	1.42458	0.237212	6.00552	1.90722e-09	1.46512e-06	Adam23
35.8627	0.725237	0.581454	1.24728	0.212294	0.67959	Adam9
8.69389	1.01919	1.40913	0.72328	0.469508	0.874165	Adamts1
7.99517	-5.98261	2.43016	-2.46181	0.0138237	0.190084	Adamts13
5.71255	1.50661	3.1123	0.484081	0.628328	0.93361	Adamts17
28.5616	0.81102	1.43423	0.565474	0.571751	0.914729	Adamts20
10.5168	-0.457486	1.46304	-0.312696	0.754512	0.963255	Adamts3
5.03888	-5.31214	3.18454	-1.6681	0.0952957		Adamts8
17.3925	-1.73105	1.07663	-1.60784	0.107871	0.516941	Adamtsl1
90.6827	1.12009	0.578538	1.93608	0.0528582	0.375296	Adap1
8.99917	-6.14716	2.15544	-2.85192	0.00434558	0.0997492	Adap2
61.6683	-1.20718	0.490067	-2.4633	0.0137664	0.189665	Adar
95.2515	0.124139	0.492909	0.251849	0.801158	0.973512	Adarb1
32.5496	-0.428611	0.871137	-0.492013	0.62271	0.932197	Adarb2
6.27684	2.01087	2.62288	0.766667	0.443279	0.862245	Adat1
11.6873	-0.204818	1.48916	-0.137539	0.890605	0.98326	Adat2
4.28339	-5.08148	3.60319	-1.41027	0.15846		Adat3
26.2641	-1.31815	0.750152	-1.75718	0.0788872	0.452928	Adck1
11.8402	3.09953	1.83804	1.68632	0.0917343	0.483299	Adck2
38.0486	-0.753583	0.874421	-0.861808	0.388793	0.833112	Adck3
7.37012	-1.68339	1.97138	-0.853913	0.393153	0.83584	Adck4
566.049	-0.0386054	0.215378	-0.179245	0.857746	0.980573	Adcy1
122.916	-0.134124	0.495106	-0.2709	0.786468	0.971447	Adcy2
78.6119	-0.161879	0.512628	-0.315782	0.752168	0.963255	Adcy3
13.7114	-1.69418	1.1007	-1.53919	0.123757	0.547431	Adcy5
7.81142	2.46098	1.74836	1.4076	0.15925	0.610865	Adcy6
14.755	2.50527	1.15178	2.17513	0.0296207	0.283488	Adcy8
137.196	0.251715	0.314982	0.799142	0.424208	0.854614	Adcy9
10.8038	0.503534	1.43486	0.350929	0.725642	0.958392	Adcyap1
83.6288	-0.115349	0.438168	-0.263253	0.792356	0.972925	Adcyap1r1
501.29	-0.0837956	0.175174	-0.478356	0.632397	0.93473	Add1
204.42	-0.489517	0.268559	-1.82275	0.0683408	0.425211	Add2
337.023	-0.0727298	0.206707	-0.351849	0.724951	0.958163	Add3
214.422	-0.171528	0.246843	-0.694887	0.487126	0.882294	Adgra1
20.1972	-0.229869	0.899828	-0.255458	0.798369	0.973436	Adgra2
84.7462	-0.510659	0.434134	-1.17627	0.239487	0.709045	Adgrb1
101.399	0.0271995	0.372383	0.0730419	0.941773	0.992686	Adgrb2
164.41	0.0126369	0.381619	0.033114	0.973584	0.997667	Adgrb3
16.9223	0.769251	1.89787	0.405324	0.685239	0.948242	Adgre1
9.88612	-1.30945	2.13966	-0.61199	0.540544	0.903152	Adgre5
12.0019	0.622666	2.04608	0.304322	0.760883	0.965145	Adgrf5
47.1278	-0.681623	0.476987	-1.42902	0.152999	0.600409	Adgrg1
12.1611	-0.80856	1.50224	-0.538237	0.590413	0.921361	Adgrg2
198.07	0.434951	0.282725	1.53843	0.123945	0.547938	Adgrl1
41.1793	-0.750216	0.668116	-1.12288	0.261488	0.731273	Adgrl2
66.8162	-1.49377	0.457077	-3.26809	0.00108278	0.0444015	Adgrl3
8.15856	-2.17483	2.31199	-0.940673	0.346873	0.802665	Adgrv1
88.4932	0.141685	0.451839	0.313574	0.753844	0.963255	Adh5
40.0755	1.41862	0.766378	1.85106	0.0641604	0.412567	Adhfe1
29.165	-0.939492	0.739282	-1.27082	0.203794	0.669264	Adi1
154.434	-0.286947	0.399795	-0.717734	0.472921	0.875538	Adipor1
120.278	0.837113	0.349066	2.39815	0.0164781	0.21074	Adipor2
190.794	0.274456	0.271421	1.01118	0.311931	0.777667	Adk
17.706	-0.108089	1.00564	-0.107483	0.914406	0.987646	Adnp2
126.008	-0.268988	0.376713	-0.714039	0.475203	0.876683	Ado
115.741	-0.264965	0.373278	-0.709834	0.477807	0.878331	Adora1
8.65505	1.44284	2.23464	0.645669	0.518494	0.893196	Adora2b
9.80536	-1.97637	1.40359	-1.40808	0.159106	0.610516	Adpgk
129.542	0.358948	0.317088	1.13201	0.257628	0.729611	Adprh
28.0876	0.942392	0.795285	1.18497	0.236028	0.707584	Adprm
9.73737	-0.537848	1.3015	-0.413252	0.679422	0.947938	Adra1d
12.1852	1.37594	2.02775	0.678556	0.497419	0.886721	Adra2a
18.5546	1.33514	1.2843	1.03959	0.298532	0.76854	Adra2c
23.0283	0.702197	0.835237	0.840716	0.400507	0.840283	Adrb1
6.76839	1.90046	2.94334	0.645682	0.518485	0.893196	Adrb2
85.7673	-0.30106	0.408371	-0.737223	0.460987	0.87054	Adrbk1
164.921	-0.2551	0.309689	-0.823731	0.410092	0.846408	Adrbk2
50.5084	-0.835281	0.740279	-1.12833	0.259179	0.730392	Adrm1
35.5182	-1.13023	0.678234	-1.66643	0.0956269	0.490391	Adsl
179.912	0.242044	0.280529	0.862815	0.388239	0.833112	Adss
34.2705	-0.563058	0.696684	-0.808197	0.418977	0.852579	Adssl1
19.3474	-2.75617	1.26647	-2.17627	0.0295354	0.282906	Aebp1
102.49	-0.137431	0.357457	-0.384468	0.700632	0.953234	Aebp2
1176.28	-0.354593	0.169407	-2.09313	0.0363371	0.313878	Aes
14.721	0.336066	1.32763	0.253133	0.800165	0.973512	AF251705
10.9328	0.318158	1.39086	0.228749	0.819064	0.976149	AF357359
9.01796	0.77479	1.79503	0.431631	0.666009	0.946271	AF357425
38.1659	-0.571924	0.582927	-0.981125	0.326531	0.789211	Afap1
16.936	1.22445	1.38508	0.884025	0.376683	0.825474	Afap1l1
5.20168	1.66424	3.21943	0.516935	0.605202		Afap1l2
13.8603	-1.73553	1.17904	-1.47199	0.141025	0.5807	Aff1
21.4194	-0.279822	1.03777	-0.269637	0.78744	0.971765	Aff2
45.1932	-0.395511	0.506316	-0.781153	0.434712	0.85893	Aff3
388.414	0.299096	0.197286	1.51605	0.129506	0.558497	Aff4
21.428	0.559913	0.809782	0.691437	0.489291	0.883094	Afg3l1
98.0021	0.316679	0.399191	0.793302	0.427602	0.856378	Afg3l2
195.657	0.377285	0.351583	1.0731	0.283225	0.751919	Aftph
46.0604	1.19957	0.714461	1.67898	0.093155	0.484091	Aga
136.626	0.122788	0.365771	0.335698	0.737099	0.962447	Agap1
210.193	1.91341	0.763206	2.50707	0.0121736	0.178338	Agap2
62.7258	0.371121	0.622342	0.596329	0.550955	0.906956	Agap3
25.4627	1.20713	1.08256	1.11506	0.264824	0.734432	Agbl3
16.8205	-0.208815	0.972336	-0.214756	0.829957	0.978307	Agbl4
104.325	0.397572	0.369473	1.07605	0.281904	0.751297	Agfg1
155.819	0.217277	0.351256	0.618572	0.536198	0.900767	Agfg2
129.178	-0.0566578	0.297221	-0.190625	0.848819	0.9804	Aggf1
45.6566	-0.63174	0.653497	-0.966708	0.33369	0.794128	Agk
47.8021	-0.773501	0.567263	-1.36357	0.172704	0.62937	Agl
60.4644	0.80809	0.675411	1.19644	0.231524	0.704226	Ago1
63.6996	-0.0952236	0.463851	-0.205289	0.837346	0.979767	Ago2
60.5655	0.0854515	0.544358	0.156977	0.875263	0.980573	Ago3
8.74889	-3.00234	2.01048	-1.49334	0.135347	0.569245	Ago4
90.1793	1.15517	0.42749	2.70222	0.00688786	0.131375	Agpat1
8.57478	2.01438	2.7004	0.745955	0.455694	0.867964	Agpat2
130.241	-0.0700186	0.371903	-0.188271	0.850664	0.980573	Agpat3
54.057	0.351074	0.455755	0.770314	0.441114	0.862245	Agpat4
348.242	0.0361552	0.287907	0.125579	0.900065	0.984943	Agpat5
76.4814	-0.669792	0.376044	-1.78115	0.0748879	0.443439	Agpat6
59.7667	0.800959	0.412033	1.94392	0.0519053	0.373376	Agps
17.5692	-0.749338	1.19858	-0.625186	0.531849	0.89837	Agrn
19.4694	-0.666115	0.858519	-0.775888	0.437815	0.861929	Agt
413.27	-0.125297	0.205217	-0.610555	0.541494	0.903152	Agtpbp1
7.27894	-3.40468	2.05253	-1.65878	0.097161	0.494298	Agtrap
99.1541	-0.155736	0.410202	-0.379655	0.704201	0.953861	Ahctf1
9.02662	0.589265	1.28489	0.458611	0.646514	0.940778	Ahcy
468.002	0.100151	0.170122	0.588697	0.556065	0.910301	Ahcyl1
199.673	0.0345254	0.249635	0.138303	0.890001	0.983029	Ahcyl2
19.4524	1.36813	0.874238	1.56495	0.117596	0.53459	Ahdc1
1402.92	0.136533	0.141399	0.965592	0.334248	0.794128	Ahi1
22.0868	1.29403	0.971798	1.33159	0.182995	0.642688	Ahnak
15.4993	1.25757	1.08218	1.16207	0.245206	0.716269	Ahr
27.1629	-0.886112	0.672583	-1.31748	0.187679	0.650936	Ahsa1
58.6497	0.767407	0.463902	1.65425	0.0980776	0.496114	Ahsa2
9.41643	-6.21379	2.05204	-3.0281	0.002461	0.0717928	AI115009
151.618	-0.522541	0.360849	-1.44809	0.147592	0.593201	AI314180
405.19	-0.901618	0.239364	-3.76672	0.000165404	0.0129122	AI413582
15.5318	-1.38526	0.981758	-1.411	0.158244	0.608018	AI414108
11.5157	1.00926	1.39948	0.721173	0.470803	0.874165	AI464131
94.1359	0.379913	0.554102	0.685637	0.492942	0.883798	AI504432
609.486	0.854523	0.261785	3.26422	0.00109767	0.0446941	AI593442
40.598	-0.223425	0.587652	-0.380199	0.703797	0.953861	AI597479
39.1341	1.28126	0.561353	2.28244	0.0224633	0.246206	AI837181
15.6674	-0.243647	1.41753	-0.171881	0.863531	0.980573	AI846148
24.4776	-3.12223	1.21447	-2.57085	0.010145	0.163269	AI854517
23.4164	-0.606035	0.787413	-0.769652	0.441506	0.862245	AI854703
32.2551	-0.667592	0.772548	-0.864143	0.387509	0.833112	AI987944
52.9008	-0.235241	0.571282	-0.411778	0.680502	0.947938	Aida
55.2508	-0.277008	0.732041	-0.378405	0.70513	0.954023	Aif1
16.3604	0.0804636	1.45079	0.0554618	0.955771	0.99523	Aif1l
98.5662	-0.27299	0.363741	-0.750505	0.452951	0.866676	Aifm1
11.117	-2.75731	2.04	-1.35162	0.176496	0.634734	Aifm2
30.8367	-1.57673	1.19159	-1.32322	0.185764	0.64826	Aifm3
74.297	-0.196516	0.449332	-0.437351	0.661857	0.946271	Aig1
4.75959	-5.22968	2.89576	-1.80598	0.0709214		Aim2
230.483	0.253308	0.260743	0.971485	0.331307	0.79262	Aimp1
83.2587	0.208827	0.410906	0.508212	0.611305	0.929053	Aimp2
163.933	-0.531911	0.264098	-2.01407	0.0440021	0.347112	Aip
100.629	0.846424	0.542932	1.55899	0.118999	0.537737	Ajap1
36.7478	-0.0608812	0.773791	-0.0786791	0.937288	0.991528	AK010878
157.848	-0.151932	0.444555	-0.341761	0.732531	0.960219	Ak1
67.7025	-0.49338	0.396773	-1.24348	0.21369	0.681505	Ak2
82.0467	0.0274063	0.421563	0.065011	0.948165	0.992937	Ak3
46.8686	-0.30274	0.672893	-0.449908	0.652776	0.942439	Ak4
425.504	-0.455145	0.197747	-2.30165	0.0213547	0.239834	Ak5
39.1011	-0.0577744	0.78626	-0.07348	0.941424	0.992669	Ak6
9.39539	5.29572	1.73825	3.04658	0.00231462	0.0689716	Ak7
21.9593	-0.483581	0.755979	-0.639675	0.522384	0.895082	Akap1
39.0174	0.512814	0.767934	0.667784	0.504272	0.888865	Akap10
881.82	0.0133096	0.157906	0.0842884	0.932827	0.990027	Akap11
53.6048	0.0900113	0.539007	0.166995	0.867374	0.980573	Akap12
62.5148	0.493841	0.512705	0.963206	0.335444	0.794844	Akap13
66.5788	-0.409732	0.446225	-0.918218	0.358505	0.811123	Akap17b
112.862	-0.493748	0.347819	-1.41956	0.155737	0.603619	Akap5
433.104	-0.492448	0.225541	-2.1834	0.0290061	0.28137	Akap6
117.626	-0.0188883	0.376564	-0.0501596	0.959995	0.996667	Akap7
40.1095	0.424346	0.707807	0.599522	0.548825	0.905979	Akap8
88.7473	-0.699008	0.584736	-1.19543	0.231921	0.704226	Akap8l
393.911	0.355038	0.269819	1.31584	0.188229	0.651116	Akap9
25.3499	-0.810394	0.893703	-0.906782	0.364522	0.815379	Akip1
203.319	-0.172072	0.291175	-0.590958	0.554549	0.909359	Akirin1
110.071	-0.0555047	0.396237	-0.14008	0.888597	0.98279	Akirin2
565.741	0.548768	0.192615	2.84905	0.00438506	0.10018	Akr1a1
55.1304	-0.708372	0.501312	-1.41304	0.157645	0.606782	Akr1b10
4.39168	-5.1167	4.15759	-1.23069	0.218439		Akr1b8
18.6497	0.159606	0.856368	0.186375	0.852151	0.980573	Akr1c18
104.439	-0.605431	0.588801	-1.02824	0.303835	0.772186	Akr1e1
20.1804	0.371533	0.811783	0.457675	0.647186	0.940828	Akr7a5
64.5978	-0.386395	0.558352	-0.692028	0.48892	0.883094	Akt1
8.17958	-3.57077	1.83948	-1.94118	0.0522362	0.374452	Akt1s1
34.474	0.00326093	0.706038	0.00461864	0.996315	0.999803	Akt2
170.737	0.226309	0.382227	0.592082	0.553796	0.908765	Akt3
367.183	0.00105136	0.297528	0.00353366	0.997181	0.999803	Aktip
42.8783	0.497663	0.794284	0.626556	0.53095	0.89837	Alad
76.9357	0.301987	0.439337	0.687372	0.491849	0.883487	Alas1
478.527	0.227794	0.17547	1.29819	0.194221	0.658431	Alcam
6.10654	1.67897	2.52545	0.664821	0.506165	0.889017	Aldh16a1
11.7978	0.701683	1.59873	0.4389	0.660734	0.945323	Aldh18a1
84.1145	0.477277	0.500247	0.954084	0.340041	0.799	Aldh1a1
4.97587	-3.7091	2.88289	-1.28659	0.198236		Aldh1a2
35.7673	0.0433555	0.791208	0.0547966	0.9563	0.995359	Aldh1l1
30.1432	1.00829	0.985697	1.02292	0.306344	0.774368	Aldh2
40.5188	1.15008	0.679437	1.69269	0.0905137	0.480926	Aldh3a2
23.0499	-0.0706079	1.12775	-0.0626096	0.950077	0.993283	Aldh3b2
9.02808	-0.475861	1.71741	-0.277081	0.781718	0.970348	Aldh4a1
44.0168	0.255286	0.627391	0.406901	0.684081	0.948242	Aldh5a1
77.4467	0.526566	0.457383	1.15126	0.249625	0.720786	Aldh6a1
88.206	-0.620831	0.451248	-1.37581	0.168881	0.626439	Aldh7a1
42.4575	1.42898	0.620185	2.30412	0.0212159	0.239677	Aldh9a1
3795.32	-0.22574	0.113537	-1.98826	0.0467832	0.354722	Aldoa
942.463	-0.108189	0.235735	-0.458945	0.646274	0.940635	Aldoc
31.0519	1.58819	0.934329	1.69982	0.0891656	0.477776	Alg1
5.49155	-1.56952	2.64567	-0.593241	0.55302	0.908261	Alg10b
73.1271	0.42297	0.442763	0.955298	0.339427	0.798343	Alg11
25.7325	1.85989	0.775261	2.39904	0.0164379	0.210729	Alg13
44.2767	-0.384243	0.58713	-0.654443	0.512827	0.890863	Alg14
101.166	-1.25128	0.404853	-3.0907	0.00199684	0.0651849	Alg2
17.7667	-0.955975	1.39205	-0.686741	0.492246	0.88362	Alg3
60.9401	1.04135	1.6355	0.636718	0.524309	0.895547	Alg5
17.1923	0.0609955	0.920583	0.0662574	0.947173	0.992937	Alg6
29.152	-1.8761	0.907405	-2.06754	0.0386832	0.322304	Alg9
11.9147	2.05448	1.21353	1.69298	0.0904586	0.480926	Alkbh1
6.69508	-0.77179	2.41975	-0.318954	0.749761	0.963255	Alkbh2
18.3773	-1.49287	1.17876	-1.26647	0.205344	0.670718	Alkbh3
8.56371	-1.24309	2.19784	-0.565598	0.571667	0.914729	Alkbh4
286.741	1.26082	0.812531	1.55172	0.120729	0.540573	Alkbh5
228.813	-0.831656	0.232051	-3.58393	0.000338462	0.0210816	Alkbh6
112.286	0.210884	0.332494	0.63425	0.525918	0.895862	Alkbh7
34.2704	-0.257212	0.705698	-0.364479	0.7155	0.955509	Alkbh8
13.324	-1.37954	1.94556	-0.709072	0.47828	0.878702	Alox5ap
4.90036	-3.79868	2.4168	-1.57178	0.116002		Alox8
8.74483	-0.412331	2.19463	-0.187882	0.850969	0.980573	Alpl
9.84158	0.489111	1.50583	0.324812	0.745323	0.963255	Als2
89.5739	1.06845	0.466925	2.28826	0.0221222	0.244639	Alyref
5.31202	0.895629	2.30422	0.388691	0.697505		Alyref2
42.0278	-1.85828	0.656054	-2.8325	0.0046185	0.103018	Amacr
10.7218	-1.75958	1.45733	-1.20741	0.227276	0.699982	Ambra1
16.4173	-0.959898	1.37741	-0.696887	0.485873	0.881499	Amdhd2
12.2531	-2.98671	1.35027	-2.21193	0.0269716	0.270257	Amer1
78.3973	-0.440297	0.412594	-1.06714	0.285907	0.755499	Amer2
29.9712	-1.0275	0.795083	-1.29232	0.196246	0.661346	Amer3
146.376	0.614178	0.320446	1.91664	0.0552839	0.38316	Amfr
19.3503	-0.941065	0.885625	-1.0626	0.287964	0.757581	Amigo1
21.7097	-1.96805	1.30613	-1.50679	0.131865	0.563502	Amigo2
12.2521	-3.08689	1.37349	-2.24748	0.0246091	0.256413	Ammecr1l
12.1556	-1.67084	1.66662	-1.00253	0.316087	0.779138	Amn
69.5854	0.355725	0.494635	0.719166	0.472038	0.874907	Amn1
43.3378	1.40325	0.817324	1.71688	0.0860002	0.470775	Amot
26.8522	2.34666	0.70872	3.31112	0.000929238	0.0402906	Amotl1
16.6529	-1.10716	0.890474	-1.24334	0.213743	0.681505	Amotl2
17.8476	-0.386327	1.41262	-0.273483	0.784482	0.971267	Ampd2
11.9692	-0.459425	1.68401	-0.272816	0.784995	0.971447	Ampd3
171.335	-0.155174	0.423767	-0.366178	0.714232	0.955509	Amph
7.59378	-0.805082	1.78414	-0.451244	0.651814	0.942439	Amy1
57.9578	-0.85339	0.522436	-1.63348	0.102368	0.504096	Amz2
74.737	-0.577537	0.419081	-1.3781	0.168172	0.626107	Anapc1
90.8214	0.142795	0.346949	0.411574	0.680652	0.947938	Anapc10
595.375	-0.343046	0.160967	-2.13116	0.0330759	0.299677	Anapc11
361.755	0.43337	0.206473	2.09892	0.0358239	0.312018	Anapc13
13.9339	-0.490393	1.02884	-0.476645	0.633615	0.934872	Anapc15
196.218	0.100065	0.278708	0.359033	0.719571	0.956292	Anapc16
84.9805	0.10324	0.394368	0.261787	0.793486	0.972996	Anapc2
163.298	-0.103854	0.317554	-0.327043	0.743636	0.963255	Anapc4
84.2028	-0.168629	0.440745	-0.382601	0.702016	0.953732	Anapc5
37.9872	-1.5665	0.919026	-1.70452	0.0882832	0.475368	Anapc7
12.1662	-1.00875	1.58938	-0.63468	0.525637	0.895862	Ang
157.72	-0.153249	0.317102	-0.483279	0.628898	0.93361	Angel2
43.3301	-0.569729	0.562533	-1.01279	0.31116	0.777384	Angpt1
39.8933	-0.723821	0.677343	-1.06862	0.285242	0.754512	Angptl6
192.222	-0.347167	0.281204	-1.23457	0.216989	0.68748	Ank
11.5976	-2.10117	1.37039	-1.53326	0.125211	0.550206	Ank1
463.768	0.536717	0.209845	2.55768	0.0105374	0.166055	Ank2
576.198	-0.0571668	0.171216	-0.333887	0.738465	0.96292	Ank3
78.121	0.511266	0.405836	1.25978	0.207748	0.673685	Ankfy1
104.23	-0.327025	0.43036	-0.759886	0.447323	0.862903	Ankhd1
103.748	-0.921329	0.356331	-2.5856	0.00972108	0.158663	Ankib1
89.844	0.776081	0.455205	1.7049	0.0882125	0.475209	Ankle2
58.9648	-0.138079	0.530909	-0.260081	0.794802	0.973273	Ankmy2
282.057	0.286892	0.247709	1.15818	0.24679	0.717189	Ankra2
41.8358	0.426699	0.725501	0.588144	0.556436	0.910301	Ankrd10
204.699	0.197404	0.268672	0.73474	0.462498	0.871666	Ankrd11
999.116	0.0602089	0.148348	0.405862	0.684844	0.948242	Ankrd12
39.4819	0.518077	0.557231	0.929735	0.352508	0.807554	Ankrd13a
19.9086	0.0353017	1.01075	0.0349261	0.972139	0.997667	Ankrd13b
36.8323	-0.171925	0.563586	-0.305055	0.760324	0.965121	Ankrd13c
22.5479	0.861097	0.791124	1.08845	0.276398	0.744626	Ankrd13d
14.8382	-0.662952	1.40911	-0.470478	0.638014	0.936394	Ankrd16
292.2	0.0104561	0.25175	0.0415336	0.966871	0.997497	Ankrd17
23.2377	-1.13194	1.0153	-1.11488	0.264902	0.734472	Ankrd24
66.9116	-0.462894	0.739913	-0.625605	0.531574	0.89837	Ankrd26
6.38094	-0.156144	1.79535	-0.0869712	0.930694	0.989924	Ankrd27
38.2859	-0.699419	0.911188	-0.76759	0.442731	0.862245	Ankrd28
86.7206	0.210679	0.43937	0.479502	0.631581	0.934484	Ankrd29
84.0551	-0.376753	0.420898	-0.895117	0.370724	0.819349	Ankrd32
74.8984	0.867228	0.420256	2.06357	0.0390585	0.324961	Ankrd33b
61.2946	-1.20694	0.540761	-2.23192	0.0256201	0.262082	Ankrd34a
49.1627	0.37914	0.466985	0.811889	0.416856	0.850708	Ankrd34b
22.4193	0.897891	1.32043	0.679997	0.496507	0.885463	Ankrd35
36.3919	0.449998	0.773865	0.581494	0.560908	0.911357	Ankrd37
11.9709	-0.962297	1.47077	-0.654283	0.512929	0.890863	Ankrd39
124.145	-0.0682007	0.428578	-0.159133	0.873564	0.980573	Ankrd40
7.42825	0.454388	2.06863	0.219656	0.826139	0.97707	Ankrd42
14.5428	-0.224667	1.05064	-0.213838	0.830674	0.978307	Ankrd44
54.704	-0.0562886	0.582122	-0.0966955	0.922968	0.988968	Ankrd45
229.978	0.0773218	0.22628	0.341708	0.73257	0.960219	Ankrd46
57.1089	0.564127	0.489113	1.15337	0.24876	0.720397	Ankrd49
37.4956	-0.832132	0.557969	-1.49136	0.135867	0.570437	Ankrd50
12.4283	1.54887	1.16746	1.3267	0.184608	0.645948	Ankrd54
8.04636	-2.78429	2.07115	-1.34432	0.178844	0.637434	Ankrd55
33.991	-0.286682	0.827394	-0.346488	0.728976	0.959299	Ankrd6
13.3962	1.10874	1.21254	0.9144	0.360507	0.812462	Ankrd63
8.10652	-1.69715	1.41153	-1.20235	0.22923	0.702085	Ankrd9
19.6333	2.00662	1.08063	1.8569	0.0633249	0.410487	Anks1
663.449	0.469438	0.195523	2.40094	0.0163532	0.210242	Anks1b
22.5394	-1.35514	0.853358	-1.58801	0.112285	0.524102	Anks3
5.81227	-5.52185	2.5161	-2.1946	0.028192	0.276473	Ankzf1
101.577	0.144086	0.359816	0.400444	0.68883	0.948542	Anln
22.2342	0.480053	1.24126	0.386747	0.698944	0.952363	Ano10
458.659	0.0612683	0.194838	0.314458	0.753173	0.963255	Ano3
38.9646	0.165839	0.594631	0.278894	0.780326	0.970348	Ano4
36.3043	-0.304157	0.798049	-0.381125	0.70311	0.953843	Ano6
17.3256	-3.16954	1.20871	-2.62226	0.00873498	0.150292	Ano8
342.132	0.306264	0.230823	1.32684	0.184563	0.645948	Anp32a
118.808	0.064089	0.422285	0.151767	0.879371	0.981051	Anp32b
54.2571	0.18369	0.89885	0.204361	0.838072	0.979785	Anp32e
7.96393	-0.33098	1.61204	-0.205317	0.837324	0.979767	Antxr1
29.8627	0.972647	1.14568	0.848971	0.395897	0.836996	Anxa2
20.5224	-1.13067	1.42102	-0.795678	0.426219	0.855617	Anxa3
85.2127	-0.330633	0.383377	-0.862423	0.388455	0.833112	Anxa5
53.3199	-1.6778	0.531561	-3.15636	0.00159751	0.0557822	Anxa6
132.027	0.0245942	0.334225	0.0735857	0.94134	0.992669	Anxa7
11.6246	-1.27038	1.57048	-0.808911	0.418566	0.852145	Aox3
70.429	-0.188206	0.393312	-0.478515	0.632283	0.93473	Ap1ar
124.397	-0.642921	0.387324	-1.6599	0.0969337	0.493796	Ap1b1
146.33	-0.179563	0.438377	-0.409607	0.682094	0.948099	Ap1g1
4.9518	-5.28706	3.95881	-1.33552	0.181708		Ap1g2
112.283	-0.55303	0.488938	-1.13108	0.258019	0.729788	Ap1m1
439.168	-0.230181	0.189195	-1.21663	0.223744	0.694652	Ap1s1
121.941	0.103124	0.449495	0.229422	0.818541	0.976149	Ap1s2
156.223	0.0315836	0.291709	0.108271	0.913781	0.987646	Ap2a1
866.861	1.10857	0.59703	1.85681	0.0633382	0.410487	Ap2a2
175.15	-0.292241	0.295404	-0.989293	0.32252	0.784878	Ap2b1
374.443	-0.282775	0.206825	-1.36721	0.171558	0.628375	Ap2m1
609.05	-0.369022	0.154362	-2.39062	0.01682	0.212919	Ap2s1
89.0766	0.0621225	0.385598	0.161107	0.872009	0.980573	Ap3b1
201.251	0.350161	0.311183	1.12526	0.26048	0.731273	Ap3b2
210.612	0.0516499	0.323808	0.159508	0.873269	0.980573	Ap3d1
69.099	-0.0253271	0.469677	-0.0539245	0.956995	0.995707	Ap3m1
147.925	-0.00280164	0.290316	-0.00965032	0.9923	0.999325	Ap3m2
75.8847	-0.32329	0.361589	-0.89408	0.371279	0.820059	Ap3s1
42.3511	0.0886085	0.665393	0.133167	0.894061	0.983906	Ap3s2
15.4209	0.879272	1.38847	0.633265	0.526561	0.895862	Ap4b1
201.651	-0.0668629	0.307679	-0.217314	0.827964	0.977987	Ap4s1
9.50993	-1.09664	1.75801	-0.6238	0.532759	0.898563	Ap5m1
12.9184	1.16857	1.50094	0.778556	0.436241	0.860313	Ap5s1
13.2321	-0.426481	1.47626	-0.288892	0.772664	0.968808	Ap5z1
39.2148	-0.464153	0.672638	-0.690049	0.490163	0.883214	Apaf1
63.5702	0.501044	0.491433	1.01956	0.307938	0.775286	Apba1
199.908	0.0258595	0.265016	0.0975768	0.922268	0.988678	Apba2
14.4998	-1.12961	1.11179	-1.01602	0.309618	0.776437	Apba3
356.685	-0.538738	0.271663	-1.98311	0.0473548	0.356203	Apbb1
18.0379	1.26099	1.04522	1.20644	0.227649	0.700266	Apbb1ip
148.402	0.818573	0.380929	2.14888	0.0316437	0.293797	Apbb2
31.5562	-0.872797	0.791241	-1.10307	0.269995	0.73759	Apbb3
850.428	0.00963871	0.173059	0.055696	0.955584	0.99523	Apc
24.4043	0.512096	0.7782	0.658052	0.510505	0.89065	Apc2
12.7374	0.176134	1.18199	0.149015	0.881542	0.981051	Apeh
125.223	0.265204	0.380322	0.697315	0.485605	0.881428	Apex1
7.70915	0.660734	1.91542	0.344954	0.730129	0.959543	Apex2
15.4528	1.02837	1.14622	0.897179	0.369623	0.819071	Aph1a
52.1007	0.283485	0.570489	0.496916	0.619248	0.931427	Aph1b
8.13713	1.2137	1.57188	0.772133	0.440035	0.862245	Aph1c
165.369	-0.679209	0.278899	-2.43532	0.0148786	0.197785	Api5
67.9313	-0.795654	0.440523	-1.80616	0.0708939	0.433374	Apip
11.3692	-1.23028	1.57839	-0.779457	0.435711	0.8597	Apitd1
6.62699	-0.112515	3.01831	-0.0372776	0.970264	0.997667	Apln
1683.1	0.146153	0.115039	1.27046	0.203921	0.669264	Aplp1
576.75	-0.186107	0.244112	-0.762386	0.44583	0.862903	Aplp2
45.3581	0.219631	0.56502	0.388714	0.697487	0.952049	Apmap
159.495	-1.30917	0.339623	-3.85478	0.000115835	0.0105	Apoa1bp
8.53865	-0.124826	1.62529	-0.0768025	0.938781	0.991528	Apoa2
9.77626	-0.328523	1.90163	-0.172759	0.862841	0.980573	Apoc1
495.499	0.144959	0.203906	0.710914	0.477138	0.878331	Apod
4941.57	-0.00270962	0.109763	-0.024686	0.980305	0.997942	Apoe
8.51769	-1.43808	1.74745	-0.822959	0.410531	0.846859	Apold1
42.3849	0.112086	0.5615	0.199619	0.841778	0.9804	Apoo
10.7571	-1.77728	1.55434	-1.14343	0.252861	0.724986	Apool
101.637	-0.263766	0.319623	-0.825241	0.409235	0.845934	Apopt1
2347.99	0.0876811	0.173914	0.504162	0.614147	0.930137	App
190.905	0.613489	0.299824	2.04617	0.0407399	0.332705	Appbp2
383.323	-0.117732	0.221554	-0.53139	0.595149	0.923664	Appl1
61.4639	0.102292	0.563829	0.181423	0.856035	0.980573	Appl2
211.293	-0.457596	0.370597	-1.23475	0.216922	0.687458	Aprt
46.6433	0.624672	0.57411	1.08807	0.276564	0.744626	Aptx
62.1848	-0.462157	0.457186	-1.01087	0.312076	0.777694	Aqp11
369.475	0.196698	0.255878	0.768719	0.44206	0.862245	Aqp4
100.565	0.0877019	0.420746	0.208444	0.834882	0.978989	Aqr
132.598	-0.355423	0.307775	-1.15482	0.248166	0.7194	Ar
195.863	-0.0189895	0.379384	-0.0500534	0.96008	0.996667	Araf
340.823	0.344526	0.191426	1.79978	0.0718947	0.435564	Arap2
62.7947	-0.11088	0.644499	-0.17204	0.863406	0.980573	Arc
179.335	-0.363321	0.417445	-0.870344	0.384112	0.831198	Arcn1
82.2236	-0.909717	0.560307	-1.6236	0.10446	0.507728	Arel1
485.323	-0.368107	0.164987	-2.23113	0.0256723	0.262082	Arf1
36.483	0.325345	0.570459	0.570321	0.56846	0.912676	Arf2
529.006	-0.109097	0.215789	-0.505572	0.613157	0.929904	Arf3
210.102	0.070088	0.266	0.263488	0.792174	0.972925	Arf4
386.114	0.0820963	0.192652	0.426138	0.670007	0.946419	Arf5
89.2506	0.666279	0.404473	1.64728	0.0995009	0.498584	Arf6
37.8742	0.0941608	0.636088	0.148031	0.882318	0.981051	Arfgap1
20.1935	-0.320799	1.07204	-0.299242	0.764755	0.966165	Arfgap2
35.6811	0.827924	2.0152	0.41084	0.68119	0.948097	Arfgap3
213.607	-0.147118	0.361249	-0.407249	0.683825	0.948242	Arfgef1
85.0772	-0.210022	0.451635	-0.465026	0.641913	0.937961	Arfgef2
113.997	0.393664	0.43673	0.90139	0.367381	0.816615	Arfgef3
95.5017	-0.239104	0.382268	-0.625486	0.531652	0.89837	Arfip1
73.9357	0.31337	0.482905	0.648928	0.516385	0.892367	Arfip2
49.5174	0.323005	0.540877	0.597188	0.550382	0.906784	Arfrp1
6.50605	0.373564	2.58265	0.144644	0.884992	0.982046	Arg2
491.434	1.1199	0.555319	2.01668	0.0437287	0.346076	Arglu1
37.423	-2.49567	0.693656	-3.59786	0.000320849	0.020203	Arhgap1
25.6777	0.0693757	0.885685	0.07833	0.937566	0.991528	Arhgap10
124.618	0.118639	0.34787	0.341044	0.73307	0.960219	Arhgap12
45.6128	0.545886	0.711151	0.767609	0.44272	0.862245	Arhgap15
6.49547	2.10877	2.54345	0.829099	0.407048	0.844826	Arhgap17
21.8693	-0.368606	0.956868	-0.385221	0.700073	0.952864	Arhgap18
418.721	-0.202516	0.233394	-0.867701	0.385558	0.831971	Arhgap20
210.772	-0.0884496	0.34773	-0.254363	0.799215	0.973512	Arhgap21
7.41601	-1.1905	2.34476	-0.507728	0.611644	0.929053	Arhgap22
12.9227	0.949066	1.11093	0.854301	0.392938	0.8357	Arhgap23
6.67009	-1.18522	2.12838	-0.556865	0.57762	0.916257	Arhgap25
226.415	0.345057	0.216064	1.59701	0.110263	0.52041	Arhgap26
9.54368	-3.61778	2.05932	-1.75678	0.0789547	0.452928	Arhgap27
40.8593	-0.903316	0.700246	-1.29	0.197052	0.661797	Arhgap29
24.6445	-1.28934	0.804858	-1.60194	0.109169	0.519495	Arhgap31
121.193	-1.6981	0.486575	-3.4899	0.000483198	0.0260903	Arhgap32
30.5169	0.643481	0.62407	1.0311	0.302492	0.771667	Arhgap33
222.242	1.65234	0.356206	4.63872	3.50566e-06	0.000673261	Arhgap35
47.4041	0.595358	0.83134	0.716142	0.473904	0.876348	Arhgap39
20.5535	-1.10555	1.18443	-0.933408	0.350609	0.805115	Arhgap42
275.346	0.0296551	0.279691	0.106028	0.91556	0.987646	Arhgap44
813.107	0.195233	0.192472	1.01435	0.310417	0.777384	Arhgap5
26.0089	0.095196	1.06957	0.089004	0.929079	0.989924	Arhgap6
151.758	-0.782378	0.290486	-2.69334	0.00707393	0.133345	Arhgdia
24.6302	0.045696	0.829746	0.0550723	0.956081	0.995359	Arhgdib
420.656	0.183221	0.206973	0.885243	0.376026	0.825474	Arhgdig
15.4581	-1.57287	1.06197	-1.48109	0.138584	0.576227	Arhgef1
19.287	-0.724958	1.18069	-0.614012	0.539207	0.902569	Arhgef10
5.96818	-0.772162	2.13975	-0.360866	0.7182	0.956103	Arhgef10l
7.71412	-2.87156	1.75309	-1.638	0.101422	0.501796	Arhgef11
210.821	-0.225178	0.258384	-0.871484	0.38349	0.830869	Arhgef12
11.6512	0.00368604	2.17818	0.00169226	0.99865	0.999803	Arhgef15
31.7623	1.66414	1.03097	1.61414	0.106496	0.514315	Arhgef17
41.4666	0.27433	0.556968	0.492542	0.622336	0.932197	Arhgef18
46.8011	0.654436	0.587269	1.11437	0.26512	0.734722	Arhgef2
32.4404	0.540884	0.762043	0.709783	0.477839	0.878331	Arhgef25
69.0537	-0.40595	0.448657	-0.904812	0.365565	0.815737	Arhgef26
95.221	-0.475558	0.394498	-1.20548	0.228019	0.701032	Arhgef28
67.7733	0.0931734	0.399136	0.233438	0.815422	0.976113	Arhgef3
171.327	-0.0568654	0.297772	-0.19097	0.848549	0.9804	Arhgef4
17.1115	1.09338	1.23721	0.883745	0.376834	0.825474	Arhgef40
34.1476	-0.000122666	0.606767	-0.000202164	0.999839	0.999965	Arhgef6
92.6299	0.512434	0.388276	1.31977	0.186912	0.650103	Arhgef7
409.456	-0.413415	0.240856	-1.71644	0.0860815	0.470775	Arhgef9
200.478	0.979254	0.304864	3.21211	0.00131766	0.0491986	Arid1a
172.037	1.70049	0.249701	6.81011	9.75255e-12	1.40473e-08	Arid1b
66.1963	0.50356	0.429488	1.17247	0.24101	0.711517	Arid2
264.771	-0.229357	0.286518	-0.8005	0.423421	0.854614	Arid4a
331.261	0.39804	0.303544	1.31131	0.189753	0.65345	Arid4b
5.99992	-5.56356	2.52684	-2.20178	0.0276806	0.274241	Arid5a
116.666	-0.866689	0.427081	-2.02933	0.0424246	0.340408	Arid5b
117.769	-0.446723	0.369227	-1.20989	0.226322	0.698609	Arih1
28.8693	-0.509828	0.671798	-0.758901	0.447912	0.863381	Arih2
38.5539	-0.234735	0.66573	-0.352597	0.72439	0.957954	Arl1
42.0093	0.49905	0.550353	0.906781	0.364523	0.815379	Arl13b
103.294	0.114527	0.422787	0.270887	0.786478	0.971447	Arl14ep
50.7437	-0.303718	0.551581	-0.550631	0.581886	0.918126	Arl15
139.564	-0.226838	0.352682	-0.643179	0.520108	0.894241	Arl16
123.15	0.0779007	0.312809	0.249036	0.803333	0.9744	Arl2
89.3902	-0.38031	0.345736	-1.1	0.271332	0.739663	Arl2bp
641.824	0.10823	0.187121	0.578397	0.562996	0.911987	Arl3
249.727	0.22796	0.31592	0.721576	0.470555	0.874165	Arl4a
42.1612	-0.216858	0.908752	-0.238633	0.81139	0.975637	Arl4c
5.64026	-0.866294	2.31926	-0.373521	0.708761	0.955509	Arl4d
178.135	-0.157185	0.237414	-0.66207	0.507926	0.889387	Arl5a
40.2604	-0.221693	0.644318	-0.344074	0.730791	0.959743	Arl5b
83.6711	0.0616214	0.448471	0.137403	0.890712	0.98326	Arl6
1456.85	0.109877	0.111998	0.981065	0.326561	0.789211	Arl6ip1
247.5	-0.088463	0.285003	-0.310393	0.756262	0.963255	Arl6ip4
157.64	-0.684856	0.345427	-1.98264	0.047408	0.356203	Arl6ip5
33.3625	0.948915	0.759704	1.24906	0.211644	0.678925	Arl6ip6
177.16	-0.490516	0.298783	-1.64171	0.10065	0.500988	Arl8a
283.76	-0.197343	0.226896	-0.869748	0.384438	0.831541	Arl8b
267.51	-0.023704	0.202184	-0.11724	0.90667	0.985994	Armc1
27.3877	-1.12583	0.82386	-1.36653	0.171773	0.628423	Armc10
7.11696	-3.36425	1.88626	-1.78355	0.0744962	0.442956	Armc3
6.94957	-0.43157	1.96023	-0.220163	0.825744	0.977005	Armc5
34.4436	0.886994	0.582637	1.52238	0.127914	0.556556	Armc6
97.7686	0.11615	0.35647	0.325833	0.744551	0.963255	Armc8
20.5926	1.30433	1.1679	1.11682	0.264073	0.733585	Armc9
103.793	-0.443923	0.331913	-1.33747	0.18107	0.641201	Armcx1
74.2821	0.786553	0.420091	1.87234	0.0611595	0.403638	Armcx2
58.4297	-0.0106801	0.435015	-0.0245512	0.980413	0.997942	Armcx3
65.4031	0.366286	0.481747	0.760329	0.447058	0.862903	Armcx4
81.5404	0.423278	0.441018	0.959775	0.337169	0.79612	Armcx5
10.4647	-2.50853	1.55837	-1.60971	0.107461	0.51616	Armcx6
26.5354	0.127154	0.752892	0.168887	0.865886	0.980573	Armt1
11.3442	2.80868	1.47642	1.90236	0.0571246	0.389957	Arnt
93.1713	-0.634073	0.39388	-1.60981	0.107439	0.51616	Arnt2
51.1127	0.36885	0.46721	0.789472	0.429836	0.857339	Arntl
8.45188	1.70669	1.98123	0.86143	0.389001	0.833112	Arntl2
408.897	0.0270823	0.229495	0.118009	0.906061	0.985994	Arpc1a
8.4341	0.920918	1.96022	0.469803	0.638495	0.93648	Arpc1b
1001.48	0.0227322	0.166757	0.13632	0.891569	0.983579	Arpc2
56.1224	-0.729871	0.57507	-1.26919	0.204375	0.669943	Arpc3
58.186	0.549098	0.411032	1.3359	0.181582	0.641451	Arpc4
599.307	0.155253	0.188243	0.824749	0.409514	0.845972	Arpc5
332.518	-0.234744	0.251688	-0.932678	0.350986	0.805267	Arpc5l
15.4599	3.56257	1.38783	2.56701	0.0102581	0.164427	Arpin
610.903	0.11444	0.149461	0.765683	0.443865	0.862627	Arpp19
882.638	-0.418967	0.195123	-2.14719	0.0317779	0.293797	Arpp21
37.6252	0.850853	0.695223	1.22386	0.221007	0.69085	Arrb1
27.9411	-0.481048	0.648009	-0.742347	0.457877	0.869603	Arrb2
8.4888	-6.06471	3.25642	-1.86239	0.0625488	0.408538	Arrdc1
70.9144	-0.0100228	0.469711	-0.0213382	0.982976	0.997964	Arrdc3
22.8698	1.58926	1.33095	1.19408	0.232448	0.704966	Arrdc4
19.6469	-0.10623	1.40156	-0.075794	0.939583	0.991793	Arsa
78.0821	-0.662981	0.515416	-1.2863	0.198337	0.662831	Arsb
22.392	0.285529	0.988771	0.288771	0.772757	0.968808	Arsg
7.00856	-0.859079	1.97332	-0.435346	0.663311	0.946271	Arsj
33.394	1.27406	0.672596	1.89424	0.0581926	0.392343	Arsk
16.5544	0.415891	1.39634	0.297843	0.765823	0.966802	Art3
7.50013	0.95242	1.77123	0.537717	0.590772	0.921547	Arv1
26.5649	-1.03611	0.834096	-1.2422	0.214164	0.682092	Arx
46.9636	0.736794	0.731117	1.00776	0.313567	0.778211	Arxes1
152.101	0.180552	0.280254	0.644243	0.519418	0.893588	Arxes2
20.0682	0.385955	0.888212	0.43453	0.663904	0.946271	As3mt
64.8541	0.210752	0.571345	0.368869	0.712225	0.955509	Asah1
17.9817	0.390835	0.833483	0.468918	0.639129	0.93648	Asah2
227.532	-0.3574	0.311117	-1.14876	0.250654	0.722449	Asap1
95.1732	-0.287227	0.426916	-0.672794	0.501078	0.88775	Asap2
29.418	-0.109176	0.638507	-0.170986	0.864235	0.980573	Asb1
20.9861	0.197317	0.799437	0.24682	0.805047	0.975043	Asb13
33.3499	0.406544	0.915366	0.444132	0.656947	0.944255	Asb3
34.0263	0.550601	0.735097	0.749018	0.453846	0.866676	Asb6
46.981	1.82523	0.628705	2.90315	0.00369431	0.0909168	Asb7
67.7395	0.205692	0.400807	0.513194	0.607816	0.92821	Asb8
81.3864	-0.323804	0.47333	-0.684098	0.493913	0.884638	Ascc1
5.52391	1.7193	2.66518	0.645096	0.518865	0.893196	Ascc2
118.395	-0.0519992	0.402778	-0.129101	0.897277	0.983906	Ascc3
16.7384	-0.251443	1.24919	-0.201286	0.840475	0.9804	Ascl1
93.2487	-0.088173	0.482602	-0.182703	0.855031	0.980573	Asf1a
494.59	-0.13332	0.206099	-0.646874	0.517713	0.893159	Ash1l
56.3799	-0.344045	0.605863	-0.567859	0.570131	0.913938	Ash2l
14.991	0.973733	1.46606	0.664183	0.506573	0.889146	Asic1
30.7062	-1.43426	0.832441	-1.72296	0.0848962	0.468531	Asic2
24.6734	-1.08886	0.811937	-1.34106	0.179901	0.639616	Asl
308.083	-0.423948	0.218413	-1.94104	0.0522536	0.374452	Asna1
211.752	0.00457905	0.317915	0.0144034	0.988508	0.998385	Asns
66.431	-0.406184	0.542151	-0.749207	0.453732	0.866676	Asnsd1
47.9286	-0.320147	0.662101	-0.483531	0.628719	0.93361	Aspa
197.111	-0.00261638	0.281233	-0.00930326	0.992577	0.999411	Asph
20.4582	-0.528357	1.43119	-0.369172	0.711999	0.955509	Asphd1
96.7913	-1.42264	0.472135	-3.01321	0.00258497	0.0741461	Asphd2
32.6375	-0.147206	0.644621	-0.22836	0.819366	0.976149	Aspscr1
147.844	-0.557301	0.36913	-1.50977	0.131103	0.562431	Asrgl1
13.8927	1.62125	1.8727	0.865731	0.386638	0.832441	Aste1
176.333	-0.306569	0.275718	-1.11189	0.266185	0.7358	Astn1
10.7982	0.0921058	1.1541	0.0798071	0.936391	0.991213	Astn2
28.4873	-2.41409	0.807683	-2.9889	0.00279981	0.0779282	Asun
22.0454	-0.593815	0.907333	-0.654462	0.512814	0.890863	Asxl1
53.1136	-0.496396	0.741783	-0.669193	0.503372	0.888399	Asxl2
39.1369	0.853269	0.7533	1.13271	0.257337	0.729468	Asxl3
172.084	0.282461	0.274079	1.03058	0.302736	0.771775	Atad1
39.7831	0.199314	2.10738	0.0945789	0.924649	0.989403	Atad2
88.3788	-0.0901741	0.419367	-0.215024	0.829748	0.978307	Atad2b
33.7608	0.0252624	0.611674	0.0413005	0.967056	0.997497	Atad3a
5.4434	-5.42285	2.53383	-2.14018	0.0323402		Atad3aos
22.8033	0.414392	0.870884	0.47583	0.634196	0.934872	Atad5
26.9066	0.187946	1.00977	0.186128	0.852344	0.980573	Atat1
65.9636	-0.714785	0.489397	-1.46054	0.144141	0.587135	Atcay
459.82	-0.00864203	0.196687	-0.0439381	0.964954	0.997497	Ate1
15.6892	0.0476839	1.01856	0.0468151	0.962661	0.997279	Atf1
264.559	-0.0187847	0.215951	-0.0869858	0.930683	0.989924	Atf2
6.53145	1.07066	3.01985	0.354541	0.722933	0.957514	Atf3
148.8	0.233186	0.312669	0.745791	0.455794	0.867964	Atf4
138.046	-0.614941	0.316471	-1.94312	0.0520017	0.373376	Atf6
8.6434	-6.09087	2.04936	-2.97208	0.00295792	0.0798223	Atf6b
37.1528	0.634262	0.804896	0.788005	0.430694	0.857339	Atf7
65.5886	-0.0343187	0.773882	-0.0443461	0.964629	0.997497	Atf7ip
53.0406	0.481554	0.719434	0.669352	0.503271	0.888356	Atg10
82.2304	0.570364	0.551439	1.03432	0.300987	0.770898	Atg101
133.603	-0.017583	0.309055	-0.0568925	0.954631	0.995088	Atg12
42.084	-0.389513	0.65369	-0.595868	0.551263	0.906956	Atg13
35.068	0.344366	0.683613	0.503744	0.614441	0.930137	Atg14
42.7591	-0.131105	0.883798	-0.148342	0.882072	0.981051	Atg16l1
14.0425	0.48123	1.17342	0.410109	0.681726	0.948099	Atg2a
110.776	0.523519	0.351437	1.48965	0.136316	0.570437	Atg2b
140.42	0.592014	0.391283	1.51301	0.130278	0.560564	Atg3
20.9282	-0.0295203	1.06625	-0.0276862	0.977912	0.997918	Atg4b
34.7688	0.759327	0.670708	1.13213	0.257581	0.729611	Atg4c
18.9497	0.981068	1.11873	0.876948	0.380515	0.827334	Atg4d
151.275	-0.177377	0.283423	-0.625837	0.531422	0.89837	Atg5
39.0356	0.376138	0.909979	0.413348	0.679351	0.947938	Atg7
56.7752	-0.229403	0.637463	-0.359869	0.718945	0.95619	Atg9a
7.57956	-3.25389	2.37938	-1.36754	0.171457	0.628202	Atg9b
9.02534	1.01535	1.9156	0.530043	0.596082	0.923697	Athl1
58.2817	0.568245	0.43719	1.29977	0.19368	0.657967	Atic
352.917	0.637736	0.190002	3.35647	0.000789431	0.0360803	Atl1
74.0664	0.00501528	0.433925	0.0115579	0.990778	0.998976	Atl2
14.6685	0.909368	1.74861	0.520053	0.603027	0.927502	Atl3
80.9645	-0.100579	0.580873	-0.173151	0.862532	0.980573	Atm
190.65	-0.422044	0.243063	-1.73635	0.0825011	0.462881	Atmin
28.2314	-1.36263	0.683943	-1.99232	0.0463361	0.353869	Atn1
495.781	-0.0673771	0.221942	-0.303579	0.761448	0.965145	Atox1
7.82155	-0.704024	2.32273	-0.303102	0.761812	0.965145	Atp10b
13.7651	0.321347	1.95873	0.164059	0.869685	0.980573	Atp10d
12.169	0.987358	1.45627	0.678006	0.497768	0.886846	Atp11a
49.7028	-0.865762	0.831575	-1.04111	0.297825	0.767748	Atp11b
27.9472	-0.121116	0.712782	-0.16992	0.865073	0.980573	Atp11c
31.25	0.567282	0.868301	0.653323	0.513548	0.890876	Atp13a1
112.895	-0.255351	0.377993	-0.675545	0.49933	0.887518	Atp13a2
90.077	0.699485	0.33729	2.07384	0.0380944	0.321113	Atp13a3
14.7252	-0.470968	1.51699	-0.310462	0.756209	0.963255	Atp13a4
9.01889	0.717843	1.41273	0.508123	0.611367	0.929053	Atp13a5
306.843	0.305873	0.206826	1.47889	0.139169	0.576719	Atp1a1
827.164	-0.114537	0.160848	-0.712083	0.476413	0.877847	Atp1a2
315.99	-0.260589	0.308472	-0.844773	0.398238	0.839074	Atp1a3
5677.2	-0.16731	0.0842903	-1.98492	0.0471531	0.356203	Atp1b1
240.468	-0.503097	0.416709	-1.20731	0.227313	0.699982	Atp1b2
180.158	-0.0327741	0.299523	-0.109421	0.912869	0.987646	Atp1b3
1140.55	0.100266	0.14586	0.687412	0.491823	0.883487	Atp2a2
2845.4	0.622439	0.139835	4.45125	8.53715e-06	0.00128576	Atp2b1
479.845	-0.35246	0.176004	-2.00256	0.0452244	0.35048	Atp2b2
158.338	0.360311	0.334575	1.07692	0.281514	0.750901	Atp2b3
154.647	-1.1326	0.348606	-3.24896	0.00115829	0.046254	Atp2b4
243.463	0.57416	0.213208	2.69296	0.0070821	0.133345	Atp2c1
921.268	-0.213391	0.166158	-1.28427	0.199047	0.663707	Atp5a1
1318.86	0.154262	0.113026	1.36484	0.172303	0.628905	Atp5b
1131.42	0.164647	0.143039	1.15106	0.249707	0.720786	Atp5c1
573.692	-0.396426	0.175767	-2.25541	0.0241073	0.25532	Atp5d
974.154	0.0319233	0.122058	0.261543	0.793674	0.972996	Atp5e
1335.77	-0.0659636	0.112828	-0.584637	0.558792	0.910783	Atp5f1
1027.54	0.208249	0.117532	1.77185	0.0764202	0.447909	Atp5g1
14.0965	-0.535953	1.18957	-0.450544	0.652318	0.942439	Atp5g2
970.15	0.201977	0.118657	1.70219	0.0887192	0.477047	Atp5g3
1817.71	0.0165966	0.141844	0.117006	0.906856	0.985994	Atp5h
1512.02	0.0783262	0.140999	0.55551	0.578546	0.916421	Atp5j
2409.96	0.116248	0.0983559	1.18191	0.237241	0.70778	Atp5j2
2095.57	0.194605	0.121504	1.60163	0.109237	0.519495	Atp5k
953.957	0.239359	0.165787	1.44378	0.148802	0.595163	Atp5l
3226.79	0.110099	0.102586	1.07323	0.283166	0.751919	Atp5o
60.2252	-0.315343	0.615464	-0.512366	0.608395	0.92821	Atp5s
25.4355	0.396764	0.857721	0.462579	0.643666	0.939118	Atp5sl
71.9963	1.08288	0.453696	2.3868	0.0169956	0.213334	Atp6ap1
6.14864	0.625631	3.06387	0.204196	0.8382	0.979785	Atp6ap1l
404.793	-0.0681128	0.222551	-0.306055	0.759563	0.965121	Atp6ap2
239.696	-0.200697	0.217919	-0.92097	0.357066	0.809776	Atp6v0a1
69.3765	-0.127625	0.499174	-0.255673	0.798203	0.973436	Atp6v0a2
1116.61	0.396155	0.123293	3.21312	0.00131303	0.0491986	Atp6v0b
335.355	-0.367364	0.217977	-1.68533	0.0919248	0.483517	Atp6v0d1
274.997	0.972855	0.205991	4.7228	2.32618e-06	0.000536091	Atp6v0e
218.343	-0.0459288	0.247229	-0.185774	0.852622	0.980573	Atp6v0e2
1303.2	0.0898186	0.121449	0.739558	0.459568	0.869854	Atp6v1a
817.775	-0.0912768	0.129098	-0.707038	0.479543	0.879678	Atp6v1b2
748.932	0.0651492	0.154245	0.422374	0.672752	0.946557	Atp6v1c1
1500.59	-0.166082	0.108989	-1.52383	0.12755	0.556096	Atp6v1d
1311.81	0.054804	0.118769	0.461433	0.644488	0.939328	Atp6v1e1
1276.55	0.092349	0.154922	0.596098	0.55111	0.906956	Atp6v1f
569.622	0.180741	0.155833	1.15984	0.246115	0.717189	Atp6v1g1
436.272	-0.837654	0.220371	-3.8011	0.000144053	0.0121163	Atp6v1g2
440.921	0.276567	0.173694	1.59226	0.111325	0.521851	Atp6v1h
14.9866	-0.890575	1.87284	-0.47552	0.634416	0.934872	Atp7a
675.122	0.869774	0.15454	5.62815	1.82157e-08	9.54089e-06	Atp8a1
40.8167	-0.665153	1.06266	-0.625932	0.531359	0.89837	Atp8a2
10.3845	-2.89328	1.66547	-1.73721	0.0823493	0.462881	Atp8b2
247.04	0.00298559	0.28151	0.0106056	0.991538	0.998976	Atp9a
66.9953	-1.95463	0.566046	-3.45314	0.000554108	0.0286528	Atp9b
22.7233	-1.71591	0.857938	-2.00004	0.0454965	0.351378	Atpaf1
30.2961	0.406766	0.911742	0.446142	0.655495	0.943482	Atpaf2
2048.93	0.0584939	0.136699	0.427904	0.668721	0.946419	Atpif1
8.05857	-1.13053	2.24566	-0.503429	0.614663	0.930171	Atr
240.822	-0.521975	0.243739	-2.14153	0.0322311	0.295465	Atraid
130.563	0.686083	0.29478	2.32744	0.019942	0.232444	Atrip
99.1065	0.632755	0.35685	1.77317	0.0762006	0.447362	Atrn
64.6665	-0.266958	0.43091	-0.619523	0.535572	0.900277	Atrnl1
825.837	0.168706	0.169706	0.994108	0.32017	0.782365	Atrx
336.249	0.232729	0.306085	0.76034	0.447051	0.862903	Atxn1
665.642	0.244429	0.178295	1.37092	0.170399	0.627566	Atxn10
8.18667	2.99615	1.80225	1.66245	0.0964225	0.492717	Atxn1l
131.069	0.285106	0.338536	0.842173	0.399691	0.839931	Atxn2
39.9744	0.0397401	0.539957	0.0735986	0.94133	0.992669	Atxn2l
84.6757	-0.841914	0.415819	-2.02471	0.0428971	0.342078	Atxn3
43.9501	1.24493	0.632484	1.96831	0.0490322	0.362876	Atxn7
19.9916	0.521284	0.955879	0.545345	0.585516	0.919948	Atxn7l1
5.93282	-0.243152	2.64483	-0.0919349	0.92675	0.989403	Atxn7l2
75.3021	-0.101848	0.645572	-0.157764	0.874643	0.980573	Atxn7l3
921.278	-0.548663	0.180105	-3.04635	0.00231641	0.0689716	Atxn7l3b
37.3634	1.29174	0.881409	1.46554	0.142773	0.58464	AU019823
40.208	1.10567	0.589621	1.87523	0.0607616	0.40262	AU022252
40.0268	-1.00309	0.616265	-1.6277	0.103589	0.506619	AU040320
79.0768	0.694662	0.546526	1.27105	0.203711	0.669264	AU041133
117.109	-0.281844	0.474715	-0.593713	0.552704	0.908014	Auh
38.7284	-1.49067	0.660215	-2.25786	0.0239543	0.254636	Aup1
398.028	0.163368	0.232757	0.701881	0.482753	0.881428	Aurkaip1
88.8586	0.169964	0.347885	0.488564	0.625151	0.932592	Auts2
16.9932	-1.17629	0.998846	-1.17765	0.238935	0.708686	Aven
100.766	1.01991	0.446873	2.28233	0.0224698	0.246206	Avl9
174.575	-0.423108	0.280359	-1.50916	0.131257	0.562431	Avpi1
5.92125	-0.358362	3.1572	-0.113506	0.909629	0.986716	AW046200
46.6718	0.752963	0.58224	1.29322	0.195936	0.660939	AW146154
57.1554	0.443132	0.508966	0.870652	0.383944	0.83099	AW209491
17.7018	1.14438	1.32247	0.865341	0.386852	0.832462	AW495222
110.04	0.0764592	0.519949	0.147051	0.883092	0.981128	AW549877
11.6743	-3.3065	1.70913	-1.93461	0.0530381	0.375999	AW551984
26.4407	-2.01281	0.738578	-2.72525	0.00642531	0.127009	AW554918
16.973	-0.381801	1.49077	-0.256109	0.797867	0.973406	Axin1
25.0125	-0.774711	1.13158	-0.68463	0.493577	0.884387	Axin2
13.8316	-0.631639	1.10938	-0.56936	0.569112	0.913037	Axl
183.776	-0.489759	0.277831	-1.76279	0.0779352	0.449923	Azi2
218.874	-0.0605525	0.28181	-0.21487	0.829869	0.978307	Azin1
15.9045	-1.66321	1.72316	-0.965211	0.334439	0.794128	Azin2
7.67197	-0.109857	1.95158	-0.0562911	0.95511	0.995088	B130034C11Rik
159.763	0.663664	0.273772	2.42415	0.0153442	0.201541	B230118H07Rik
155.029	-0.298855	0.316986	-0.942802	0.345782	0.802517	B230209E15Rik
12.1619	2.94591	1.47118	2.00242	0.0452401	0.35048	B230216N24Rik
122.427	-0.35661	0.514345	-0.693327	0.488104	0.883094	B230217C12Rik
18.6414	0.613582	0.982086	0.624774	0.532119	0.89837	B230217O12Rik
566.109	-0.348408	0.154396	-2.25659	0.0240336	0.255244	B230219D22Rik
26.0767	-0.423793	0.702898	-0.602923	0.54656	0.905979	B230307C23Rik
39.384	-0.444146	0.642481	-0.691298	0.489379	0.883094	B230354K17Rik
302.853	0.50926	0.264744	1.9236	0.0544052	0.380638	B2m
101.439	1.02013	0.446166	2.28643	0.0222292	0.245117	B3galnt1
10.7373	-0.100341	1.35287	-0.0741689	0.940876	0.992649	B3galnt2
154.991	0.396945	0.353411	1.12318	0.261361	0.731273	B3galt1
332.527	-0.127532	0.235335	-0.541914	0.587877	0.921086	B3galt2
84.5707	0.625505	0.479512	1.30446	0.192076	0.655789	B3galt5
11.6327	-1.88778	1.20018	-1.57292	0.115737	0.530074	B3galt6
112.133	-0.310044	0.451039	-0.6874	0.491831	0.883487	B3gat1
10.129	0.434136	1.87639	0.231368	0.817029	0.976123	B3gat2
71.7957	-0.727996	0.71791	-1.01405	0.310559	0.777384	B3gat3
38.6022	-0.721224	0.8486	-0.849899	0.395381	0.836727	B3glct
59.9882	-0.303029	0.716483	-0.422939	0.67234	0.946557	B3gnt2
6.84529	-5.75498	2.86479	-2.00887	0.0445512	0.348752	B3gnt7
6.12527	-3.14657	2.10991	-1.49133	0.135874	0.570437	B3gnt9
6.01448	-1.33517	2.66508	-0.500986	0.616381	0.930385	B3gntl1
44.6987	-0.474094	0.529667	-0.89508	0.370744	0.819349	B4galnt1
13.8865	-0.558354	1.12119	-0.498002	0.618482	0.931427	B4galnt4
18.7523	4.26797	1.09799	3.88708	0.000101459	0.00955437	B4galt1
38.748	0.0204983	0.68622	0.0298713	0.97617	0.997774	B4galt2
23.3251	0.210955	0.925272	0.227992	0.819653	0.976313	B4galt3
33.6526	0.110087	0.676878	0.16264	0.870802	0.980573	B4galt4
7.21819	0.0018798	1.72143	0.00109199	0.999129	0.999907	B4galt5
186.377	0.172163	0.258223	0.666723	0.504949	0.888865	B4galt6
47.8648	-0.0535104	0.639506	-0.0836746	0.933315	0.990027	B4gat1
67.9195	0.303841	0.491772	0.617849	0.536675	0.900767	B630005N14Rik
38.2243	1.31462	0.706365	1.86111	0.0627285	0.408604	B630019K06Rik
6.6393	4.74888	2.44085	1.94558	0.051705	0.373013	B830017H08Rik
5.8706	-2.9748	1.93988	-1.5335	0.125154	0.550206	B930041F14Rik
53.8996	1.33315	0.535985	2.48728	0.0128723	0.182959	B9d1
29.9695	0.948773	0.648399	1.46326	0.143398	0.586562	B9d2
226.312	-0.46032	0.306438	-1.50216	0.133055	0.565129	Baalc
116.341	-0.551944	0.382183	-1.44419	0.148686	0.595163	Babam1
82.7924	-0.272266	0.573926	-0.474392	0.63522	0.934872	Bace1
12.9674	-1.06074	1.71884	-0.617122	0.537154	0.900939	Bace2
29.3512	-0.950589	0.778787	-1.2206	0.222237	0.692764	Bach1
34.1754	0.934328	1.96263	0.476059	0.634032	0.934872	Bach2
59.1541	0.225807	0.52935	0.426573	0.66969	0.946419	Bad
465.102	-0.22816	0.183605	-1.24266	0.213992	0.681923	Bag1
11.2048	-2.57031	1.79369	-1.43298	0.151864	0.599293	Bag2
313.024	0.0453606	0.323273	0.140316	0.88841	0.98279	Bag4
125.776	0.29861	0.407559	0.732679	0.463754	0.872606	Bag5
112.697	-0.288668	0.327583	-0.881207	0.378206	0.825774	Bag6
12.1225	-1.2034	1.90761	-0.630843	0.528143	0.89661	Bahcc1
18.0461	-1.02316	0.883548	-1.15801	0.24686	0.717189	Bahd1
205.656	-0.877867	0.278453	-3.15266	0.0016179	0.0559851	Baiap2
5.07727	-5.32267	2.54576	-2.0908	0.0365458		Baiap3
44.6352	-0.835197	0.69272	-1.20568	0.227942	0.700981	Bambi
291.691	-0.14736	0.226122	-0.651683	0.514606	0.890896	Banf1
5.97085	-1.14656	2.14591	-0.534298	0.593135	0.92286	Bank1
68.6785	0.109801	0.422269	0.260027	0.794843	0.973273	Banp
37.9058	0.348414	0.644592	0.540518	0.58884	0.921086	Bap1
1072.17	0.348711	0.161427	2.16017	0.0307594	0.289815	Basp1
10.3267	1.67999	2.06669	0.812893	0.416279	0.849741	Batf3
19.5263	-0.213636	1.06925	-0.1998	0.841637	0.9804	Bax
8.99642	2.46965	1.76839	1.39655	0.162549	0.618577	Baz1a
239.995	0.629761	0.305991	2.0581	0.0395803	0.327882	Baz1b
58.9959	0.0402668	0.439581	0.0916027	0.927014	0.989403	Baz2a
97.7661	0.0580688	0.444127	0.130748	0.895975	0.983906	Baz2b
6.89602	0.662855	2.9549	0.224324	0.822505	0.976504	BB557941
7.88179	0.250488	1.55158	0.161441	0.871746	0.980573	Bbc3
302.62	0.922712	0.290965	3.17121	0.00151804	0.0541559	Bbip1
10.7012	0.934596	1.58855	0.588335	0.556308	0.910301	Bbox1
13.5278	0.432189	1.47122	0.293763	0.768939	0.968206	Bbs1
7.17406	-5.82154	2.23306	-2.60697	0.00913466	0.153771	Bbs10
14.0085	1.63238	1.88339	0.866725	0.386093	0.831971	Bbs12
24.2273	1.38464	1.312	1.05537	0.291258	0.760252	Bbs2
159.879	-0.409495	0.305871	-1.33878	0.180642	0.640923	Bbs4
12.6092	-1.21379	1.21751	-0.99694	0.318794	0.781007	Bbs5
28.7952	-1.18091	0.716736	-1.64762	0.0994316	0.498584	Bbs7
9.98526	-1.51258	1.85311	-0.816242	0.414362	0.848761	Bbs9
55.3373	0.710294	0.497733	1.42706	0.153563	0.600409	Bbx
49.9714	0.770556	0.731568	1.05329	0.292206	0.761269	BC002163
273.275	0.507989	0.244223	2.08002	0.0375235	0.318815	BC003331
118.525	0.510803	0.400299	1.27606	0.201936	0.66803	BC003965
187.364	-0.129754	0.23792	-0.545369	0.5855	0.919948	BC004004
103.204	-0.360277	0.369245	-0.975713	0.329207	0.791901	BC005537
99.2079	0.522681	0.396113	1.31953	0.186993	0.650189	BC005561
160.172	0.229236	0.251617	0.911048	0.36227	0.81373	BC005624
8.58075	2.16808	1.85848	1.16659	0.243375	0.714569	BC017158
29.9239	0.526684	0.942671	0.558715	0.576356	0.916257	BC017643
20.6709	-0.227959	0.980754	-0.232433	0.816202	0.976123	BC022687
17.8917	0.747053	0.942381	0.79273	0.427935	0.856457	BC023829
4.88611	-2.16668	2.9596	-0.732086	0.464116		BC024978
36.6418	-1.17719	0.651949	-1.80564	0.0709739	0.433633	BC029214
77.8614	0.0174789	0.462179	0.0378184	0.969832	0.997667	BC029722
172.38	0.370172	0.302588	1.22335	0.221196	0.691119	BC030336
82.9032	2.27	0.583179	3.89245	9.92367e-05	0.00952358	BC030500
464.162	-0.0842115	0.230742	-0.36496	0.715141	0.955509	BC031181
10.6698	1.75887	1.38415	1.27072	0.203828	0.669264	BC031361
13.3996	-0.659617	1.51685	-0.434859	0.663665	0.946271	BC037034
12.0373	-0.339933	1.64411	-0.206757	0.836199	0.979419	BC048403
80.7844	0.11433	0.355025	0.322035	0.747426	0.963255	BC048546
15.077	-1.71449	1.12434	-1.52488	0.127289	0.555376	BC052040
13.0298	0.102434	1.15698	0.0885353	0.929451	0.989924	BC064078
5.99281	5.55414	2.29592	2.41914	0.0155574	0.203252	BC065397
14.9973	-1.56429	1.35491	-1.15453	0.248284	0.71956	BC068281
13.9135	0.812462	1.01061	0.803931	0.421437	0.853387	Bc1
74.5127	-0.233187	0.517791	-0.450349	0.652459	0.942439	Bcan
285.041	0.623569	0.297315	2.09734	0.0359637	0.312526	Bcap29
280.285	-0.0395232	0.265724	-0.148738	0.88176	0.981051	Bcap31
39.7256	-1.26608	0.878536	-1.44112	0.149551	0.596496	Bcar1
35.2006	0.867804	0.995918	0.871361	0.383557	0.830869	Bcas1
137.766	0.296292	0.434694	0.68161	0.495486	0.884928	Bcas2
47.3595	0.0941638	0.581971	0.161802	0.871462	0.980573	Bcas3
68.769	0.39231	0.490608	0.799641	0.423919	0.854614	Bcat1
189.735	0.0487345	0.284665	0.171199	0.864067	0.980573	Bccip
7.42546	-0.767753	2.02036	-0.380008	0.703939	0.953861	Bcdin3d
7.13129	-1.57723	2.61875	-0.602281	0.546987	0.905979	Bche
17.9919	-0.574462	1.12417	-0.51101	0.609344	0.92821	Bckdha
87.8466	0.426559	0.496929	0.85839	0.390677	0.833199	Bckdhb
66.1695	-0.849509	0.62799	-1.35274	0.176138	0.634252	Bckdk
19.7833	-0.371527	0.826644	-0.449441	0.653114	0.942439	Bcl10
195.27	0.610715	0.355804	1.71644	0.086082	0.470775	Bcl11a
440.443	0.505851	0.182435	2.77277	0.00555805	0.116446	Bcl11b
29.4413	0.593915	0.73684	0.80603	0.420225	0.85281	Bcl2
8.34935	-6.04317	2.67389	-2.26007	0.0238172	0.253647	Bcl2a1b
91.1987	-0.477728	0.378203	-1.26315	0.206534	0.671761	Bcl2l1
6.61008	2.21628	1.8992	1.16696	0.243228	0.714569	Bcl2l11
41.9011	-0.330841	0.662077	-0.499702	0.617285	0.931018	Bcl2l13
46.0394	-1.41084	0.811596	-1.73835	0.0821487	0.462422	Bcl2l2
32.6861	0.635919	0.679256	0.936199	0.349171	0.803895	Bcl6
133.547	0.0688967	0.403117	0.17091	0.864295	0.980573	Bcl7a
94.6368	0.211659	0.376546	0.562106	0.574043	0.916124	Bcl7b
17.1089	-0.228286	0.915941	-0.249237	0.803178	0.974315	Bcl7c
51.1908	-0.121251	0.539237	-0.224857	0.822091	0.976504	Bcl9
16.1044	-1.60813	1.16032	-1.38593	0.165768	0.623414	Bcl9l
399.863	0.417423	0.18736	2.22792	0.0258858	0.262883	Bclaf1
26.2894	0.0756443	1.22702	0.0616488	0.950843	0.99338	Bcor
15.3729	-1.49799	1.70662	-0.877754	0.380077	0.827334	Bcorl1
57.3255	-2.17186	0.662297	-3.27928	0.00104072	0.0431374	Bcr
13.6524	0.608609	1.53747	0.395852	0.692214	0.949131	Bcs1l
11.8399	-0.752772	1.13646	-0.662382	0.507726	0.889387	Bdh1
9.74666	-4.73713	2.37314	-1.99614	0.0459184	0.353216	Bdh2
342.771	-0.231165	0.278847	-0.829003	0.407103	0.844826	Bdnf
138.057	0.466446	0.304398	1.53235	0.125435	0.550206	Bdp1
10.6039	-0.750246	1.74727	-0.429381	0.667646	0.946419	Bean1
107.861	-0.233352	0.37563	-0.621229	0.534449	0.899571	Becn1
33.3649	-1.13052	0.675532	-1.67353	0.0942233	0.48644	Begain
5.2576	-1.49634	2.66326	-0.561844	0.574222		Bend3
23.0201	-1.48117	0.827938	-1.78899	0.0736163	0.43998	Bend4
28.5839	1.44882	0.912478	1.58779	0.112335	0.524102	Bend5
529.54	-0.212834	0.191617	-1.11073	0.266685	0.7358	Bend6
10.1025	2.70714	1.6876	1.60414	0.108684	0.51815	Bend7
71.7805	-0.139994	0.408394	-0.342791	0.731755	0.960219	Bet1
239.19	-0.0654199	0.235736	-0.277514	0.781386	0.970348	Bet1l
94.5325	-1.09185	0.668983	-1.6321	0.102658	0.504448	Bex1
894.497	-0.319568	0.162597	-1.9654	0.0493684	0.364661	Bex2
52.8424	-2.04924	0.548319	-3.73732	0.000185992	0.013827	Bex4
55.413	0.270406	0.528768	0.511389	0.609079	0.92821	Bfar
10.9032	0.0318283	1.81178	0.0175674	0.985984	0.998076	Bfsp2
7.56623	0.654086	2.10962	0.310049	0.756524	0.963255	Bgn
114.088	0.221524	0.347483	0.637511	0.523792	0.895547	Bhlhb9
112.907	0.613494	0.33785	1.81588	0.069389	0.429184	Bhlhe22
111.537	-0.011119	0.569861	-0.0195118	0.984433	0.997964	Bhlhe40
238.815	1.10859	0.377845	2.93397	0.00334659	0.0860584	Bhlhe41
14.8115	0.0651674	1.94081	0.0335773	0.973214	0.997667	Bicc1
233.374	-0.060093	0.242203	-0.24811	0.804049	0.974621	Bicd1
64.4398	0.267793	0.552618	0.484591	0.627967	0.933511	Bicd2
8.79578	1.24895	1.86019	0.671413	0.501957	0.888078	Bid
257.692	-0.441461	0.290074	-1.52189	0.128036	0.556556	Bin1
20.599	0.895479	0.995309	0.8997	0.36828	0.81773	Bin3
79.5075	1.01876	0.482209	2.11269	0.0346277	0.306699	Birc2
721.661	0.799601	0.199925	3.9995	6.34765e-05	0.00671046	Birc6
62.8949	0.76051	0.496037	1.53317	0.125234	0.550206	Bivm
147.582	-0.225023	0.352259	-0.6388	0.522953	0.895547	Blcap
18.0973	-1.3222	1.72128	-0.768151	0.442398	0.862245	Blm
99.3292	-0.318785	0.40583	-0.785514	0.432152	0.857728	Blmh
6.99349	-0.983256	1.92051	-0.511976	0.608668	0.92821	Blnk
478	0.103974	0.184688	0.562971	0.573455	0.915588	Bloc1s1
83.821	-0.251481	0.643482	-0.390813	0.695935	0.951164	Bloc1s2
15.7277	-2.4993	1.11814	-2.23523	0.0254021	0.260703	Bloc1s3
31.4632	0.213441	0.728734	0.292893	0.769604	0.968206	Bloc1s4
23.3332	0.382414	0.906436	0.421888	0.673107	0.946557	Bloc1s5
61.8381	-1.54384	0.525906	-2.93558	0.00332923	0.0858226	Bloc1s6
115.048	-0.262371	0.577912	-0.453998	0.64983	0.941883	Blvra
65.2252	0.0164221	0.477254	0.0344096	0.972551	0.997667	Blvrb
57.0645	-0.276717	0.510451	-0.542104	0.587747	0.921068	Blzf1
120.83	0.0896578	0.444249	0.201819	0.840058	0.9804	Bmi1
8.71442	1.05801	2.20583	0.479642	0.631482	0.934484	Bmp1
6.15105	-1.77933	2.00312	-0.888278	0.374391	0.824085	Bmp2
56.6329	-0.0925894	0.443192	-0.208915	0.834515	0.978989	Bmp2k
12.6902	1.07258	1.78781	0.599943	0.548544	0.905979	Bmp3
109.044	0.0971978	0.391374	0.24835	0.803863	0.974621	Bmpr1a
41.8059	0.969867	0.6259	1.54956	0.121248	0.542117	Bmpr1b
585.252	0.437222	0.183388	2.38414	0.017119	0.214047	Bmpr2
42.3551	1.07165	0.676337	1.58449	0.113082	0.524471	Bms1
194.322	-0.231686	0.246658	-0.939301	0.347576	0.802951	Bmyc
6.61584	-5.70315	3.54625	-1.60822	0.107787	0.516941	Bnc2
10.5193	-2.17798	1.27839	-1.70369	0.0884383	0.475981	Bnip1
56.3822	-0.369495	0.539913	-0.68436	0.493748	0.884555	Bnip2
253.14	-0.590431	0.30538	-1.93343	0.0531832	0.376431	Bnip3
353.836	0.289006	0.210503	1.37293	0.169775	0.626822	Bnip3l
20.7764	-2.02843	3.20049	-0.633789	0.526218	0.895862	Boc
139.683	0.235123	0.378275	0.621566	0.534227	0.899571	Bod1
360.319	-0.147827	0.193557	-0.763741	0.445022	0.862627	Bod1l
128.914	0.165288	0.367196	0.450136	0.652612	0.942439	Bok
208.222	-0.160731	0.310939	-0.516922	0.605211	0.927715	Bola1
486.933	-0.0157973	0.158799	-0.0994799	0.920757	0.988437	Bola2
209.795	0.196818	0.33206	0.592718	0.55337	0.908417	Bola3
35.5177	-1.56523	0.818066	-1.91333	0.0557054	0.384828	Bop1
56.3811	-0.608238	0.489828	-1.24174	0.214333	0.68243	Bpgm
62.945	-0.154846	0.4956	-0.312441	0.754705	0.963255	Bphl
59.5859	0.330787	0.531429	0.622448	0.533647	0.899336	Bpnt1
283.94	0.425744	0.251857	1.69042	0.0909478	0.482279	Bptf
551.952	0.0449331	0.234709	0.191442	0.848179	0.9804	Braf
87.6552	-0.00296365	0.473415	-0.00626015	0.995005	0.999803	Brap
11.9614	-0.28711	1.34825	-0.21295	0.831366	0.978532	Brat1
7.08157	-0.469348	2.46086	-0.190726	0.84874	0.9804	Brca1
14.7321	-0.688997	1.23777	-0.556643	0.577771	0.916257	Brca2
409.195	0.0471444	0.213411	0.220908	0.825164	0.97682	Brcc3
141.403	0.471245	0.285825	1.64872	0.0992045	0.498564	Brd1
175.704	0.244763	0.369623	0.662198	0.507845	0.889387	Brd2
178.41	-0.730831	0.36294	-2.01364	0.0440473	0.347166	Brd3
115.79	-0.645364	0.348235	-1.85324	0.0638479	0.412	Brd4
114.961	0.54857	0.454568	1.20679	0.227512	0.700032	Brd7
284.303	-0.335884	0.197585	-1.69995	0.0891408	0.477776	Brd8
262.503	-0.321272	0.230363	-1.39463	0.163127	0.619643	Brd9
25.7128	0.37612	0.721906	0.52101	0.60236	0.927429	Brdt
87.9142	0.136656	0.339096	0.403003	0.686946	0.948542	Bre
36.2027	-0.485127	0.647444	-0.749295	0.453679	0.866676	Brf1
6.43515	-4.12572	2.23327	-1.84739	0.0646912	0.414592	Brf2
30.5822	-0.00125	0.755909	-0.00165364	0.998681	0.999803	Bri3
153.357	0.239606	0.318333	0.752689	0.451637	0.865781	Bri3bp
154.963	-0.491372	0.354209	-1.38724	0.165369	0.623049	Brinp1
80.8538	-0.663835	0.4411	-1.50496	0.132336	0.563527	Brinp2
32.7295	-0.928228	0.898247	-1.03338	0.301427	0.770985	Brinp3
7.88933	0.662865	2.31224	0.286676	0.77436	0.969075	Brip1os
119.669	1.11711	0.52381	2.13266	0.0329526	0.299458	Brix1
286.553	0.22245	0.252272	0.881787	0.377892	0.825774	Brk1
41.1971	0.210463	0.666064	0.315981	0.752017	0.963255	Brms1
86.3491	-0.367485	0.431682	-0.851286	0.39461	0.836705	Brms1l
60.875	0.130964	0.437595	0.29928	0.764726	0.966165	Brox
30.9713	0.401364	2.02036	0.19866	0.842529	0.9804	Brpf1
16.1878	0.23949	1.4444	0.165806	0.86831	0.980573	Brpf3
71.9515	-0.277078	0.478158	-0.57947	0.562272	0.911987	Brsk1
115.084	0.342763	0.502333	0.682342	0.495023	0.884928	Brsk2
147.177	-0.123162	0.270713	-0.454953	0.649143	0.941708	Brwd1
13.478	0.748477	1.52236	0.491654	0.622964	0.932197	Brwd3
148.224	-1.61236	0.408038	-3.95149	7.76649e-05	0.00785029	Bscl2
24.0391	-0.8024	0.85089	-0.943012	0.345675	0.802517	Bsdc1
1028	0.00583838	0.152826	0.0382028	0.969526	0.997667	Bsg
171.622	0.301549	0.385317	0.782601	0.433862	0.858523	Bsn
100.463	-0.43835	1.06508	-0.411564	0.680659	0.947938	Btaf1
173.329	0.0979663	0.308895	0.317151	0.751129	0.963255	Btbd1
104.159	-0.295391	0.376717	-0.784119	0.43297	0.858203	Btbd10
14.8615	1.36683	1.1599	1.1784	0.238637	0.708558	Btbd11
53.3951	0.276565	0.504978	0.547677	0.583914	0.919323	Btbd17
38.412	-0.15424	0.553836	-0.278494	0.780634	0.970348	Btbd2
654.548	0.01061	0.204088	0.0519871	0.958539	0.996054	Btbd3
38.4227	-1.01722	0.600053	-1.69521	0.090035	0.479722	Btbd6
26.7351	0.586295	1.29889	0.45138	0.651716	0.942439	Btbd7
32.3503	-0.599896	2.07466	-0.289154	0.772463	0.968808	Btbd8
109.37	-0.0169262	0.487746	-0.0347028	0.972317	0.997667	Btbd9
146.821	0.487823	0.290512	1.67918	0.0931168	0.484091	Btf3
64.7095	0.670113	0.485576	1.38004	0.167575	0.625718	Btf3l4
71.414	-0.240373	0.485463	-0.495143	0.620499	0.931462	Btg1
12.1942	-2.61294	1.42064	-1.83927	0.0658759	0.418461	Btg2
124.756	-0.613675	0.302263	-2.03027	0.0423294	0.340378	Btrc
164.556	0.36551	0.288668	1.2662	0.205443	0.670718	Bub3
5.37175	-0.883294	2.28495	-0.38657	0.699074		Bud13
185.998	0.636284	0.400695	1.58795	0.112298	0.524102	Bud31
5.91344	-2.19744	2.55486	-0.860101	0.389733	0.833112	Bvht
28.5093	-0.325216	0.967273	-0.33622	0.736705	0.962316	Bysl
23.0806	-0.948459	1.07615	-0.881347	0.37813	0.825774	Bzrap1
463.207	0.19603	0.202192	0.969525	0.332283	0.793226	Bzw1
142.553	0.775576	0.426254	1.81952	0.0688328	0.426652	Bzw2
15.0736	-0.995252	1.36767	-0.727698	0.466798	0.87391	C030018K13Rik
13.3965	-0.574456	1.4247	-0.403212	0.686792	0.948542	C030023E24Rik
36.9992	-1.89532	0.806246	-2.35079	0.0187335	0.224861	C030029H02Rik
6.72385	-0.521669	2.63542	-0.197946	0.843088	0.9804	C030034I22Rik
10.5632	-0.269191	1.58944	-0.169362	0.865512	0.980573	C030037D09Rik
22.844	-0.418802	0.839393	-0.498935	0.617825	0.931427	C030039L03Rik
24.2245	0.596033	0.811864	0.734155	0.462855	0.872053	C130030K03Rik
17.9458	-0.103377	0.976909	-0.10582	0.915725	0.987646	C130036L24Rik
31.1332	1.31675	0.872831	1.5086	0.131402	0.562431	C130071C03Rik
302.147	-0.0330893	0.256079	-0.129215	0.897187	0.983906	C1d
13.8355	-1.00508	1.27418	-0.788805	0.430226	0.857339	C1galt1
79.0669	-0.254182	0.361423	-0.703281	0.481881	0.880804	C1galt1c1
98.0592	0.3134	0.382639	0.819048	0.412759	0.848369	C1qa
149.006	0.786872	0.261432	3.00985	0.00261374	0.0741461	C1qb
139.105	-0.18467	0.393711	-0.46905	0.639034	0.93648	C1qbp
230.719	0.1027	0.390317	0.263119	0.792459	0.972925	C1qc
10.0355	-6.3089	2.17031	-2.90691	0.0036502	0.0904543	C1ql1
25.4182	0.853316	0.79006	1.08007	0.280113	0.748896	C1ql2
360.927	0.499973	0.235423	2.12372	0.0336934	0.302323	C1ql3
299.654	-0.312733	0.256809	-1.21777	0.223313	0.694512	C1qtnf4
40.2966	-0.393476	0.72673	-0.541433	0.588209	0.921086	C230004F18Rik
9.55079	0.747357	1.67007	0.447501	0.654513	0.942905	C230037L18Rik
10.0647	2.41082	2.14602	1.12339	0.261272	0.731273	C230072F16Rik
52.6774	0.408893	0.451761	0.905111	0.365407	0.815737	C230091D08Rik
10.5005	0.477773	1.7216	0.277518	0.781383	0.970348	C2cd2
94.7513	-1.08285	0.507045	-2.13561	0.0327112	0.298205	C2cd2l
21.4437	0.337943	1.31814	0.256378	0.797659	0.973406	C2cd3
8.62064	0.0638325	1.90488	0.03351	0.973268	0.997667	C2cd4c
40.7504	-0.709914	0.641998	-1.10579	0.268818	0.736573	C2cd5
35.5212	-0.255633	0.603539	-0.423558	0.671889	0.946557	C330006A16Rik
48.8855	-0.369946	0.561518	-0.658832	0.510004	0.890526	C330007P06Rik
6.68629	-5.71771	2.92085	-1.95755	0.0502832	0.367881	C330013E15Rik
35.0628	0.389867	0.608996	0.640181	0.522055	0.895082	C330018D20Rik
14.6133	1.76849	1.5183	1.16478	0.244106	0.715371	C330027C09Rik
21.1692	-0.76799	1.14546	-0.670463	0.502563	0.88816	C4b
8.26322	3.35021	2.066	1.6216	0.10489	0.508689	C530005A16Rik
52.3144	0.0806383	0.481829	0.167359	0.867088	0.980573	C530008M17Rik
48.4373	0.898855	0.545737	1.64705	0.0995484	0.498584	C630043F03Rik
18.2185	0.491476	0.821828	0.598028	0.549821	0.906524	C77080
352.826	0.167726	0.256493	0.653919	0.513164	0.890876	C77370
37.6422	-0.120598	0.619995	-0.194514	0.845773	0.9804	C87436
6.41572	-1.00937	2.07633	-0.486132	0.626874	0.93326	C920006O11Rik
8.01274	-0.722001	1.49121	-0.484171	0.628264	0.93361	C920021L13Rik
46.787	-1.00767	0.557901	-1.80618	0.0708909	0.433374	Caap1
428.351	-0.231181	0.255123	-0.906153	0.364855	0.815562	Cab39
85.6076	0.23634	0.487202	0.485096	0.627608	0.933511	Cab39l
47.0145	-1.22404	0.737631	-1.65942	0.0970311	0.493856	Cabin1
12.9051	0.403701	1.33678	0.301995	0.762656	0.965145	Cables1
18.6475	0.759313	0.990035	0.766956	0.443108	0.862245	Cables2
77.6564	0.0324893	0.585602	0.0554802	0.955756	0.99523	Cabp1
43.2255	0.79668	1.78762	0.445665	0.655839	0.943482	Cacfd1
16.5789	-2.76267	1.26626	-2.18175	0.0291279	0.281477	Cachd1
90.1318	0.254468	0.347639	0.73199	0.464175	0.87269	Cacna1a
51.4302	1.02886	0.682858	1.50669	0.13189	0.563502	Cacna1b
59.4797	-0.649642	0.544973	-1.19206	0.233236	0.705784	Cacna1c
53.7873	0.442285	0.488276	0.905809	0.365037	0.815665	Cacna1d
90.2116	-0.331637	0.489479	-0.67753	0.49807	0.887057	Cacna1e
16.0353	3.16149	1.19805	2.63885	0.00831873	0.145679	Cacna1g
16.6451	0.593742	1.57262	0.37755	0.705765	0.954443	Cacna1h
17.9659	0.529444	1.07501	0.492499	0.622366	0.932197	Cacna1i
497.856	0.289023	0.174087	1.66022	0.0968703	0.493691	Cacna2d1
11.8514	-0.177911	1.38431	-0.128519	0.897738	0.983906	Cacna2d2
126.242	-1.30898	0.370301	-3.5349	0.000407923	0.0235431	Cacna2d3
23.1812	-0.160714	0.828802	-0.193911	0.846246	0.9804	Cacnb1
30.6077	-0.971777	0.638933	-1.52094	0.128276	0.556556	Cacnb2
67.6391	0.930993	0.464967	2.00228	0.0452547	0.35048	Cacnb3
395.409	-0.115246	0.223512	-0.515616	0.606123	0.927715	Cacnb4
81.8634	-0.00924037	0.485628	-0.0190277	0.984819	0.997964	Cacng2
51.3794	-0.266091	0.642108	-0.414402	0.67858	0.947938	Cacng3
12.0155	-1.18217	1.79792	-0.657521	0.510846	0.89065	Cacng5
18.1982	-0.0573435	4.17664	-0.0137296	0.989046	0.998557	Cacng8
81.2377	-0.22505	0.443519	-0.507419	0.611861	0.929053	Cacul1
617.296	0.036798	0.144903	0.25395	0.799534	0.973512	Cacybp
12.7527	-5.21425	2.23773	-2.33015	0.0197981	0.23164	Cad
588.538	-0.136181	0.154514	-0.881352	0.378127	0.825774	Cadm1
1061.14	0.31287	0.153172	2.0426	0.0410924	0.334871	Cadm2
85.2684	0.17524	0.422815	0.414461	0.678537	0.947938	Cadm3
96.732	0.798964	0.340562	2.34602	0.0189752	0.226348	Cadm4
360.663	0.154203	0.191454	0.805435	0.420569	0.853268	Cadps
258.466	0.138014	0.231103	0.597196	0.550377	0.906784	Cadps2
11.9404	-2.02292	2.0022	-1.01035	0.312329	0.77781	Cage1
22.6819	1.03879	0.897544	1.15737	0.247122	0.717189	Cahm
759.238	-0.360434	0.185063	-1.94763	0.0514593	0.37166	Calb1
177.212	-0.198517	0.279586	-0.710041	0.477678	0.878331	Calb2
4.85026	-1.85631	3.41769	-0.543148	0.587028		Calca
5.9255	-5.54589	2.98427	-1.85837	0.0631163	0.410061	Calcb
30.4069	-0.331108	0.775184	-0.427135	0.669281	0.946419	Calcoco1
36.9634	1.44839	0.602898	2.40239	0.0162885	0.209842	Calcrl
95.9815	-0.222246	0.393413	-0.564918	0.572129	0.914729	Cald1
34305.5	-0.0334733	0.0672165	-0.497992	0.61849	0.931427	Calm1
8505.97	0.0939206	0.098774	0.950863	0.341674	0.800367	Calm2
1621.34	0.238396	0.129557	1.84009	0.0657547	0.418383	Calm3
237.993	0.00689079	0.222172	0.0310156	0.975257	0.997774	Caln1
469.702	0.335507	0.183594	1.82744	0.0676332	0.422998	Calr
25.7093	1.57127	1.18052	1.331	0.183189	0.64317	Calu
821.559	-0.476235	0.155893	-3.05487	0.00225156	0.0678355	Caly
122.074	0.225577	0.369265	0.61088	0.541279	0.903152	Camk1
308.532	0.790191	0.208657	3.78703	0.000152461	0.0126389	Camk1d
31.4899	0.731423	0.682904	1.07105	0.284148	0.753179	Camk1g
1792.51	-0.304306	0.201653	-1.50906	0.131284	0.562431	Camk2a
588.325	0.559839	0.176818	3.16619	0.00154452	0.0547616	Camk2b
150.796	-0.283139	0.330795	-0.855936	0.392033	0.834443	Camk2d
201.628	-0.0433069	0.279625	-0.154875	0.87692	0.981051	Camk2g
1901.2	0.750876	0.159353	4.71202	2.45276e-06	0.00054393	Camk2n1
62.1102	-0.0343219	0.468899	-0.0731967	0.94165	0.992686	Camk2n2
332.241	-0.392841	0.214246	-1.83359	0.0667142	0.421049	Camk4
95.7651	0.249111	0.336514	0.740269	0.459137	0.869854	Camkk1
129.451	0.0137646	0.320851	0.0429001	0.965781	0.997497	Camkk2
25.5568	-0.230135	1.11856	-0.205743	0.836992	0.97975	Camkmt
259.585	-0.223384	0.23465	-0.951987	0.341104	0.799865	Camkv
175.906	-0.0416151	0.384085	-0.108349	0.913719	0.987646	Caml
104.665	0.0695046	0.332431	0.20908	0.834386	0.978989	Camsap1
345.529	0.176108	0.243991	0.721779	0.47043	0.874165	Camsap2
16.9781	-0.345384	1.19473	-0.289089	0.772513	0.968808	Camsap3
881.406	0.366776	0.130218	2.81663	0.00485299	0.10672	Camta1
27.5727	-0.334972	0.74419	-0.450116	0.652627	0.942439	Camta2
196.19	0.456981	0.257403	1.77535	0.0758398	0.446552	Cand1
19.553	-0.00205229	1.06691	-0.00192358	0.998465	0.999803	Cant1
741.682	0.617052	0.198276	3.11209	0.00185768	0.0617429	Canx
86.5691	0.898298	0.546429	1.64394	0.100188	0.499767	Cap1
428.461	-0.360247	0.182881	-1.96985	0.0488559	0.362676	Cap2
8.49966	-0.640573	1.9791	-0.323668	0.746189	0.963255	Capn1
14.9097	-0.767444	1.00271	-0.765371	0.44405	0.862627	Capn10
30.9952	0.445741	0.919918	0.484545	0.627999	0.933511	Capn15
58.0688	0.792745	0.471055	1.68291	0.0923916	0.483886	Capn2
10.607	0.981512	1.32971	0.738138	0.46043	0.870474	Capn5
68.0196	0.790801	0.551147	1.43483	0.151336	0.598403	Capn7
269.828	-0.287632	0.208626	-1.3787	0.167988	0.626107	Capns1
385.707	-0.295752	0.20887	-1.41597	0.156785	0.606035	Caprin1
11.8567	1.81999	4.1838	0.435009	0.663556	0.946271	Caprin2
17.5297	0.462926	1.13942	0.406281	0.684536	0.948242	Capsl
24.7587	0.776126	0.690821	1.12348	0.261232	0.731273	Capza1
711.5	0.110358	0.207828	0.531005	0.595416	0.923664	Capza2
388.88	0.144049	0.220148	0.654331	0.512899	0.890863	Capzb
77.1845	-0.498298	0.57022	-0.87387	0.382189	0.829929	Car10
140.167	0.19221	0.338762	0.567391	0.570449	0.913971	Car11
24.7798	-0.246576	0.801771	-0.307539	0.758433	0.964723	Car12
7.35366	-1.99953	2.32323	-0.860668	0.389421	0.833112	Car13
7.65588	0.152567	1.60534	0.0950376	0.924285	0.989403	Car14
5.42418	1.75325	2.6421	0.663584	0.506957		Car15
1191.27	0.0758406	0.121975	0.621771	0.534093	0.899535	Car2
44.1972	-0.0758905	0.713983	-0.106292	0.915351	0.987646	Car4
9.53725	1.64381	1.82421	0.901109	0.36753	0.816789	Car5b
6.96114	-1.58916	2.06814	-0.7684	0.44225	0.862245	Car7
12.6771	1.4767	1.07224	1.3772	0.16845	0.626107	Car8
7.94722	-0.55737	2.00329	-0.278227	0.780838	0.970348	Card6
28.2851	0.233997	0.689712	0.339267	0.734408	0.960893	Carf
35.4796	0.40028	0.741802	0.539605	0.58947	0.921086	Carhsp1
83.4983	-0.879841	0.442531	-1.9882	0.0467895	0.354722	Carkd
42.6952	-0.230374	0.531985	-0.433047	0.664981	0.946271	Carm1
42.1627	-1.23892	0.571202	-2.16898	0.0300843	0.285346	Cars
32.1715	-0.169258	1.03307	-0.16384	0.869857	0.980573	Cars2
26.1747	-4.25546	1.03817	-4.099	4.14931e-05	0.00478125	Cartpt
42.6837	1.48858	0.719214	2.06973	0.0384774	0.321954	Casc3
463.719	-0.375965	0.228432	-1.64585	0.0997944	0.498584	Casc4
232.422	0.355803	0.340371	1.04534	0.295867	0.765956	Casd1
111.065	-0.112565	0.46911	-0.239953	0.810366	0.975637	Cask
60.2766	0.131386	0.565655	0.232272	0.816327	0.976123	Caskin1
9.72375	-2.7357	1.90893	-1.43311	0.151827	0.599293	Caskin2
9.67496	-1.22515	1.44304	-0.849009	0.395876	0.836996	Casp1
6.39841	-0.59206	2.28708	-0.258872	0.795734	0.973406	Casp2
25.9679	-0.905446	1.21601	-0.744602	0.456512	0.868911	Casp3
78.1152	0.917911	0.500444	1.83419	0.0666253	0.421049	Casp8ap2
15.7244	0.771502	3.24747	0.23757	0.812214	0.975637	Casp9
22.6334	0.466126	0.764391	0.609801	0.541994	0.903689	Cast
5.64633	-5.48002	3.25677	-1.68266	0.0924416	0.483886	Casz1
40.5302	0.247231	0.599075	0.412688	0.679835	0.947938	Cat
16.2801	0.114147	1.08569	0.105138	0.916266	0.987732	Cav1
71.7067	-0.101921	0.46841	-0.217589	0.827749	0.977987	Cav2
52.0081	-0.446988	0.518877	-0.861453	0.388989	0.833112	Cbfa2t2
80.1424	0.614248	0.621675	0.988052	0.323127	0.785692	Cbfa2t3
36.5181	0.408945	0.545193	0.750092	0.453199	0.866676	Cbfb
74.0884	-0.0684413	0.422402	-0.162029	0.871283	0.980573	Cbl
49.3602	0.301314	0.538752	0.559283	0.575969	0.916257	Cblb
76.6173	0.668974	0.487094	1.3734	0.169629	0.626822	Cbll1
13.0741	-0.299932	1.98728	-0.150926	0.880034	0.981051	Cbln1
43.7289	0.885611	0.751321	1.17874	0.238502	0.708558	Cbln2
20.9538	-3.61875	1.25626	-2.88056	0.00396966	0.094509	Cbln4
99.5482	-0.777885	0.347038	-2.2415	0.0249937	0.259228	Cbr1
18.4953	0.569562	1.09719	0.519109	0.603685	0.927502	Cbr3
30.0801	-0.197227	0.716032	-0.275444	0.782975	0.97049	Cbr4
10.9179	-0.866513	2.05037	-0.422612	0.672578	0.946557	Cbs
41.2823	-0.617651	0.6424	-0.961475	0.336314	0.795624	Cbwd1
154.435	-0.457556	0.385956	-1.18551	0.235815	0.707584	Cbx1
95.3154	0.232676	0.431749	0.538915	0.589945	0.921361	Cbx3
32.4591	-1.07607	0.836299	-1.2867	0.198199	0.662831	Cbx4
862.37	-0.197963	0.175819	-1.12595	0.260186	0.731273	Cbx5
106.517	0.355577	0.393047	0.904668	0.365641	0.815737	Cbx6
45.1676	0.0956999	0.683217	0.140073	0.888603	0.98279	Cbx7
6.10603	-0.22688	2.05726	-0.110283	0.912185	0.987646	Cbx8
59.2241	-0.026611	0.550674	-0.0483243	0.961458	0.996818	Cby1
14.6237	-0.45687	1.40691	-0.324732	0.745384	0.963255	Cc2d1a
99.0229	-0.288253	0.430093	-0.670211	0.502723	0.88816	Cc2d2a
150.193	-0.0554656	0.345244	-0.160656	0.872364	0.980573	Ccar1
13.395	-0.12968	1.09863	-0.118038	0.906038	0.985994	Ccar2
25.4342	-0.331885	0.903897	-0.367172	0.713491	0.955509	Ccbe1
11.9629	-0.109921	4.1831	-0.0262774	0.979036	0.997942	Ccbl1
4.29315	-5.08294	3.40497	-1.4928	0.135489		Ccbl2
13.0935	-2.16271	1.22158	-1.77041	0.0766589	0.448339	Ccdc101
55.9928	-0.176138	0.709235	-0.248349	0.803864	0.974621	Ccdc106
212.125	-0.153634	0.273717	-0.56129	0.5746	0.916257	Ccdc107
14.0136	-1.27468	1.72683	-0.738161	0.460417	0.870474	Ccdc108
4.929	-3.81417	2.91996	-1.30624	0.191471		Ccdc109b
59.4185	-0.0939919	0.467951	-0.200858	0.840809	0.9804	Ccdc112
17.4169	0.118417	0.918975	0.128857	0.897471	0.983906	Ccdc113
30.9163	-1.84314	1.02367	-1.80053	0.0717777	0.435084	Ccdc115
13.7909	0.846953	0.998848	0.847929	0.396477	0.837418	Ccdc117
48.9588	-1.30349	0.533525	-2.44317	0.0145587	0.195525	Ccdc12
500.963	0.247436	0.260026	0.95158	0.34131	0.800186	Ccdc124
6.21178	2.31531	1.78241	1.29898	0.19395	0.657967	Ccdc125
36.0594	0.396704	0.676043	0.586803	0.557336	0.910377	Ccdc126
286.74	-0.0952798	0.239002	-0.398657	0.690146	0.948542	Ccdc127
5.54683	1.43225	2.5869	0.553655	0.579815	0.916993	Ccdc13
38.2105	-0.484551	0.835807	-0.57974	0.56209	0.911987	Ccdc130
104.165	0.270565	0.419261	0.645339	0.518707	0.893196	Ccdc132
81.9781	0.267589	0.547493	0.488753	0.625016	0.932592	Ccdc136
52.7856	0.216454	0.770429	0.280952	0.778747	0.970348	Ccdc137
9.63875	-0.366149	2.15779	-0.169687	0.865257	0.980573	Ccdc138
6.79833	1.34071	1.89791	0.70641	0.479933	0.879678	Ccdc141
68.7436	1.25906	0.63818	1.97289	0.0485083	0.361787	Ccdc148
48.3356	-0.975482	0.478294	-2.0395	0.0414	0.336702	Ccdc149
20.0984	-2.2325	1.22146	-1.82773	0.0675904	0.422998	Ccdc15
19.9133	0.388791	1.14682	0.339015	0.734598	0.960955	Ccdc153
8.89912	-1.94636	1.41516	-1.37536	0.169018	0.626439	Ccdc157
5.68599	4.66712	2.40811	1.93809	0.0526128	0.375296	Ccdc160
4.88184	-5.26436	3.2491	-1.62025	0.105178		Ccdc162
115.182	0.404681	0.340049	1.19007	0.234021	0.706476	Ccdc167
29.1621	-3.39174	1.36147	-2.49123	0.0127301	0.182539	Ccdc171
40.4475	-0.145231	0.560044	-0.259321	0.795387	0.97337	Ccdc173
105.84	-0.882714	0.386065	-2.28644	0.0222287	0.245117	Ccdc174
50.3028	0.339765	0.487301	0.697238	0.485654	0.881428	Ccdc176
15.7458	-0.571184	0.970229	-0.58871	0.556056	0.910301	Ccdc177
13.3287	-1.50999	1.46728	-1.02911	0.303428	0.772061	Ccdc18
72.2846	-0.399265	0.447638	-0.891936	0.372427	0.82165	Ccdc181
35.85	1.10558	2.00058	0.552629	0.580518	0.917474	Ccdc184
130.499	-0.461569	0.41756	-1.1054	0.268988	0.736573	Ccdc186
15.3666	-0.553844	1.54765	-0.357862	0.720447	0.956491	Ccdc22
78.341	-0.0649499	0.454471	-0.142913	0.886359	0.982264	Ccdc23
197.92	-0.789016	0.280385	-2.81404	0.00489229	0.107379	Ccdc25
69.0979	-0.615647	0.407014	-1.51259	0.130383	0.560597	Ccdc28a
67.6891	1.18734	0.414256	2.8662	0.00415436	0.0971008	Ccdc28b
13.0292	1.52413	1.16588	1.30728	0.191118	0.655044	Ccdc3
21.2943	-0.745948	0.96414	-0.773692	0.439113	0.862245	Ccdc30
124.2	0.751284	0.378042	1.9873	0.0468889	0.354994	Ccdc32
189.805	0.0503609	0.2991	0.168375	0.866289	0.980573	Ccdc34
90.074	0.903497	0.46948	1.92446	0.0542964	0.380108	Ccdc39
117.107	0.0355988	0.404611	0.0879828	0.92989	0.989924	Ccdc43
300.663	-0.555983	0.383857	-1.44841	0.147502	0.593201	Ccdc47
163.541	0.315831	0.252145	1.25258	0.210359	0.677961	Ccdc50
7.39058	-4.41012	2.21568	-1.99042	0.046545	0.354019	Ccdc51
53.0394	0.0210794	0.730994	0.0288366	0.976995	0.997774	Ccdc53
124.516	0.145108	0.310047	0.468021	0.63977	0.937087	Ccdc55
43.5302	-0.595027	0.607139	-0.980051	0.327061	0.789335	Ccdc58
170.984	-0.240273	0.287916	-0.834526	0.403985	0.842778	Ccdc59
104.315	0.246189	0.310354	0.793251	0.427631	0.856378	Ccdc6
21.9902	-0.921232	0.902511	-1.02074	0.307376	0.775286	Ccdc61
9.44406	-0.904595	1.42159	-0.636325	0.524565	0.895547	Ccdc65
43.1718	0.458049	0.802371	0.570869	0.568088	0.912676	Ccdc66
12.6458	-4.20869	1.55808	-2.7012	0.00690907	0.131375	Ccdc71
80.9845	0.392904	0.419571	0.936442	0.349046	0.803895	Ccdc71l
69.2479	0.283216	0.532551	0.531809	0.594858	0.9236	Ccdc74a
8.78634	1.15846	1.47122	0.787414	0.43104	0.857339	Ccdc80
70.3894	0.846851	0.541636	1.56351	0.117934	0.535365	Ccdc82
24.3041	0.656894	1.08255	0.606804	0.543981	0.904479	Ccdc84
124.505	0.865989	0.326851	2.64949	0.00806138	0.144241	Ccdc85a
92.4266	-0.389465	0.344883	-1.12927	0.258786	0.729991	Ccdc85b
9.08907	-0.443395	1.6035	-0.276517	0.782151	0.970362	Ccdc86
5.89834	0.176243	3.15137	0.0559259	0.955401	0.995216	Ccdc87
586.621	0.494683	0.180251	2.74441	0.0060619	0.122761	Ccdc88a
8.16089	-1.14479	1.98095	-0.577898	0.563333	0.911987	Ccdc88b
5.57361	2.13387	2.61902	0.814759	0.41521	0.848761	Ccdc88c
11.2365	1.49822	1.6992	0.881724	0.377926	0.825774	Ccdc9
95.8659	0.272702	0.363646	0.749913	0.453307	0.866676	Ccdc90b
62.4243	-0.947407	0.494666	-1.91525	0.0554611	0.383831	Ccdc91
80.3815	0.127902	0.535702	0.238756	0.811295	0.975637	Ccdc92
28.3228	0.643826	0.816881	0.788152	0.430608	0.857339	Ccdc93
15.5586	1.40662	1.85694	0.757491	0.448756	0.863633	Ccdc94
21.2439	0.564195	0.782287	0.721212	0.470779	0.874165	Ccdc97
1230.98	-0.509576	0.187203	-2.72205	0.00648778	0.127793	Cck
9.29333	-6.19459	2.01034	-3.08136	0.00206056	0.0655908	Cckbr
13.5509	0.0436689	1.5127	0.0288681	0.97697	0.997774	Ccl17
25.4821	-2.0997	0.940939	-2.23149	0.0256485	0.262082	Ccl25
295.035	-0.30399	0.199581	-1.52315	0.127722	0.556424	Ccl27a
12.7246	-0.677702	1.39843	-0.484615	0.62795	0.933511	Ccl6
6.51118	0.653482	3.01409	0.216809	0.828357	0.977987	Ccl9
72.2734	-0.195721	0.644115	-0.30386	0.761235	0.965145	Ccm2
111.22	-0.212751	0.341384	-0.623203	0.533151	0.89883	Ccnc
103.452	0.368397	0.390159	0.944225	0.345055	0.802517	Ccnd1
334.443	0.192156	0.186415	1.0308	0.302637	0.771775	Ccnd2
18.4901	0.467722	0.860813	0.543349	0.58689	0.92096	Ccnd3
104.727	-0.34351	0.458986	-0.74841	0.454213	0.866855	Ccndbp1
22.0147	0.113224	1.15109	0.0983629	0.921644	0.988593	Ccne1
12.6771	1.00838	1.2312	0.819024	0.412773	0.848369	Ccne2
197.914	0.173305	1.01363	0.170974	0.864244	0.980573	Ccng1
70.8563	1.13107	0.525032	2.15429	0.0312174	0.292216	Ccng2
278.189	0.065995	0.293103	0.22516	0.821855	0.976504	Ccnh
400.724	0.0740416	0.217375	0.340616	0.733393	0.960219	Ccni
8.50796	0.798559	1.91549	0.416896	0.676754	0.9475	Ccnj
13.4224	0.576562	1.34441	0.428859	0.668026	0.946419	Ccnjl
19.8907	-2.06664	1.53843	-1.34335	0.17916	0.638162	Ccnk
91.1227	0.0532037	0.432944	0.122888	0.902196	0.985994	Ccnl1
60.2713	-0.14937	0.522799	-0.285711	0.775099	0.969442	Ccnl2
16.5191	-0.16383	1.16297	-0.140873	0.887971	0.98272	Ccnt1
29.4982	-1.98127	0.832792	-2.37907	0.0173565	0.215284	Ccnt2
56.4388	0.395912	0.678978	0.5831	0.559826	0.911104	Ccny
17.6747	-1.04136	1.0403	-1.00102	0.316817	0.779138	Ccnyl1
109.439	-0.0382436	0.576371	-0.0663525	0.947097	0.992937	Ccp110
161.29	-0.345413	0.284482	-1.21418	0.224678	0.695771	Ccpg1
64.2101	-0.761708	0.459522	-1.65761	0.0973962	0.49484	Ccpg1os
4.75715	-5.22763	3.29928	-1.58447	0.113086		Ccr5
85.1837	0.323941	0.389386	0.831928	0.40545	0.843625	Ccrn4l
29.3944	0.753209	0.801388	0.939881	0.347279	0.802665	Ccs
77.0026	0.431341	0.423125	1.01942	0.308006	0.775286	Ccsap
22.3399	1.75377	1.2345	1.42063	0.155424	0.603016	Ccser1
316.414	-0.150916	0.19863	-0.759783	0.447384	0.862903	Ccser2
367.675	-0.0513007	0.185486	-0.276574	0.782107	0.970362	Cct2
206.152	0.199465	0.330593	0.603354	0.546273	0.905979	Cct3
258.192	-0.204924	0.272119	-0.753069	0.451409	0.865781	Cct4
426.291	-0.484477	0.229354	-2.11235	0.034656	0.306714	Cct5
556.355	0.0543669	0.205746	0.264243	0.791593	0.972651	Cct6a
565.007	-0.321278	0.185521	-1.73177	0.0833154	0.465588	Cct7
391.403	0.0790548	0.185903	0.425248	0.670656	0.946419	Cct8
85.1613	-0.910513	0.610976	-1.49026	0.136156	0.570437	Ccz1
14.2389	1.31156	2.00822	0.653096	0.513694	0.890896	Cd14
13.5541	-2.17297	1.40658	-1.54486	0.12238	0.544261	Cd151
89.8933	-0.460497	0.414955	-1.10975	0.267105	0.7358	Cd164
10.5248	1.62974	2.20288	0.739822	0.459408	0.869854	Cd164l2
198.231	0.15431	0.277959	0.555153	0.57879	0.916421	Cd200
18.2362	0.039113	1.01894	0.0383858	0.96938	0.997667	Cd24a
57.9608	-1.01401	0.642562	-1.57807	0.11455	0.528188	Cd2ap
31.1925	-0.171598	0.712127	-0.240965	0.809582	0.975636	Cd2bp2
69.7018	0.384994	0.586575	0.656342	0.511604	0.89065	Cd302
42.1071	-0.371639	0.642419	-0.578499	0.562927	0.911987	Cd320
16.5096	-0.25141	1.25714	-0.199985	0.841492	0.9804	Cd34
10.5996	-0.0730319	1.28244	-0.0569477	0.954587	0.995088	Cd36
52.3076	0.236697	0.445189	0.531677	0.59495	0.9236	Cd3eap
10.0883	1.69934	1.58881	1.06957	0.284814	0.754116	Cd44
304.302	0.320231	0.217649	1.47131	0.141206	0.5807	Cd47
14.4301	-1.60828	1.02487	-1.56926	0.116587	0.532258	Cd52
18.9917	1.49935	0.994079	1.50828	0.131483	0.562431	Cd53
14.6458	0.395337	1.66766	0.237061	0.812609	0.97569	Cd55
34.8499	1.02366	0.76387	1.34009	0.180216	0.640341	Cd59a
209.29	-0.332664	0.330844	-1.0055	0.314655	0.778921	Cd63
39.0489	-0.394485	0.611385	-0.645232	0.518777	0.893196	Cd68
1271.1	0.0154799	0.149697	0.103409	0.917639	0.987857	Cd81
9.80146	2.15434	2.26944	0.949281	0.342478	0.800969	Cd82
30.138	-0.257426	0.734981	-0.350248	0.726152	0.958392	Cd83
7.05172	1.63104	2.03933	0.799789	0.423833	0.854614	Cd84
156.918	-0.822154	0.309868	-2.65324	0.00797223	0.142958	Cd9
85.0093	-0.757908	1.4663	-0.516884	0.605237	0.927715	Cd99l2
152.605	-0.112358	0.3737	-0.300664	0.763671	0.965841	Cdadc1
11.2526	1.31459	1.23226	1.06681	0.286056	0.755669	Cdan1
243.426	0.225445	0.238751	0.944268	0.345032	0.802517	Cdc123
16.0531	-1.24614	1.58133	-0.788031	0.430679	0.857339	Cdc14a
5.80961	-1.58937	2.16672	-0.73354	0.463229	0.872302	Cdc14b
144.462	0.129415	0.284037	0.455627	0.648658	0.941609	Cdc16
56.9951	-0.994256	0.555204	-1.79079	0.0733265	0.43944	Cdc23
8.1319	0.21002	2.25325	0.0932072	0.925739	0.989403	Cdc25a
16.0323	-2.85227	1.10312	-2.58564	0.00971975	0.158663	Cdc25b
52.9214	0.20658	0.618383	0.334064	0.738331	0.962855	Cdc26
132.604	0.125119	0.313148	0.399554	0.689485	0.948542	Cdc27
101.288	0.255293	0.391656	0.651828	0.514512	0.890896	Cdc34
207.191	0.198823	0.271416	0.732541	0.463839	0.872623	Cdc37
281.546	-0.0781185	0.2606	-0.299764	0.764357	0.966165	Cdc37l1
235.461	-0.860048	0.230555	-3.73034	0.000191221	0.0141246	Cdc40
1132.44	-0.0852958	0.19622	-0.434695	0.663784	0.946271	Cdc42
472.033	0.103475	0.219418	0.47159	0.637219	0.935951	Cdc42bpa
83.1089	-0.665855	0.488281	-1.36367	0.172671	0.62937	Cdc42bpb
11.0877	-2.36564	1.72798	-1.36902	0.170992	0.627703	Cdc42ep1
4.77861	-1.40562	1.98438	-0.708346	0.47873		Cdc42ep2
28.4778	-1.31322	0.678405	-1.93574	0.0528997	0.375347	Cdc42ep3
21.027	0.362473	1.25426	0.288994	0.772586	0.968808	Cdc42ep4
91.534	0.492905	0.344817	1.42947	0.152869	0.60038	Cdc42se1
183.106	-0.427858	0.301388	-1.41962	0.155717	0.603619	Cdc42se2
163.895	0.322493	0.291914	1.10475	0.269266	0.736573	Cdc5l
7.70116	-0.641613	1.79204	-0.358035	0.720317	0.956481	Cdc7
46.5112	0.931069	0.646011	1.44126	0.149512	0.596496	Cdc73
15.8778	2.03925	1.83324	1.11237	0.265978	0.7358	Cdca4
8.69478	-6.09943	2.18336	-2.7936	0.00521252	0.111024	Cdca8
57.3289	1.10371	0.566413	1.9486	0.0513436	0.37136	Cdh10
163.727	-0.0676419	0.262534	-0.25765	0.796677	0.973406	Cdh11
33.923	-0.101434	0.680973	-0.148954	0.88159	0.981051	Cdh12
80.4408	-0.696522	0.498825	-1.39633	0.162617	0.61859	Cdh13
7.52394	-0.597492	2.55082	-0.234236	0.814802	0.976113	Cdh15
10.2829	-4.88979	1.86091	-2.62764	0.00859795	0.14876	Cdh18
8.40435	0.688827	1.7395	0.395991	0.692112	0.949131	Cdh19
169.921	-0.362682	0.27315	-1.32777	0.184253	0.645726	Cdh2
13.9742	-3.19325	1.48441	-2.15119	0.0314611	0.293687	Cdh4
18.4436	-0.15324	0.852947	-0.179659	0.85742	0.980573	Cdh7
143.679	0.382269	0.398968	0.958145	0.33799	0.796321	Cdh8
75.6854	-0.220161	0.427245	-0.515304	0.606341	0.927871	Cdh9
9.78307	0.337552	1.84999	0.182462	0.85522	0.980573	Cdhr3
214.854	-0.131177	0.328939	-0.398788	0.69005	0.948542	Cdip1
110.685	-0.417051	0.333631	-1.25004	0.211286	0.678703	Cdipt
19.6165	-0.146274	1.1431	-0.127963	0.898178	0.983906	Cdk10
107.827	0.185874	0.311397	0.596905	0.550571	0.906956	Cdk11b
68.4043	0.200965	0.522944	0.384296	0.700759	0.953234	Cdk12
152.399	0.167695	0.292828	0.572676	0.566864	0.912676	Cdk13
712.253	0.377233	0.1687	2.23612	0.025344	0.260517	Cdk14
43.9512	0.492596	0.510132	0.965625	0.334232	0.794128	Cdk16
231.1	0.0857297	0.211929	0.404521	0.68583	0.948453	Cdk17
12.2608	-1.77166	1.51775	-1.1673	0.243091	0.714393	Cdk18
55.3775	-0.0429004	0.589806	-0.0727364	0.942016	0.992852	Cdk19
33.9117	-0.17728	0.654456	-0.270882	0.786482	0.971447	Cdk2ap1
92.9937	-1.02638	0.524832	-1.95563	0.0505087	0.369062	Cdk2ap2
136.913	-1.04177	0.378657	-2.75123	0.00593712	0.121516	Cdk4
144.698	-0.0656184	0.400936	-0.163663	0.869996	0.980573	Cdk5
283.362	0.0233028	0.205932	0.113158	0.909905	0.986716	Cdk5r1
24.3068	-1.01047	0.969665	-1.04208	0.297376	0.767449	Cdk5r2
8.70915	-4.64393	2.00865	-2.31197	0.0207795	0.236837	Cdk5rap1
37.5467	0.696554	0.743417	0.936963	0.348778	0.803895	Cdk5rap2
50.4321	0.842041	0.852708	0.98749	0.323402	0.786005	Cdk5rap3
139.616	0.282722	0.355292	0.795745	0.42618	0.855617	Cdk7
27.2162	-1.57716	0.994088	-1.58654	0.112616	0.524103	Cdk8
26.2629	0.640778	0.839032	0.763712	0.445039	0.862627	Cdk9
40.9795	-0.481885	0.560752	-0.859356	0.390144	0.833112	Cdkal1
35.163	-0.208619	0.649322	-0.321287	0.747993	0.963255	Cdkl1
188.863	0.121157	0.318634	0.38024	0.703768	0.953861	Cdkl2
15.5127	-0.253823	1.1769	-0.215671	0.829244	0.978133	Cdkl3
33.3728	0.511878	0.667147	0.767264	0.442924	0.862245	Cdkl4
178.316	-0.601108	0.318583	-1.88682	0.0591851	0.395815	Cdkl5
25.1776	-2.77906	1.13706	-2.44408	0.0145221	0.195489	Cdkn1a
173.192	1.57464	0.279395	5.63588	1.74162e-08	9.54089e-06	Cdkn1b
38.0481	-0.96929	0.81489	-1.18947	0.234253	0.706623	Cdkn1c
50.902	1.88692	0.700272	2.69455	0.00704841	0.133345	Cdkn2aip
132.557	0.5579	0.322655	1.72909	0.0837926	0.466671	Cdkn2aipnl
142.574	-0.581237	0.264164	-2.20029	0.0277864	0.274241	Cdkn2d
15.2509	-0.582042	0.937281	-0.62099	0.534606	0.899571	Cdo1
68.1161	0.0668127	0.409706	0.163075	0.87046	0.980573	Cdpf1
37.6895	0.286149	0.607507	0.471021	0.637626	0.936179	Cdr1
21.2613	-2.75018	1.19653	-2.29846	0.0215354	0.24057	Cdr2l
115.449	-0.710013	0.330947	-2.1454	0.0319212	0.293797	Cds1
164.987	-0.818053	0.310392	-2.63555	0.00840014	0.146659	Cds2
103.191	-0.300596	0.319791	-0.939977	0.34723	0.802665	Cdv3
89.6505	0.10833	0.627035	0.172766	0.862836	0.980573	Cdyl
36.1056	1.09995	0.688596	1.59738	0.110181	0.52041	Cdyl2
9.45162	-0.0833193	1.70308	-0.0489226	0.960981	0.996818	Cebpa
161.85	0.079899	0.428817	0.186324	0.85219	0.980573	Cebpb
87.4705	-0.109072	0.335002	-0.325586	0.744738	0.963255	Cebpd
101.269	-0.0398336	0.337776	-0.117929	0.906124	0.985994	Cebpg
180.761	0.0468604	0.314062	0.149208	0.88139	0.981051	Cebpz
389.279	0.423425	0.198155	2.13683	0.0326118	0.29777	Cebpzos
10.7497	0.475055	1.44464	0.32884	0.742277	0.963255	Cecr2
31.6351	-0.718639	0.676776	-1.06186	0.288301	0.757989	Cecr6
296.777	-0.187164	0.216333	-0.865169	0.386946	0.832462	Celf1
1109.04	0.197546	0.111775	1.76735	0.0771699	0.448732	Celf2
5.87413	-4.07196	2.35994	-1.72545	0.0844456	0.468531	Celf3
1304.79	0.132646	0.157269	0.843432	0.398987	0.839441	Celf4
164.254	-0.798337	0.407499	-1.95911	0.0500995	0.36746	Celf5
33.1631	-0.69244	0.827296	-0.836992	0.402597	0.841641	Celf6
12.1912	-1.54605	2.03508	-0.759696	0.447436	0.862903	Celsr1
185.045	-0.524063	0.345855	-1.51526	0.129705	0.558936	Celsr2
13.3812	0.493193	1.51769	0.324963	0.745209	0.963255	Celsr3
9.63765	-1.85813	1.61259	-1.15226	0.249214	0.720786	Cemip
199.857	-0.896587	0.268272	-3.34208	0.00083154	0.0375758	Cend1
17.967	0.722469	1.39002	0.519755	0.603234	0.927502	Cenpa
36.8978	-0.0151605	0.829537	-0.0182758	0.985419	0.997964	Cenpb
77.0114	-0.0644503	0.415415	-0.155147	0.876706	0.981051	Cenpc1
8.88187	-2.52361	2.45682	-1.02719	0.304333	0.772274	Cenpe
16.6541	1.5815	0.897649	1.76183	0.0780986	0.45019	Cenpf
10.7163	-0.42891	2.15415	-0.199108	0.842178	0.9804	Cenpj
9.46213	-6.21782	2.15308	-2.88787	0.00387861	0.0933334	Cenpk
21.8023	-0.340246	1.07119	-0.317633	0.750764	0.963255	Cenpm
27.9634	0.508057	0.822221	0.617908	0.536636	0.900767	Cenpp
19.6153	1.69927	0.98956	1.7172	0.0859427	0.470775	Cenpq
6.74598	1.4923	1.94979	0.765366	0.444054	0.862627	Cenpt
228.061	0.122858	0.251745	0.488024	0.625532	0.932592	Cenpv
35.6131	0.363186	0.695181	0.522433	0.601369	0.926866	Cenpw
12.6211	2.21451	1.49027	1.48598	0.137283	0.572908	Cep104
29.3237	0.520689	0.684278	0.760931	0.446698	0.862903	Cep112
40.6477	-0.881238	0.637058	-1.38329	0.166575	0.624005	Cep120
50.3075	1.32342	0.47518	2.7851	0.00535119	0.113349	Cep126
4.74923	-3.63534	2.93996	-1.23653	0.216262		Cep128
[truncated: 9,752 more rows]

## Sheet: PML KO vs WT_males
baseMean	log2FoldChange	lfcSE	stat	pvalue	padj	GENE
233.605	-0.0847583	0.380266	-0.222892	0.82362	0.990038	0610007P14Rik
287.996	0.320456	0.281911	1.13673	0.255653	0.819946	0610009B22Rik
8.37087	-4.84963	2.42318	-2.00135	0.0453547		0610009L18Rik
30.7612	0.555622	0.870684	0.638144	0.52338	0.947696	0610009O20Rik
160.621	-0.15924	0.323518	-0.492214	0.622568	0.965238	0610010F05Rik
127.025	1.04732	0.37096	2.82326	0.00475377	0.150583	0610010K14Rik
183.894	-0.00577174	0.31535	-0.0183027	0.985397	0.998948	0610011F06Rik
395.659	0.141855	0.252119	0.56265	0.573674	0.956456	0610012G03Rik
14.9727	0.0441341	1.35526	0.0325651	0.974021	0.998948	0610030E20Rik
183.338	0.373995	0.30085	1.24313	0.213821	0.779571	0610037L13Rik
7.75701	-1.81502	2.53479	-0.716042	0.473965		0610040B10Rik
4.771	-5.56155	4.14217	-1.34267	0.17938		0610040J01Rik
12.604	0.955922	1.52936	0.625046	0.531941	0.948218	0610043K17Rik
168.754	0.125902	0.380031	0.331294	0.740423	0.982722	1110001J03Rik
14.0802	-1.59424	1.70642	-0.934265	0.350167	0.881146	1110002L01Rik
206.951	0.0961397	0.35613	0.269957	0.787193	0.986864	1110004E09Rik
841.677	-0.0093257	0.179812	-0.0518636	0.958637	0.998948	1110004F10Rik
26.1525	1.6274	1.0297	1.58046	0.114002	0.647211	1110007C09Rik
305.792	0.589919	0.300509	1.96306	0.0496388	0.485573	1110008F13Rik
12.5651	-1.72554	1.80701	-0.954914	0.339621	0.875931	1110008L16Rik
554.771	0.215179	0.204582	1.0518	0.292893	0.851172	1110008P14Rik
64.1058	-0.237016	0.54996	-0.430969	0.666491	0.973984	1110012L19Rik
31.9858	1.13499	0.909928	1.24734	0.212273	0.777611	1110017D15Rik
6.15485	1.00733	3.17758	0.317011	0.751235		1110019D14Rik
192.428	0.130899	0.32807	0.398998	0.689895	0.978472	1110032A03Rik
41.5995	0.980263	0.778376	1.25937	0.207897	0.771959	1110034G24Rik
81.835	0.213199	0.489688	0.435377	0.663289	0.973984	1110037F02Rik
36.1683	-0.956436	0.75035	-1.27465	0.202432	0.765049	1110038B12Rik
46.2201	0.00775006	0.623347	0.012433	0.99008	0.999664	1110038F14Rik
11.3089	0.447595	2.05849	0.217438	0.827867	0.990038	1110046J04Rik
85.1355	0.15222	0.474937	0.320506	0.748585	0.982938	1110051M20Rik
88.7142	-0.533919	0.468115	-1.14057	0.254048	0.81865	1110059E24Rik
113.546	0.261799	0.449948	0.581843	0.560672	0.95388	1110059G10Rik
488.638	0.561447	0.223117	2.51638	0.0118566	0.253932	1110065P20Rik
75.8082	0.314316	0.70328	0.446928	0.654927	0.973984	1190002N15Rik
26.367	-0.242465	0.879865	-0.275571	0.782877	0.986311	1190007I07Rik
35.44	1.24918	0.718328	1.73902	0.0820321	0.588338	1200014J11Rik
46.3435	0.506983	0.968841	0.523288	0.600774	0.962925	1300002E11Rik
34.6016	1.05918	0.754667	1.4035	0.160467	0.721299	1500004A13Rik
55.3309	-0.773902	0.607363	-1.2742	0.202593	0.765049	1500009C09Rik
59.9383	-0.356253	0.599002	-0.594744	0.552015	0.953638	1500009L16Rik
260.126	-0.169153	0.296044	-0.571379	0.567743	0.954598	1500011B03Rik
405.064	0.314473	0.221941	1.41692	0.156506	0.713169	1500011K16Rik
47.1446	-0.44951	0.631725	-0.711559	0.476738	0.937406	1500012F01Rik
66.2349	1.51215	1.63513	0.924787	0.355077	0.881925	1500015O10Rik
70.5293	0.585066	0.536427	1.09067	0.275417	0.839495	1500026H17Rik
8.71723	-4.96374	2.39559	-2.07203	0.0382623		1600002K03Rik
29.3892	-0.733328	2.68012	-0.273618	0.784378	0.986311	1600012H06Rik
38.2427	0.891871	0.690111	1.29236	0.196233	0.759988	1600014C10Rik
22.8923	-0.913266	1.04236	-0.876151	0.380948	0.896481	1600020E01Rik
13.8935	1.21498	1.63212	0.744418	0.456624	0.929823	1700001C02Rik
7.85449	0.129173	2.83504	0.0455629	0.963659		1700001G17Rik
5.9128	-0.380523	2.84089	-0.133945	0.893446		1700001L05Rik
59.3349	-0.0422895	0.568872	-0.0743392	0.940741	0.997093	1700001L19Rik
9.12012	-3.96495	1.98834	-1.9941	0.0461411	0.470661	1700001O22Rik
17.6563	0.353754	1.1429	0.309522	0.756924	0.984256	1700007K13Rik
5.70914	4.67549	2.85715	1.63642	0.101752		1700008J07Rik
5.48455	-0.222352	2.87343	-0.0773819	0.93832		1700010K23Rik
14.5192	1.0319	4.57889	0.225359	0.8217	0.990038	1700012B09Rik
12.1642	4.153	1.76857	2.34823	0.0188631	0.325624	1700012D01Rik
23.6621	-1.07705	1.41429	-0.761548	0.44633	0.926485	1700016K19Rik
17.1485	-0.553783	1.43046	-0.387137	0.698655	0.97891	1700017B05Rik
43.9222	-0.0101385	0.639132	-0.0158629	0.987344	0.998948	1700019D03Rik
7.5291	0.82216	2.39818	0.342827	0.731729		1700019G17Rik
926.793	0.198648	0.174801	1.13643	0.255778	0.820103	1700020I14Rik
168.849	0.122399	0.364596	0.335711	0.737088	0.982339	1700021F05Rik
21.1319	0.872941	1.04156	0.838106	0.401971	0.908112	1700021K19Rik
7.92708	2.9938	2.11749	1.41384	0.157408		1700024P16Rik
247.358	-0.0932255	0.382859	-0.243499	0.807619	0.987174	1700025G04Rik
6.54284	0.484463	3.08967	0.156801	0.875402		1700026D08Rik
11.5558	-1.05002	1.6796	-0.625163	0.531864	0.948218	1700028P14Rik
11.3691	0.114879	1.95099	0.0588824	0.953046	0.998473	1700029J07Rik
5.66059	-5.80801	3.33478	-1.74165	0.08157		1700030J22Rik
22.4135	2.86417	1.37456	2.0837	0.0371871	0.433137	1700030K09Rik
82.7734	-0.763425	0.665594	-1.14698	0.251389	0.815092	1700037H04Rik
15.3421	1.13989	1.73307	0.657727	0.510713	0.945382	1700047M11Rik
20.3429	-0.0695515	1.61527	-0.0430587	0.965655	0.998948	1700048O20Rik
14.3523	-0.133485	1.38875	-0.0961185	0.923426	0.995886	1700049G17Rik
35.4233	-0.420999	0.778617	-0.5407	0.588714	0.959947	1700066M21Rik
22.1126	0.143943	1.25945	0.11429	0.909008	0.994243	1700084C01Rik
181.806	-0.0775917	0.35081	-0.221179	0.824953	0.990038	1700086L19Rik
13.7251	-1.05872	1.45387	-0.728208	0.466486	0.932453	1700086O06Rik
23.5243	2.81131	1.3148	2.1382	0.0325004	0.407914	1700088E04Rik
22.2827	-0.305847	1.4916	-0.205047	0.837535	0.990873	1700094D03Rik
18.6222	0.335511	1.30049	0.257989	0.796416	0.987174	1700096K18Rik
10.1466	-0.627802	1.72823	-0.363264	0.716408	0.980448	1700101I11Rik
9.82113	0.917376	2.56733	0.357327	0.720847	0.980448	1700102H20Rik
14.2906	-0.583551	1.29437	-0.450836	0.652108	0.973963	1700113A16Rik
18.8586	-0.668757	1.12609	-0.593875	0.552596	0.953638	1700123M08Rik
88.0088	1.17081	0.549362	2.13121	0.0330719	0.409407	1700123O20Rik
4.65948	-1.01561	3.65109	-0.278168	0.780884		1700124L16Rik
7.9679	0.468931	2.38518	0.196602	0.844139		1810010H24Rik
102.6	-0.238452	0.453421	-0.525895	0.598961	0.962925	1810013L24Rik
304.509	0.510404	0.250052	2.04119	0.0412321	0.452928	1810022K09Rik
93.003	0.411184	0.50165	0.819664	0.412408	0.914859	1810026B05Rik
33.1297	-0.0274772	0.859255	-0.0319779	0.97449	0.998948	1810026J23Rik
40.1165	1.82593	0.950715	1.92058	0.0547842	0.507767	1810030O07Rik
6.67866	-6.04793	2.84399	-2.12657	0.0334561		1810032O08Rik
750	0.546311	0.177738	3.07369	0.00211427	0.0988932	1810037I17Rik
7.84113	5.14667	2.9889	1.72193	0.0850821		1810041H14Rik
44.7113	0.152914	0.75151	0.203476	0.838763	0.990882	1810041L15Rik
43.5871	0.581767	0.723511	0.804089	0.421346	0.919006	1810043G02Rik
354.85	0.349033	0.276912	1.26045	0.207507	0.771959	1810043H04Rik
8.87422	3.64132	1.95855	1.85919	0.0629996		1810055G02Rik
98.8432	-0.528314	0.536527	-0.984692	0.324775	0.868381	1810058I24Rik
8.30625	0.409062	1.95651	0.209077	0.834388		2010001A14Rik
168.992	0.366247	0.332027	1.10306	0.269999	0.833103	2010012O05Rik
1852.13	0.375273	0.142657	2.63059	0.0085236	0.213677	2010107E04Rik
17.3162	1.34288	1.25556	1.06955	0.284824	0.848193	2010107G23Rik
30.4473	0.744104	0.827257	0.899484	0.368395	0.889002	2010111I01Rik
122.718	0.401242	0.510411	0.786115	0.4318	0.923449	2010204K13Rik
284.618	0.0142075	0.281077	0.0505468	0.959687	0.998948	2010300C02Rik
44.879	0.395282	0.728063	0.542923	0.587183	0.95962	2010315B03Rik
35.0814	0.288642	0.804313	0.358868	0.719694	0.980448	2010320M18Rik
171.809	-0.245438	0.337609	-0.726988	0.467233	0.933078	2210013O21Rik
59.7581	0.352268	0.555707	0.63391	0.52614	0.947738	2210015D19Rik
54.6623	2.15987	0.702122	3.0762	0.00209656	0.0986025	2210016F16Rik
618.495	-0.0503871	0.220643	-0.228365	0.819363	0.990038	2210016L21Rik
74.8757	-0.648213	0.771845	-0.839823	0.401007	0.907161	2210018M11Rik
14.9043	1.51115	1.51105	1.00006	0.317279	0.864764	2210404O09Rik
18.0767	0.283555	1.19358	0.237567	0.812217	0.98776	2210406O10Rik
53.7559	0.678473	0.665061	1.02017	0.30765	0.860437	2210408F21Rik
49.223	0.795729	0.59874	1.32901	0.183846	0.752969	2210408I21Rik
7.22441	0.16199	2.95193	0.0548761	0.956237		2210416O15Rik
43.9712	-0.292454	0.882205	-0.331504	0.740264	0.982722	2300009A05Rik
160.69	0.2973	0.381312	0.779675	0.435582	0.924119	2310009A05Rik
94.3367	0.839798	0.572404	1.46714	0.142337	0.693025	2310009B15Rik
26.5772	1.24078	0.87035	1.42561	0.153981	0.711163	2310010J17Rik
42.6464	0.525797	0.747564	0.703347	0.48184	0.937978	2310011J03Rik
4.84978	-0.356336	2.7013	-0.131913	0.895053		2310015A10Rik
7.17141	5.01799	2.78095	1.80441	0.0711664		2310022A10Rik
87.4705	1.30075	0.451446	2.88128	0.00396057	0.139362	2310022B05Rik
5.36851	-0.0469855	3.40795	-0.013787	0.989		2310030G06Rik
81.0064	-0.379635	0.504202	-0.752943	0.451484	0.927955	2310033P09Rik
155.459	0.131367	0.380656	0.345106	0.730014	0.981346	2310035C23Rik
104.466	-0.446992	0.517949	-0.863003	0.388136	0.899355	2310036O22Rik
77.4933	0.849506	0.636849	1.33392	0.18223	0.750669	2310039H08Rik
9.33137	-1.09545	2.232	-0.490791	0.623574	0.965238	2310040G24Rik
74.1049	0.81393	0.546353	1.48975	0.13629	0.687506	2310045N01Rik
9.49354	4.3805	1.94076	2.25711	0.024001	0.364573	2310047M10Rik
74.0033	-0.295075	0.491719	-0.600089	0.548447	0.953149	2310057M21Rik
40.5913	1.21269	0.909338	1.3336	0.182335	0.750669	2310061I04Rik
29.9782	-1.25226	0.933776	-1.34107	0.179898	0.748939	2310067B10Rik
62.7899	0.677136	0.613953	1.10291	0.270065	0.833103	2410002F23Rik
97.5935	-0.24187	0.466304	-0.518696	0.603972	0.962925	2410004B18Rik
9.70596	-6.58726	2.36419	-2.78627	0.00533186	0.159134	2410004I01Rik
185.296	0.631941	0.300632	2.10204	0.0355497	0.421664	2410006H16Rik
540.92	0.420236	0.204386	2.05609	0.0397734	0.446208	2410015M20Rik
180.414	-1.01954	0.457246	-2.22974	0.0257647	0.37097	2410089E03Rik
9.09506	-0.490118	1.74535	-0.280814	0.778853	0.986234	2410127L17Rik
12.2271	-0.413724	1.40671	-0.294106	0.768677	0.985692	2410131K14Rik
10.5655	1.69724	1.97983	0.857267	0.391297	0.901554	2500002B13Rik
30.1821	-0.761899	0.835358	-0.912063	0.361735	0.886956	2500004C02Rik
53.6664	-0.475512	0.56807	-0.837067	0.402555	0.908342	2510002D24Rik
6.16521	6.26672	3.60858	1.73662	0.0824551		2510003B16Rik
52.611	-0.682739	0.656224	-1.04041	0.298152	0.854226	2510009E07Rik
30.7965	-0.482241	0.851815	-0.566133	0.571303	0.955573	2510039O18Rik
31.2421	-0.134179	0.819682	-0.163696	0.86997	0.992252	2610001J05Rik
66.5145	-0.494729	0.507979	-0.973917	0.330098	0.871006	2610002M06Rik
43.9798	1.2233	0.795835	1.53713	0.124262	0.669799	2610008E11Rik
34.3223	0.794288	0.933448	0.850918	0.394815	0.902619	2610015P09Rik
33.216	-0.149885	0.745025	-0.201181	0.840557	0.990882	2610035D17Rik
23.0741	-0.922839	1.11971	-0.824178	0.409839	0.914242	2610044O15Rik8
37.0744	-0.237182	0.68704	-0.345223	0.729927	0.981346	2610100L16Rik
132.281	0.113775	0.355324	0.320201	0.748816	0.982938	2610301B20Rik
14.5252	0.115391	1.62423	0.0710436	0.943363	0.997093	2610306M01Rik
15.622	0.468995	1.7172	0.273116	0.784764	0.986451	2610316D01Rik
241.231	0.205346	0.305305	0.672591	0.501207	0.941676	2610507B11Rik
86.1634	-0.456361	0.499157	-0.914265	0.360578	0.886	2610507I01Rik
95.0838	-0.101118	0.499716	-0.20235	0.839643	0.990882	2610524H06Rik
265.753	0.0877764	0.334584	0.262345	0.793056	0.987174	2700029M09Rik
17.5174	2.44569	1.51218	1.61732	0.105809	0.634932	2700046G09Rik
27.7085	-0.473051	0.841134	-0.562396	0.573846	0.956456	2700049A03Rik
268.181	0.437175	0.336068	1.30085	0.193309	0.758595	2700060E02Rik
42.9301	1.67545	0.911471	1.83818	0.0660355	0.540667	2700062C07Rik
20.1947	-0.311003	1.38346	-0.224801	0.822134	0.990038	2700081O15Rik
135.23	-0.107971	0.408822	-0.264104	0.7917	0.987174	2700094K13Rik
14.6492	1.19624	1.59158	0.751609	0.452286	0.928071	2700097O09Rik
47.7599	0.00583293	0.706761	0.00825305	0.993415	0.999692	2810001G20Rik
9.62011	3.30214	1.83661	1.79795	0.0721846	0.560107	2810002D19Rik
171.394	-0.18296	0.408771	-0.447586	0.654452	0.973984	2810004N23Rik
99.8034	-0.216119	0.443994	-0.48676	0.626428	0.966182	2810006K23Rik
96.8909	0.742938	0.430918	1.72408	0.0846928	0.595219	2810013P06Rik
16.9119	-3.5742	1.46392	-2.44153	0.0146253	0.286911	2810021J22Rik
30.0808	0.247593	0.870181	0.284531	0.776004	0.986234	2810025M15Rik
8.03876	0.275541	2.81348	0.0979362	0.921983		2810029C07Rik
60.7191	-0.184417	0.52523	-0.351116	0.725501	0.980448	2810403A07Rik
17.4187	1.2719	1.74276	0.729816	0.465503	0.932306	2810403D21Rik
414.062	0.519958	0.24418	2.1294	0.0332211	0.409867	2810428I15Rik
5.48956	0.195184	2.85604	0.068341	0.945514		2810454H06Rik
27.8534	0.441186	1.13443	0.388907	0.697345	0.97891	2810459M11Rik
44.7448	-0.221879	0.829933	-0.267346	0.789203	0.987174	2810468N07Rik
115.301	-0.519392	0.401087	-1.29496	0.195334	0.759897	2810474O19Rik
12.9034	-0.22703	1.36211	-0.166676	0.867625	0.992252	2900009J06Rik
568.677	0.430219	0.222938	1.92977	0.0536356	0.502174	2900011O08Rik
59.3592	-1.24056	0.55574	-2.23226	0.0255976	0.370394	2900026A02Rik
117.607	0.127201	0.471591	0.269728	0.78737	0.986864	2900052N01Rik
175.692	-0.126662	0.310226	-0.408289	0.683062	0.976839	2900055J20Rik
18.8144	0.714624	1.08381	0.659363	0.509663	0.944867	2900060B14Rik
49.1669	0.511874	0.77642	0.659275	0.509719	0.944867	2900076A07Rik
14.0505	-2.148	1.6526	-1.29977	0.193679	0.758595	2900079G21Rik
147.64	-2.25496	0.362142	-6.22672	4.76311e-10	2.05195e-07	2900092D14Rik
221.157	0.243748	0.293501	0.830486	0.406264	0.912316	2900097C17Rik
26.2367	0.473025	0.938854	0.503832	0.614379	0.96498	3010026O09Rik
42.5242	-0.835427	0.6602	-1.26541	0.205723	0.769051	3110002H16Rik
14.7631	-0.617126	1.25365	-0.492265	0.622532	0.965238	3110009E18Rik
4.36842	-5.43594	4.34304	-1.25164	0.2107		3110009F21Rik
12.6947	2.03512	1.78568	1.13969	0.254416	0.818659	3110021N24Rik
319.397	0.0744205	0.259068	0.287262	0.773911	0.986234	3110035E14Rik
33.0393	-0.235472	0.938471	-0.25091	0.801884	0.987174	3110039I08Rik
38.4219	1.96256	0.915323	2.14412	0.0320233	0.406144	3110039M20Rik
58.4543	0.187326	0.682919	0.274302	0.783852	0.986311	3110040N11Rik
43.932	-1.29573	0.919512	-1.40915	0.15879	0.716451	3110043O21Rik
13.339	0.746429	1.34264	0.555942	0.578251	0.957146	3110045C21Rik
17.4046	-0.737237	1.16971	-0.630274	0.528516	0.94819	3110052M02Rik
16.7222	-1.25583	1.47053	-0.853999	0.393105	0.901554	3110056K07Rik
12.8151	0.727227	1.58135	0.459878	0.645604	0.973963	3110057O12Rik
8.53445	0.242325	2.2373	0.108311	0.913749		3110062M04Rik
16.5368	1.70133	1.33313	1.2762	0.201886	0.765049	3110070M22Rik
38.7588	-0.137355	0.919319	-0.14941	0.88123	0.992775	3110082I17Rik
9.21049	3.69482	1.94213	1.90246	0.0571107	0.518619	3300002I08Rik
44.6094	0.81462	0.727824	1.11925	0.263031	0.828802	3632451O06Rik
9.73401	-5.07919	2.25083	-2.25658	0.0240341	0.364573	3632454L22Rik
66.343	0.333399	0.576565	0.57825	0.563095	0.953993	3830406C13Rik
10.9934	-0.957801	1.93111	-0.495985	0.619905	0.965055	4430402I18Rik
17.4082	1.96044	1.86658	1.05028	0.293587	0.851172	4632404H12Rik
137.55	0.881246	0.414889	2.12405	0.0336656	0.411554	4632415L05Rik
8.25451	6.68784	2.60646	2.56587	0.0102916		4632427E13Rik
21.1953	0.113952	1.12537	0.101258	0.919346	0.995832	4632428N05Rik
49.6033	-0.66658	0.596906	-1.11673	0.264112	0.830142	4732471J01Rik
11.4596	-0.148485	1.71334	-0.0866638	0.930939	0.996314	4732491K20Rik
19.47	-0.2606	1.28882	-0.2022	0.839761	0.990882	4831440E17Rik
7.11965	-1.02638	2.9701	-0.345569	0.729666		4833411C07Rik
92.4139	0.458687	0.524296	0.874862	0.381649	0.896481	4833420G17Rik
14.8397	-0.408619	1.24518	-0.32816	0.742791	0.982827	4833422C13Rik
180.306	-0.121682	0.308946	-0.393863	0.693682	0.978733	4833439L19Rik
15.7661	0.499199	1.34215	0.371938	0.709939	0.980448	4921504A21Rik
4.78445	-5.56721	4.12882	-1.34838	0.177537		4921509O07Rik
147.982	0.296661	0.39057	0.759558	0.447519	0.926485	4921524J17Rik
9.07861	-5.02486	2.52024	-1.9938	0.0461736		4921531C22Rik
73.1835	-0.00178296	0.524091	-0.003402	0.997286	0.999692	4930402H24Rik
14.2936	0.873484	1.28656	0.678929	0.497183	0.941676	4930429B21Rik
195.949	-0.0776697	0.310379	-0.250242	0.8024	0.987174	4930430F08Rik
31.6225	-0.389317	0.901132	-0.432031	0.665719	0.973984	4930447C04Rik
38.6371	0.262965	0.830201	0.316748	0.751434	0.982938	4930447M23Rik
15.4018	0.801061	1.95651	0.409433	0.682222	0.976839	4930452B06Rik
32.8839	1.82487	0.776031	2.35154	0.0186958	0.324944	4930453N24Rik
8.66875	-2.69245	2.15123	-1.25159	0.210719		4930469G21Rik
6.06044	1.78656	3.19494	0.559184	0.576036		4930480K23Rik
9.59009	0.00150702	2.16782	0.000695176	0.999445	0.999692	4930503L19Rik
6.05611	-0.0934343	3.20138	-0.0291856	0.976717		4930519F16Rik
7.42669	-0.862984	2.90605	-0.296961	0.766496		4930523C07Rik
11.7213	2.17878	1.72435	1.26354	0.206396	0.770231	4930526I15Rik
5.21089	-0.617514	2.94913	-0.209388	0.834145		4930553C11Rik
8.51386	6.73233	3.10667	2.16706	0.0302304		4930563E22Rik
5.39515	0.906616	3.38694	0.26768	0.788945		4930568G15Rik
30.8301	-0.109475	1.11456	-0.0982228	0.921755	0.995886	4930570G19Rik
4.36842	-5.43594	4.34304	-1.25164	0.2107		4930579K19Rik
36.1712	1.0737	0.713794	1.50422	0.132525	0.6825	4931406C07Rik
81.7678	-1.29741	0.470123	-2.75973	0.00578493	0.167189	4931406P16Rik
5.104	-0.0275422	2.47312	-0.0111366	0.991114		4931408D14Rik
6.27031	-0.424439	2.23393	-0.189996	0.849312		4931428F04Rik
8.91295	6.79939	2.46888	2.75404	0.00588637		4931440P22Rik
28.2544	0.148519	2.80988	0.0528559	0.957847	0.998948	4932416H05Rik
454.246	0.279593	0.244773	1.14225	0.253348	0.817179	4932438A13Rik
29.5997	-2.3265	1.21534	-1.91428	0.0555838	0.512533	4932438H23Rik
9.45517	2.33528	1.81764	1.28479	0.198867	0.765049	4933404O12Rik
6.9657	-2.51756	2.44357	-1.03028	0.302878		4933408J17Rik
5.97009	-2.74465	3.22067	-0.8522	0.394103		4933412E12Rik
9.0837	0.897147	2.17388	0.412693	0.679831		4933412O06Rik
29.0026	0.492684	0.947173	0.520163	0.60295	0.962925	4933421O10Rik
52.5505	-0.612897	0.711296	-0.861661	0.388874	0.899382	4933427D14Rik
47.654	1.97913	0.693279	2.85474	0.00430726	0.141716	4933431E20Rik
463.976	0.400406	0.266193	1.5042	0.132531	0.6825	4933434E20Rik
44.6732	-1.17454	0.629457	-1.86596	0.0620467	0.533516	5031426D15Rik
24.6957	-1.74005	0.966357	-1.80062	0.0717623	0.558036	5031439G07Rik
37.1264	-2.85138	0.854823	-3.33563	0.000851059	0.052079	5330417C22Rik
66.3995	0.546106	0.79569	0.686329	0.492505	0.941676	5330434G04Rik
10.3565	0.0551687	2.06427	0.0267255	0.978679	0.998948	5430402O13Rik
57.1769	-0.138463	0.699285	-0.198007	0.84304	0.990882	5430405H02Rik
45.4755	0.458454	0.814786	0.562668	0.573661	0.956456	5430416N02Rik
23.0247	1.68615	1.13616	1.48409	0.137786	0.687506	5530601H04Rik
14.8508	-0.594563	1.69914	-0.349921	0.726398	0.980448	5730408K05Rik
76.6851	0.500748	0.543747	0.92092	0.357092	0.883705	5730409E04Rik
268.266	-0.628845	0.338121	-1.85982	0.0629107	0.533923	5730455P16Rik
9.53042	0.491946	2.608	0.188629	0.850383	0.991897	5730480H06Rik
15.9869	1.47733	1.33851	1.10372	0.269717	0.833103	5730508B09Rik
26.7637	-1.39554	0.866303	-1.61091	0.107199	0.63681	5730522E02Rik
17.1898	-0.153628	1.19068	-0.129025	0.897338	0.994243	5830417I10Rik
6.37764	-5.98075	2.92101	-2.04749	0.0406099		5830454E08Rik
16.4992	0.0557936	1.36099	0.0409949	0.9673	0.998948	5930403L14Rik
6.60638	0.714076	3.06621	0.232885	0.815851		5930412G12Rik
16.8774	1.07785	1.46858	0.733945	0.462982	0.931575	5930430L01Rik
6.717	-6.05601	2.83116	-2.13906	0.0324311		6030408B16Rik
23.2893	-1.76171	1.05091	-1.67636	0.0936682	0.6136	6030419C18Rik
49.2552	-0.396217	0.635713	-0.623263	0.533112	0.948218	6030458C11Rik
148.788	0.262438	0.366521	0.716024	0.473976	0.936977	6330403A02Rik
361.231	0.20276	0.327803	0.618542	0.536218	0.94852	6330403K07Rik
5.97334	-4.31821	3.36364	-1.28379	0.199215		6330415B21Rik
5.2916	-0.0823279	3.42171	-0.0240604	0.980804		6330415G19Rik
4.80363	-5.57319	3.60611	-1.54549	0.122228		6330416G13Rik
11.1809	1.238	1.57033	0.788367	0.430482	0.922829	6330418K02Rik
4.57788	-2.7834	3.19415	-0.871406	0.383533		6330549D23Rik
158.608	-0.713801	0.32874	-2.17132	0.029907	0.396673	6430548M08Rik
7.69611	1.26234	2.52257	0.500419	0.61678		6430571L13Rik
30.1394	-0.112383	0.838977	-0.133953	0.89344	0.994243	6430573F11Rik
17.5743	-1.18716	1.17142	-1.01344	0.310849	0.861685	6530402F18Rik
21.0133	-0.194277	1.01168	-0.192034	0.847715	0.991127	6530403H02Rik
7.92951	-3.74825	2.10459	-1.78099	0.0749147		6820408C15Rik
10.7157	0.15487	1.63438	0.0947574	0.924508	0.995886	6820431F20Rik
18.7161	-1.93909	1.51224	-1.28227	0.19975	0.765049	8030462N17Rik
90.5915	0.0666175	0.495782	0.134368	0.893111	0.994243	8430419L09Rik
41.874	-0.240439	0.76528	-0.314184	0.753381	0.983375	8430429K09Rik
8.89459	-0.224592	2.68674	-0.083593	0.93338		8430431K14Rik
6.48156	4.86287	2.73931	1.77521	0.0758628		9030612E09Rik
11.5764	0.754638	1.94538	0.387913	0.698081	0.97891	9030617O03Rik
74.0403	0.190427	0.572893	0.332395	0.739591	0.982722	9030624J02Rik
7.82829	-1.74194	2.81982	-0.617748	0.536741		9130019O22Rik
6.98536	0.477711	2.64345	0.180715	0.856591		9130023H24Rik
42.7294	-0.513952	0.839729	-0.612045	0.540508	0.949641	9130024F11Rik
11.3338	0.153799	1.56471	0.0982928	0.9217	0.995886	9130221H12Rik
96.524	1.02519	0.513393	1.99688	0.045838	0.47054	9130401M01Rik
12.0944	-2.57012	1.79912	-1.42855	0.153134	0.709359	9230110C19Rik
65.6927	0.297977	0.707588	0.421117	0.673669	0.974626	9230114K14Rik
10.8114	-0.506861	1.63509	-0.30999	0.756568	0.984256	9330020H09Rik
14.8748	0.446775	1.57156	0.284287	0.776191	0.986234	9330102E08Rik
16.293	0.549698	1.7223	0.319166	0.749601	0.982938	9330133O14Rik
15.2723	-0.913061	1.35803	-0.672341	0.501367	0.941676	9330151L19Rik
267.953	-0.571253	0.254871	-2.24134	0.025004	0.368391	9330159F19Rik
6.88316	1.8921	2.44106	0.775114	0.438272		9330159M07Rik
26.6554	0.199563	0.961496	0.207555	0.835577	0.990873	9330182L06Rik
5.1114	-1.92325	2.55942	-0.751439	0.452388		9430015G10Rik
50.0331	1.33795	0.62194	2.15126	0.0314558	0.402873	9430016H08Rik
81.3748	0.226378	0.588619	0.384592	0.70054	0.97891	9430020K01Rik
26.5098	0.777044	1.1563	0.672009	0.501578	0.941676	9430038I01Rik
13.8269	7.43313	2.04729	3.63072	0.000282636	0.0231146	9430060I03Rik
19.5232	1.15906	1.56978	0.738358	0.460297	0.931575	9430065F17Rik
11.3302	2.0021	1.8871	1.06094	0.288717	0.85067	9430083A17Rik
6.00748	-0.938494	2.64715	-0.35453	0.722942		9430091E24Rik
27.2661	-0.829165	1.06139	-0.781208	0.43468	0.923703	9530059O14Rik
5.63747	2.38927	2.78837	0.856867	0.391518		9530062K07Rik
32.4815	-1.29074	0.943621	-1.36785	0.171358	0.736291	9530068E07Rik
22.1226	1.35199	1.08416	1.24703	0.212385	0.777757	9530077C05Rik
15.0785	-1.05888	1.97751	-0.535459	0.592332	0.961915	9530080O11Rik
6.65497	-0.60785	2.57184	-0.236348	0.813162		9530082P21Rik
26.7561	0.135269	0.942011	0.143596	0.88582	0.993576	9530091C08Rik
17.6507	-1.71194	1.51936	-1.12675	0.259848	0.825292	9630013A20Rik
14.9336	-0.252249	1.77434	-0.142165	0.88695	0.993908	9830147E19Rik
6.15016	-0.236007	3.16598	-0.0745448	0.940577		9830166K06Rik
5.65766	2.14771	3.28597	0.653598	0.513371		9930014A18Rik
205.092	0.445374	0.297227	1.49843	0.134022	0.684084	9930021J03Rik
5.69132	0.937139	2.38611	0.392748	0.694506		9930104L06Rik
35.572	-1.50376	0.853336	-1.76221	0.0780335	0.57768	A130010J15Rik
5.64369	6.14246	3.76252	1.63254	0.102566		A130077B15Rik
7.85449	0.129173	2.83504	0.0455629	0.963659		A230001M10Rik
9.7855	-6.59794	2.4027	-2.74605	0.00603182	0.170635	A230009B12Rik
133.547	0.0825186	0.448416	0.184022	0.853996	0.991897	A230046K03Rik
22.2112	0.177348	1.11024	0.159739	0.873087	0.992252	A230050P20Rik
12.6506	-0.641922	2.10443	-0.305033	0.760341	0.984336	A230056J06Rik
23.3614	1.30367	1.34125	0.971978	0.331061	0.871006	A230057D06Rik
10.2323	-0.801757	1.70339	-0.470683	0.637867	0.971432	A230065H16Rik
62.0696	0.319135	0.600156	0.531753	0.594897	0.962155	A230070E04Rik
24.6729	0.764112	1.02317	0.746808	0.455179	0.928984	A230072C01Rik
12.1956	1.2916	1.46706	0.880402	0.378641	0.896257	A330009N23Rik
36.0357	-0.738247	0.773548	-0.954364	0.339899	0.876169	A330023F24Rik
22.0032	-0.558617	1.1373	-0.491178	0.623301	0.965238	A330048O09Rik
104.358	-0.0849953	0.497688	-0.17078	0.864397	0.992252	A330050F15Rik
40.6297	0.402802	0.687526	0.585872	0.557962	0.95388	A330069E16Rik
12.0315	-0.323306	1.75952	-0.183747	0.854212	0.991897	A330070K13Rik
100.978	0.163335	0.423017	0.386119	0.699409	0.97891	A330076H08Rik
28.9503	-0.226296	0.998506	-0.226635	0.820707	0.990038	A330102I10Rik
181.716	0.037107	0.303283	0.122351	0.902621	0.994243	A430005L14Rik
28.3636	2.43268	1.12589	2.16067	0.0307205	0.39971	A430033K04Rik
28.4624	-0.71051	1.26782	-0.56042	0.575193	0.956459	A430035B10Rik
7.82043	5.10399	2.48658	2.05262	0.0401097		A430046D13Rik
10.1426	0.759651	1.84151	0.412515	0.679962	0.975798	A530058N18Rik
7.79391	4.02565	2.86563	1.4048	0.16008		A630072M18Rik
15.1836	0.449164	1.31492	0.34159	0.732659	0.981346	A630089N07Rik
157.325	0.741957	0.347587	2.13459	0.0327943	0.408317	A730017C20Rik
14.581	1.91117	1.28301	1.48959	0.136332	0.687506	A730017L22Rik
24.612	0.0370039	0.955425	0.0387303	0.969105	0.998948	A730020E08Rik
5.67976	-5.81308	3.77718	-1.539	0.123805		A730020M07Rik
4.78445	-5.56721	4.12882	-1.34838	0.177537		A730036I17Rik
18.1614	-2.00697	1.47127	-1.36411	0.172532	0.73766	A730056A06Rik
375.71	0.19597	0.221264	0.885686	0.375787	0.895403	A830010M20Rik
12.0063	2.05221	1.54519	1.32813	0.184136	0.753373	A830011K09Rik
226.301	0.223795	0.434222	0.515393	0.606279	0.962925	A830018L16Rik
58.9623	1.46125	0.741299	1.9712	0.0487009	0.482024	A830080D01Rik
28.1277	1.54676	1.01364	1.52594	0.127025	0.675252	A830082K12Rik
67.3165	0.156576	0.585033	0.267637	0.788979	0.987174	A830082N09Rik
5.72563	0.366171	3.29011	0.111294	0.911383		A930003A15Rik
94.1258	-0.266216	0.46862	-0.568085	0.569977	0.955175	A930005H10Rik
4.81899	-1.45787	3.58603	-0.406541	0.684345		A930006K02Rik
7.72937	0.888922	2.34288	0.379414	0.704381		A930012L18Rik
11.1516	-1.12081	2.02729	-0.552861	0.580359	0.957776	A930013F10Rik
16.3858	1.42666	1.37639	1.03652	0.299961	0.85517	A930017M01Rik
15.9617	0.21627	1.18253	0.182887	0.854887	0.991897	AA387883
11.516	-2.2493	1.63783	-1.37334	0.169647	0.735318	AA388235
14.4761	2.11468	1.6598	1.27406	0.202643	0.765049	AA415398
6.7288	-0.636243	2.51235	-0.253246	0.800078		Aaas
36.2793	0.8637	0.730797	1.18186	0.237261	0.800363	Aacs
116.395	0.224488	0.459799	0.488231	0.625386	0.966182	Aagab
431.942	-0.0443279	0.252508	-0.17555	0.860647	0.992145	Aak1
290.818	0.095365	0.397159	0.240118	0.810239	0.987174	Aamdc
319.71	0.535941	0.339051	1.58071	0.113944	0.647211	Aamp
45.1945	1.6526	0.660075	2.50365	0.012292	0.258564	Aar2
15.9133	-0.495133	1.2422	-0.398593	0.690193	0.978472	Aard
129.876	-0.380494	0.377629	-1.00759	0.313654	0.862865	Aars
20.9177	0.642957	1.01903	0.630952	0.528072	0.94819	Aars2
100.928	0.0601933	0.54185	0.111088	0.911546	0.994243	Aarsd1
185.002	0.460462	0.352212	1.30734	0.191096	0.757694	Aasdhppt
4.99533	-5.62868	3.33709	-1.6867	0.0916603		Aass
10.3927	0.253323	2.03868	0.124258	0.901111	0.994243	Aatf
35.8638	-0.0323898	0.769677	-0.0420823	0.966433	0.998948	Aatk
394.875	-0.437201	0.787396	-0.555249	0.578724	0.957281	Abat
71.8398	1.10717	0.594295	1.863	0.0624628	0.533516	Abca1
165.936	0.483784	0.395556	1.22305	0.221311	0.78768	Abca2
31.4304	-1.59871	0.8661	-1.84588	0.06491	0.539637	Abca3
211.591	-0.127197	0.444158	-0.286378	0.774588	0.986234	Abca5
13.3098	2.77739	1.5111	1.83798	0.0660647	0.540667	Abca6
28.6119	2.26227	1.05838	2.13749	0.0325583	0.407914	Abca8a
19.013	0.716302	1.18733	0.603288	0.546317	0.9514	Abca8b
12.9455	-0.57248	1.36574	-0.419173	0.675089	0.974626	Abca9
30.2627	0.810452	0.856343	0.946411	0.343939	0.879153	Abcb10
29.4136	-0.283443	1.09685	-0.258416	0.796086	0.987174	Abcb1a
12.1607	-0.542409	1.41267	-0.383959	0.701009	0.979085	Abcb1b
4.76958	-2.85118	3.03058	-0.940805	0.346805		Abcb4
11.9147	0.701576	1.91271	0.366797	0.71377	0.980448	Abcb6
73.6019	0.292187	0.47935	0.609549	0.542161	0.950201	Abcb7
28.2117	-0.573006	0.919831	-0.622947	0.533319	0.948218	Abcb8
21.9599	1.78922	1.15938	1.54326	0.122769	0.665936	Abcb9
9.27771	1.55888	1.72961	0.901292	0.367433	0.888861	Abcc1
6.7631	0.406833	2.60837	0.155972	0.876055		Abcc10
5.58859	-0.78172	3.32052	-0.235421	0.813882		Abcc4
199.319	-0.116683	0.351336	-0.332112	0.739805	0.982722	Abcc5
25.4645	-0.120171	1.00054	-0.120107	0.904398	0.994243	Abcc8
5.53816	-1.47836	2.94899	-0.50131	0.616153		Abcc9
5.46603	-5.7595	3.267	-1.76294	0.0779114		Abcd1
90.3822	-0.676828	0.450007	-1.50404	0.132571	0.6825	Abcd2
139.526	-0.393198	0.386582	-1.01711	0.309099	0.860731	Abcd3
8.57213	-0.0205829	2.30357	-0.00893521	0.992871		Abcd4
292.34	0.273173	0.296516	0.921277	0.356906	0.883644	Abce1
179.19	0.00195005	0.311618	0.0062578	0.995007	0.999692	Abcf1
131.146	1.01229	0.40694	2.48758	0.0128616	0.265363	Abcf2
99.5179	0.0504263	0.410198	0.122932	0.902161	0.994243	Abcf3
102.423	-0.356908	0.456227	-0.782305	0.434035	0.923703	Abcg1
22.7736	-0.956324	1.08821	-0.878802	0.379509	0.896481	Abcg2
16.839	0.500388	1.43682	0.34826	0.727645	0.980448	Abcg4
15.3603	6.12954	1.99482	3.07273	0.00212111	0.0988932	Abhd1
46.4054	-1.47319	0.666896	-2.20902	0.0271731	0.380453	Abhd10
25.5908	-0.998652	1.21856	-0.819535	0.412481	0.914859	Abhd11
332.633	-0.0564265	0.264285	-0.213506	0.830932	0.990516	Abhd12
69.6746	0.54969	0.521521	1.05401	0.291877	0.851172	Abhd13
44.8256	-0.986621	0.789463	-1.24974	0.211396	0.777033	Abhd14a
11.347	2.62594	1.86888	1.40509	0.159995	0.719475	Abhd14b
67.0644	-0.235537	0.56004	-0.420571	0.674068	0.974626	Abhd16a
283.298	-0.483116	0.258155	-1.87142	0.0612873	0.533516	Abhd17a
144.359	0.279687	0.366024	0.764123	0.444794	0.926485	Abhd17b
66.4976	-1.71498	0.596234	-2.87636	0.00402291	0.139764	Abhd17c
5.12309	0.595565	3.47675	0.171299	0.863989		Abhd2
76.3695	0.14873	0.541148	0.274841	0.783438	0.986311	Abhd3
35.4094	0.324043	0.819101	0.395608	0.692394	0.978733	Abhd4
35.7127	0.622235	0.804606	0.773342	0.43932	0.92576	Abhd5
278.744	-0.226395	0.285701	-0.792418	0.428117	0.921142	Abhd6
127.223	0.948385	0.451044	2.10265	0.0354967	0.421499	Abhd8
458.576	-0.0268996	0.252102	-0.106701	0.915026	0.994857	Abi1
558.017	0.169722	0.207181	0.819194	0.412676	0.914884	Abi2
8.87308	6.79453	2.4761	2.74404	0.00606873		Abi3bp
23.807	-0.7631	1.29689	-0.588409	0.556258	0.95388	Abl1
118.144	-0.321024	0.417233	-0.769412	0.441649	0.926485	Abl2
115.894	-0.0445218	0.436734	-0.101943	0.918802	0.995723	Ablim1
32.8855	-0.075274	0.745277	-0.101001	0.919549	0.995832	Ablim2
13.2287	1.88789	1.53165	1.23259	0.21773	0.782785	Ablim3
318.781	-0.00381439	0.302187	-0.0126226	0.989929	0.999664	Abr
148.166	0.445772	0.341028	1.30714	0.191165	0.757694	Abracl
61.2119	0.605713	0.582316	1.04018	0.298257	0.854226	Abt1
17.0187	1.60538	1.21138	1.32525	0.185088	0.754091	Abtb1
18.442	1.61841	1.53798	1.0523	0.292663	0.851172	Acaa1a
40.4819	0.18519	0.759097	0.243961	0.807261	0.987174	Acaa2
50.5627	1.62524	0.625719	2.59739	0.00939348	0.223822	Acaca
34.5847	0.31406	0.731396	0.429398	0.667634	0.973995	Acad11
26.3529	0.357341	1.09024	0.327763	0.743091	0.982869	Acad8
48.2151	-0.206817	0.625933	-0.330414	0.741087	0.982722	Acad9
64.737	0.903092	0.626644	1.44116	0.149541	0.703557	Acadl
155.837	0.206	0.329098	0.625952	0.531346	0.948218	Acadm
160.669	0.577038	0.330235	1.74735	0.0805761	0.585285	Acadsb
52.9815	1.06489	0.667174	1.59612	0.110462	0.643555	Acadvl
251.695	-0.221352	0.286198	-0.773422	0.439273	0.92576	Acap2
81.9547	-1.21233	0.511602	-2.36968	0.0178033	0.317452	Acap3
382.94	0.261788	0.29934	0.87455	0.381819	0.896481	Acat1
45.8735	1.23738	0.689374	1.79494	0.0726634	0.561395	Acat2
134.326	0.224444	0.51693	0.434186	0.664153	0.973984	Acbd3
42.9109	-1.06434	0.683095	-1.55812	0.119206	0.65892	Acbd4
229.431	-0.175022	0.274972	-0.636509	0.524444	0.947696	Acbd5
149.097	0.327158	0.365756	0.894468	0.371071	0.891664	Acbd6
8.42799	2.24991	2.34299	0.960276	0.336917		Acbd7
9.34142	0.167902	2.10484	0.0797696	0.936421	0.997093	Acd
10.2127	5.54002	2.70078	2.05127	0.0402409	0.448648	Ace
6.16521	6.26672	3.60858	1.73662	0.0824551		Acer2
90.9299	0.574444	0.451395	1.2726	0.203161	0.765049	Acer3
6.8254	-0.831967	2.56482	-0.324377	0.745653		Ache
221.939	0.464455	0.348242	1.33371	0.182298	0.750669	Acin1
13.9638	0.738954	1.80973	0.408323	0.683037	0.976839	Ackr1
11.3952	2.75974	1.83826	1.50128	0.133284	0.682904	Ackr3
83.832	-0.483981	0.544001	-0.88967	0.373643	0.892863	Acly
55.1272	1.30133	0.72618	1.79202	0.0731296	0.563784	Aco1
527.823	-0.174049	0.189481	-0.918557	0.358327	0.885095	Aco2
20.6796	0.547279	1.23168	0.444337	0.656799	0.973984	Acot1
27.2657	-0.508732	0.832632	-0.610992	0.541205	0.950086	Acot11
791.459	-0.404408	0.18114	-2.23257	0.0255775	0.370394	Acot13
87.5633	-2.01963	0.473187	-4.26814	1.9711e-05	0.0026536	Acot2
6.54447	-6.01925	2.94173	-2.04616	0.0407406		Acot4
9.50477	-0.842378	1.71561	-0.491009	0.62342	0.965238	Acot5
382.319	-0.352202	0.222072	-1.58598	0.112744	0.646036	Acot7
14.5287	0.26037	1.33116	0.195597	0.844926	0.991099	Acot8
36.9001	0.740793	0.723089	1.02448	0.305607	0.86025	Acot9
169.266	-0.176518	0.425063	-0.415275	0.677941	0.975798	Acox1
27.7061	0.363798	1.07588	0.338138	0.735259	0.981346	Acox3
194.713	0.142219	0.31216	0.455597	0.64868	0.973963	Acp1
72.9336	-0.466357	0.523145	-0.891447	0.372689	0.892068	Acp2
20.6507	-0.298351	1.06095	-0.281211	0.778549	0.986234	Acp6
76.8299	0.229131	0.504743	0.453955	0.649861	0.973963	Acsbg1
11.247	2.739	1.85097	1.47977	0.138935	0.687746	Acsf3
69.2665	0.179407	0.546392	0.328348	0.742648	0.982827	Acsl1
663.656	-0.379353	0.255863	-1.48264	0.13817	0.68766	Acsl3
603.571	0.126079	0.203622	0.619182	0.535796	0.94852	Acsl4
55.7674	-1.12983	0.59493	-1.89911	0.0575506	0.518678	Acsl5
207.239	-0.0129363	0.423354	-0.0305567	0.975623	0.998948	Acsl6
11.7715	3.06377	1.80456	1.6978	0.0895464	0.606242	Acss1
53.8444	-0.362044	0.640999	-0.564813	0.572201	0.955681	Acss2
36.9923	-0.100215	2.92791	-0.0342276	0.972696	0.998948	Acta1
8.40635	-4.84374	2.91491	-1.66171	0.09657		Acta2
22510.4	-1.22198	0.435793	-2.80404	0.00504665	0.15485	Actb
101.427	0.0601727	0.417337	0.144183	0.885356	0.993515	Actg1
58.8232	0.0648499	0.695474	0.0932456	0.925708	0.996314	Actl6a
128.849	-0.11518	0.381947	-0.301561	0.762987	0.985614	Actl6b
218.572	1.67278	0.372263	4.49355	7.00459e-06	0.00112596	Actn1
7.52247	-4.68608	2.50443	-1.87111	0.0613292		Actn2
96.371	0.69903	0.465191	1.50267	0.132924	0.682777	Actn4
297.36	-0.0584709	0.391605	-0.149311	0.881308	0.992775	Actr10
123.815	0.333004	0.434296	0.766767	0.44322	0.926485	Actr1a
92.1613	0.177034	0.622617	0.284339	0.776151	0.986234	Actr1b
2173.62	-0.615775	0.161727	-3.8075	0.000140378	0.0138704	Actr2
351.806	0.21685	0.254768	0.851167	0.394676	0.902619	Actr3
50.6533	-0.37393	0.625597	-0.597717	0.550029	0.953253	Actr3b
6.23885	1.2149	2.77406	0.43795	0.661423		Actr5
211.408	0.53885	0.347516	1.55058	0.121003	0.662314	Actr6
59.0823	-0.479871	0.764025	-0.628083	0.52995	0.948218	Actr8
38.5674	0.324323	0.767302	0.422679	0.672529	0.974626	Acvr1
136.548	-0.285866	0.444178	-0.643584	0.519845	0.947608	Acvr1c
188.744	0.396911	0.296637	1.33804	0.180884	0.749277	Acvr2a
42.0957	1.98208	0.705362	2.81001	0.00495392	0.153757	Acvr2b
102.596	1.01662	0.401751	2.53048	0.0113907	0.249853	Acyp1
237.042	0.104636	0.300497	0.348211	0.727682	0.980448	Acyp2
5.22403	0.354203	3.44683	0.102762	0.918152		Ada
43.5509	-0.397947	0.695492	-0.572181	0.5672	0.954598	Adal
745.365	-0.572956	0.548279	-1.04501	0.296019	0.853567	Adam10
63.4543	0.108608	1.94741	0.0557705	0.955525	0.998948	Adam11
8.44672	4.15984	2.23625	1.86018	0.0628594		Adam12
20.0012	0.526009	1.0229	0.514233	0.607089	0.962925	Adam15
357.969	-0.338316	0.249703	-1.35488	0.175457	0.741487	Adam22
301.375	-0.899278	0.269482	-3.33707	0.000846678	0.052079	Adam23
34.9357	-1.73734	0.766548	-2.26645	0.023424	0.359368	Adam9
23.4522	0.797279	1.30451	0.61117	0.541087	0.950034	Adamts1
5.58244	-0.497345	2.76474	-0.179889	0.85724		Adamts13
9.61933	-2.37556	2.00455	-1.18508	0.235985	0.800239	Adamts2
24.0127	-0.0395335	0.900293	-0.0439118	0.964975	0.998948	Adamts20
45.8291	0.788329	0.639594	1.23255	0.217745	0.782785	Adamts3
5.37208	-1.66423	3.39464	-0.490253	0.623955		Adamts4
9.33291	1.65552	1.89116	0.875397	0.381358	0.896481	Adamts6
5.19552	-2.50942	2.92227	-0.858725	0.390492		Adamts9
9.80093	-0.766739	1.65786	-0.462486	0.643733	0.973934	Adamtsl1
6.24059	-5.95061	3.59509	-1.6552	0.0978831		Adamtsl3
65.8738	0.222275	0.518034	0.429074	0.66787	0.973995	Adap1
45.5346	-0.0118655	0.640752	-0.0185181	0.985226	0.998948	Adar
131.974	-0.0080438	0.377942	-0.0212832	0.98302	0.998948	Adarb1
32.4894	0.234238	0.819827	0.285717	0.775095	0.986234	Adarb2
9.09	1.15347	1.70239	0.677558	0.498052	0.941676	Adat2
16.863	-0.248454	1.25801	-0.197497	0.843439	0.990882	Adck1
67.0705	0.690023	0.54792	1.25935	0.207903	0.771959	Adck3
530.054	-0.695789	0.214965	-3.23676	0.00120895	0.0692572	Adcy1
122.965	0.374121	0.411197	0.909833	0.36291	0.886956	Adcy2
36.2697	0.0250369	0.929352	0.0269401	0.978507	0.998948	Adcy3
26.317	2.37416	1.07902	2.2003	0.0277858	0.38415	Adcy5
9.08209	2.34304	1.87904	1.24693	0.212421		Adcy6
12.0349	1.21152	1.89223	0.640263	0.522002	0.947608	Adcy8
130.518	-0.448718	0.417518	-1.07473	0.282497	0.847423	Adcy9
24.5798	0.811438	1.13811	0.712968	0.475866	0.936977	Adcyap1
58.5654	1.39688	0.565912	2.46837	0.0135729	0.273795	Adcyap1r1
553.993	-0.44073	0.199528	-2.20886	0.0271843	0.380453	Add1
289.511	-0.433722	0.276862	-1.56656	0.117217	0.653767	Add2
374.383	-0.170579	0.240727	-0.708597	0.478574	0.937909	Add3
223.735	0.256041	0.321662	0.795995	0.426035	0.920942	Adgra1
17.3427	2.30571	1.39349	1.65463	0.097999	0.622172	Adgra2
109.616	0.0814336	0.422152	0.192901	0.847036	0.991127	Adgrb1
128.598	0.208267	0.388676	0.535838	0.592071	0.961915	Adgrb2
213.802	0.203411	0.372533	0.546023	0.58505	0.958554	Adgrb3
7.95247	6.63734	3.18752	2.08229	0.0373157		Adgre5
59.4294	0.887325	0.596831	1.48673	0.137086	0.687506	Adgrg1
23.5188	1.25586	0.92321	1.36032	0.17373	0.738679	Adgrg2
235.883	0.772398	0.34901	2.21312	0.0268897	0.380453	Adgrl1
52.8822	-1.5843	0.586319	-2.70212	0.00688998	0.184132	Adgrl2
74.0197	-0.461555	0.534543	-0.863457	0.387886	0.899355	Adgrl3
6.11106	4.77809	2.77503	1.72181	0.0851033		Adgrl4
71.9638	-0.293373	0.775585	-0.37826	0.705238	0.980448	Adh5
43.043	-1.01376	0.860587	-1.17799	0.238802	0.800574	Adhfe1
54.6161	0.21381	0.560692	0.381333	0.702957	0.979791	Adi1
156.546	0.0632447	0.350663	0.180357	0.856872	0.991937	Adipor1
132.032	-0.727571	0.527196	-1.38008	0.167563	0.732065	Adipor2
151.403	-0.793185	0.39126	-2.02726	0.0426359	0.458705	Adk
21.8662	-2.59117	1.31975	-1.96337	0.0496029	0.485573	Adnp2
165.772	0.078052	0.336341	0.232062	0.81649	0.98949	Ado
125.001	0.150396	0.429002	0.350571	0.72591	0.980448	Adora1
18.9215	-0.893615	1.2842	-0.695852	0.486521	0.939657	Adpgk
127.605	0.549385	0.361699	1.5189	0.128787	0.677533	Adprh
26.108	1.49263	0.934374	1.59747	0.110161	0.643555	Adprm
16.0867	-0.803695	1.19961	-0.669962	0.502882	0.941676	Adra1a
11.9539	-0.832831	1.45681	-0.571679	0.567539	0.954598	Adra1d
18.7155	-2.44345	1.44896	-1.68635	0.0917291	0.611199	Adra2a
14.294	0.432281	1.79495	0.240832	0.809685	0.987174	Adra2c
40.728	-0.116595	0.732073	-0.159266	0.873459	0.992252	Adrb1
83.4748	-0.121802	0.443072	-0.274903	0.783391	0.986311	Adrbk1
136.498	0.943464	0.386339	2.44207	0.0146035	0.286911	Adrbk2
43.8811	0.152582	0.740021	0.206186	0.836646	0.990873	Adrm1
33.7058	0.201806	0.825465	0.244476	0.806863	0.987174	Adsl
216.773	0.35173	0.297243	1.18331	0.236687	0.800363	Adss
23.4011	0.800665	1.00745	0.794748	0.42676	0.920942	Adssl1
32.8756	-0.596062	2.67239	-0.223044	0.823501	0.990038	Aebp1
121.041	-0.756164	0.373865	-2.02256	0.0431188	0.459337	Aebp2
1145.94	0.0865169	0.168247	0.514224	0.607095	0.962925	Aes
12.2994	-0.441137	1.56813	-0.281315	0.778469	0.986234	AF357359
6.17618	0.23264	2.1714	0.107138	0.914679		AF357425
5.09375	0.318033	3.48856	0.0911645	0.927362		AF529169
27.4852	-1.94967	0.939601	-2.07499	0.037987	0.436732	Afap1
12.6234	-3.46911	1.73388	-2.00078	0.0454162	0.468967	Aff1
21.1308	-0.90583	1.06528	-0.850324	0.395145	0.902619	Aff2
76.4366	-0.446211	0.660046	-0.67603	0.499021	0.941676	Aff3
405.635	0.485293	0.297183	1.63298	0.102474	0.630245	Aff4
22.0149	0.275001	1.064	0.258459	0.796053	0.987174	Afg3l1
135.805	0.846375	0.36226	2.33637	0.0194717	0.332346	Afg3l2
187.095	-0.443432	0.412353	-1.07537	0.282208	0.847423	Aftph
47.1463	1.80681	0.782813	2.3081	0.0209938	0.339022	Aga
198.232	1.00421	0.295571	3.39754	0.00067995	0.0446528	Agap1
333.554	-2.16564	0.250695	-8.63854	5.69382e-18	6.13224e-15	Agap2
60.7772	-0.265705	0.585261	-0.453993	0.649834	0.973963	Agap3
10.3862	2.38657	2.47724	0.9634	0.335347	0.873352	Agbl2
48.8631	0.25877	0.737622	0.350816	0.725726	0.980448	Agbl3
14.3796	-0.819024	1.6388	-0.499771	0.617236	0.965055	Agbl4
91.9216	0.11632	0.481412	0.241623	0.809072	0.987174	Agfg1
143.999	-0.0954768	0.408465	-0.233745	0.815183	0.989081	Agfg2
151.832	0.380424	0.383096	0.993025	0.320698	0.866811	Aggf1
50.6511	-0.465541	0.676867	-0.687788	0.491587	0.941676	Agk
44.0784	0.312584	0.735054	0.425253	0.670652	0.974626	Agl
12.2739	2.0356	1.65065	1.23321	0.217496	0.782785	Agmo
62.6818	0.112624	0.548421	0.20536	0.837291	0.990873	Ago1
94.7056	0.950358	0.464056	2.04794	0.0405663	0.449484	Ago2
53.2336	0.141254	0.656607	0.215127	0.829668	0.990516	Ago3
13.7056	-0.152009	1.55001	-0.0980696	0.921877	0.995886	Ago4
177.185	-2.54648	0.372145	-6.84272	7.77047e-12	4.64933e-09	Agpat1
120.27	-0.0591	0.399066	-0.148096	0.882267	0.993	Agpat3
65.9073	-0.633372	0.663776	-0.954196	0.339984	0.876169	Agpat4
381.708	-0.325916	0.317867	-1.02532	0.305212	0.86025	Agpat5
81.2544	0.141353	0.501931	0.28162	0.778235	0.986234	Agpat6
97.1419	-0.501998	0.532875	-0.942055	0.346164	0.879473	Agps
26.2704	-0.670043	1.15429	-0.580478	0.561592	0.95388	Agrn
48.3373	-0.258885	0.751411	-0.344532	0.730447	0.981346	Agt
389.282	-0.440601	0.236419	-1.86365	0.0623715	0.533516	Agtpbp1
6.92634	6.43799	3.39742	1.89496	0.0580973		Agtrap
119.223	-0.729304	0.407677	-1.78893	0.0736265	0.563832	Ahctf1
544.586	-0.0742515	0.294868	-0.251812	0.801186	0.987174	Ahcyl1
231.902	0.631173	0.275811	2.28843	0.0221125	0.346654	Ahcyl2
23.6649	0.585168	1.05005	0.557276	0.577339	0.95712	Ahdc1
1380.56	-0.0637614	0.160105	-0.398247	0.690448	0.978472	Ahi1
47.7895	2.42353	0.6749	3.59095	0.000329477	0.0260917	Ahnak
30.0016	-0.141754	0.883963	-0.160362	0.872596	0.992252	Ahr
33.1677	0.634007	0.733699	0.864123	0.38752	0.899355	Ahsa1
41.4179	-0.605805	0.76351	-0.793448	0.427517	0.921091	Ahsa2
191.202	-0.763254	0.327699	-2.32913	0.0198523	0.333123	AI314180
467.316	0.328455	0.301039	1.09107	0.275241	0.839495	AI413582
28.9904	0.29478	0.861989	0.341976	0.732369	0.981346	AI414108
9.84294	-0.173128	2.57209	-0.0673101	0.946335	0.997645	AI429214
8.48384	-0.575976	1.85272	-0.310881	0.755891		AI450353
10.8455	-0.835825	1.80929	-0.461963	0.644108	0.973934	AI464131
109.984	0.954291	0.425188	2.2444	0.024807	0.367005	AI504432
777.815	-0.904007	0.202059	-4.47398	7.67775e-06	0.00118128	AI593442
30.4033	1.24815	1.11552	1.11889	0.263185	0.828802	AI597479
36.6901	1.44283	0.822087	1.75508	0.0792461	0.580599	AI837181
39.1084	0.749715	0.695317	1.07823	0.280929	0.846404	AI854517
14.0164	0.576157	1.79298	0.321341	0.747952	0.982938	AI854703
37.4809	-0.55334	0.830543	-0.666238	0.505259	0.941676	AI987944
58.4706	0.657285	0.68138	0.964638	0.334726	0.872669	Aida
75.5126	0.21516	0.496773	0.433115	0.664931	0.973984	Aif1
12.0436	-1.71091	1.64965	-1.03714	0.299673	0.85503	Aif1l
88.6401	0.101251	0.450898	0.224554	0.822326	0.990038	Aifm1
14.0857	2.2068	1.67796	1.31517	0.188453	0.757019	Aifm2
64.629	0.869123	0.654004	1.32893	0.183873	0.752969	Aifm3
80.9552	-0.268623	0.511162	-0.525514	0.599226	0.962925	Aig1
17.6827	-0.599133	1.63295	-0.366902	0.713692	0.980448	Aim2
256.351	-0.251253	0.335164	-0.749642	0.453471	0.928598	Aimp1
90.1036	-0.570306	1.46551	-0.389151	0.697164	0.97891	Aimp2
139.028	-0.204102	0.361413	-0.564733	0.572255	0.955681	Aip
96.4598	-1.04944	0.474929	-2.20968	0.0271273	0.380453	Ajap1
23.2157	0.618507	1.1509	0.537411	0.590984	0.960981	AK010878
172.815	0.123584	0.317956	0.388682	0.697511	0.97891	Ak1
41.6019	-1.72151	0.69751	-2.46809	0.0135837	0.273795	Ak2
140.319	0.36219	0.443122	0.817361	0.413722	0.915083	Ak3
45.2336	-0.289382	0.693329	-0.417381	0.6764	0.975726	Ak4
488.682	0.600921	0.219641	2.73592	0.00622055	0.172668	Ak5
64.7201	-0.0334334	0.548475	-0.060957	0.951393	0.998231	Ak6
7.68086	-0.181863	2.85992	-0.0635902	0.949296		Ak7
16.3527	0.118605	1.54117	0.0769576	0.938657	0.997093	Ak8
26.785	-0.211916	1.18482	-0.17886	0.858048	0.991937	Akap1
43.992	-0.786327	0.649344	-1.21096	0.225913	0.788377	Akap10
947.807	0.129494	0.193968	0.667609	0.504383	0.941676	Akap11
61.2008	-0.726859	0.687715	-1.05692	0.290549	0.851172	Akap12
73.8956	-0.254432	0.610227	-0.416947	0.676717	0.975726	Akap13
67.5192	0.732248	0.596841	1.22687	0.21987	0.785407	Akap17b
119.674	-1.4446	0.381967	-3.782	0.000155575	0.015095	Akap5
507.436	-0.225235	0.194597	-1.15744	0.247091	0.810224	Akap6
160.107	-0.260137	0.34741	-0.748788	0.453985	0.928598	Akap7
41.2917	-0.291333	0.903477	-0.322457	0.747106	0.982938	Akap8
95.3885	0.138995	0.466092	0.298213	0.765541	0.985692	Akap8l
506.192	0.212867	0.195135	1.09087	0.27533	0.839495	Akap9
21.9811	-0.414979	1.24788	-0.332548	0.739476	0.982722	Akip1
198.551	-0.308098	0.357644	-0.861468	0.388981	0.899382	Akirin1
97.2713	0.124068	0.432463	0.286887	0.774199	0.986234	Akirin2
597.381	-0.110901	0.229987	-0.482208	0.629658	0.968083	Akr1a1
34.2931	0.057301	0.729421	0.0785568	0.937385	0.997093	Akr1b10
13.6193	-1.7636	1.70866	-1.03216	0.301999	0.855784	Akr1c18
84.6666	-0.690082	0.515167	-1.33953	0.180398	0.749149	Akr1e1
39.111	-0.158049	0.955572	-0.165397	0.868631	0.992252	Akr7a5
65.1964	0.202183	0.552398	0.366009	0.714358	0.980448	Akt1
7.76421	5.13072	2.48669	2.06327	0.0390867		Akt1s1
37.5726	-2.7019	0.896156	-3.01499	0.00256988	0.10839	Akt2
226.761	0.569189	0.322673	1.76398	0.077735	0.576588	Akt3
444.522	-0.20044	0.213516	-0.938759	0.347855	0.880262	Aktip
36.3197	-0.592183	0.699157	-0.846994	0.396998	0.903756	Alad
65.7655	0.130422	0.58873	0.221531	0.824679	0.990038	Alas1
639.772	-0.123606	0.267279	-0.462461	0.643751	0.973934	Alcam
8.14116	-2.08808	2.23284	-0.935167	0.349702		Aldh18a1
73.1812	0.0442353	0.652062	0.0678391	0.945914	0.9976	Aldh1a1
9.14454	0.693628	2.18597	0.317308	0.75101	0.982938	Aldh1a2
5.04541	-4.06315	3.23335	-1.25664	0.208886		Aldh1b1
65.1125	-0.193431	0.583416	-0.33155	0.740229	0.982722	Aldh1l1
33.466	-0.893804	0.939067	-0.9518	0.341198	0.876738	Aldh2
37.0471	0.232497	1.01789	0.228412	0.819326	0.990038	Aldh3a2
10.7519	-0.372364	1.99463	-0.186683	0.851909	0.991897	Aldh3b2
6.03946	-3.40232	2.65901	-1.27954	0.200706		Aldh4a1
55.95	-0.671133	0.608137	-1.10359	0.269772	0.833103	Aldh5a1
96.9481	0.412264	0.50072	0.823344	0.410313	0.914269	Aldh6a1
107.1	0.42732	0.394648	1.08279	0.278902	0.844469	Aldh7a1
41.2536	-1.54959	0.673776	-2.29986	0.021456	0.341835	Aldh9a1
3856.17	0.00873145	0.161746	0.0539825	0.956949	0.998948	Aldoa
1075.65	0.13389	0.160777	0.832768	0.404976	0.911258	Aldoc
36.8054	-0.276819	0.717655	-0.385726	0.699699	0.97891	Alg1
9.00236	-6.47955	2.6178	-2.47519	0.0133166		Alg10b
114.06	-0.0257438	0.499224	-0.0515677	0.958873	0.998948	Alg11
6.16521	6.26672	3.60858	1.73662	0.0824551		Alg12
16.0395	-0.0345256	4.5761	-0.00754477	0.99398	0.999692	Alg13
55.0145	0.824606	0.566688	1.45513	0.145633	0.69927	Alg14
84.4398	-0.350939	0.448433	-0.78259	0.433868	0.923703	Alg2
12.3672	2.67828	1.88096	1.42389	0.154479	0.71191	Alg3
67.0258	0.328704	0.651318	0.504675	0.613787	0.96498	Alg5
34.8012	-0.956043	0.810951	-1.17892	0.238432	0.800574	Alg6
7.60469	-0.0465072	2.49088	-0.018671	0.985104		Alg8
8.37785	-0.723257	2.38309	-0.303495	0.761512		Alg9
5.62312	0.544159	3.308	0.164498	0.869339		Alk
8.43223	-0.792002	2.22145	-0.356524	0.721448		Alkbh1
8.8291	-0.895166	2.18133	-0.410375	0.681531		Alkbh2
8.42784	1.60188	2.30955	0.69359	0.487939		Alkbh3
378.606	-0.730036	0.268245	-2.72153	0.00649811	0.178532	Alkbh5
184.166	-0.455687	0.302104	-1.50838	0.131457	0.680151	Alkbh6
105.434	-1.01032	0.524764	-1.92528	0.0541941	0.504469	Alkbh7
33.3542	-0.281321	0.759217	-0.370541	0.710979	0.980448	Alkbh8
15.0242	-0.45037	1.38401	-0.325409	0.744872	0.982887	Alms1
7.95342	-3.02156	2.81942	-1.0717	0.283856		Alox12b
9.99154	-0.993458	2.544	-0.390509	0.69616	0.97891	Alox5ap
6.72337	-1.74088	2.45766	-0.708349	0.478729		Alox8
6.77003	0.36879	3.04091	0.121276	0.903472		Alpl
121.311	-0.251925	0.41504	-0.60699	0.543858	0.950549	Alyref
14.5977	-1.87112	1.5016	-1.24609	0.212733	0.777975	Alyref2
33.0532	-0.116334	0.859727	-0.135315	0.892363	0.994243	Amacr
29.2404	-0.346079	0.79581	-0.434876	0.663652	0.973984	Ambra1
32.4587	0.835729	0.886784	0.942426	0.345974	0.879473	Amdhd2
17.325	-0.809653	1.2737	-0.635669	0.524992	0.947696	Amer1
62.7698	-0.160795	0.569142	-0.282522	0.777543	0.986234	Amer2
18.9206	0.987641	1.08938	0.906612	0.364612	0.887416	Amer3
161.622	-0.115664	0.363137	-0.318513	0.750096	0.982938	Amfr
5.90695	-5.86966	3.70272	-1.58523	0.112915		Amhr2
44.5618	0.899987	0.752507	1.19598	0.231702	0.796306	Amigo1
30.9102	0.387086	0.945103	0.40957	0.682121	0.976839	Amigo2
7.55993	0.111718	2.41905	0.0461825	0.963165		Ammecr1
36.6532	-0.0923384	0.762649	-0.121076	0.903631	0.994243	Ammecr1l
30.0945	1.59321	4.57148	0.34851	0.727457	0.980448	Amn
77.4625	0.3343	0.687589	0.486192	0.626831	0.966486	Amn1
38.3861	0.502258	1.14972	0.436852	0.662219	0.973984	Amot
26.6864	1.20455	1.19079	1.01155	0.311751	0.862481	Amotl1
32.4981	-0.24279	2.75002	-0.0882864	0.929649	0.996314	Amotl2
28.004	-0.368656	0.938051	-0.393002	0.694318	0.978865	Ampd2
35.0289	0.0414785	0.786489	0.0527389	0.95794	0.998948	Ampd3
189.879	0.529954	0.306784	1.72745	0.084087	0.59344	Amph
11.7875	-0.334594	1.64603	-0.203274	0.838921	0.990882	Amy1
68.762	-0.85509	0.587019	-1.45666	0.145209	0.698482	Amz2
52.1434	1.14726	0.683758	1.67787	0.0933716	0.6136	Anapc1
107.224	1.06482	0.476104	2.23652	0.0253176	0.369924	Anapc10
547.988	-0.118017	0.226234	-0.521658	0.601908	0.962925	Anapc11
360.765	0.489212	0.225067	2.17363	0.029733	0.395338	Anapc13
31.6264	0.124442	0.803092	0.154954	0.876858	0.992252	Anapc15
249.098	0.25492	0.286809	0.888814	0.374103	0.89317	Anapc16
112.318	0.23887	0.433045	0.551605	0.581219	0.957776	Anapc2
235.407	-0.0447344	0.274112	-0.163197	0.870363	0.992252	Anapc4
104.715	0.105345	0.453221	0.232437	0.816199	0.989477	Anapc5
50.8911	0.498972	0.792495	0.629622	0.528942	0.94819	Anapc7
24.0072	2.08101	1.3765	1.51181	0.130582	0.679076	Ang
9.07154	0.240409	2.36096	0.101827	0.918894		Angel1
193.697	-0.198967	0.300749	-0.661573	0.508245	0.944084	Angel2
22.5616	-0.198938	1.05259	-0.188999	0.850093	0.991897	Angpt1
4.99247	-5.62862	4.03437	-1.39517	0.162965		Angptl1
8.26002	2.78899	2.42469	1.15025	0.250043		Angptl2
28.3693	0.408056	0.924202	0.441523	0.658835	0.973984	Angptl6
179.897	0.01651	0.375785	0.0439348	0.964956	0.998948	Ank
31.2962	0.592229	0.801593	0.738815	0.460019	0.931575	Ank1
499.971	-0.208868	0.194635	-1.07312	0.283215	0.847423	Ank2
814.072	-0.401828	0.15866	-2.53264	0.0113208	0.249335	Ank3
67.3911	0.0858332	0.52526	0.163411	0.870195	0.992252	Ankfy1
166.901	-0.136955	0.427597	-0.32029	0.748749	0.982938	Ankhd1
180.585	-0.256147	0.379873	-0.674298	0.500122	0.941676	Ankib1
78.0987	0.280399	0.49985	0.560966	0.574821	0.956459	Ankle2
75.2769	0.449691	0.560374	0.802485	0.422273	0.919363	Ankmy2
298.089	0.462591	0.244541	1.89167	0.0585351	0.52302	Ankra2
47.0109	0.241642	0.713479	0.338681	0.73485	0.981346	Ankrd10
225.638	-0.0518636	0.365709	-0.141817	0.887225	0.993975	Ankrd11
1218.2	-0.455169	0.146752	-3.10162	0.00192463	0.0929519	Ankrd12
38.8825	-0.109646	0.781686	-0.140268	0.888448	0.994242	Ankrd13a
14.275	-5.6548	1.95751	-2.88878	0.00386742	0.137014	Ankrd13b
34.5861	-1.6517	0.759853	-2.17372	0.0297265	0.395338	Ankrd13c
22.0901	-0.197932	1.14922	-0.172232	0.863255	0.992252	Ankrd13d
6.39289	-1.30717	2.2304	-0.586067	0.557831		Ankrd16
308.699	-0.60376	0.259188	-2.32943	0.0198361	0.333123	Ankrd17
27.1971	1.70638	1.16354	1.46653	0.142503	0.693205	Ankrd24
108.333	1.00582	0.435561	2.30925	0.0209296	0.339022	Ankrd26
17.6586	-0.657766	1.20718	-0.544877	0.585838	0.958886	Ankrd27
48.0597	-2.03475	0.652456	-3.1186	0.00181712	0.0893627	Ankrd28
107.219	0.252369	0.440243	0.573249	0.566476	0.954598	Ankrd29
96.3929	-0.0945597	0.604048	-0.156543	0.875605	0.992252	Ankrd32
117.468	-1.34281	0.43814	-3.0648	0.00217816	0.0989821	Ankrd33b
39.8825	0.658691	0.770731	0.854632	0.392755	0.901554	Ankrd34a
55.3829	-1.54989	0.66191	-2.34154	0.0192045	0.330684	Ankrd34b
16.2502	0.74684	1.52718	0.489032	0.624819	0.966159	Ankrd35
16.0418	1.76364	1.30012	1.35652	0.174934	0.741095	Ankrd37
12.5879	-0.559294	1.95395	-0.286237	0.774696	0.986234	Ankrd39
92.3014	0.647691	0.520426	1.24454	0.213301	0.779124	Ankrd40
8.43567	0.962145	2.30519	0.417382	0.676399		Ankrd42
7.77759	3.02251	2.52194	1.19848	0.230729		Ankrd44
103.026	0.139666	0.496799	0.281132	0.778609	0.986234	Ankrd45
211.286	0.0374412	0.342626	0.109277	0.912983	0.99455	Ankrd46
68.9304	0.49816	0.499105	0.998107	0.318228	0.866157	Ankrd49
22.5562	1.80974	1.39967	1.29297	0.196021	0.759967	Ankrd50
8.85369	1.00367	2.67996	0.374511	0.708024		Ankrd52
17.5292	-0.393836	1.44763	-0.272057	0.785579	0.986786	Ankrd54
35.3058	0.833767	0.867846	0.960732	0.336687	0.875034	Ankrd6
20.0917	-0.304735	1.01503	-0.300222	0.764008	0.985692	Ankrd63
5.8597	0.854969	2.86015	0.298924	0.764998		Ankrd9
7.58718	-2.56279	2.18858	-1.17098	0.241605		Anks1
771.286	-0.239311	0.185508	-1.29003	0.19704	0.76171	Anks1b
25.4226	1.38956	0.993493	1.39866	0.161915	0.722695	Anks3
9.35191	6.86931	2.39659	2.86628	0.00415321	0.140474	Anks6
12.2776	-0.986362	1.83411	-0.537788	0.590723	0.960774	Ankzf1
112.41	0.385095	0.40443	0.952194	0.340999	0.876738	Anln
5.26996	-0.600166	3.01789	-0.198869	0.842365		Ano1
24.7042	1.72986	1.04084	1.66199	0.0965151	0.619412	Ano10
530.877	0.264965	0.225461	1.17521	0.23991	0.801087	Ano3
78.0528	-1.53689	0.517731	-2.96851	0.00299248	0.116886	Ano4
13.7708	0.993209	1.42822	0.695419	0.486793	0.939657	Ano5
36.1621	-0.0156519	0.840101	-0.018631	0.985135	0.998948	Ano6
9.83375	-0.38905	1.66628	-0.233484	0.815386	0.989081	Ano8
371.556	0.150182	0.247634	0.606467	0.544205	0.950549	Anp32a
130.281	0.645139	0.419307	1.53858	0.123906	0.668572	Anp32b
72.9067	-1.07276	0.564833	-1.89925	0.0575317	0.518678	Anp32e
18.364	-1.11623	1.26671	-0.881202	0.378208	0.896257	Antxr1
6.4902	6.34301	2.89217	2.19316	0.0282955		Antxr2
9.32234	-1.81597	2.61903	-0.693375	0.488074	0.940858	Anxa1
12.39	-0.132285	1.86327	-0.0709964	0.943401	0.997093	Anxa2
26.2001	0.409995	1.44941	0.28287	0.777276	0.986234	Anxa3
23.0504	3.7711	1.31864	2.85984	0.00423853	0.140892	Anxa4
87.1078	0.100028	0.465023	0.215104	0.829686	0.990516	Anxa5
49.7977	-1.59059	0.740482	-2.14804	0.0317105	0.404647	Anxa6
152.104	0.114579	0.552274	0.207467	0.835645	0.990873	Anxa7
6.01915	-2.0571	2.63683	-0.780141	0.435308		Aox1
7.64743	5.11386	3.00592	1.70126	0.0888937		Aox3
92.4905	0.381368	0.4598	0.82942	0.406867	0.912898	Ap1ar
99.465	0.035152	0.428642	0.082008	0.93464	0.996823	Ap1b1
127.687	-0.0704739	0.403088	-0.174835	0.861209	0.992215	Ap1g1
58.998	-1.61989	0.641562	-2.52492	0.0115726	0.250275	Ap1m1
454.674	0.148268	0.268201	0.552826	0.580382	0.957776	Ap1s1
140.257	-0.468773	0.360952	-1.29871	0.194042	0.759316	Ap1s2
200.083	-0.119322	0.32219	-0.370348	0.711123	0.980448	Ap2a1
1173.77	-1.28853	0.217912	-5.91308	3.35764e-09	1.16651e-06	Ap2a2
219.464	0.276357	0.28847	0.95801	0.338058	0.875631	Ap2b1
421.593	0.125904	0.23815	0.528674	0.597031	0.962612	Ap2m1
529.342	0.0326907	0.285418	0.114536	0.908813	0.994243	Ap2s1
87.1636	0.0406609	0.481158	0.0845065	0.932654	0.996496	Ap3b1
191.107	-0.351917	0.304618	-1.15527	0.247979	0.811526	Ap3b2
192.705	0.34003	0.296405	1.14718	0.251306	0.815092	Ap3d1
61.4525	0.329095	0.588568	0.559145	0.576063	0.956693	Ap3m1
145.65	-0.350925	0.355604	-0.986844	0.323719	0.867924	Ap3m2
103.756	-0.1557	0.458057	-0.339913	0.733922	0.981346	Ap3s1
62.3278	0.0297315	0.525966	0.0565275	0.954922	0.998948	Ap3s2
12.097	0.421881	1.42546	0.295961	0.76726	0.985692	Ap4b1
13.6745	0.703093	1.3036	0.539347	0.589647	0.960393	Ap4e1
182.281	-0.121118	0.312819	-0.387182	0.698622	0.97891	Ap4s1
35.368	3.05936	1.00854	3.03347	0.00241761	0.106451	Ap5m1
24.107	-0.195519	0.981979	-0.199107	0.842179	0.990882	Ap5s1
13.0546	-2.99328	2.29541	-1.30403	0.192223	0.758274	Ap5z1
64.0003	-0.15632	0.574913	-0.271902	0.785697	0.986786	Apaf1
105.278	-0.533891	0.482071	-1.10749	0.268081	0.833103	Apba1
193.881	-0.400209	0.314386	-1.27298	0.203024	0.765049	Apba2
5.87965	0.650889	3.23377	0.201279	0.840481		Apba3
333.532	0.130964	0.31482	0.415997	0.677412	0.975756	Apbb1
11.1301	-2.62191	1.88014	-1.39453	0.163157	0.722975	Apbb1ip
189.081	0.579614	0.385805	1.50235	0.133006	0.682777	Apbb2
48.0008	1.2252	0.660633	1.85459	0.0636548	0.538118	Apbb3
954.313	-0.201826	0.186164	-1.08413	0.278307	0.843377	Apc
40.0836	-0.198362	0.874881	-0.22673	0.820634	0.990038	Apc2
22.351	-0.151444	0.965337	-0.156882	0.875338	0.992252	Apeh
120.618	-0.0252979	0.419483	-0.0603074	0.951911	0.998352	Apex1
24.6228	0.412618	0.932787	0.442349	0.658236	0.973984	Aph1a
56.7452	0.194297	0.54667	0.355419	0.722276	0.980448	Aph1b
13.7811	-1.359	1.71364	-0.793051	0.427748	0.921142	Aph1c
194.674	0.38487	0.319187	1.20578	0.227902	0.791766	Api5
95.649	0.0225156	0.433867	0.0518952	0.958612	0.998948	Apip
27.8801	-0.336065	2.77345	-0.121172	0.903554	0.994243	Apitd1
8.17073	-0.344397	2.26262	-0.152211	0.87902		Aplf
13.7448	-4.64184	1.86712	-2.48609	0.0129154	0.265964	Apln
1732.2	0.195639	0.148808	1.3147	0.188609	0.757019	Aplp1
688.15	0.120781	0.203422	0.593745	0.552683	0.953638	Aplp2
46.2768	-0.487819	0.64744	-0.753459	0.451174	0.927955	Apmap
187.19	0.874076	0.355302	2.46009	0.0138901	0.277073	Apoa1bp
11.9747	0.0619042	1.70538	0.0362993	0.971044	0.998948	Apoc1
635.227	0.0308243	0.24661	0.124992	0.90053	0.994243	Apod
5262.67	0.0618152	0.116759	0.529426	0.59651	0.962612	Apoe
6.24059	-5.95061	3.59509	-1.6552	0.0978831		Apol7d
11.8982	0.386762	1.95012	0.198327	0.842789	0.990882	Apold1
47.9972	0.347735	0.6785	0.512506	0.608297	0.963031	Apoo
25.4511	0.885006	0.883203	1.00204	0.316324	0.864671	Apool
109.416	0.224174	0.45275	0.495139	0.620502	0.965055	Apopt1
2662.95	-0.325755	0.132845	-2.45214	0.0142011	0.28115	App
177.282	-0.0918167	0.361237	-0.254173	0.799362	0.987174	Appbp2
544.503	0.240059	0.197683	1.21436	0.224609	0.788263	Appl1
45.2984	0.874907	0.869599	1.0061	0.314366	0.862865	Appl2
217.039	0.292502	0.352646	0.829448	0.406851	0.912898	Aprt
65.5591	0.779561	0.5468	1.42568	0.153961	0.711163	Aptx
50.0714	1.15013	0.825028	1.39405	0.163302	0.722975	Aqp11
454.925	0.149739	0.252535	0.592941	0.55322	0.953638	Aqp4
130.895	0.614745	0.364349	1.68724	0.0915563	0.611199	Aqr
156.685	0.246402	0.347682	0.708701	0.47851	0.937909	Ar
226.026	0.324562	0.315772	1.02784	0.304027	0.858409	Araf
369.944	0.0672076	0.245386	0.273886	0.784172	0.986311	Arap2
104.173	0.330959	0.495357	0.668122	0.504056	0.941676	Arc
256.064	0.722595	0.31998	2.25825	0.0239299	0.364573	Arcn1
110.46	-0.270719	0.41629	-0.650313	0.51549	0.946119	Arel1
463.821	-0.056674	0.250616	-0.226138	0.821094	0.990038	Arf1
64.758	0.229862	0.583411	0.393996	0.693584	0.978733	Arf2
562.211	-0.639979	0.300847	-2.12726	0.0333988	0.410623	Arf3
265.547	0.186878	0.35008	0.533815	0.59347	0.962097	Arf4
380.103	0.499204	0.228798	2.18186	0.0291199	0.391537	Arf5
120.702	0.0504149	0.381069	0.132299	0.894748	0.994243	Arf6
32.7082	0.7901	0.913992	0.86445	0.387341	0.899355	Arfgap1
16.8692	1.10984	1.27044	0.873581	0.382346	0.896944	Arfgap2
15.7031	-3.66288	1.5778	-2.32151	0.0202593	0.335166	Arfgap3
260.41	0.166872	0.300835	0.554698	0.579101	0.957545	Arfgef1
89.1346	0.354412	0.429492	0.825189	0.409264	0.914242	Arfgef2
135.957	0.408392	0.437847	0.932728	0.35096	0.881542	Arfgef3
150.974	0.317126	0.404226	0.784525	0.432732	0.923608	Arfip1
96.8593	-0.165565	0.425375	-0.389221	0.697113	0.97891	Arfip2
47.0822	-0.0650585	0.617637	-0.105335	0.91611	0.995238	Arfrp1
7.2908	0.368798	2.93866	0.125499	0.900129		Arg2
695.958	-0.85406	0.251955	-3.38973	0.000699622	0.0456631	Arglu1
50.6239	0.058542	0.616878	0.0949004	0.924394	0.995886	Arhgap1
41.0981	-0.604697	0.775039	-0.780214	0.435265	0.92384	Arhgap10
120.863	-0.907503	0.450878	-2.01275	0.0441411	0.464198	Arhgap12
72.0875	-0.171177	0.593067	-0.28863	0.772864	0.986234	Arhgap15
6.77942	0.394194	2.66788	0.147756	0.882535		Arhgap17
25.9448	1.21255	0.922383	1.31458	0.188651	0.757019	Arhgap18
480.24	-0.0187167	0.219569	-0.0852429	0.932068	0.996314	Arhgap20
203.424	0.385065	0.366761	1.04991	0.293761	0.851172	Arhgap21
23.4965	-0.40562	1.22507	-0.3311	0.740569	0.982722	Arhgap23
5.39487	4.54292	3.11758	1.45719	0.145063		Arhgap24
231.902	0.00681725	0.368787	0.0184856	0.985251	0.998948	Arhgap26
5.92677	-1.50414	2.83478	-0.530601	0.595695		Arhgap27
68.8642	0.842287	0.501205	1.68052	0.0928554	0.612306	Arhgap29
16.3083	0.0246748	1.66914	0.0147829	0.988205	0.999246	Arhgap31
141.984	-0.288089	0.361934	-0.795971	0.426049	0.920942	Arhgap32
32.8176	0.390412	0.827045	0.472057	0.636886	0.971432	Arhgap33
307.396	-1.83477	0.279365	-6.56763	5.1122e-11	2.50266e-08	Arhgap35
74.8959	0.143798	0.542117	0.265252	0.790815	0.987174	Arhgap39
17.9894	-0.379778	1.10689	-0.343102	0.731522	0.981346	Arhgap42
321.435	0.136568	0.292109	0.467525	0.640124	0.97187	Arhgap44
984.566	0.346005	0.156623	2.20916	0.0271639	0.380453	Arhgap5
37.7265	0.849386	0.739745	1.14821	0.25088	0.814944	Arhgap6
166.653	0.274802	0.330659	0.831074	0.405932	0.91186	Arhgdia
39.6395	0.0669638	0.966036	0.0693181	0.944736	0.997093	Arhgdib
339.355	-0.239405	0.329565	-0.726428	0.467577	0.933078	Arhgdig
10.47	0.666139	1.72775	0.385553	0.699828	0.97891	Arhgef1
47.0803	0.111622	0.835729	0.133562	0.893749	0.994243	Arhgef10
8.9049	1.6155	1.7637	0.915967	0.359684		Arhgef10l
14.3019	-0.753643	1.34618	-0.559837	0.575591	0.956653	Arhgef11
287.308	-0.0718928	0.310529	-0.231517	0.816913	0.989669	Arhgef12
8.1059	-0.510865	2.79171	-0.182993	0.854803		Arhgef15
26.5898	-0.70778	0.976748	-0.724629	0.46868	0.933994	Arhgef17
34.5669	-0.836618	0.754576	-1.10873	0.267548	0.833103	Arhgef18
72.4309	1.04387	0.55446	1.88268	0.0597433	0.52707	Arhgef2
37.7506	-0.729901	0.685397	-1.06493	0.286906	0.850401	Arhgef25
98.6219	1.09985	0.443891	2.47774	0.0132218	0.269694	Arhgef26
142.302	0.191751	0.362809	0.528516	0.597141	0.962612	Arhgef28
84.7422	0.0894321	0.585113	0.152846	0.87852	0.992437	Arhgef3
150.085	-0.0632777	0.374494	-0.168968	0.865821	0.992252	Arhgef4
29.5429	0.547767	0.811196	0.675259	0.499511	0.941676	Arhgef40
30.2211	0.29133	0.911296	0.319688	0.749205	0.982938	Arhgef6
113.559	-0.599749	0.477993	-1.25472	0.20958	0.775299	Arhgef7
491.517	-0.334548	0.20514	-1.63083	0.102927	0.630245	Arhgef9
165.792	0.599797	0.352434	1.70187	0.0887795	0.604801	Arid1a
261.83	-1.43521	0.281761	-5.09372	3.51104e-07	8.04552e-05	Arid1b
74.5275	0.730585	0.55689	1.3119	0.189553	0.757694	Arid2
331.473	0.32021	0.262728	1.21879	0.222924	0.787879	Arid4a
414.227	-0.154806	0.286884	-0.539612	0.589464	0.960298	Arid4b
101.676	0.175779	0.437565	0.40172	0.68789	0.977867	Arid5b
155.403	-0.307627	0.402134	-0.764987	0.444279	0.926485	Arih1
23.5943	0.333731	0.945417	0.352998	0.72409	0.980448	Arih2
43.0504	0.74349	0.781484	0.951383	0.34141	0.876935	Arl1
47.555	0.430135	0.646728	0.665094	0.50599	0.941676	Arl13b
117.212	-0.791373	0.402568	-1.96581	0.0493204	0.485287	Arl14ep
66.694	-0.771577	0.563369	-1.36958	0.170819	0.736218	Arl15
145.999	-0.656718	0.403064	-1.62931	0.103246	0.630245	Arl16
167.984	0.229695	0.394557	0.582159	0.560459	0.95388	Arl2
76.6202	-0.119401	0.491357	-0.243002	0.808004	0.987174	Arl2bp
680.697	0.121326	0.230959	0.525314	0.599365	0.962925	Arl3
351.95	0.554302	0.259038	2.13984	0.0323674	0.40724	Arl4a
76.0705	-0.162972	0.474878	-0.343188	0.731457	0.981346	Arl4c
187.749	0.102799	0.326394	0.314953	0.752798	0.983375	Arl5a
40.7455	0.539368	0.657254	0.820638	0.411852	0.914859	Arl5b
86.3723	-0.433623	0.463248	-0.93605	0.349248	0.880275	Arl6
1928.42	0.405825	0.148305	2.73642	0.00621122	0.172668	Arl6ip1
226.506	-0.624645	0.406661	-1.53603	0.12453	0.669799	Arl6ip4
199.576	0.0300155	0.308626	0.0972555	0.922524	0.995886	Arl6ip5
36.5083	-1.1128	0.738582	-1.50667	0.131897	0.680981	Arl6ip6
218.871	0.912832	0.283387	3.22114	0.0012768	0.0713246	Arl8a
325.711	0.267589	0.25341	1.05595	0.290991	0.851172	Arl8b
303.524	0.0787981	0.241386	0.32644	0.744091	0.982887	Armc1
18.121	0.179941	1.41977	0.126739	0.899147	0.994243	Armc10
12.546	0.907637	1.46507	0.619519	0.535574	0.94852	Armc3
8.03503	6.64872	2.67173	2.48854	0.0128269		Armc4
13.6601	1.74916	1.96085	0.892038	0.372372	0.892068	Armc5
28.9232	-0.151904	0.950912	-0.159745	0.873082	0.992252	Armc6
102.166	0.395793	0.441017	0.897455	0.369476	0.890228	Armc8
19.6971	0.560684	1.08329	0.517574	0.604756	0.962925	Armc9
147.089	0.369728	0.349784	1.05702	0.290504	0.851172	Armcx1
104.48	0.385557	0.423199	0.911052	0.362268	0.886956	Armcx2
66.4485	-0.459009	0.53	-0.866055	0.38646	0.899355	Armcx3
55.389	1.1967	0.710608	1.68405	0.0921721	0.611199	Armcx4
141.847	0.663467	0.391153	1.69618	0.0898512	0.606586	Armcx5
10.4928	2.75515	1.94449	1.4169	0.156513	0.713169	Armcx6
19.8427	-0.594292	1.18887	-0.499878	0.617161	0.965055	Armt1
11.8978	-1.13855	1.54128	-0.738705	0.460086	0.931575	Arnt
100.094	0.63684	0.414296	1.53716	0.124254	0.669799	Arnt2
37.0788	-0.895713	0.81802	-1.09498	0.273527	0.83809	Arntl
406.327	-0.0150004	0.254256	-0.0589972	0.952954	0.998473	Arpc1a
1334.23	-0.163928	0.140429	-1.16733	0.243076	0.803291	Arpc2
81.5187	0.229519	0.506326	0.453302	0.650331	0.973963	Arpc3
74.875	-0.509419	0.489791	-1.04007	0.298305	0.854226	Arpc4
648.504	-0.441509	0.225261	-1.95999	0.0499975	0.487264	Arpc5
431.919	0.513064	0.254435	2.01648	0.0437493	0.46376	Arpc5l
11.9644	0.20563	1.7408	0.118124	0.905969	0.994243	Arpin
658.978	-0.308491	0.212686	-1.45045	0.146932	0.699432	Arpp19
969.851	-0.0347619	0.173307	-0.20058	0.841027	0.990882	Arpp21
37.3202	-0.647145	0.711824	-0.909136	0.363278	0.886956	Arrb1
65.7897	0.528543	0.578724	0.91329	0.36109	0.886267	Arrb2
84.7937	0.199982	0.528922	0.378093	0.705361	0.980448	Arrdc3
20.6111	0.539589	1.01015	0.534168	0.593225	0.962097	Arrdc4
20.5996	-1.04401	1.51536	-0.688952	0.490854	0.941676	Arsa
89.7332	-0.782143	0.458509	-1.70584	0.0880378	0.601629	Arsb
28.1425	-1.29563	1.19299	-1.08604	0.277462	0.842951	Arsg
21.0728	2.29643	1.13678	2.02011	0.043372	0.460276	Arsj
38.6255	1.11408	0.726359	1.53379	0.125081	0.670208	Arsk
9.00291	0.958923	1.96159	0.48885	0.624948		Art3
4.45398	-3.86329	3.86127	-1.00052	0.317057		Arv1
22.8732	0.203592	1.37744	0.147804	0.882497	0.993138	Arvcf
38.332	1.00263	0.802598	1.24924	0.211579	0.777033	Arx
67.6117	-0.208991	0.519871	-0.402006	0.68768	0.977867	Arxes1
137.096	-0.0577288	0.3536	-0.16326	0.870314	0.992252	Arxes2
11.5986	0.570416	1.99116	0.286473	0.774516	0.986234	As3mt
109.146	-0.200684	0.52984	-0.378763	0.704864	0.980448	Asah1
6.63584	0.432375	2.56556	0.168531	0.866166		Asah2
223.607	0.406429	0.42119	0.964954	0.334568	0.872669	Asap1
128.228	-0.0216834	0.444901	-0.0487375	0.961128	0.998948	Asap2
28.4647	0.453425	0.94472	0.479957	0.631258	0.968734	Asb1
15.7497	0.501063	1.40235	0.357301	0.720866	0.980448	Asb11
38.8358	-0.0113752	0.687206	-0.0165529	0.986793	0.998948	Asb13
43.5506	-0.64668	0.748703	-0.863734	0.387734	0.899355	Asb3
5.86604	1.26528	2.25707	0.560583	0.575082		Asb6
82.0874	-0.268915	0.449289	-0.598536	0.549482	0.953253	Asb7
50.4612	-0.583422	0.80198	-0.727477	0.466934	0.933078	Asb8
52.5255	0.367081	0.997399	0.368039	0.712844	0.980448	Ascc1
119.142	0.225795	0.508516	0.444027	0.657023	0.973984	Ascc3
15.3811	-0.993728	1.84304	-0.539178	0.589764	0.960393	Ascl1
10.3012	-0.682638	1.62026	-0.421314	0.673526	0.974626	Ascl4
78.5212	0.277379	0.487132	0.569413	0.569076	0.955111	Asf1a
6.20036	-0.496963	3.16084	-0.157225	0.875068		Asgr1
690.235	0.117684	0.276363	0.425831	0.670231	0.974626	Ash1l
78.2641	-0.551421	0.553319	-0.996568	0.318974	0.866157	Ash2l
10.6678	-0.185865	2.05853	-0.0902901	0.928057	0.996314	Asic1
35.3455	-1.34434	0.762722	-1.76256	0.0779743	0.57768	Asic2
18.8192	-1.44842	1.11834	-1.29515	0.195268	0.759897	Asl
347.003	0.922104	0.227467	4.0538	5.03925e-05	0.00583577	Asna1
247.278	-0.577317	0.270692	-2.13274	0.0329459	0.409259	Asns
67.5799	0.0301036	0.562155	0.0535503	0.957293	0.998948	Asnsd1
74.7132	0.616765	0.473533	1.30248	0.192753	0.758274	Aspa
6.28179	-5.95937	2.93482	-2.03057	0.0422984		Aspg
200.788	-0.246157	0.313201	-0.785939	0.431904	0.923486	Asph
23.5046	1.95461	1.22034	1.60169	0.109223	0.643156	Asphd1
105.373	0.138681	0.394265	0.351745	0.725029	0.980448	Asphd2
8.95625	-0.26634	1.96283	-0.135692	0.892065		Aspn
47.361	0.934389	0.688262	1.35761	0.174588	0.740574	Aspscr1
118.536	-0.689519	0.423236	-1.62916	0.103279	0.630245	Asrgl1
8.0328	-4.84359	2.42932	-1.9938	0.0461737		Aste1
186.185	0.020568	0.439127	0.0468385	0.962642	0.998948	Astn1
5.73178	-1.12371	2.70571	-0.41531	0.677915		Astn2
29.5847	1.06925	0.899281	1.189	0.234439	0.799515	Asun
20.4197	-1.51058	1.05723	-1.42881	0.15306	0.709359	Asxl1
67.1634	-0.011498	0.549988	-0.0209058	0.983321	0.998948	Asxl2
27.8255	0.516032	0.902822	0.571577	0.567609	0.954598	Asxl3
161.309	0.611285	0.430167	1.42104	0.155304	0.71293	Atad1
19.6058	-1.10733	1.36563	-0.810858	0.417447	0.917469	Atad2
98.4881	0.747391	0.435516	1.71611	0.0861427	0.598488	Atad2b
69.6693	-0.250248	0.521246	-0.480096	0.631159	0.968734	Atad3a
14.9211	-1.27433	1.2567	-1.01403	0.310567	0.861449	Atad3aos
33.6841	-0.279619	0.932672	-0.299805	0.764326	0.985692	Atad5
17.6754	-1.47286	1.38133	-1.06626	0.286307	0.849962	Atat1
77.3558	-0.82936	0.579119	-1.43211	0.152113	0.70855	Atcay
582.198	0.265401	0.212544	1.24869	0.211779	0.777033	Ate1
27.9063	-1.8535	1.06927	-1.73343	0.0830194	0.591326	Atf1
291.454	0.0121645	0.264042	0.0460705	0.963254	0.998948	Atf2
133.54	-0.0888891	0.407066	-0.218365	0.827145	0.990038	Atf4
177.935	0.0118456	0.332906	0.0355824	0.971615	0.998948	Atf6
26.4389	0.794184	1.14094	0.696078	0.48638	0.939657	Atf6b
52.2127	-0.352377	0.580333	-0.607199	0.543719	0.950549	Atf7
69.8813	0.148327	0.661136	0.224351	0.822484	0.990038	Atf7ip
71.0557	-0.420291	0.715977	-0.587017	0.557192	0.95388	Atg10
55.936	0.0834896	0.687884	0.121372	0.903397	0.994243	Atg101
128.019	-0.230515	0.459886	-0.501245	0.616199	0.965055	Atg12
47.9638	-0.890955	0.746169	-1.19404	0.232463	0.797293	Atg13
34.1584	-0.587505	0.848751	-0.692199	0.488812	0.941099	Atg14
51.2006	0.0997005	0.825093	0.120835	0.903821	0.994243	Atg16l1
15.7648	0.974119	1.27759	0.762467	0.445781	0.926485	Atg2a
83.143	-0.677097	0.57784	-1.17177	0.241289	0.801737	Atg2b
161.186	0.391104	0.385229	1.01525	0.309986	0.861449	Atg3
34.6581	0.686037	0.761608	0.900775	0.367708	0.888937	Atg4b
72.6764	-0.444567	0.555018	-0.800995	0.423135	0.919363	Atg4c
187.588	0.432683	0.40704	1.063	0.287783	0.850401	Atg5
31.0695	0.642863	1.18816	0.541056	0.588469	0.959947	Atg7
37.6997	-0.662091	0.752945	-0.879336	0.379219	0.896481	Atg9a
79.9279	0.0709703	0.570707	0.124355	0.901034	0.994243	Atic
381.889	-0.0500414	0.240692	-0.207906	0.835302	0.990873	Atl1
78.804	0.284293	0.632663	0.44936	0.653172	0.973963	Atl2
13.5322	1.5747	1.78379	0.882783	0.377353	0.896257	Atl3
63.4193	-0.189453	0.541226	-0.350045	0.726305	0.980448	Atm
140.87	0.202508	0.362954	0.557944	0.576883	0.95712	Atmin
26.2932	1.39433	0.983372	1.4179	0.156219	0.713169	Atn1
544.33	0.0870211	0.237225	0.36683	0.713746	0.980448	Atox1
5.46362	0.939877	3.35364	0.280256	0.779281		Atp10a
7.48209	6.54719	2.68465	2.43875	0.0147382		Atp10d
28.4327	0.175076	0.817072	0.214273	0.830334	0.990516	Atp11a
72.6662	0.227223	0.533352	0.426027	0.670088	0.974626	Atp11b
42.6148	-0.328883	0.633747	-0.51895	0.603796	0.962925	Atp11c
21.2417	-0.567473	1.12451	-0.504639	0.613813	0.96498	Atp13a1
118.655	0.281184	0.410574	0.684854	0.493436	0.941676	Atp13a2
90.4916	-0.445074	0.446319	-0.997211	0.318662	0.866157	Atp13a3
11.3178	1.26245	2.159	0.584739	0.558724	0.95388	Atp13a4
17.9767	-1.03737	1.14634	-0.904941	0.365497	0.887416	Atp13a5
326.217	-0.226844	0.277093	-0.818656	0.412983	0.914884	Atp1a1
971.156	-0.000210527	0.266743	-0.000789252	0.99937	0.999692	Atp1a2
322.933	-0.0187289	0.239432	-0.0782225	0.937651	0.997093	Atp1a3
6483.79	0.0284628	0.0993584	0.286466	0.774521	0.986234	Atp1b1
228.697	-0.158676	0.316218	-0.501794	0.615812	0.965055	Atp1b2
198.663	0.238394	0.401642	0.593549	0.552814	0.953638	Atp1b3
1267.33	0.0009482	0.162058	0.00585098	0.995332	0.999692	Atp2a2
3868.9	-0.542324	0.110894	-4.89049	1.00584e-06	0.00019005	Atp2b1
572.481	0.12728	0.203763	0.62465	0.532201	0.948218	Atp2b2
189.363	-0.476332	0.317593	-1.49982	0.133661	0.683863	Atp2b3
153.561	0.0332019	0.369658	0.0898177	0.928432	0.996314	Atp2b4
304.102	-0.0603131	0.240869	-0.250398	0.802279	0.987174	Atp2c1
955.761	0.0944909	0.187874	0.502949	0.615	0.965055	Atp5a1
1481.2	-0.0580336	0.136431	-0.425368	0.670568	0.974626	Atp5b
1191.9	-0.0616226	0.167798	-0.367244	0.713437	0.980448	Atp5c1
483.554	0.231075	0.20917	1.10472	0.269279	0.833103	Atp5d
1019.94	0.285241	0.17352	1.64385	0.100207	0.6278	Atp5e
1603.58	0.0815172	0.14742	0.552958	0.580292	0.957776	Atp5f1
970.812	-0.0192118	0.178121	-0.107858	0.914108	0.994857	Atp5g1
13.4472	-0.260748	1.33874	-0.194771	0.845572	0.991119	Atp5g2
985.975	0.53077	0.15196	3.49282	0.000477947	0.0347803	Atp5g3
2006.63	0.291992	0.151249	1.93054	0.0535395	0.502174	Atp5h
1675.9	0.0243982	0.134937	0.180812	0.856515	0.991937	Atp5j
2606.73	0.527392	0.138236	3.81516	0.000136092	0.0135714	Atp5j2
2511.44	0.273177	0.149872	1.82274	0.0683434	0.548657	Atp5k
1064.31	0.318561	0.162643	1.95865	0.0501534	0.487502	Atp5l
3480.35	0.241304	0.135298	1.7835	0.0745057	0.564244	Atp5o
85.1428	-0.796918	0.577523	-1.37989	0.16762	0.732065	Atp5s
25.2861	1.57873	1.18329	1.33418	0.182144	0.750669	Atp5sl
149.152	0.612686	0.347846	1.76137	0.0781754	0.57768	Atp6ap1
539.189	0.129901	0.218086	0.595642	0.551414	0.953638	Atp6ap2
299.943	0.085097	0.243108	0.350037	0.726311	0.980448	Atp6v0a1
49.1989	1.10412	0.807631	1.36711	0.171591	0.736291	Atp6v0a2
1342.17	0.149304	0.159528	0.93591	0.349319	0.880275	Atp6v0b
380.136	-0.484816	0.273685	-1.77144	0.0764879	0.570604	Atp6v0d1
262.452	-0.0475422	0.411961	-0.115405	0.908124	0.994243	Atp6v0e
226.758	0.811086	0.277626	2.92151	0.00348339	0.128123	Atp6v0e2
1479.51	-0.0246867	0.145763	-0.169362	0.865512	0.992252	Atp6v1a
931.631	0.12823	0.205403	0.624284	0.532441	0.948218	Atp6v1b2
795.763	-0.0333908	0.20408	-0.163617	0.870033	0.992252	Atp6v1c1
1804.56	0.157835	0.153593	1.02762	0.30413	0.858409	Atp6v1d
1476.68	0.280587	0.15563	1.80291	0.0714016	0.557751	Atp6v1e1
1448.6	0.24738	0.210806	1.1735	0.240596	0.801737	Atp6v1f
703.956	0.174291	0.230811	0.755126	0.450173	0.927955	Atp6v1g1
454.138	-0.625385	0.273016	-2.29065	0.0219835	0.346651	Atp6v1g2
415.558	0.107948	0.229257	0.470861	0.63774	0.971432	Atp6v1h
17.8037	0.0479389	1.16769	0.0410545	0.967252	0.998948	Atp7a
759.955	-0.204289	0.220327	-0.927206	0.35382	0.881925	Atp8a1
41.9232	0.25096	3.10558	0.0808093	0.935594	0.996823	Atp8a2
10.0345	2.03822	1.64494	1.23908	0.215315	0.780615	Atp8b2
315.298	0.318481	0.242949	1.3109	0.189893	0.757694	Atp9a
92.5783	-0.4395	0.423593	-1.03755	0.299478	0.85503	Atp9b
34.3828	0.796418	0.718649	1.10821	0.267769	0.833103	Atpaf1
29.6173	-0.419387	0.921971	-0.454881	0.649195	0.973963	Atpaf2
2135.71	0.333975	0.131271	2.54416	0.010954	0.245269	Atpif1
9.6846	1.0688	2.07472	0.515154	0.606446	0.962925	Atr
249.609	-0.126692	0.298149	-0.424929	0.670889	0.974626	Atraid
114.785	0.341668	0.402955	0.847904	0.396491	0.903159	Atrip
163.466	0.313043	0.350878	0.892171	0.372301	0.892068	Atrn
66.9207	-0.20097	0.664951	-0.302232	0.762475	0.985344	Atrnl1
1100.49	-0.397833	0.204078	-1.94942	0.0512457	0.491904	Atrx
436.108	-0.486889	0.314285	-1.54919	0.121335	0.663004	Atxn1
770.066	0.265256	0.196872	1.34735	0.177867	0.744535	Atxn10
13.2674	-0.329628	1.50388	-0.219185	0.826506	0.990038	Atxn1l
184.381	-0.113069	0.302955	-0.37322	0.708985	0.980448	Atxn2
48.2679	0.40371	0.806566	0.50053	0.616702	0.965055	Atxn2l
53.9504	1.54804	0.786422	1.96845	0.0490157	0.483424	Atxn3
47.7954	0.046037	0.700651	0.065706	0.947612	0.99812	Atxn7
23.4925	0.770615	1.09745	0.70219	0.482561	0.938288	Atxn7l1
108.703	-0.104624	0.474815	-0.220346	0.825601	0.990038	Atxn7l3
957.861	-0.470027	0.181769	-2.58585	0.00971398	0.225597	Atxn7l3b
51.2445	0.00635816	0.775366	0.0082002	0.993457	0.999692	AU019823
40.4493	-1.72715	0.891647	-1.93703	0.052742	0.499149	AU022252
49.7138	0.670512	0.609693	1.09975	0.271439	0.835684	AU040320
72.9972	0.868082	0.527439	1.64584	0.099796	0.627144	AU041133
116.167	0.0918989	0.462989	0.198491	0.842661	0.990882	Auh
49.8351	-0.759492	0.924862	-0.821195	0.411535	0.914859	Aup1
446.03	0.898718	0.240007	3.74454	0.000180722	0.0164999	Aurkaip1
85.3516	-0.00597825	0.458627	-0.0130351	0.9896	0.999664	Auts2
5.21656	-0.625499	3.0369	-0.205966	0.836817		AV039307
19.3215	2.26874	1.13702	1.99534	0.0460054	0.47054	Aven
79.6921	0.80087	0.624199	1.28304	0.199479	0.765049	Avl9
174.125	-0.0491448	0.312525	-0.157251	0.875047	0.992252	Avpi1
5.49698	1.94751	3.34343	0.582489	0.560237		AW112010
8.23629	1.24952	1.86022	0.671703	0.501773		AW146154
57.2353	-0.512374	0.665027	-0.770457	0.441029	0.926485	AW209491
21.773	0.64795	1.106	0.585848	0.557977	0.95388	AW495222
5.22538	-5.69279	3.94434	-1.44328	0.148942		AW549542
210.4	0.188099	0.363543	0.517406	0.604873	0.962925	AW549877
25.2768	1.82453	1.00623	1.81323	0.0697961	0.553538	AW551984
41.5047	1.6571	0.765133	2.16577	0.0303291	0.397862	AW554918
10.262	0.742587	1.82305	0.407333	0.683764	0.977081	Axin1
46.426	1.60799	0.742809	2.16474	0.0304073	0.398403	Axin2
22.8866	0.698775	1.13634	0.614933	0.538599	0.948914	Axl
198.435	0.268387	0.336743	0.797007	0.425447	0.920511	Azi2
255.796	0.162693	0.269535	0.603607	0.546105	0.951341	Azin1
22.0632	1.64233	1.08935	1.50763	0.13165	0.680247	Azin2
9.53652	0.678349	1.67884	0.404058	0.68617	0.977475	B130034C11Rik
9.82088	-0.172528	2.12322	-0.0812575	0.935237	0.996823	B230110G15Rik
181.092	0.683574	0.342342	1.99676	0.0458517	0.47054	B230118H07Rik
203.234	-0.645038	0.358931	-1.79711	0.072318	0.56033	B230209E15Rik
8.94061	-2.25043	2.19053	-1.02734	0.304258		B230216N24Rik
150.52	0.581875	0.38114	1.52667	0.126842	0.675252	B230217C12Rik
16.1263	-1.29158	1.57092	-0.82218	0.410975	0.914458	B230217O12Rik
588.483	-0.142058	0.194793	-0.729277	0.465832	0.932306	B230219D22Rik
36.5434	0.934272	0.717554	1.30202	0.192908	0.758294	B230307C23Rik
61.6053	-0.53612	0.538252	-0.996038	0.319232	0.866244	B230354K17Rik
307.694	0.117455	0.277012	0.424009	0.671559	0.974626	B2m
75.0559	0.597383	0.757513	0.788611	0.430339	0.922706	B3galnt1
11.5019	-1.13026	1.88711	-0.598939	0.549213	0.953149	B3galnt2
196.907	0.150839	0.300235	0.502402	0.615385	0.965055	B3galt1
335.782	-0.0553863	0.250609	-0.221007	0.825087	0.990038	B3galt2
90.4924	0.273724	0.430046	0.6365	0.52445	0.947696	B3galt5
16.3422	0.345226	1.40026	0.246545	0.805261	0.987174	B3galt6
121.97	0.30576	0.431976	0.707817	0.479059	0.937909	B3gat1
24.1055	0.600227	1.09559	0.547858	0.58379	0.958113	B3gat2
90.977	-1.06037	0.546681	-1.93965	0.0524218	0.497866	B3gat3
58.2125	0.305742	0.555071	0.550817	0.581759	0.957776	B3glct
107.14	-0.124137	0.46037	-0.269646	0.787432	0.986864	B3gnt2
6.07946	1.02022	2.43601	0.418807	0.675357		B3gnt9
6.51557	0.073694	3.08605	0.0238797	0.980949		B430319G15Rik
31.4865	-0.400043	0.91773	-0.435905	0.662906	0.973984	B4galnt1
16.6051	0.313208	1.16641	0.268524	0.788296	0.987174	B4galnt4
33.7947	-1.38036	0.784338	-1.7599	0.0784241	0.57768	B4galt1
36.4397	0.580529	0.845087	0.686946	0.492116	0.941676	B4galt2
15.1683	-2.7968	1.34272	-2.08293	0.0372572	0.433137	B4galt3
36.6139	0.203216	0.754177	0.269454	0.787581	0.986864	B4galt4
19.1549	2.84744	1.2238	2.32673	0.0199799	0.33366	B4galt5
187.285	-0.362635	0.302153	-1.20017	0.230072	0.795211	B4galt6
50.6245	0.145827	0.69219	0.210674	0.833142	0.990612	B4gat1
58.4816	1.28988	0.745673	1.72982	0.0836624	0.592414	B630005N14Rik
74.1937	0.0669591	0.527373	0.126967	0.898966	0.994243	B630019K06Rik
9.36434	-0.281662	1.83083	-0.153844	0.877732	0.992271	B830017H08Rik
17.1232	0.950673	1.6496	0.576304	0.56441	0.954061	B930041F14Rik
62.4791	-0.335826	0.624367	-0.537866	0.59067	0.960774	B9d1
58.7103	-0.197525	0.706722	-0.279495	0.779865	0.986311	B9d2
262.749	0.212307	0.307028	0.691493	0.489256	0.941288	Baalc
134.037	-0.138693	0.373179	-0.371652	0.710152	0.980448	Babam1
119.473	-0.421661	0.401479	-1.05027	0.293595	0.851172	Bace1
6.79086	-2.26901	3.02597	-0.749845	0.453348		Bace2
31.0621	0.701516	0.816301	0.859384	0.390129	0.900683	Bach1
21.3411	-1.32878	1.14812	-1.15735	0.24713	0.810224	Bach2
80.943	-0.228801	0.512809	-0.446171	0.655474	0.973984	Bad
475.84	-0.0779579	0.256551	-0.303869	0.761228	0.984551	Bag1
16.1447	-0.117701	1.72799	-0.0681144	0.945695	0.997502	Bag2
7.06551	2.76933	2.95008	0.93873	0.347869		Bag3
309.427	-0.975546	0.25943	-3.76034	0.000169682	0.0162201	Bag4
120.868	0.0901244	0.548049	0.164446	0.86938	0.992252	Bag5
115.001	-0.30136	0.419357	-0.718623	0.472373	0.936787	Bag6
31.5121	0.31522	0.865481	0.364213	0.715699	0.980448	Bahd1
263.258	-0.661524	0.287231	-2.3031	0.021273	0.340937	Baiap2
5.06441	0.0431195	3.50002	0.0123198	0.99017		Baiap3
25.89	-0.95728	0.878416	-1.08978	0.27581	0.839591	Bambi
302.337	0.00767128	0.295888	0.0259263	0.979316	0.998948	Banf1
76.6085	-0.27118	0.497277	-0.54533	0.585527	0.958814	Banp
58.4882	0.217554	0.867585	0.250758	0.802002	0.987174	Bap1
6.05124	6.2413	2.99982	2.08056	0.0374743		Bard1
1382.43	-0.464068	0.469551	-0.988323	0.322994	0.867757	Basp1
7.11441	6.47502	2.75075	2.35391	0.0185772		Batf3
37.4499	0.393243	0.809667	0.485685	0.62719	0.966496	Bax
214.729	0.0882209	0.394324	0.223727	0.82297	0.990038	Baz1b
58.2213	-0.679611	0.69473	-0.978237	0.327957	0.870491	Baz2a
101.478	0.502609	0.467417	1.07529	0.282244	0.847423	Baz2b
8.73273	1.31447	2.21151	0.594376	0.55226		Bbc3
386.702	-0.357065	0.238937	-1.49439	0.135073	0.685467	Bbip1
9.64505	0.033653	1.63387	0.0205971	0.983567	0.998948	Bbs1
21.7004	-1.12258	1.23619	-0.908092	0.36383	0.886956	Bbs10
13.6743	-2.07497	1.52835	-1.35765	0.174573	0.740574	Bbs12
17.0487	1.52562	1.31269	1.16221	0.245152	0.807163	Bbs2
211.718	0.470081	0.378417	1.24223	0.214152	0.780259	Bbs4
12.3268	0.062739	1.51954	0.0412881	0.967066	0.998948	Bbs5
30.9501	-0.946114	1.20479	-0.785295	0.43228	0.923608	Bbs7
16.9231	1.16711	1.62341	0.718924	0.472188	0.936787	Bbs9
129.245	-0.709912	0.381293	-1.86185	0.0626239	0.533516	Bbx
58.7792	0.449972	0.590194	0.762414	0.445813	0.926485	BC002163
333.451	-0.0195455	0.276767	-0.0706207	0.9437	0.997093	BC003331
139.023	0.253449	0.347763	0.728799	0.466125	0.932306	BC003965
182.317	0.505542	0.331237	1.52622	0.126954	0.675252	BC004004
107.361	0.156273	0.443783	0.352139	0.724734	0.980448	BC005537
138.857	0.179738	0.354556	0.506939	0.612198	0.964507	BC005561
184.068	-0.692719	0.419738	-1.65036	0.0988694	0.623431	BC005624
5.64296	1.42039	2.8405	0.50005	0.61704		BC017158
8.70568	-1.99225	2.14146	-0.930324	0.352203		BC017643
4.67346	-3.00587	3.677	-0.817478	0.413655		BC021891
12.1379	0.378556	1.42409	0.265824	0.790375	0.987174	BC022687
16.5421	0.987977	1.22501	0.806505	0.419951	0.918857	BC023829
5.23555	-4.20371	3.18143	-1.32133	0.186392		BC024978
6.69132	-1.32833	2.61604	-0.507761	0.611621		BC028528
31.5002	1.50906	0.797923	1.89124	0.0585926	0.52302	BC029214
122.315	0.23897	0.445921	0.535902	0.592026	0.961915	BC029722
207.442	0.0680372	0.325366	0.20911	0.834363	0.990873	BC030336
57.1579	-0.866541	0.579902	-1.49429	0.1351	0.685467	BC030500
6.75534	-6.06404	2.82299	-2.14809	0.0317068		BC030867
436.435	-0.509358	0.232109	-2.19448	0.0282009	0.385926	BC031181
12.5409	0.978361	1.5142	0.646124	0.518199	0.947257	BC037034
5.64142	-5.80315	3.26508	-1.77734	0.0755125		BC037704
13.0856	3.85956	1.76876	2.18207	0.0291045	0.391537	BC048403
83.6768	-0.92671	0.450312	-2.05793	0.0395972	0.44532	BC048546
5.13088	-0.292235	2.55562	-0.11435	0.90896		BC051226
11.9268	0.401597	1.58382	0.253562	0.799834	0.987174	BC052040
14.5102	2.87203	1.55206	1.85047	0.0642462	0.538314	BC064078
7.94631	1.0189	1.89515	0.537638	0.590827		BC065397
20.164	-1.63858	1.4332	-1.1433	0.252914	0.816535	BC068281
11.9593	-0.2882	1.48987	-0.193439	0.846615	0.991127	Bc1
98.0567	0.218103	0.488739	0.446257	0.655411	0.973984	Bcan
379.963	0.344701	0.252468	1.36533	0.17215	0.737155	Bcap29
257.502	0.163801	0.321949	0.508779	0.610907	0.963883	Bcap31
44.8866	0.969558	0.669868	1.44739	0.147789	0.700874	Bcar1
14.2422	1.21079	1.83447	0.660019	0.509242	0.944823	Bcar3
55.7615	0.278303	0.612094	0.454673	0.649344	0.973963	Bcas1
159.19	0.654844	0.339086	1.9312	0.0534579	0.502174	Bcas2
41.7678	0.531464	0.94146	0.56451	0.572407	0.955787	Bcas3
54.6791	-0.730632	0.621132	-1.17629	0.239479	0.801087	Bcat1
257.311	0.471024	0.290093	1.6237	0.10444	0.631212	Bccip
16.8211	-0.794914	1.66168	-0.478381	0.632379	0.969437	Bcdin3d
8.96973	-6.47293	2.45221	-2.63963	0.00829958		Bche
11.2714	2.06334	1.51361	1.36319	0.172823	0.737733	Bckdha
50.1218	-0.541244	0.733473	-0.737919	0.460563	0.931575	Bckdhb
70.8345	-0.748515	0.624019	-1.19951	0.230331	0.795715	Bckdk
33.3239	-1.23677	0.780159	-1.58528	0.112902	0.646036	Bcl10
216.191	-0.660726	0.370423	-1.78371	0.0744713	0.564244	Bcl11a
684.004	-0.132279	0.194223	-0.681069	0.495828	0.941676	Bcl11b
36.4365	-1.30062	0.791874	-1.64246	0.100495	0.6278	Bcl2
110.435	-0.151235	0.424823	-0.355995	0.721844	0.980448	Bcl2l1
6.91757	-0.220639	2.05605	-0.107312	0.914541		Bcl2l11
53.481	-1.02574	0.687291	-1.49244	0.135585	0.686246	Bcl2l13
53.6092	0.098781	0.677494	0.145803	0.884077	0.99318	Bcl2l2
37.0296	-0.115554	0.728888	-0.158535	0.874035	0.992252	Bcl6
136.082	-0.874699	0.370072	-2.36359	0.0180989	0.319121	Bcl7a
88.1394	-0.433976	0.516912	-0.839555	0.401158	0.907161	Bcl7b
21.0396	-0.145149	1.11261	-0.130457	0.896205	0.994243	Bcl7c
79.7614	-1.00238	0.464236	-2.15919	0.0308352	0.39971	Bcl9
12.8143	-1.0906	1.80432	-0.604438	0.545553	0.951341	Bcl9l
555.368	-0.172265	0.232105	-0.742188	0.457973	0.930285	Bclaf1
7.35286	-0.842091	2.3982	-0.351135	0.725487		Bco2
23.5118	-0.526646	0.972998	-0.541261	0.588328	0.959947	Bcor
9.72815	-0.101002	1.62884	-0.0620088	0.950556	0.998231	Bcorl1
45.5935	-0.979782	0.724028	-1.35324	0.17598	0.743022	Bcr
22.736	-0.428171	0.956162	-0.447802	0.654296	0.973984	Bcs1l
18.1482	0.898218	1.09101	0.823292	0.410342	0.914269	Bdh1
21.8377	-0.0363547	1.71799	-0.0211612	0.983117	0.998948	Bdh2
356.295	-0.441854	0.241652	-1.82848	0.067478	0.54601	Bdnf
185.553	-0.372056	0.302759	-1.22889	0.219115	0.784009	Bdp1
6.65949	-6.04388	2.8523	-2.11895	0.0340945		Bean1
127.567	1.20089	0.404585	2.96821	0.00299541	0.116886	Becn1
64.4963	0.731649	0.565075	1.29478	0.195396	0.759897	Begain
6.36404	1.40562	2.26996	0.619226	0.535767		Bend3
19.0566	-0.0447935	1.0688	-0.0419101	0.96657	0.998948	Bend4
42.0068	0.561076	0.82047	0.683847	0.494072	0.941676	Bend5
527.655	0.253191	0.248631	1.01834	0.308516	0.860548	Bend6
68.2849	-0.000929491	0.529502	-0.00175541	0.998599	0.999692	Bet1
305.134	-0.133544	0.320617	-0.416521	0.677029	0.975726	Bet1l
64.1726	-0.117861	0.568424	-0.207348	0.835738	0.990873	Bex1
889.009	-0.52836	0.171738	-3.07655	0.00209414	0.0986025	Bex2
48.5145	-0.0441941	0.629887	-0.0701619	0.944065	0.997093	Bex4
64.0653	-0.269904	0.553903	-0.487277	0.626062	0.966182	Bfar
14.5652	-0.251337	1.32832	-0.189214	0.849925	0.991897	Bfsp2
176.956	0.0415936	0.320125	0.129929	0.896623	0.994243	Bhlhb9
140.172	0.422016	0.354008	1.19211	0.233219	0.79792	Bhlhe22
92.1689	-0.767397	0.464944	-1.65052	0.0988376	0.623431	Bhlhe40
360.091	-0.488509	0.24982	-1.95544	0.0505311	0.488406	Bhlhe41
5.51213	1.20883	3.33633	0.362323	0.71711		Bicc1
231.645	0.150418	0.270711	0.555643	0.578455	0.957278	Bicd1
61.7725	-0.401006	0.574765	-0.697687	0.485373	0.939657	Bicd2
16.6593	-0.347728	1.24	-0.280425	0.779151	0.986234	Bid
273.796	-0.232982	0.367315	-0.634285	0.525895	0.947696	Bin1
11.3324	0.461074	1.46981	0.313696	0.753752	0.983375	Bin3
82.8973	-0.756459	0.453997	-1.66622	0.0956697	0.617231	Birc2
6.16521	6.26672	3.60858	1.73662	0.0824551		Birc5
915.391	-1.2289	0.201794	-6.08988	1.12994e-09	4.50721e-07	Birc6
37.0505	-0.818748	0.749179	-1.09286	0.274456	0.839263	Bivm
152.195	-0.157221	0.339599	-0.462961	0.643392	0.973905	Blcap
10.2375	0.471767	1.83364	0.257285	0.796959	0.987174	Blm
105.872	-0.0419205	0.450616	-0.0930292	0.92588	0.996314	Blmh
560.683	0.430762	0.211027	2.04126	0.0412249	0.452928	Bloc1s1
99.0965	0.0452695	0.548176	0.0825821	0.934184	0.996823	Bloc1s2
13.5722	1.0784	1.41931	0.759808	0.44737	0.926485	Bloc1s3
39.8781	-0.511926	0.893449	-0.572977	0.56666	0.954598	Bloc1s4
27.5579	0.020952	0.87821	0.0238577	0.980966	0.998948	Bloc1s5
66.3341	-0.0797598	0.512149	-0.155736	0.876241	0.992252	Bloc1s6
111.692	0.0675861	0.439856	0.153655	0.877882	0.992271	Blvra
39.8275	-0.90599	0.934565	-0.969424	0.332334	0.871006	Blvrb
96.3613	0.154468	0.437156	0.353349	0.723827	0.980448	Blzf1
114.868	0.169328	0.384597	0.440272	0.65974	0.973984	Bmi1
16.4391	0.50044	1.29878	0.385316	0.700003	0.97891	Bmp1
15.6549	0.0516041	1.70711	0.0302288	0.975885	0.998948	Bmp2
52.0709	0.067466	0.587883	0.114761	0.908635	0.994243	Bmp2k
4.57644	-5.50307	4.2311	-1.30062	0.193387		Bmp4
7.52364	-3.0504	2.07474	-1.47026	0.141493		Bmp7
7.00024	-1.01601	2.44915	-0.414841	0.678258		Bmper
95.5257	-0.202226	0.490216	-0.412524	0.679955	0.975798	Bmpr1a
60.2814	0.327732	0.69457	0.471849	0.637035	0.971432	Bmpr1b
706.99	-0.0408738	0.240427	-0.170005	0.865006	0.992252	Bmpr2
47.5629	0.216185	0.611147	0.353736	0.723537	0.980448	Bms1
189.783	-0.0305763	0.370124	-0.082611	0.934161	0.996823	Bmyc
30.355	-0.827037	1.34555	-0.614646	0.538789	0.948946	Bnip1
84.5328	0.0577948	0.537209	0.107583	0.914326	0.994857	Bnip2
249.607	-0.127728	0.27289	-0.468057	0.639744	0.97187	Bnip3
338.646	0.101303	0.233123	0.434547	0.663892	0.973984	Bnip3l
12.6719	-0.0122675	1.97497	-0.00621149	0.995044	0.999692	Boc
115.031	0.487225	0.427381	1.14002	0.254276	0.818659	Bod1
458.451	-0.0814224	0.206611	-0.394086	0.693518	0.978733	Bod1l
123.467	-0.32284	0.424098	-0.761239	0.446515	0.926485	Bok
234.95	0.0671204	0.386911	0.173478	0.862276	0.992252	Bola1
623.918	0.539144	0.232983	2.31409	0.0206628	0.339022	Bola2
250.626	0.572344	0.273942	2.08929	0.0366815	0.429357	Bola3
29.4795	0.269707	0.887902	0.303757	0.761313	0.984551	Bop1
68.8571	0.463578	0.536951	0.863353	0.387944	0.899355	Bpgm
51.1629	-0.120276	0.611767	-0.196605	0.844137	0.991099	Bphl
60.0439	-0.192737	0.614355	-0.313722	0.753732	0.983375	Bpnt1
326.529	-0.393831	0.265069	-1.48577	0.13734	0.687506	Bptf
726.508	-0.133366	0.207062	-0.644087	0.519519	0.947586	Braf
114.402	0.608258	0.439241	1.38479	0.166116	0.728984	Brap
24.8201	3.43373	1.22949	2.79281	0.00522518	0.157633	Brat1
18.3979	-0.35089	1.44184	-0.243362	0.807725	0.987174	Brca2
378.208	0.0394926	0.26286	0.150242	0.880574	0.992775	Brcc3
156.26	-0.0199164	0.415305	-0.0479561	0.961751	0.998948	Brd1
137.585	0.229336	0.404341	0.567184	0.570589	0.955175	Brd2
148.276	-0.706898	0.369438	-1.91344	0.0556916	0.512698	Brd3
178.153	-1.09112	0.444451	-2.45499	0.0140888	0.27944	Brd4
175.553	0.37827	0.315753	1.19799	0.23092	0.795986	Brd7
368.191	-0.400305	0.255122	-1.56908	0.11663	0.651943	Brd8
385.839	0.130294	0.244087	0.533802	0.593479	0.962097	Brd9
45.1101	0.993884	0.645143	1.54056	0.123423	0.667638	Brdt
93.7299	-0.0982777	0.529083	-0.185751	0.85264	0.991897	Bre
12.4111	1.04209	1.45019	0.718588	0.472395	0.936787	Brf1
8.23495	3.4866	2.20938	1.57809	0.114545		Brf2
38.7443	-0.178718	0.717057	-0.249238	0.803177	0.987174	Bri3
184.317	-0.670653	0.350708	-1.91228	0.0558398	0.512698	Bri3bp
222.191	0.010205	0.323753	0.031521	0.974854	0.998948	Brinp1
97.4907	0.382952	0.457014	0.837944	0.402062	0.908112	Brinp2
52.0358	-0.436359	0.619728	-0.704113	0.481362	0.937978	Brinp3
7.49793	-1.94134	2.34005	-0.829612	0.406758		Brip1os
208.563	0.682815	0.446844	1.52808	0.126491	0.674578	Brix1
265.026	0.219243	0.285101	0.769001	0.441893	0.926485	Brk1
36.6787	-0.993581	0.726757	-1.36714	0.17158	0.736291	Brms1
103.923	0.117121	0.438046	0.267372	0.789183	0.987174	Brms1l
70.446	-0.20054	0.588734	-0.340628	0.733383	0.981346	Brox
26.8724	-1.04872	0.938408	-1.11755	0.263757	0.829634	Brpf1
8.39856	2.68556	2.18984	1.22637	0.220058		Brpf3
85.1074	0.147823	0.510776	0.289409	0.772268	0.986234	Brsk1
153.878	-0.464223	0.35666	-1.30158	0.193059	0.758294	Brsk2
143.63	-0.653555	0.435173	-1.50183	0.133141	0.682777	Brwd1
39.8162	0.831115	0.854275	0.97289	0.330608	0.871006	Brwd3
154.173	0.00133114	0.410033	0.00324642	0.99741	0.999692	Bscl2
26.702	0.176652	0.872155	0.202546	0.83949	0.990882	Bsdc1
1063.12	0.452765	0.17315	2.61487	0.00892623	0.216522	Bsg
217.744	-0.844144	0.305006	-2.76763	0.00564655	0.163992	Bsn
110.553	0.376386	0.595139	0.632434	0.527103	0.948046	Btaf1
191.359	-0.078239	0.367482	-0.212905	0.831401	0.990612	Btbd1
68.5218	0.360014	0.694866	0.518105	0.604385	0.962925	Btbd10
23.0158	-1.02574	1.25489	-0.817395	0.413703	0.915083	Btbd11
4.80363	-5.57319	3.60611	-1.54549	0.122228		Btbd16
22.3698	-2.16541	1.35598	-1.59693	0.11028	0.643555	Btbd17
32.28	0.579311	0.848605	0.682663	0.49482	0.941676	Btbd2
760.974	-0.213961	0.163982	-1.30478	0.191967	0.758274	Btbd3
34.4672	0.538898	0.725341	0.742958	0.457507	0.929974	Btbd6
45.8597	0.134079	0.650419	0.206142	0.83668	0.990873	Btbd7
25.6917	0.388173	0.99357	0.390685	0.69603	0.97891	Btbd8
90.0672	-0.0677618	0.478923	-0.141488	0.887485	0.99399	Btbd9
171.95	-0.177705	0.358033	-0.496337	0.619657	0.965055	Btf3
69.3612	0.881806	0.632185	1.39485	0.16306	0.722975	Btf3l4
60.5311	0.120441	0.539935	0.223065	0.823485	0.990038	Btg1
27.3708	-1.0422	0.96423	-1.08087	0.279756	0.845282	Btg2
6.17212	-1.45556	2.20259	-0.660839	0.508715		Btg3
136.315	-0.770193	0.399165	-1.92951	0.0536678	0.502174	Btrc
165.677	-0.0967383	0.327748	-0.29516	0.767871	0.985692	Bub3
14.5196	1.09499	1.49305	0.733393	0.463319	0.931575	Bud13
150.635	-0.491496	0.351408	-1.39865	0.161919	0.722695	Bud31
20.3475	-1.8462	1.26177	-1.46318	0.143418	0.695457	Bysl
27.8059	0.745958	0.822947	0.906447	0.364699	0.887416	Bzrap1
536.698	0.314936	0.251206	1.2537	0.209951	0.775299	Bzw1
134.183	0.221874	0.375175	0.591387	0.554261	0.953638	Bzw2
7.2878	-1.10014	2.58921	-0.424892	0.670916		C030006K11Rik
26.4115	-0.304774	0.896789	-0.339851	0.733969	0.981346	C030018K13Rik
18.4799	-0.57827	1.12921	-0.512104	0.608578	0.963031	C030023E24Rik
53.132	1.05169	0.672861	1.56302	0.118048	0.656641	C030029H02Rik
5.14962	-1.13207	2.99758	-0.377662	0.705682		C030034I22Rik
12.2156	0.298551	1.58111	0.188823	0.850231	0.991897	C030037D09Rik
24.4592	-0.898221	0.90026	-0.997734	0.318408	0.866157	C030039L03Rik
33.6358	-0.308819	0.783656	-0.394074	0.693526	0.978733	C130030K03Rik
14.3859	0.518009	1.84049	0.281452	0.778364	0.986234	C130036L24Rik
5.00572	-0.519316	3.52204	-0.147447	0.882779		C130046K22Rik
43.1133	-0.896571	0.669194	-1.33978	0.180317	0.749149	C130071C03Rik
372.392	0.196215	0.233729	0.8395	0.401189	0.907161	C1d
17.8442	-0.787138	1.20358	-0.653995	0.513115	0.945665	C1galt1
112.479	0.321662	0.486	0.661857	0.508063	0.943909	C1galt1c1
127.292	-0.307951	0.452854	-0.680023	0.49649	0.941676	C1qa
250.462	0.39927	0.279687	1.42756	0.153419	0.710371	C1qb
147.411	0.265657	0.369596	0.718776	0.472279	0.936787	C1qbp
297.241	0.149549	0.309912	0.482552	0.629414	0.968083	C1qc
17.885	-0.628254	1.63239	-0.384867	0.700336	0.97891	C1ql1
38.9125	0.0397614	0.929648	0.0427703	0.965885	0.998948	C1ql2
383.551	-0.304639	0.234355	-1.2999	0.193634	0.758595	C1ql3
313.364	0.324817	0.261844	1.2405	0.214791	0.780466	C1qtnf4
58.1918	0.460679	0.556022	0.828527	0.407372	0.912991	C230004F18Rik
8.3328	1.50408	2.3182	0.648811	0.51646		C230035I16Rik
5.27767	-0.861529	2.96145	-0.290915	0.771116		C230072F16Rik
62.9636	-1.42213	0.710472	-2.00168	0.0453197	0.468419	C230091D08Rik
23.0092	0.509763	1.10102	0.462992	0.64337	0.973905	C2cd2
108.4	-0.140072	0.389564	-0.359562	0.719175	0.980448	C2cd2l
14.7703	-3.27218	1.39233	-2.35014	0.0187665	0.324944	C2cd3
32.7523	-0.864913	0.925675	-0.934359	0.350119	0.881146	C2cd4b
20.4986	-0.461168	1.02203	-0.451227	0.651826	0.973963	C2cd5
31.4652	-0.254005	0.824956	-0.307902	0.758157	0.984256	C330006A16Rik
33.6872	-0.369953	0.74273	-0.498099	0.618414	0.965055	C330007P06Rik
5.35028	0.44356	3.40056	0.130437	0.89622		C330013E15Rik
26.0655	1.0853	1.46539	0.740622	0.458923	0.93116	C330018D20Rik
6.53998	0.480521	2.72436	0.176379	0.859996		C330027C09Rik
6.73527	4.92182	2.63874	1.86521	0.0621517		C3ar1
52.5722	0.625182	0.585199	1.06832	0.285374	0.849029	C4b
83.1156	-0.0839894	0.484447	-0.173372	0.862359	0.992252	C530008M17Rik
7.66125	-6.24638	2.67896	-2.33164	0.0197196		C630031E19Rik
68.2884	-0.217654	0.544698	-0.399585	0.689462	0.978472	C630043F03Rik
9.92251	1.24205	2.06291	0.602085	0.547117	0.952085	C730002L08Rik
5.39996	1.3154	2.913	0.451563	0.651584		C77080
373.162	-0.168532	0.218694	-0.770628	0.440927	0.926485	C77370
35.3542	-0.552422	0.952496	-0.579972	0.561933	0.953993	C87436
13.2668	0.018205	2.01264	0.00904533	0.992783	0.999692	C920006O11Rik
5.35291	-1.65521	2.98665	-0.554203	0.57944		C920021L13Rik
56.8835	0.790235	0.546579	1.44578	0.148238	0.701012	Caap1
381.822	0.101034	0.222631	0.453818	0.64996	0.973963	Cab39
131.201	0.010063	0.367017	0.0274183	0.978126	0.998948	Cab39l
47.702	0.110986	0.646648	0.171633	0.863726	0.992252	Cabin1
27.5267	-0.589959	0.921707	-0.640072	0.522126	0.947608	Cables1
28.6664	0.00212139	0.844037	0.00251338	0.997995	0.999692	Cables2
83.8224	-0.615918	0.517973	-1.18909	0.234402	0.799515	Cabp1
67.35	-0.0238841	0.610975	-0.0390918	0.968817	0.998948	Cacfd1
26.7518	-0.160051	0.889366	-0.17996	0.857184	0.991937	Cachd1
90.7441	0.321597	0.509707	0.630945	0.528076	0.94819	Cacna1a
61.4963	-0.886604	0.6114	-1.45012	0.147025	0.699432	Cacna1b
38.9661	-0.0668839	0.817814	-0.0817838	0.934819	0.996823	Cacna1c
51.1627	0.6742	0.608288	1.10836	0.267708	0.833103	Cacna1d
111.053	-1.12504	0.508456	-2.21266	0.0269213	0.380453	Cacna1e
20.838	0.993533	1.15918	0.857099	0.39139	0.901554	Cacna1g
18.1887	-0.301585	1.09042	-0.276577	0.782105	0.986311	Cacna1h
538.897	0.138922	0.196192	0.70809	0.478889	0.937909	Cacna2d1
20.0744	0.407141	1.08576	0.374983	0.707673	0.980448	Cacna2d2
130.075	0.417561	0.456638	0.914426	0.360493	0.886	Cacna2d3
37.0565	-0.677328	1.01425	-0.667813	0.504253	0.941676	Cacnb1
40.8113	-0.306743	0.842521	-0.364078	0.7158	0.980448	Cacnb2
68.8527	-0.160366	0.522064	-0.307177	0.758709	0.984256	Cacnb3
464.086	-0.214874	0.232929	-0.922489	0.356273	0.882896	Cacnb4
169.706	0.555227	0.427917	1.29751	0.194455	0.759774	Cacng2
64.345	-0.248363	0.71365	-0.348018	0.727827	0.980448	Cacng3
7.37344	-1.38016	2.39022	-0.577419	0.563657		Cacng5
19.541	-1.38976	1.08857	-1.27668	0.201714	0.765049	Cacng8
6.05565	-2.2274	2.83837	-0.784745	0.432603		Cactin
69.8585	0.00482299	0.654869	0.00736481	0.994124	0.999692	Cacul1
634.014	0.476964	0.198922	2.39774	0.0164966	0.302672	Cacybp
702.44	-0.847759	0.168289	-5.03752	4.71606e-07	0.000101584	Cadm1
1066.06	-0.129989	0.16718	-0.777535	0.436843	0.924699	Cadm2
59.3102	0.362889	0.575842	0.630188	0.528572	0.94819	Cadm3
124.964	0.228921	0.36839	0.621408	0.534331	0.948359	Cadm4
417.816	0.397325	0.240037	1.65527	0.0978697	0.621884	Cadps
298.26	0.159094	0.302224	0.526411	0.598603	0.962925	Cadps2
18.9405	1.54443	1.272	1.21418	0.22468	0.788263	Cahm
852.827	0.470767	0.180667	2.60571	0.00916839	0.22041	Calb1
199.922	0.48303	0.321672	1.50162	0.133195	0.682777	Calb2
19.9962	-0.0914819	1.03654	-0.0882567	0.929673	0.996314	Calca
27.9409	-0.522537	0.907321	-0.575913	0.564674	0.954061	Calcoco1
23.5826	0.266106	0.915183	0.290768	0.771228	0.986234	Calcrl
114.407	0.21572	0.494687	0.436075	0.662783	0.973984	Cald1
37837.3	0.0649046	0.082929	0.782653	0.433831	0.923703	Calm1
9754.21	-0.146127	0.150148	-0.973222	0.330443	0.871006	Calm2
1641.08	0.0958186	0.13109	0.730938	0.464817	0.931575	Calm3
29.5112	1.56535	1.21855	1.28461	0.19893	0.765049	Calml4
236.452	0.164009	0.308959	0.530844	0.595527	0.962459	Caln1
406.576	-0.768894	0.227162	-3.38479	0.000712331	0.0456655	Calr
4.78445	-5.56721	4.12882	-1.34838	0.177537		Calr3
29.5194	1.12805	0.850007	1.32711	0.184472	0.753417	Calu
780.524	-0.300807	0.270761	-1.11097	0.266581	0.832366	Caly
101.714	0.599416	0.448491	1.33652	0.18138	0.749557	Camk1
373.307	-0.645736	0.227888	-2.83357	0.00460312	0.148255	Camk1d
28.5758	-0.135206	0.91107	-0.148404	0.882024	0.992908	Camk1g
2119.07	-0.092765	0.131297	-0.706527	0.479861	0.937909	Camk2a
764.934	-0.246274	0.18527	-1.32928	0.183757	0.752969	Camk2b
122.081	-0.965656	0.475916	-2.02904	0.0424537	0.458602	Camk2d
205.317	0.159489	0.302872	0.526589	0.598479	0.962925	Camk2g
2297.76	-0.633987	0.123964	-5.11428	3.14946e-07	7.5377e-05	Camk2n1
63.7788	-0.430208	0.575237	-0.747879	0.454533	0.928984	Camk2n2
396.27	0.503658	0.270805	1.85985	0.0629064	0.533923	Camk4
55.8466	-0.808704	0.582542	-1.38823	0.165067	0.727114	Camkk1
151.619	-0.187444	0.358916	-0.522252	0.601495	0.962925	Camkk2
12.6727	-0.0979178	1.38287	-0.0708075	0.943551	0.997093	Camkmt
277.156	-0.297495	0.325016	-0.915323	0.360022	0.886	Camkv
194.852	-0.132421	0.364409	-0.363386	0.716317	0.980448	Caml
136.698	-0.755834	0.404289	-1.86954	0.0615481	0.533516	Camsap1
337.335	0.0146237	0.27216	0.0537319	0.957149	0.998948	Camsap2
21.2053	-0.464673	1.08918	-0.426627	0.669651	0.974626	Camsap3
1094.53	-0.421642	0.160564	-2.62601	0.00863913	0.213889	Camta1
43.0334	0.996794	0.68321	1.45899	0.144569	0.696337	Camta2
243.523	-0.414985	0.285915	-1.45143	0.146661	0.699432	Cand1
21.9767	-0.635764	0.981829	-0.64753	0.517289	0.946277	Cant1
856.419	0.111835	0.158979	0.703458	0.48177	0.937978	Canx
114.538	-1.33175	0.427565	-3.11473	0.00184114	0.0899752	Cap1
457.639	-0.00474453	0.205675	-0.0230681	0.981596	0.998948	Cap2
7.68767	0.197416	2.43723	0.081	0.935442		Capg
24.3082	-0.616316	1.19976	-0.513698	0.607463	0.962925	Capn1
42.489	0.771735	0.880783	0.876192	0.380926	0.896481	Capn15
91.3339	0.534736	0.43165	1.23882	0.215412	0.780615	Capn2
17.0403	0.635995	1.75114	0.36319	0.716463	0.980448	Capn3
26.6483	0.151713	0.934944	0.16227	0.871093	0.992252	Capn5
74.8995	1.02132	0.618389	1.65159	0.0986188	0.623312	Capn7
260.037	0.552927	0.271163	2.03909	0.0414408	0.452928	Capns1
451.988	-0.178838	0.230739	-0.775066	0.4383	0.925599	Caprin1
8.08921	5.19472	2.49563	2.08153	0.0373853		Caprin2
36.1046	1.12298	0.910604	1.23322	0.217492	0.782785	Capsl
34.5103	-1.12049	0.761255	-1.4719	0.141048	0.690685	Capza1
890.531	-0.0260862	0.197939	-0.131789	0.895151	0.994243	Capza2
461.923	-0.396926	0.20077	-1.97702	0.0480399	0.479781	Capzb
70.5541	-0.440603	0.693258	-0.635554	0.525067	0.947696	Car10
113.882	0.191087	0.421671	0.453167	0.650429	0.973963	Car11
34.9003	-0.702263	0.725029	-0.968599	0.332745	0.871111	Car12
42.5366	2.19633	0.661141	3.32203	0.000893662	0.0540716	Car14
10.9521	0.937284	1.58778	0.590312	0.554981	0.953717	Car15
1294.53	0.339171	0.140877	2.40756	0.0160593	0.298205	Car2
51.7698	-1.70703	0.708026	-2.41098	0.0159098	0.296965	Car4
25.2615	0.445019	0.988189	0.450338	0.652467	0.973963	Car7
5.72061	6.1606	3.09477	1.99065	0.0465192		Car8
56.1391	0.234138	0.559318	0.418614	0.675498	0.975086	Carf
43.9925	-0.217734	0.664944	-0.327447	0.74333	0.982869	Carhsp1
86.8202	0.35302	0.536503	0.658001	0.510538	0.945245	Carkd
48.3827	-0.37654	0.678306	-0.555118	0.578814	0.957283	Carm1
54.3248	-0.00283154	0.731315	-0.00387184	0.996911	0.999692	Cars
34.6929	1.50531	0.829206	1.81536	0.0694689	0.553538	Cars2
23.3856	1.02605	1.25105	0.820151	0.41213	0.914859	Cartpt
66.576	-0.435281	0.780972	-0.557358	0.577283	0.95712	Casc3
548.746	0.388244	0.191117	2.03145	0.0422097	0.457342	Casc4
180.908	0.30337	0.407658	0.744177	0.456769	0.929941	Casd1
172.512	-0.120559	0.34963	-0.34482	0.73023	0.981346	Cask
72.9302	-0.871518	0.527245	-1.65297	0.0983379	0.622634	Caskin1
10.1091	0.639994	2.53214	0.252748	0.800463	0.987174	Caskin2
8.46553	6.72756	3.10107	2.16943	0.0300498		Casp12
13.0542	0.287676	1.66774	0.172495	0.863049	0.992252	Casp2
31.5915	0.516143	0.753846	0.68468	0.493546	0.941676	Casp3
14.73	0.976364	1.60321	0.609005	0.542521	0.950201	Casp6
118.533	0.385458	0.412254	0.935001	0.349788	0.880798	Casp8ap2
13.4393	1.31141	1.94201	0.675282	0.499496	0.941676	Casp9
50.1058	-0.991428	0.648242	-1.52941	0.126163	0.674057	Cast
12.5965	-0.0122074	1.67774	-0.00727615	0.994195	0.999692	Casz1
62.5129	-0.431393	0.561763	-0.767928	0.44253	0.926485	Cat
8.94533	0.189219	1.98573	0.0952891	0.924085		Cav1
62.8208	0.279594	0.544762	0.513241	0.607783	0.962925	Cav2
70.3039	0.359225	0.494824	0.725965	0.46786	0.933294	Cbfa2t2
45.3811	-0.0293626	0.665505	-0.0441208	0.964808	0.998948	Cbfa2t3
34.634	-1.91029	0.810385	-2.35727	0.01841	0.3224	Cbfb
62.7586	-0.045843	0.574959	-0.0797326	0.93645	0.997093	Cbl
57.8919	-0.999484	0.62663	-1.59502	0.110709	0.643555	Cblb
89.5526	-0.20416	0.468119	-0.436128	0.662744	0.973984	Cbll1
14.0224	0.947639	1.80887	0.523885	0.600359	0.962925	Cbln1
39.8747	0.690839	0.675965	1.022	0.306779	0.860437	Cbln2
25.6248	0.298598	0.925881	0.322501	0.747073	0.982938	Cbln4
107.93	-0.518847	0.494127	-1.05003	0.293705	0.851172	Cbr1
36.7124	0.370298	0.736727	0.502626	0.615227	0.965055	Cbr3
32.5685	0.382069	0.844993	0.452157	0.651156	0.973963	Cbr4
11.4292	-1.5281	1.52222	-1.00386	0.315445	0.863609	Cbs
57.0525	-0.199021	0.563034	-0.35348	0.723729	0.980448	Cbwd1
163.417	-0.202633	0.352179	-0.575369	0.565042	0.954061	Cbx1
102.309	-0.0490393	0.429038	-0.114301	0.908999	0.994243	Cbx3
50.6535	0.296337	0.587883	0.504075	0.614208	0.96498	Cbx4
986.729	0.035863	0.168	0.21347	0.83096	0.990516	Cbx5
108.313	-0.429378	0.39748	-1.08025	0.280031	0.845282	Cbx6
16.1591	0.462256	1.39296	0.331852	0.740001	0.982722	Cbx7
15.8193	1.63494	1.64637	0.993057	0.320682	0.866811	Cbx8
64.5683	1.63777	0.534322	3.06513	0.00217575	0.0989821	Cby1
13.9022	2.26972	1.36568	1.66197	0.0965195	0.619412	Cc2d1a
8.14782	-4.86405	2.41842	-2.01125	0.0442987		Cc2d1b
91.1905	-0.573146	0.604503	-0.948127	0.343065	0.878461	Cc2d2a
228.04	-0.915163	0.319041	-2.86848	0.00412452	0.140474	Ccar1
31.1361	-1.87104	0.851622	-2.19703	0.0280184	0.385881	Ccar2
23.87	0.791159	1.01359	0.780548	0.435068	0.923834	Ccbe1
6.10311	-4.43453	2.75691	-1.60852	0.107722		Ccbl1
21.4472	1.41876	1.44833	0.979583	0.327292	0.870491	Ccbl2
14.9578	-5.75626	1.92394	-2.99191	0.00277234	0.111828	Ccdc101
15.1203	1.43265	4.57988	0.312814	0.754422	0.983414	Ccdc103
61.7463	-0.701413	0.547572	-1.28095	0.200211	0.765049	Ccdc106
266.162	0.259902	0.292597	0.88826	0.374401	0.89366	Ccdc107
60.6672	-0.519028	0.609438	-0.851649	0.394409	0.902619	Ccdc112
31.2672	0.118907	3.27176	0.0363435	0.971008	0.998948	Ccdc113
23.9625	-1.48498	0.922143	-1.61036	0.10732	0.637083	Ccdc115
23.6298	1.74728	1.3077	1.33614	0.181503	0.749557	Ccdc117
50.7933	-1.29351	0.616887	-2.09683	0.0360086	0.424768	Ccdc12
15.6849	1.11059	1.51518	0.732979	0.463571	0.931575	Ccdc120
10.2644	-1.40036	1.81837	-0.770123	0.441227	0.926485	Ccdc122
600.738	0.452301	0.218157	2.07328	0.038146	0.437288	Ccdc124
5.80084	-1.57188	2.68829	-0.584712	0.558741		Ccdc125
16.3138	-0.194423	1.40568	-0.138313	0.889993	0.994243	Ccdc126
306.065	0.0137016	0.252433	0.0542782	0.956714	0.998948	Ccdc127
21.6882	0.855989	1.01395	0.844213	0.39855	0.905705	Ccdc13
43.348	-0.071365	0.798449	-0.0893795	0.92878	0.996314	Ccdc130
115.47	-0.102394	0.414274	-0.247166	0.80478	0.987174	Ccdc132
16.9466	-1.53809	1.43209	-1.07402	0.282814	0.847423	Ccdc134
68.4528	1.86656	0.77092	2.42121	0.015469	0.29238	Ccdc136
38.0589	0.695975	0.687978	1.01162	0.311718	0.862481	Ccdc137
9.08268	1.91806	1.95901	0.979098	0.327531		Ccdc14
17.639	-0.973397	1.32849	-0.732711	0.463735	0.931575	Ccdc141
94.3347	0.504949	0.681745	0.740672	0.458892	0.93116	Ccdc148
48.0622	0.641367	0.677564	0.946578	0.343854	0.879153	Ccdc149
5.11269	-1.98178	2.87551	-0.689194	0.490701		Ccdc15
8.1392	-0.822227	2.11464	-0.388826	0.697405		Ccdc151
21.0922	5.00015	1.39483	3.58478	0.000337365	0.0265213	Ccdc153
8.8886	0.351885	2.21474	0.158883	0.873761		Ccdc159
5.60307	-5.79345	3.20636	-1.80686	0.0707843		Ccdc166
127.599	0.628782	0.409869	1.53411	0.125004	0.670128	Ccdc167
29.3797	0.650358	0.974853	0.667134	0.504686	0.941676	Ccdc171
29.4874	0.591342	0.886246	0.667244	0.504616	0.941676	Ccdc173
188.742	0.369705	0.404036	0.915031	0.360175	0.886	Ccdc174
77.1165	-0.90694	0.556342	-1.63018	0.103063	0.630245	Ccdc176
11.4981	-0.441066	1.49636	-0.29476	0.768177	0.985692	Ccdc177
31.9817	-0.558976	0.79306	-0.704834	0.480914	0.937978	Ccdc18
48.6914	-0.167081	0.603372	-0.276911	0.781848	0.986311	Ccdc181
29.3705	-0.705452	0.82709	-0.852932	0.393697	0.901961	Ccdc184
144.239	0.145322	0.406537	0.357463	0.720745	0.980448	Ccdc186
8.19674	0.854295	2.77703	0.307629	0.758365		Ccdc22
100.785	0.294947	0.419631	0.702873	0.482135	0.937978	Ccdc23
162.817	0.00268842	0.436388	0.00616063	0.995085	0.999692	Ccdc25
63.2994	0.563707	0.522817	1.07821	0.280939	0.846404	Ccdc28a
42.4249	0.0409245	0.825289	0.0495881	0.960451	0.998948	Ccdc28b
35.0058	1.74231	0.833193	2.09113	0.0365165	0.429348	Ccdc30
158.902	-1.09834	0.363745	-3.01952	0.00253174	0.10839	Ccdc32
253.056	-0.25832	0.265389	-0.973362	0.330373	0.871006	Ccdc34
6.54118	-4.5375	2.76179	-1.64296	0.100391		Ccdc37
15.332	-3.07909	1.33867	-2.30011	0.0214419	0.341835	Ccdc38
109.488	0.176259	0.42895	0.410909	0.681139	0.976372	Ccdc39
7.75557	4.12402	2.8716	1.43614	0.150963		Ccdc40
103.368	1.08584	0.558035	1.94584	0.0516745	0.494697	Ccdc43
280.323	0.20702	0.273489	0.756959	0.449075	0.927955	Ccdc47
231.176	0.0149846	0.345057	0.0434266	0.965361	0.998948	Ccdc50
5.08218	-4.15876	3.02791	-1.37347	0.169605		Ccdc51
84.1836	-0.813813	0.569136	-1.42991	0.152743	0.709069	Ccdc53
183.468	-0.36268	0.382454	-0.948297	0.342978	0.878461	Ccdc55
56.6508	0.421314	0.69809	0.603524	0.54616	0.951341	Ccdc58
204.886	0.138057	0.340797	0.405099	0.685405	0.977475	Ccdc59
105.041	-0.0206967	0.549496	-0.0376649	0.969955	0.998948	Ccdc6
14.8323	-2.24365	1.50426	-1.49153	0.135822	0.686735	Ccdc61
25.246	-1.1039	0.975246	-1.13192	0.257667	0.822745	Ccdc65
97.2089	-0.345462	0.469306	-0.736112	0.461662	0.931575	Ccdc66
15.2474	4.04634	1.40899	2.87181	0.00408133	0.1402	Ccdc71
51.381	0.417915	0.60765	0.687757	0.491606	0.941676	Ccdc71l
67.008	0.180716	0.850501	0.212481	0.831731	0.990612	Ccdc74a
25.951	1.25279	1.17484	1.06635	0.286263	0.849962	Ccdc77
5.24023	-0.341102	3.01117	-0.113279	0.909809		Ccdc78
12.373	-2.90529	2.34281	-1.24009	0.214943	0.780615	Ccdc80
89.7937	0.773139	0.552406	1.39959	0.161638	0.722695	Ccdc82
38.7865	-0.639217	0.773068	-0.826858	0.408318	0.913498	Ccdc84
148.851	0.114769	0.396633	0.28936	0.772306	0.986234	Ccdc85a
104.292	-0.13084	0.53252	-0.2457	0.805914	0.987174	Ccdc85b
26.2599	0.111014	0.890681	0.124639	0.900809	0.994243	Ccdc86
752.856	0.207536	0.176639	1.17492	0.240028	0.801087	Ccdc88a
15.9496	0.00798182	1.78949	0.00446038	0.996441	0.999692	Ccdc88b
10.3113	0.769901	1.87881	0.40978	0.681967	0.976839	Ccdc88c
6.17995	-2.60581	2.60353	-1.00088	0.316886		Ccdc9
96.8898	-0.272877	0.459425	-0.593953	0.552543	0.953638	Ccdc90b
77.8722	-0.477429	0.514729	-0.927536	0.353648	0.881925	Ccdc91
70.4628	0.881818	0.675334	1.30575	0.191637	0.758274	Ccdc92
56.1767	-0.185128	0.835336	-0.221621	0.824609	0.990038	Ccdc93
32.1344	2.22746	0.775761	2.87133	0.00408755	0.1402	Ccdc97
1197.32	0.0283181	0.178989	0.158211	0.87429	0.992252	Cck
34.2683	0.06289	0.824247	0.0763	0.93918	0.997093	Cckbr
8.53087	-1.79423	1.83343	-0.978617	0.327769		Ccl12
19.8231	4.88736	1.327	3.68301	0.000230499	0.0203482	Ccl17
27.4905	1.14146	0.872377	1.30845	0.190722	0.757694	Ccl25
317.774	0.329516	0.238977	1.37886	0.167937	0.732259	Ccl27a
6.58852	-6.02719	3.50898	-1.71765	0.0858612		Ccl28
5.38716	6.07532	3.85553	1.57574	0.115085		Ccl5
12.0865	-0.299227	2.00093	-0.149544	0.881125	0.992775	Ccl6
7.45338	2.62009	2.86736	0.913764	0.360841		Ccl7
44.7607	-0.779704	0.692766	-1.12549	0.26038	0.825407	Ccm2
5.64369	6.14246	3.76252	1.63254	0.102566		Ccna1
108.736	0.166605	0.444984	0.374406	0.708103	0.980448	Ccnc
113.79	-0.498513	0.47705	-1.04499	0.296027	0.853567	Ccnd1
298.556	0.104425	0.308656	0.338321	0.735121	0.981346	Ccnd2
29.9854	0.982866	0.83857	1.17207	0.241167	0.801737	Ccnd3
120.014	0.0240105	0.38305	0.0626823	0.95002	0.998231	Ccndbp1
26.5449	-1.03964	1.08392	-0.959148	0.337484	0.875631	Ccne1
36.4843	-0.733705	1.09179	-0.672019	0.501572	0.941676	Ccne2
192.439	0.167483	0.339456	0.493388	0.621739	0.965055	Ccng1
103.65	0.0800234	0.459969	0.173975	0.861885	0.992252	Ccng2
336.92	-0.309054	0.22946	-1.34688	0.17802	0.744535	Ccnh
445.059	0.00277763	0.221776	0.0125245	0.990007	0.999664	Ccni
7.08867	3.98523	2.44344	1.63099	0.102893		Ccnj
41.9345	-0.212518	1.16913	-0.181774	0.85576	0.991897	Ccnk
114.079	-0.0709959	0.45556	-0.155843	0.876157	0.992252	Ccnl1
118.6	0.0214363	0.377182	0.0568328	0.954678	0.99892	Ccnl2
11.6843	1.032	1.60483	0.643061	0.520184	0.947608	Ccnt1
30.5884	0.639666	0.76885	0.831978	0.405422	0.911634	Ccnt2
116.261	0.244319	0.469504	0.520377	0.602801	0.962925	Ccny
106.05	0.223687	1.29932	0.172157	0.863314	0.992252	Ccp110
172.279	-0.180668	0.319552	-0.565379	0.571816	0.955681	Ccpg1
72.9524	0.0927058	0.641771	0.144453	0.885143	0.993515	Ccpg1os
96.1536	-0.883759	0.47529	-1.85941	0.0629691	0.533997	Ccrn4l
26.9834	2.94328	1.21853	2.41544	0.0157162	0.294371	Ccs
61.8518	0.316269	0.655039	0.482825	0.62922	0.968083	Ccsap
9.79079	-0.20866	1.68113	-0.124119	0.901221	0.994243	Ccser1
421.35	0.741026	0.221917	3.33921	0.000840172	0.0520038	Ccser2
392.779	0.316871	0.235256	1.34692	0.178006	0.744535	Cct2
252.61	-0.319359	0.301286	-1.05999	0.28915	0.85067	Cct3
299.481	-0.335953	0.276494	-1.21505	0.224348	0.788263	Cct4
534.214	-0.0391397	0.190463	-0.205497	0.837184	0.990873	Cct5
578.429	0.332576	0.187577	1.77301	0.0762269	0.570604	Cct6a
562.259	-0.15108	0.192093	-0.786493	0.431578	0.923449	Cct7
428.801	0.35279	0.264677	1.33291	0.182562	0.750882	Cct8
138.582	1.0365	0.395839	2.61848	0.00883231	0.215701	Ccz1
8.933	0.529651	1.73262	0.305694	0.759838		Cd109
20.4957	-0.692845	1.31675	-0.526178	0.598765	0.962925	Cd14
17.0974	0.580405	1.29916	0.446753	0.655054	0.973984	Cd151
107.909	0.0457917	0.429263	0.106675	0.915047	0.994857	Cd164
10.0835	-0.369396	2.55935	-0.144332	0.885238	0.993515	Cd164l2
214.334	0.0951678	0.330957	0.287553	0.773689	0.986234	Cd200
9.16948	6.84043	2.43375	2.81065	0.00494415	0.153757	Cd209f
30.1185	-1.32163	0.910534	-1.45149	0.146644	0.699432	Cd24a
9.22853	0.826212	2.62717	0.314487	0.753151	0.983375	Cd276
76.4053	1.18238	0.508947	2.32319	0.020169	0.334262	Cd2ap
21.2987	-0.128084	1.17579	-0.108934	0.913255	0.994699	Cd2bp2
63.0385	-1.35336	0.579651	-2.33478	0.0195548	0.332496	Cd302
49.4697	0.478448	0.911444	0.524934	0.599629	0.962925	Cd320
11.8437	-6.87453	2.17305	-3.16353	0.00155866	0.0837587	Cd33
39.5733	1.19994	1.11282	1.07829	0.280904	0.846404	Cd34
7.18814	0.0045687	2.53656	0.00180114	0.998563		Cd36
5.33988	-2.0591	2.79974	-0.735463	0.462057		Cd37
17.9192	1.76183	1.58162	1.11394	0.265306	0.831728	Cd38
62.9864	0.440501	0.557302	0.790417	0.429284	0.921772	Cd3eap
8.65299	1.30178	2.69414	0.483188	0.628963		Cd44
7.05897	-2.4397	2.11859	-1.15157	0.249498		Cd46
414.47	0.0619408	0.297511	0.208197	0.835075	0.990873	Cd47
8.9094	-2.73769	2.30496	-1.18774	0.234938		Cd52
58.2636	-0.986513	0.586329	-1.68252	0.0924672	0.611199	Cd53
18.8553	-0.0486364	1.09824	-0.0442858	0.964677	0.998948	Cd55
55.2714	1.84358	0.73212	2.51814	0.0117976	0.253932	Cd59a
7.06675	-1.27971	2.40348	-0.532442	0.59442		Cd59b
257.753	0.297377	0.374086	0.794942	0.426647	0.920942	Cd63
16.1097	-0.853552	1.33517	-0.639281	0.52264	0.947608	Cd68
11.174	0.292962	1.77259	0.165273	0.868729	0.992252	Cd74
1353.72	0.0494193	0.161355	0.306276	0.759394	0.984336	Cd81
19.2886	-1.26463	1.49869	-0.843819	0.398771	0.905705	Cd83
5.29913	2.7693	3.41113	0.811841	0.416883		Cd84
188.583	-0.59756	0.339452	-1.76037	0.0783458	0.57768	Cd9
104.441	-0.403384	0.442866	-0.91085	0.362375	0.886956	Cd99l2
169.182	0.706381	0.359837	1.96306	0.0496394	0.485573	Cdadc1
11.0308	-6.77176	2.23271	-3.03297	0.00242158	0.106451	Cdan1
195.041	-0.529386	0.31237	-1.69474	0.0901244	0.606774	Cdc123
25.3035	0.672167	1.06381	0.631848	0.527486	0.94819	Cdc14a
25.9569	1.47588	0.908757	1.62407	0.104362	0.631093	Cdc14b
142.591	0.35008	0.371202	0.943097	0.345631	0.879473	Cdc16
76.8035	-0.0513094	0.540354	-0.0949553	0.92435	0.995886	Cdc23
10.4142	-2.01385	1.94463	-1.0356	0.30039	0.855569	Cdc25a
62.2499	0.182731	0.644992	0.283308	0.776941	0.986234	Cdc26
154.565	0.483073	0.355597	1.35848	0.17431	0.740291	Cdc27
102.181	0.454559	0.401525	1.13208	0.257601	0.822745	Cdc34
216.955	-0.0755091	0.303122	-0.249105	0.80328	0.987174	Cdc37
337.697	-0.230887	0.280247	-0.823869	0.410014	0.914255	Cdc37l1
298.69	0.42213	0.330245	1.27823	0.201168	0.765049	Cdc40
1143.28	0.165693	0.148558	1.11534	0.264706	0.83092	Cdc42
614.611	-0.446762	0.216081	-2.06757	0.0386807	0.439906	Cdc42bpa
52.1534	0.000440156	0.631124	0.000697417	0.999444	0.999692	Cdc42bpb
13.4206	-0.127272	1.34158	-0.0948675	0.92442	0.995886	Cdc42ep1
10.2706	-0.129855	1.7465	-0.0743517	0.940731	0.997093	Cdc42ep2
29.1835	-0.0376599	0.958801	-0.0392781	0.968669	0.998948	Cdc42ep3
40.1065	-0.65364	1.03757	-0.629975	0.528711	0.94819	Cdc42ep4
68.9032	-0.126681	0.509387	-0.248693	0.803598	0.987174	Cdc42se1
248.083	-0.109725	0.294766	-0.372246	0.70971	0.980448	Cdc42se2
217.73	0.0859396	0.32247	0.266505	0.789851	0.987174	Cdc5l
44.7984	0.112886	0.636441	0.17737	0.859217	0.991937	Cdc73
15.7004	0.701722	1.2522	0.560392	0.575212	0.956459	Cdca4
13.436	2.81128	1.68369	1.66971	0.0949762	0.615844	Cdca7
8.23643	-1.33197	2.46964	-0.539339	0.589653		Cdca8
54.0221	-0.0515556	0.574203	-0.0897864	0.928457	0.996314	Cdh10
173.882	-0.312416	0.33104	-0.943743	0.345301	0.879473	Cdh11
66.4322	-0.508541	0.562857	-0.9035	0.36626	0.888327	Cdh12
98.4199	-0.816594	0.526773	-1.55018	0.121097	0.662314	Cdh13
4.771	-5.56155	4.14217	-1.34267	0.17938		Cdh18
187.927	-0.171131	0.313205	-0.546387	0.5848	0.958554	Cdh2
5.87132	1.88082	2.77503	0.677766	0.49792		Cdh20
13.8985	1.03847	1.65011	0.629333	0.529131	0.94819	Cdh22
7.10502	3.94111	2.71776	1.45013	0.147022		Cdh4
24.0961	-0.300747	1.0388	-0.289514	0.772188	0.986234	Cdh7
169.719	-0.341908	0.357583	-0.956164	0.338989	0.875931	Cdh8
56.0559	-0.161489	0.575323	-0.280693	0.778946	0.986234	Cdh9
12.6691	2.17288	1.7879	1.21533	0.224241	0.788263	Cdhr1
235.71	0.147842	0.311552	0.474536	0.635118	0.970266	Cdip1
117.627	-0.257686	0.481826	-0.534812	0.59278	0.962062	Cdipt
36.085	-1.03367	0.994845	-1.03902	0.298795	0.854947	Cdk10
99.9509	-0.469197	0.515615	-0.909975	0.362836	0.886956	Cdk11b
79.4338	-0.189318	0.531151	-0.35643	0.721519	0.980448	Cdk12
177.93	-0.39691	0.319832	-1.241	0.214607	0.780466	Cdk13
741.227	-0.804987	0.185385	-4.34225	1.41034e-05	0.00205261	Cdk14
63.9116	0.721948	0.585226	1.23362	0.217344	0.782785	Cdk16
232.642	-0.267903	0.29982	-0.893547	0.371564	0.892068	Cdk17
11.6485	0.386248	1.64358	0.235004	0.814206	0.988725	Cdk18
85.34	0.214852	0.501077	0.42878	0.668083	0.974043	Cdk19
7.852	-2.34234	2.50477	-0.935152	0.34971		Cdk20
25.1466	0.151709	0.963351	0.15748	0.874866	0.992252	Cdk2ap1
52.2681	-0.185806	0.630375	-0.294755	0.768181	0.985692	Cdk2ap2
110.914	0.48631	0.491876	0.988684	0.322818	0.867757	Cdk4
162.557	0.405387	0.344249	1.1776	0.238956	0.800574	Cdk5
402.651	0.0998749	0.237907	0.419806	0.674627	0.974626	Cdk5r1
38.0377	0.041115	0.691336	0.0594719	0.952576	0.998473	Cdk5r2
7.3895	0.954999	2.56601	0.372173	0.709764		Cdk5rap1
25.5293	0.59872	0.913578	0.655358	0.512237	0.945613	Cdk5rap2
49.3552	0.480603	0.762063	0.630661	0.528262	0.94819	Cdk5rap3
196.163	-0.279022	0.315424	-0.884593	0.376376	0.895947	Cdk7
31.2783	-0.500725	0.906155	-0.552582	0.58055	0.957776	Cdk8
44.2758	0.528906	0.772516	0.684654	0.493562	0.941676	Cdk9
58.3758	-1.18606	0.579694	-2.04601	0.0407557	0.450656	Cdkal1
80.0495	0.774114	0.46369	1.66946	0.0950257	0.615844	Cdkl1
205.657	0.699589	0.397408	1.76038	0.0783436	0.57768	Cdkl2
29.8586	0.0429605	0.908453	0.0472897	0.962282	0.998948	Cdkl3
46.8005	-1.49405	0.709012	-2.10723	0.035098	0.419075	Cdkl4
188.425	-0.251951	0.399572	-0.630552	0.528334	0.94819	Cdkl5
13.7709	-1.49301	1.70443	-0.875956	0.381054	0.896481	Cdkn1a
247.434	-1.54702	0.285722	-5.41445	6.14785e-08	1.74243e-05	Cdkn1b
32.2881	2.46478	1.17435	2.09884	0.035831	0.4236	Cdkn1c
44.541	-0.110483	0.622035	-0.177615	0.859025	0.991937	Cdkn2aip
147.862	-0.219371	0.44286	-0.49535	0.620353	0.965055	Cdkn2aipnl
176.952	-0.0960284	0.324286	-0.296122	0.767137	0.985692	Cdkn2d
26.1599	-1.21954	0.995859	-1.22461	0.220722	0.787146	Cdo1
10.2343	0.749226	2.1137	0.354462	0.722992	0.980448	Cdon
51.8201	1.07002	0.577734	1.85211	0.0640107	0.538307	Cdpf1
55.3558	-1.18466	0.578026	-2.04949	0.0404141	0.449185	Cdr1
[truncated: 9,927 more rows]

## Sheet: 5xFAD vs WT_females
baseMean	log2FoldChange	lfcSE	stat	pvalue	padj	GENE
222.345	-0.147143	0.269119	-0.546759	0.584545	0.979622	0610007P14Rik
219.482	-0.189454	0.303644	-0.623933	0.532672	0.970635	0610009B22Rik
19.3148	-1.48703	1.13766	-1.3071	0.191179	0.808302	0610009O20Rik
131.424	0.198781	0.469876	0.423049	0.672259	0.98579	0610010F05Rik
122.904	-0.312984	0.471057	-0.664429	0.506415	0.964409	0610010K14Rik
168.251	0.216705	0.310173	0.698658	0.484766	0.957634	0610011F06Rik
342.496	-0.702292	0.247731	-2.8349	0.00458405	0.129538	0610012G03Rik
15.8701	0.676446	1.24663	0.542619	0.587392	0.980495	0610030E20Rik
140.144	-0.295468	0.408438	-0.723411	0.469428	0.954072	0610037L13Rik
8.79737	0.267427	1.44396	0.185205	0.853069	0.995542	0610040B10Rik
5.33698	-1.6154	1.9051	-0.847932	0.396476		0610043K17Rik
146.08	-0.110693	0.410483	-0.269665	0.787418	0.992395	1110001J03Rik
16.2514	-1.12605	1.09395	-1.02934	0.303322	0.895679	1110002L01Rik
171.695	-0.173125	0.354205	-0.488769	0.625005	0.985263	1110004E09Rik
742.924	-0.377463	0.172674	-2.18599	0.0288161	0.370376	1110004F10Rik
34.0964	1.03214	0.714779	1.444	0.148738	0.737569	1110007C09Rik
204.312	-0.227903	0.329221	-0.69225	0.488781	0.958887	1110008F13Rik
15.0413	-0.198286	1.40761	-0.140868	0.887974	0.995542	1110008L16Rik
593.038	-0.414503	0.173604	-2.38764	0.0169568	0.281708	1110008P14Rik
49.0041	0.701117	0.626681	1.11878	0.263235	0.881783	1110012L19Rik
29.3989	-0.586935	0.744387	-0.788481	0.430416	0.945451	1110017D15Rik
7.79468	-2.34073	1.61965	-1.44521	0.1484	0.737131	1110019D14Rik
132.139	-0.122116	0.511008	-0.238971	0.811128	0.992395	1110032A03Rik
10.5539	-0.237278	1.41916	-0.167196	0.867216	0.995542	1110032F04Rik
34.6212	-1.68726	1.01153	-1.66802	0.0953113	0.631772	1110034G24Rik
56.4805	-0.898667	0.574307	-1.56478	0.117633	0.684637	1110037F02Rik
39.2639	0.652504	0.743777	0.877284	0.380332	0.927433	1110038B12Rik
48.3981	0.0149701	0.652638	0.0229379	0.9817	0.997932	1110038F14Rik
15.2371	0.864612	1.13382	0.762566	0.445722	0.949273	1110046J04Rik
109.589	-0.498345	0.421968	-1.181	0.237601	0.860181	1110051M20Rik
83.8485	-0.697433	0.484528	-1.43941	0.150035	0.741307	1110059E24Rik
84.8575	-0.611374	0.433265	-1.41109	0.158219	0.756634	1110059G10Rik
353.359	0.152466	0.246653	0.618137	0.536485	0.97117	1110065P20Rik
63.3385	-0.10624	0.523644	-0.202887	0.839224	0.995488	1190002N15Rik
35.09	-0.521443	0.781828	-0.666954	0.504802	0.964142	1190007I07Rik
40.7272	0.0324111	0.658676	0.0492064	0.960755	0.995542	1200014J11Rik
27.6679	0.0268567	1.0492	0.0255974	0.979578	0.997724	1300002E11Rik
15.9221	0.390671	1.07249	0.364264	0.715661	0.985965	1500004A13Rik
41.2418	-1.86689	0.961251	-1.94215	0.0521191	0.496041	1500009C09Rik
51.6697	-0.507051	0.57058	-0.888659	0.374186	0.925962	1500009L16Rik
225.919	-0.667252	0.288875	-2.30983	0.0208977	0.314956	1500011B03Rik
301.582	-0.0919097	0.256243	-0.358682	0.719833	0.985965	1500011K16Rik
52.8979	-0.223677	0.573319	-0.390144	0.69643	0.985813	1500012F01Rik
6.58646	-2.01501	1.89262	-1.06467	0.287026	0.888289	1500015A07Rik
15.2346	1.69834	1.4603	1.16301	0.244826	0.868175	1500015O10Rik
46.6902	-0.177345	0.68674	-0.258242	0.79622	0.992395	1500026H17Rik
8.57621	-0.671363	1.64488	-0.408152	0.683162	0.98579	1600002H07Rik
8.55791	-0.816999	1.76093	-0.463959	0.642677	0.985263	1600002K03Rik
26.0189	0.582894	1.09836	0.530696	0.59563	0.98276	1600012H06Rik
28.735	0.624771	0.967399	0.645825	0.518392	0.966856	1600014C10Rik
36.4014	0.268809	0.662781	0.405577	0.685053	0.98579	1600020E01Rik
5.79155	0.715223	2.02196	0.353727	0.723544	0.986456	1600029O15Rik
52.2338	0.537136	0.668726	0.803222	0.421846	0.94223	1700001L19Rik
25.01	-0.426448	0.810224	-0.526334	0.598656	0.982811	1700003E16Rik
6.84085	-1.21086	1.84213	-0.657315	0.510979	0.965262	1700003M07Rik
8.59533	-0.306846	2.13512	-0.143714	0.885727	0.995542	1700007K13Rik
14.3767	0.594277	1.38053	0.430469	0.666855	0.98579	1700008J07Rik
6.80932	6.35008	2.36802	2.6816	0.00732714	0.170036	1700008O03Rik
5.26402	-5.79503	2.20337	-2.63008	0.0085365		1700012B09Rik
8.43034	1.45038	1.56834	0.924787	0.355077	0.919672	1700016K19Rik
13.7791	1.59607	1.59576	1.00019	0.317217	0.903352	1700017B05Rik
26.9832	-1.10166	0.813072	-1.35494	0.175438	0.784059	1700019D03Rik
10.3351	-0.685597	1.44655	-0.473953	0.635533	0.985263	1700019G17Rik
803.281	-0.281412	0.169503	-1.66021	0.0968717	0.634165	1700020I14Rik
175.498	-0.161467	0.342214	-0.471832	0.637047	0.985263	1700021F05Rik
23.8154	-0.605666	1.02765	-0.589371	0.555613	0.976997	1700021K19Rik
10.8435	0.0940092	1.68244	0.0558766	0.95544	0.995542	1700024P16Rik
267.968	-0.148214	0.30059	-0.493079	0.621957	0.985187	1700025G04Rik
9.82289	0.0398947	1.7318	0.0230365	0.981621	0.997932	1700028P14Rik
7.01977	1.29636	2.16585	0.598545	0.549476	0.974891	1700029J07Rik
8.79778	-0.0561537	1.47564	-0.0380538	0.969645	0.996558	1700030J22Rik
10.4161	4.15472	1.5534	2.67459	0.00748198	0.172583	1700030K09Rik
108.597	-1.46229	0.561393	-2.60476	0.00919388	0.196736	1700037H04Rik
7.04306	-3.52367	2.14026	-1.64637	0.0996867	0.639983	1700040L02Rik
32.0807	-0.558302	1.02453	-0.544933	0.5858	0.980336	1700047M11Rik
10.7218	0.439314	1.57058	0.279715	0.779696	0.992326	1700048O20Rik
20.9146	1.21796	1.03376	1.17818	0.238725	0.860206	1700049G17Rik
38.8766	-0.0850687	0.709698	-0.119866	0.904589	0.995542	1700066M21Rik
18.6938	0.503693	1.26131	0.39934	0.689643	0.98579	1700084C01Rik
136.568	0.259021	0.396123	0.653891	0.513182	0.965959	1700086L19Rik
11.7563	1.90675	1.40722	1.35498	0.175425	0.784059	1700086O06Rik
18.7721	0.0685208	1.12198	0.0610711	0.951303	0.995542	1700088E04Rik
33.6935	0.231441	0.758889	0.304974	0.760386	0.991173	1700094D03Rik
26.2833	-0.996984	0.813416	-1.22567	0.220321	0.839224	1700096K18Rik
5.85403	-0.367433	1.86663	-0.196843	0.843951	0.995488	1700101I11Rik
10.4747	1.59574	1.3253	1.20406	0.228567	0.850386	1700113A16Rik
9.01111	0.837324	1.80154	0.464781	0.642088	0.985263	1700123M08Rik
66.518	-0.471539	0.602456	-0.782695	0.433806	0.946245	1700123O20Rik
8.47535	-0.583487	2.32265	-0.251216	0.801647	0.992395	1700124L16Rik
8.90015	-1.4513	1.85408	-0.782763	0.433767	0.946245	1810010H24Rik
94.2681	0.384085	0.509035	0.754535	0.450528	0.949273	1810013L24Rik
353.003	-0.175371	0.238755	-0.734522	0.462631	0.953951	1810022K09Rik
93.1593	0.0897344	0.455237	0.197116	0.843737	0.995488	1810026B05Rik
45.5683	-0.617818	0.746423	-0.827705	0.407838	0.939239	1810026J23Rik
45.2739	0.863432	0.673672	1.28168	0.199955	0.819238	1810030O07Rik
7.59015	-1.44902	1.72026	-0.842322	0.399608	0.935061	1810032O08Rik
630.161	-0.0878615	0.175829	-0.499698	0.617288	0.985187	1810037I17Rik
5.99245	0.993376	2.23968	0.443535	0.657379	0.98579	1810041H14Rik
63.8543	-0.442653	0.650391	-0.680595	0.496127	0.962592	1810041L15Rik
35.6959	-0.145603	1.1479	-0.126843	0.899065	0.995542	1810043G02Rik
360.936	-0.344531	0.23804	-1.44737	0.147794	0.736292	1810043H04Rik
9.64843	0.15131	1.60508	0.0942689	0.924896	0.995542	1810055G02Rik
83.6823	-0.625251	0.554093	-1.12842	0.259141	0.881012	1810058I24Rik
5.48548	1.16719	2.27871	0.512216	0.6085		2010001A14Rik
172.848	-0.346147	0.336025	-1.03012	0.302954	0.895679	2010012O05Rik
1476.36	-0.264344	0.121622	-2.17349	0.0297431	0.378177	2010107E04Rik
42.604	0.926526	0.776532	1.19316	0.232807	0.855532	2010107G23Rik
35.5234	-0.385384	0.812132	-0.474534	0.635119	0.985263	2010111I01Rik
153.085	-0.353536	0.370808	-0.953419	0.340378	0.913988	2010204K13Rik
273.683	-0.319863	0.280488	-1.14038	0.254127	0.876701	2010300C02Rik
33.2045	-1.63955	0.81918	-2.00145	0.0453443	0.463729	2010315B03Rik
44.4604	1.4184	0.755579	1.87723	0.0604861	0.520115	2010320M18Rik
5.29983	-4.78734	2.40756	-1.98846	0.0467603		2210011C24Rik
154.341	-0.233109	0.362014	-0.643921	0.519627	0.966856	2210013O21Rik
61.5929	-0.805648	0.561532	-1.43473	0.151363	0.744493	2210015D19Rik
31.7236	0.31437	0.814902	0.385776	0.699662	0.985813	2210016F16Rik
562.821	-0.334456	0.220284	-1.5183	0.128939	0.707589	2210016L21Rik
57.7592	-0.351869	0.653881	-0.538123	0.590492	0.981288	2210018M11Rik
10.2313	-0.0972386	1.33877	-0.0726328	0.942098	0.995542	2210404O09Rik
63.1312	0.660896	0.613654	1.07698	0.281487	0.888289	2210408F21Rik
48.3316	-0.924668	0.789334	-1.17145	0.241417	0.862818	2210408I21Rik
65.3612	-0.960546	0.643717	-1.49219	0.13565	0.714356	2300009A05Rik
13.4328	0.427817	1.3439	0.318339	0.750227	0.989837	2310002F09Rik
122.306	0.392921	0.390272	1.00679	0.314037	0.901907	2310009A05Rik
74.0118	0.175272	0.477886	0.366765	0.713794	0.985965	2310009B15Rik
48.0198	-0.401689	0.653268	-0.614891	0.538627	0.971981	2310010J17Rik
38.4644	1.21332	0.679134	1.78657	0.0740077	0.569401	2310011J03Rik
9.57708	0.190157	1.64466	0.115621	0.907953	0.995542	2310015A10Rik
16.5119	1.3331	1.41062	0.94505	0.344634	0.915581	2310022A10Rik
77.5361	-0.60116	0.48214	-1.24686	0.212449	0.833246	2310022B05Rik
84.5928	0.188665	0.460003	0.410139	0.681704	0.98579	2310033P09Rik
121.64	0.215187	0.396896	0.542173	0.587699	0.980495	2310035C23Rik
131.386	-0.374207	0.400531	-0.934278	0.35016	0.916687	2310036O22Rik
57.3185	-0.589151	0.660295	-0.892254	0.372257	0.925962	2310039H08Rik
6.61806	1.26959	1.769	0.717687	0.47295	0.954845	2310040G24Rik
68.4493	-0.583168	0.523337	-1.11433	0.265139	0.881831	2310045N01Rik
10.1202	-0.0368805	1.28869	-0.0286187	0.977169	0.997641	2310047M10Rik
42.0002	-0.966869	0.821236	-1.17733	0.239062	0.860206	2310057M21Rik
49.8728	0.11003	0.612655	0.179596	0.85747	0.995542	2310061I04Rik
24.0941	1.34336	0.865287	1.5525	0.120542	0.689532	2310067B10Rik
17.8788	0.039538	1.24384	0.031787	0.974642	0.997509	2310069G16Rik
56.7898	-0.350249	0.603221	-0.580632	0.561489	0.978238	2410002F23Rik
101.292	-0.356173	0.440271	-0.808984	0.418524	0.94223	2410004B18Rik
178.895	0.147251	0.358159	0.411133	0.680975	0.98579	2410006H16Rik
490.806	-0.175925	0.199706	-0.880919	0.378362	0.925962	2410015M20Rik
8.34354	1.40727	1.86664	0.753904	0.450907	0.949273	2410016O06Rik
130.595	-0.0151205	0.48932	-0.0309009	0.975349	0.997641	2410089E03Rik
11.2835	-0.764347	1.26034	-0.606463	0.544208	0.973101	2410127L17Rik
19.9828	0.865629	1.15915	0.746782	0.455195	0.950566	2410131K14Rik
7.08384	0.723665	1.74426	0.414884	0.678227	0.98579	2500002B13Rik
34.1052	-0.0189178	1.04019	-0.0181869	0.98549	0.997932	2500004C02Rik
45.3349	-1.18665	0.636056	-1.86563	0.0620929	0.523887	2510002D24Rik
4.7767	-1.0475	2.40416	-0.435702	0.663053		2510003B16Rik
101.308	-0.76573	0.463651	-1.65152	0.0986319	0.637536	2510009E07Rik
38.1886	0.17443	0.692256	0.251973	0.801062	0.992395	2510039O18Rik
23.6867	1.12927	0.85964	1.31365	0.188963	0.805662	2610001J05Rik
100.618	0.245343	0.404213	0.606964	0.543875	0.973101	2610002M06Rik
50.9267	0.729305	0.713831	1.02168	0.306933	0.897169	2610008E11Rik
22.5655	-0.311692	0.831263	-0.374962	0.707689	0.985965	2610015P09Rik
19.0638	-0.011044	1.1386	-0.00969958	0.992261	0.997932	2610035D17Rik
31.0514	-0.579644	1.01798	-0.569408	0.569079	0.9788	2610044O15Rik8
21.0893	-0.16663	1.05806	-0.157487	0.874861	0.995542	2610100L16Rik
131.31	-0.381072	0.41263	-0.923519	0.355737	0.919672	2610301B20Rik
33.4933	0.299749	0.80175	0.373868	0.708502	0.985965	2610306M01Rik
7.61074	3.06183	1.75511	1.74452	0.0810677	0.587616	2610316D01Rik
249.156	-0.111507	0.273125	-0.408264	0.68308	0.98579	2610507B11Rik
43.7183	-1.03286	0.682804	-1.51267	0.130363	0.709437	2610507I01Rik
77.9901	-0.744663	0.661363	-1.12595	0.260186	0.881616	2610524H06Rik
10.7577	-0.5416	1.46966	-0.368521	0.712484	0.985965	2610528A11Rik
297.977	-0.0322906	0.278386	-0.115992	0.907659	0.995542	2700029M09Rik
6.57908	0.950704	2.44676	0.388555	0.697605	0.985813	2700046G09Rik
38.3498	0.303943	0.72413	0.419736	0.674678	0.98579	2700049A03Rik
4.38538	5.7253	2.76369	2.07161	0.0383017		2700054A10Rik
289.697	0.00339526	0.268023	0.0126678	0.989893	0.997932	2700060E02Rik
37.997	0.150563	0.728123	0.206783	0.83618	0.995113	2700062C07Rik
13.1076	-1.58622	1.26516	-1.25378	0.209924	0.829628	2700081O15Rik
131.693	-0.39836	0.389106	-1.02378	0.305938	0.897007	2700094K13Rik
13.7185	-1.19282	1.31803	-0.905003	0.365464	0.925068	2700097O09Rik
55.7216	0.808101	0.577144	1.40017	0.161462	0.761962	2810001G20Rik
15.164	-0.231355	1.09453	-0.211373	0.832596	0.995113	2810002D19Rik
201.367	-0.252353	0.305404	-0.826291	0.408639	0.939239	2810004N23Rik
62.3968	-0.602152	0.521835	-1.15391	0.248536	0.872186	2810006K23Rik
142.661	-0.365965	0.373935	-0.978688	0.327734	0.907536	2810013P06Rik
15.3446	-1.59729	1.35929	-1.17509	0.239958	0.860206	2810021J22Rik
57.0902	0.148899	0.665899	0.223605	0.823065	0.993055	2810025M15Rik
7.56028	-0.0192974	1.74633	-0.0110503	0.991183	0.997932	2810032G03Rik
37.1122	0.27421	0.992042	0.27641	0.782233	0.992395	2810403A07Rik
7.36062	1.52285	1.66405	0.915146	0.360115	0.921321	2810403D21Rik
331.216	-0.537748	0.25075	-2.14456	0.0319883	0.393008	2810428I15Rik
8.04698	-0.315246	1.60254	-0.196717	0.844049	0.995488	2810454H06Rik
31.2429	1.38178	0.712269	1.93997	0.0523835	0.496652	2810459M11Rik
40.0934	-0.486665	0.795478	-0.611789	0.540677	0.971981	2810468N07Rik
67.5089	0.889755	0.532912	1.66961	0.0949968	0.630822	2810474O19Rik
6.36049	0.525995	1.8361	0.286475	0.774515	0.992096	2900008C10Rik
7.18069	-3.9022	1.86602	-2.09118	0.0365115	0.416445	2900009J06Rik
557.702	-0.119723	0.211849	-0.565136	0.571981	0.9788	2900011O08Rik
62.9633	0.120757	0.538702	0.224163	0.822631	0.992853	2900026A02Rik
120.039	0.388592	0.381707	1.01804	0.30866	0.898002	2900052N01Rik
113.372	-0.361744	0.394874	-0.916099	0.359615	0.921321	2900055J20Rik
11.901	-0.0015789	1.24776	-0.00126539	0.99899	0.999735	2900060B14Rik
45.2088	0.388059	0.616931	0.629015	0.529339	0.96948	2900076A07Rik
5.12647	-0.585604	1.94657	-0.300838	0.763538		2900079G21Rik
105.325	1.64222	0.43236	3.79828	0.000145705	0.0114278	2900092D14Rik
185.977	0.0979569	0.321742	0.304458	0.760779	0.991173	2900097C17Rik
35.6748	-1.1831	0.86013	-1.37549	0.168979	0.774791	3010026O09Rik
6.30414	0.867367	2.22111	0.39051	0.69616	0.98579	3110001I22Rik
30.5195	0.692352	0.797916	0.8677	0.385558	0.930976	3110002H16Rik
19.6312	0.379153	1.18596	0.319701	0.749195	0.989837	3110009E18Rik
5.30942	-5.80608	2.51583	-2.30782	0.0210092		3110021A11Rik
13.7299	-0.961501	1.54803	-0.621114	0.534525	0.970761	3110021N24Rik
335.431	-0.400718	0.261626	-1.53164	0.125611	0.700527	3110035E14Rik
51.4691	0.665525	0.626749	1.06187	0.288296	0.888289	3110039I08Rik
63.8032	-0.314791	0.612354	-0.514067	0.607205	0.985187	3110039M20Rik
45.8354	0.245517	0.688303	0.356699	0.721317	0.9861	3110040N11Rik
31.4691	0.0333219	0.783478	0.0425307	0.966076	0.995542	3110043O21Rik
9.35132	0.62401	1.64542	0.379241	0.704509	0.985965	3110045C21Rik
24.9307	0.150998	0.846415	0.178398	0.858411	0.995542	3110052M02Rik
17.7515	-2.01329	1.20281	-1.67382	0.0941656	0.629476	3110056K07Rik
7.0118	0.280466	1.97596	0.14194	0.887128	0.995542	3110057O12Rik
10.4332	0.564482	1.32736	0.425267	0.670642	0.98579	3110062M04Rik
18.8217	-0.498899	0.918247	-0.543317	0.586911	0.980495	3110082I17Rik
10.0314	-1.00629	1.66034	-0.606074	0.544465	0.973101	3110082J24Rik
9.5167	1.96917	1.46868	1.34077	0.179995	0.789117	3300002I08Rik
21.7034	0.23142	0.9937	0.232887	0.815849	0.992395	3632451O06Rik
8.50937	5.68453	1.87478	3.0321	0.00242855	0.0885371	3830403N18Rik
109.603	0.48944	0.476428	1.02731	0.304273	0.895832	3830406C13Rik
18.37	0.0252809	0.978536	0.0258354	0.979389	0.997724	4632404H12Rik
76.1555	-0.321373	0.497584	-0.645868	0.518365	0.966856	4632415L05Rik
5.24284	1.36757	2.40972	0.567521	0.57036		4632427E13Rik
31.0826	2.33265	0.778916	2.99474	0.00274679	0.0959914	4632428N05Rik
38.1637	-0.285774	0.693916	-0.411828	0.680466	0.98579	4732471J01Rik
7.06069	-2.59767	1.60407	-1.61942	0.105357	0.65057	4732491K20Rik
32.6274	0.0288752	0.792634	0.0364294	0.97094	0.996859	4831440E17Rik
68.8107	-0.294016	0.536162	-0.54837	0.583438	0.979622	4833420G17Rik
11.2638	-2.05749	1.18294	-1.7393	0.081982	0.590111	4833422C13Rik
188.533	0.00132706	0.291507	0.0045524	0.996368	0.999583	4833439L19Rik
16.1869	-1.46048	1.1597	-1.25936	0.207901	0.828518	4921504A21Rik
105.771	-0.194034	0.48562	-0.39956	0.689481	0.98579	4921524J17Rik
7.21548	-0.0818361	1.713	-0.0477736	0.961897	0.995542	4921531C22Rik
68.9151	-0.224724	0.540807	-0.415534	0.677751	0.98579	4930402H24Rik
8.28866	-1.0299	1.80999	-0.569009	0.56935	0.9788	4930412C18Rik
4.88439	3.46353	2.36904	1.462	0.143741		4930429B21Rik
179.968	-0.0479075	0.406647	-0.117811	0.906217	0.995542	4930430F08Rik
28.2247	1.70805	2.3361	0.731155	0.464685	0.954042	4930447C04Rik
17.3684	-4.9658	1.28784	-3.85592	0.000115297	0.0097278	4930447M23Rik
13.3958	2.03203	1.34365	1.51232	0.130452	0.709437	4930452B06Rik
32.1961	0.918813	0.781222	1.17612	0.239546	0.860206	4930453N24Rik
7.19799	2.51053	1.82755	1.37372	0.169529	0.775254	4930469G21Rik
6.60545	0.0344779	1.84071	0.0187307	0.985056	0.997932	4930481A15Rik
25.4489	-1.11508	2.40506	-0.463638	0.642907	0.985263	4930503L19Rik
5.29998	0.406914	1.96532	0.207047	0.835973		4930513N10Rik
14.2554	0.786176	1.59774	0.492054	0.622681	0.985187	4930523C07Rik
17.3558	-0.931366	1.26371	-0.737007	0.461118	0.952729	4930526I15Rik
4.19287	-0.377053	2.79297	-0.135001	0.892611		4930563E22Rik
26.5263	0.716577	1.02617	0.698301	0.484989	0.957634	4930570G19Rik
8.25679	3.15609	2.01997	1.56245	0.118183	0.684637	4930579G24Rik
8.11982	0.244484	1.77728	0.137561	0.890588	0.995542	4930579K19Rik
45.3848	-0.292401	0.750499	-0.389609	0.696826	0.985813	4931406C07Rik
69.0649	-0.44566	0.552722	-0.8063	0.42007	0.94223	4931406P16Rik
6.54068	-1.9173	1.62656	-1.17874	0.238502	0.860206	4931408D14Rik
10.7143	-0.880406	1.47017	-0.598846	0.549276	0.974864	4931414P19Rik
4.86479	-1.78898	2.12295	-0.842686	0.399404		4931428F04Rik
9.28487	0.0251972	1.73596	0.0145148	0.988419	0.997932	4931440P22Rik
15.297	2.58557	1.1549	2.23879	0.0251697	0.344502	4932416H05Rik
528.048	-0.209197	0.195894	-1.06791	0.285561	0.888289	4932438A13Rik
8.59408	1.31377	2.05499	0.639309	0.522622	0.966856	4932438H23Rik
9.79911	0.521552	1.38395	0.376858	0.706279	0.985965	4933404O12Rik
8.33091	-1.4164	1.67916	-0.843519	0.398938	0.935061	4933412E12Rik
14.7951	0.887008	1.2529	0.707961	0.478969	0.955363	4933412O06Rik
25.7685	0.572282	0.92539	0.618423	0.536297	0.97117	4933421O10Rik
40.4581	-0.991103	0.666962	-1.486	0.13728	0.718575	4933427D14Rik
6.19591	1.52747	2.49422	0.612404	0.540271	0.971981	4933427G17Rik
68.5652	0.256666	0.607804	0.422284	0.672818	0.98579	4933431E20Rik
417.795	0.279492	0.220764	1.26602	0.205506	0.825928	4933434E20Rik
7.53328	2.471	1.63854	1.50805	0.131541	0.710836	5031425E22Rik
92.0593	0.248156	0.474404	0.52309	0.600911	0.98405	5031426D15Rik
27.8954	0.283802	0.800137	0.354691	0.722821	0.986136	5031439G07Rik
42.1008	0.61313	0.678582	0.903547	0.366236	0.925368	5330417C22Rik
7.46531	0.24027	1.63627	0.14684	0.883258	0.995542	5330426P16Rik
63.8557	-0.407074	0.578852	-0.703245	0.481903	0.956861	5330434G04Rik
9.35531	-1.32958	1.58687	-0.837865	0.402106	0.93682	5430402O13Rik
46.0019	-0.619713	0.640216	-0.967975	0.333057	0.909676	5430405H02Rik
67.1818	-0.886866	0.54057	-1.64061	0.100878	0.642702	5430416N02Rik
29.5208	0.289671	0.719742	0.402464	0.687342	0.98579	5530601H04Rik
11.5258	1.18009	1.35583	0.870385	0.38409	0.930603	5730408K05Rik
69.4665	1.52636	0.573638	2.66084	0.0077945	0.176039	5730409E04Rik
243.699	0.131432	0.327453	0.401377	0.688143	0.98579	5730455P16Rik
5.68408	0.804783	2.01628	0.399142	0.689788	0.98579	5730480H06Rik
17.7533	-0.229624	1.54287	-0.148829	0.881688	0.995542	5730508B09Rik
25.3509	-1.15703	1.06961	-1.08173	0.279372	0.888289	5730522E02Rik
4.51408	-4.56764	2.50173	-1.82579	0.0678819		5830415F09Rik
6.05978	-0.472115	2.32515	-0.203047	0.839098	0.995488	5830416P10Rik
23.9523	0.621976	0.814565	0.763569	0.445124	0.949273	5830417I10Rik
5.89119	-5.95428	2.57078	-2.31614	0.0205505	0.312634	5830454E08Rik
15.3062	0.942065	1.43311	0.657355	0.510953	0.965262	5930403L14Rik
6.13715	-0.647251	2.20165	-0.293984	0.76877	0.991307	5930412G12Rik
15.0859	-0.541268	1.08667	-0.498099	0.618414	0.985187	5930430L01Rik
28.3737	-0.32008	0.813862	-0.393285	0.694109	0.98579	6030419C18Rik
43.3104	-0.927735	0.779971	-1.18945	0.234264	0.856537	6030458C11Rik
125.901	0.0650929	0.396205	0.164291	0.869502	0.995542	6330403A02Rik
337.398	0.264416	0.235418	1.12317	0.261363	0.881616	6330403K07Rik
10.8798	-0.248295	1.56359	-0.158797	0.873829	0.995542	6330415B21Rik
9.37532	1.61998	1.9515	0.83012	0.406471	0.939239	6330415G19Rik
7.12932	-1.40453	1.89525	-0.741078	0.458646	0.950747	6330416G13Rik
17.4477	0.188478	1.04482	0.180392	0.856845	0.995542	6330418K02Rik
208.683	-0.545323	0.358865	-1.51958	0.128617	0.706947	6430548M08Rik
8.62515	0.8668	1.42636	0.607701	0.543386	0.973101	6430571L13Rik
29.8817	-1.71274	0.965799	-1.7734	0.0761629	0.575952	6430573F11Rik
10.1587	-1.02199	1.33624	-0.764825	0.444376	0.949273	6530402F18Rik
27.9348	-0.280927	0.835417	-0.336272	0.736666	0.989099	6530403H02Rik
7.27904	1.12413	2.02717	0.554533	0.579214	0.979539	6720489N17Rik
11.7873	-0.677505	1.51235	-0.447981	0.654167	0.98579	6820408C15Rik
9.16343	0.508988	1.25452	0.405722	0.684947	0.98579	6820431F20Rik
17.5558	-0.00174607	1.29438	-0.00134896	0.998924	0.999735	8030462N17Rik
108.932	-0.476344	0.417712	-1.14037	0.254134	0.876701	8430419L09Rik
22.4303	-0.460143	0.853131	-0.539358	0.58964	0.981288	8430429K09Rik
69.7132	-0.687372	0.478813	-1.43557	0.151123	0.744089	9030624J02Rik
6.26076	-0.217962	1.79056	-0.121728	0.903114	0.995542	9130011E15Rik
5.15981	-4.02811	2.37296	-1.69751	0.0896007		9130019O22Rik
15.6282	3.36755	1.35588	2.48366	0.0130041	0.244593	9130023H24Rik
44.1946	0.146429	0.718105	0.203911	0.838423	0.995488	9130024F11Rik
16.5739	2.61708	1.24849	2.0962	0.0360645	0.415144	9130221H12Rik
94.5395	-0.549333	0.438222	-1.25355	0.210006	0.829628	9130401M01Rik
15.4952	-0.369866	1.10865	-0.333619	0.738667	0.989099	9230110C19Rik
41.3891	0.213331	0.665025	0.320787	0.748372	0.989837	9230114K14Rik
9.98988	-1.88761	1.88991	-0.998781	0.317901	0.903402	9330020H09Rik
13.3586	-0.201892	1.51489	-0.133272	0.893978	0.995542	9330102E08Rik
42.008	0.571412	0.647229	0.882859	0.377313	0.925962	9330133O14Rik
34.0876	-0.85757	1.12383	-0.763078	0.445417	0.949273	9330151L19Rik
238.013	0.140066	0.312143	0.448724	0.653631	0.98579	9330159F19Rik
7.78498	-0.21583	1.71238	-0.126041	0.899699	0.995542	9330162012Rik
5.57861	3.54984	1.87798	1.89024	0.0587257	0.516955	9330179D12Rik
34.265	2.36124	0.931848	2.53393	0.011279	0.223162	9330182L06Rik
46.8922	0.970717	0.642166	1.51163	0.130628	0.71007	9430016H08Rik
73.0427	-0.113803	0.50023	-0.227502	0.820033	0.992824	9430020K01Rik
16.1373	1.06258	1.02006	1.04169	0.297558	0.892522	9430038I01Rik
9.25532	-0.138309	1.72256	-0.0802928	0.936004	0.995542	9430065F17Rik
13.5557	0.241545	1.13501	0.212813	0.831472	0.995113	9430083A17Rik
7.89898	3.75738	2.00982	1.86951	0.0615518	0.523058	9430091E24Rik
28.2456	2.03566	0.751295	2.70954	0.00673763	0.164093	9530059O14Rik
67.718	0.422319	0.491129	0.859895	0.389847	0.931365	9530068E07Rik
25.0192	1.26088	0.869059	1.45086	0.146819	0.734713	9530077C05Rik
8.03589	-1.0339	2.1337	-0.484556	0.627991	0.985263	9530080O11Rik
6.71656	2.47045	1.68223	1.46855	0.141955	0.728518	9530082P21Rik
23.6779	0.682412	1.18448	0.576128	0.564529	0.9788	9530091C08Rik
18.6452	0.432413	0.982759	0.439999	0.659938	0.98579	9630013A20Rik
13.0464	-0.442854	1.37527	-0.322012	0.747444	0.989837	9830147E19Rik
5.41164	-5.83604	2.26013	-2.58217	0.00981818		9830166K06Rik
187.557	0.347195	0.343092	1.01196	0.311557	0.90081	9930021J03Rik
5.05189	-2.2752	2.07058	-1.09882	0.271845		9930104L06Rik
37.553	0.882956	0.888705	0.993531	0.320451	0.90511	A130010J15Rik
6.29941	0.464908	2.19764	0.211549	0.832459	0.995113	A230009B12Rik
119.419	0.383414	0.375603	1.02079	0.307352	0.897188	A230046K03Rik
11.3863	-1.0554	1.30996	-0.805675	0.42043	0.94223	A230050P20Rik
6.89665	0.655537	1.61742	0.405298	0.685258	0.98579	A230056P14Rik
12.6438	0.786329	1.57386	0.499619	0.617344	0.985187	A230057D06Rik
9.9046	-0.0705448	1.55618	-0.0453319	0.963843	0.995542	A230065H16Rik
30.2962	-0.217811	0.729058	-0.298757	0.765126	0.991173	A230070E04Rik
16.6781	-1.08348	1.01717	-1.06519	0.286789	0.888289	A230072C01Rik
17.5859	1.84187	1.02075	1.80444	0.0711628	0.560898	A2m
12.2945	1.23059	1.35658	0.907125	0.364341	0.92361	A330009N23Rik
18.0149	-0.403039	0.910703	-0.442558	0.658085	0.98579	A330023F24Rik
15.1121	-0.987281	1.50486	-0.656061	0.511785	0.965609	A330048O09Rik
73.3097	-0.397256	0.596291	-0.666211	0.505276	0.964409	A330050F15Rik
53.2976	-0.0329138	0.567505	-0.0579974	0.953751	0.995542	A330069E16Rik
13.0828	1.5961	1.52291	1.04806	0.294613	0.889939	A330070K13Rik
97.7957	0.353261	0.416228	0.848719	0.396038	0.934371	A330076H08Rik
10.8411	3.40646	1.68608	2.02035	0.0433474	0.451959	A330102I10Rik
145.763	-0.282909	0.355898	-0.794916	0.426663	0.945062	A430005L14Rik
19.6468	0.841905	1.10655	0.760834	0.446756	0.949273	A430033K04Rik
16.2475	0.168928	1.53139	0.11031	0.912163	0.995542	A430035B10Rik
15.9739	-0.123945	1.09353	-0.113344	0.909758	0.995542	A430046D13Rik
24.2341	-0.363856	1.22422	-0.297215	0.766303	0.991173	A530058N18Rik
10.6166	-1.28771	3.74622	-0.343735	0.731045	0.988338	A630066F11Rik
12.4179	-0.698053	1.28453	-0.543433	0.586832	0.980495	A630072M18Rik
12.7273	0.178995	1.07566	0.166404	0.867839	0.995542	A630089N07Rik
140.186	-0.869776	0.360654	-2.41166	0.0158801	0.272243	A730017C20Rik
8.80397	-0.93225	1.56615	-0.595249	0.551677	0.976197	A730017L22Rik
23.0274	0.263419	0.898203	0.293273	0.769314	0.991402	A730020E08Rik
13.3973	-1.33355	1.33349	-1.00005	0.317288	0.903352	A730056A06Rik
400.263	0.0479801	0.225231	0.213026	0.831306	0.995113	A830010M20Rik
212.839	-0.246287	0.310103	-0.794209	0.427074	0.945062	A830018L16Rik
40.1007	-0.824572	0.692011	-1.19156	0.233434	0.855532	A830080D01Rik
20.5598	0.775985	1.13373	0.684456	0.493687	0.96129	A830082K12Rik
53.0822	1.03793	0.67546	1.53663	0.124383	0.698793	A830082N09Rik
8.7736	-6.53077	2.18205	-2.99295	0.00276292	0.0962704	A930004D18Rik
75.1746	-0.504041	0.453629	-1.11113	0.266512	0.882585	A930005H10Rik
7.18763	1.04697	1.72879	0.605609	0.544775	0.973359	A930012L18Rik
17.3113	0.847064	1.3101	0.646566	0.517913	0.966856	A930013F10Rik
6.17783	-2.82159	2.06121	-1.3689	0.171031	0.777905	A930017M01Rik
10.5287	-0.958796	1.45686	-0.658125	0.510458	0.965262	A930024E05Rik
5.42178	-5.83892	2.18457	-2.6728	0.00752216		AA387883
13.4803	0.588952	1.20828	0.487429	0.625955	0.985263	AA388235
10.6392	-0.870671	1.49298	-0.583176	0.559775	0.977835	AA414768
18.1408	-1.87697	1.04182	-1.80162	0.0716055	0.561827	Aaas
25.7736	-1.28148	0.815013	-1.57234	0.115872	0.679313	Aacs
78.5896	-0.426289	0.489819	-0.870299	0.384137	0.930603	Aagab
391.207	-0.43237	0.227031	-1.90446	0.0568504	0.512311	Aak1
236.781	0.141229	0.289784	0.48736	0.626003	0.985263	Aamdc
311.423	0.172503	0.256547	0.672401	0.501328	0.964142	Aamp
41.3719	-0.730131	0.710237	-1.02801	0.303944	0.895679	Aar2
12.7978	2.07246	1.51497	1.36799	0.171315	0.778595	Aard
143.685	0.0132604	0.451902	0.0293436	0.976591	0.997641	Aars
19.7512	-0.366983	1.00114	-0.366564	0.713944	0.985965	Aars2
96.7475	0.674967	0.4122	1.63747	0.101531	0.64329	Aarsd1
16.4618	0.0526187	1.01175	0.0520076	0.958523	0.995542	Aasdh
145.225	-0.196156	0.405024	-0.484307	0.628168	0.985263	Aasdhppt
15.5655	0.512937	1.14892	0.44645	0.655272	0.98579	Aatf
24.8605	0.947871	0.918092	1.03244	0.301868	0.894969	Aatk
368.477	-0.260194	0.245078	-1.06168	0.288381	0.888289	Abat
72.6064	0.273736	0.479895	0.570408	0.568401	0.9788	Abca1
115.347	0.0476021	0.379991	0.125272	0.900308	0.995542	Abca2
51.2957	-0.433953	0.573205	-0.757064	0.449011	0.949273	Abca3
173.53	0.264268	0.370735	0.712823	0.475956	0.954845	Abca5
30.7333	-0.854256	1.02959	-0.829707	0.406705	0.939239	Abca8a
23.6589	-0.154658	0.857726	-0.180312	0.856908	0.995542	Abca8b
27.0897	1.23244	0.884604	1.39321	0.163555	0.766633	Abca9
35.1664	1.3411	0.978213	1.37097	0.170385	0.776759	Abcb10
22.2048	-0.561662	1.01333	-0.554274	0.579391	0.979539	Abcb1a
13.7843	-0.726581	1.03848	-0.69966	0.48414	0.957634	Abcb1b
7.25362	0.309114	1.59516	0.193783	0.846346	0.995542	Abcb4
17.2041	0.362131	1.50452	0.240696	0.809791	0.992395	Abcb6
76.9215	0.210821	0.558407	0.377539	0.705773	0.985965	Abcb7
36.9164	-0.354161	0.902977	-0.392215	0.694899	0.98579	Abcb8
17.2636	0.416742	1.3583	0.306813	0.758986	0.990738	Abcb9
27.4488	-0.665387	0.976391	-0.681477	0.49557	0.961984	Abcc1
145.468	0.706861	0.392384	1.80145	0.0716315	0.561827	Abcc5
26.3966	-0.065484	0.919976	-0.0711801	0.943254	0.995542	Abcc8
5.50417	0.107978	2.31826	0.046577	0.96285		Abcc9
67.9439	-0.161204	0.534833	-0.301411	0.763101	0.991173	Abcd2
100.885	0.445215	0.455386	0.977665	0.32824	0.907536	Abcd3
10.4021	-0.167721	1.5981	-0.10495	0.916415	0.995542	Abcd4
236.859	-0.0713185	0.300391	-0.237419	0.812332	0.992395	Abce1
169.364	-0.104469	0.349959	-0.298516	0.765309	0.991173	Abcf1
132.517	-1.08588	0.401616	-2.70379	0.00685541	0.165105	Abcf2
83.1421	-0.171805	0.57086	-0.300958	0.763446	0.991173	Abcf3
118.772	-0.0110546	0.384921	-0.0287191	0.977089	0.997641	Abcg1
55.2115	0.28653	0.545155	0.525594	0.599171	0.983211	Abcg2
17.6362	0.0627253	0.983423	0.0637826	0.949143	0.995542	Abcg4
7.79134	0.484417	1.82325	0.265688	0.790479	0.992395	Abhd1
69.6532	-0.530623	0.509185	-1.0421	0.297364	0.892167	Abhd10
27.4582	-0.768389	0.886227	-0.867034	0.385923	0.930976	Abhd11
362.018	-0.275348	0.243084	-1.13273	0.257328	0.879296	Abhd12
79.2251	0.382832	0.609212	0.628406	0.529738	0.96948	Abhd13
36.3167	-1.07084	0.720664	-1.48591	0.137303	0.718575	Abhd14a
12.3503	-0.170216	1.34521	-0.126535	0.899309	0.995542	Abhd14b
7.66908	0.826641	2.14923	0.384623	0.700517	0.985813	Abhd15
96.655	0.339328	0.472394	0.718316	0.472563	0.954845	Abhd16a
361.426	-0.731638	0.283987	-2.57631	0.00998603	0.207147	Abhd17a
141.32	0.331921	0.396995	0.836084	0.403108	0.938413	Abhd17b
51.3776	0.855863	0.577083	1.48309	0.138052	0.720855	Abhd17c
6.93451	0.129748	1.91303	0.0678232	0.945926	0.995542	Abhd2
90.7189	-0.140727	0.445816	-0.315662	0.752259	0.989837	Abhd3
46.9549	-0.717425	0.864381	-0.829987	0.406546	0.939239	Abhd4
29.9059	0.596192	0.795176	0.749761	0.453399	0.949273	Abhd5
215.696	0.116964	0.299509	0.39052	0.696152	0.98579	Abhd6
86.119	0.429842	0.481232	0.89321	0.371745	0.925962	Abhd8
347.293	0.174221	0.23729	0.734211	0.46282	0.953951	Abi1
552.222	0.0591234	0.222792	0.265375	0.79072	0.992395	Abi2
21.5465	-0.499017	0.878153	-0.568258	0.56986	0.9788	Abl1
135.125	0.499636	0.427998	1.16738	0.243056	0.863713	Abl2
93.4125	-0.213266	0.480278	-0.444046	0.657009	0.98579	Ablim1
24.5434	0.185828	0.79063	0.235037	0.81418	0.992395	Ablim2
4.45539	-2.007	2.53467	-0.79182	0.428466		Ablim3
319.237	0.0580164	0.280781	0.206625	0.836303	0.995113	Abr
132.407	0.430698	0.410792	1.04846	0.294428	0.889939	Abracl
32.4383	0.344386	1.01199	0.340306	0.733626	0.988698	Abt1
11.9815	-0.177731	1.18259	-0.15029	0.880536	0.995542	Abtb1
30.8619	1.66034	1.00163	1.65764	0.0973897	0.635258	Acaa1a
64.551	0.488602	0.657331	0.743311	0.457293	0.950696	Acaa2
55.436	0.409144	0.615289	0.664963	0.506074	0.964409	Acaca
11.4365	0.1069	1.33475	0.0800902	0.936165	0.995542	Acad11
15.6892	1.50316	1.03942	1.44615	0.148135	0.736944	Acad8
61.3676	0.400629	0.600703	0.666934	0.504814	0.964142	Acad9
81.9168	1.27605	0.538364	2.37024	0.0177766	0.290023	Acadl
101.991	-0.550915	0.418969	-1.31493	0.188533	0.805117	Acadm
122.666	0.141765	0.414636	0.341903	0.732424	0.988482	Acadsb
59.6496	-0.140372	0.584741	-0.240059	0.810284	0.992395	Acadvl
234.973	-0.330244	0.312639	-1.05631	0.290827	0.888648	Acap2
54.7354	-0.0926175	0.6306	-0.146872	0.883233	0.995542	Acap3
340.261	-0.0300086	0.250567	-0.119763	0.904671	0.995542	Acat1
44.9703	0.865774	0.707105	1.22439	0.220804	0.84025	Acat2
151.497	-0.126928	0.388393	-0.326802	0.743817	0.989837	Acbd3
19.7349	0.0445614	0.984856	0.0452466	0.963911	0.995542	Acbd4
227.779	0.336444	0.277282	1.21336	0.224991	0.845022	Acbd5
107.366	-0.228529	0.45231	-0.505248	0.613385	0.985187	Acbd6
6.01894	1.16591	2.20625	0.528457	0.597182	0.982811	Acbd7
31.778	-2.76613	0.947293	-2.92004	0.00349987	0.109948	Acd
6.62517	5.32016	2.23172	2.38388	0.0171312	0.28265	Ace
5.61378	-2.41768	1.92164	-1.25813	0.208343	0.829628	Acer2
36.2069	-0.115749	0.772777	-0.149783	0.880936	0.995542	Acer3
180.142	0.0924437	0.375951	0.245893	0.805765	0.992395	Acin1
41.1086	-1.49099	0.738145	-2.01992	0.0433916	0.451959	Ackr1
19.9779	1.04442	1.22675	0.85137	0.394564	0.934173	Ackr3
91.8589	0.851768	0.435079	1.95773	0.0502614	0.48623	Acly
43.3462	-0.533953	0.636507	-0.83888	0.401537	0.936232	Aco1
522.709	-0.155644	0.188003	-0.82788	0.407739	0.939239	Aco2
24.2097	-1.00683	0.889524	-1.13187	0.257687	0.879472	Acot1
20.6588	0.774468	1.05647	0.733072	0.463515	0.954042	Acot11
759.782	-0.240528	0.169103	-1.42237	0.154919	0.752951	Acot13
75.2792	0.966423	0.568872	1.69884	0.0893492	0.612888	Acot2
8.40894	-0.627528	1.79078	-0.350421	0.726023	0.986629	Acot5
406.144	-0.332725	0.218751	-1.52102	0.128254	0.706099	Acot7
10.6537	1.7485	1.46922	1.19009	0.234012	0.856537	Acot8
49.4626	0.537346	0.610429	0.880275	0.37871	0.925962	Acot9
208.781	-0.323834	0.327359	-0.989233	0.322549	0.906822	Acox1
9.84655	3.08697	1.42092	2.17251	0.0298172	0.378711	Acox3
142.001	-0.331415	0.36494	-0.908135	0.363807	0.923125	Acp1
78.8779	-0.119508	0.516348	-0.231448	0.816967	0.992395	Acp2
14.3356	-0.452655	1.46265	-0.309476	0.75696	0.990715	Acp6
93.2215	0.0920503	0.492066	0.187069	0.851606	0.995542	Acsbg1
17.9383	-0.62516	1.31125	-0.476766	0.633529	0.985263	Acsf3
66.4327	0.0238236	0.519187	0.0458863	0.963401	0.995542	Acsl1
590.823	-0.0451372	0.224028	-0.20148	0.840323	0.995488	Acsl3
516.783	0.416532	0.247417	1.68352	0.0922739	0.623179	Acsl4
43.0978	-1.43525	0.638655	-2.24731	0.0246205	0.342139	Acsl5
243.342	0.08422	0.354024	0.237894	0.811963	0.992395	Acsl6
6.95058	-2.68554	1.95818	-1.37145	0.170235	0.776675	Acss1
38.6445	-0.695478	0.629631	-1.10458	0.269341	0.884332	Acss2
42.7838	-0.411804	1.01852	-0.404316	0.685981	0.98579	Acta1
8.86457	-0.960642	2.01786	-0.47607	0.634025	0.985263	Acta2
19345	0.960353	0.503994	1.90548	0.0567173	0.512311	Actb
94.1371	0.425102	0.467344	0.909612	0.363027	0.922158	Actg1
51.5171	-0.387088	0.622723	-0.621606	0.534201	0.970761	Actl6a
136.914	0.123471	0.373222	0.330823	0.740778	0.989837	Actl6b
61.9882	-0.28704	0.625732	-0.458727	0.64643	0.985263	Actn1
6.35089	-4.16588	1.90775	-2.18366	0.0289873	0.370962	Actn2
106.209	0.377829	0.446486	0.846229	0.397425	0.934371	Actn4
238.956	0.307137	0.281937	1.08938	0.275985	0.888289	Actr10
112.954	-1.00125	0.431998	-2.31771	0.0204649	0.311911	Actr1a
89.0467	-0.460584	0.464673	-0.991201	0.321587	0.906822	Actr1b
1572.68	0.735815	0.165308	4.45117	8.5402e-06	0.00123021	Actr2
319.091	0.400993	0.242583	1.65301	0.0983282	0.637272	Actr3
27.7902	-0.78085	0.813677	-0.959656	0.337228	0.911729	Actr3b
6.18349	0.804666	2.19923	0.365886	0.71445	0.985965	Actr5
182.66	-0.0746103	0.331935	-0.224773	0.822156	0.992853	Actr6
75.8759	-0.0664273	0.571657	-0.116201	0.907493	0.995542	Actr8
35.5848	2.05787	0.900345	2.28565	0.022275	0.32509	Acvr1
6.5173	3.33712	1.90993	1.74725	0.0805943	0.587069	Acvr1b
114.891	0.749459	0.510574	1.46788	0.142138	0.728518	Acvr1c
180.052	0.127954	0.312743	0.409136	0.68244	0.98579	Acvr2a
20.8707	0.473704	1.2638	0.374826	0.70779	0.985965	Acvr2b
7.29899	1.22709	2.11409	0.580435	0.561622	0.978238	Acy1
81.644	-0.0389919	0.463871	-0.0840577	0.933011	0.995542	Acyp1
133.14	-0.107543	0.364098	-0.295368	0.767713	0.991173	Acyp2
32.7043	-0.538162	0.74943	-0.718096	0.472698	0.954845	Adal
651.564	1.10545	0.270235	4.09072	4.30042e-05	0.00468159	Adam10
49.0916	0.184105	0.642072	0.286736	0.774314	0.992096	Adam11
22.6654	0.162413	0.879053	0.184758	0.853418	0.995542	Adam15
15.3172	-0.408949	1.06839	-0.382773	0.701888	0.985813	Adam17
7.77904	3.54939	1.7387	2.0414	0.0412108	0.441726	Adam19
243.117	0.439669	0.301139	1.46002	0.144285	0.730203	Adam22
232.039	0.910565	0.30354	2.99982	0.00270143	0.0949682	Adam23
37.3749	0.612092	0.784013	0.780716	0.43497	0.946456	Adam9
16.8256	2.08023	1.14326	1.81956	0.0688263	0.550552	Adamts1
8.32444	-2.35829	1.68116	-1.40278	0.160684	0.759996	Adamts13
5.53648	2.85574	2.23738	1.27638	0.201822	0.820584	Adamts2
22.1189	-0.105808	1.21394	-0.0871608	0.930544	0.995542	Adamts20
13.98	0.341562	1.20374	0.28375	0.776602	0.992299	Adamts3
5.37	1.5974	2.10758	0.757933	0.448491		Adamts9
28.9192	0.372232	0.85223	0.436774	0.662276	0.98579	Adamtsl1
5.68215	2.53823	2.23483	1.13576	0.256056	0.878322	Adamtsl4
63.6144	-0.0383246	0.628115	-0.0610152	0.951347	0.995542	Adap1
12.7522	-0.666946	1.15733	-0.576281	0.564425	0.9788	Adap2
59.1136	-1.24118	0.681472	-1.82133	0.0685568	0.550552	Adar
100.61	0.122325	0.440894	0.277448	0.781436	0.992395	Adarb1
22.5526	-2.3647	1.15438	-2.04845	0.0405158	0.438656	Adarb2
9.86415	-0.919349	1.6068	-0.572162	0.567212	0.9788	Adat2
33.416	-0.222183	0.742511	-0.299232	0.764763	0.991173	Adck1
48.693	0.0755456	0.782137	0.0965887	0.923053	0.995542	Adck3
15.7792	0.988246	1.21503	0.813354	0.416015	0.940113	Adck4
5.36011	0.762493	2.3019	0.331245	0.740459		Adck5
557.083	-0.207041	0.19684	-1.05182	0.292881	0.888648	Adcy1
98.5608	-1.04952	0.49581	-2.11677	0.0342792	0.405717	Adcy2
71.5731	-0.581903	0.59007	-0.98616	0.324054	0.906822	Adcy3
25.8284	0.690521	0.794209	0.869444	0.384604	0.930676	Adcy5
9.87637	1.42824	1.3867	1.02996	0.30303	0.895679	Adcy8
127.162	-0.13847	0.369744	-0.374503	0.70803	0.985965	Adcy9
16.8984	1.32077	1.27852	1.03305	0.301582	0.894969	Adcyap1
72.1984	-0.729645	0.526477	-1.3859	0.165777	0.771497	Adcyap1r1
511.932	-0.13739	0.182839	-0.751429	0.452395	0.949273	Add1
218.367	-0.30649	0.287507	-1.06603	0.286411	0.888289	Add2
443.901	0.556777	0.218308	2.55042	0.0107594	0.216137	Add3
189.894	-0.684381	0.316679	-2.16112	0.030686	0.384373	Adgra1
21.8674	-0.0801546	0.999944	-0.0801591	0.936111	0.995542	Adgra2
86.6948	-0.472803	0.442696	-1.06801	0.285518	0.888289	Adgrb1
118.214	0.323053	0.393148	0.82171	0.411242	0.939772	Adgrb2
160.104	-0.191609	0.386428	-0.495847	0.620003	0.985187	Adgrb3
13.5591	-0.0472956	1.59895	-0.0295792	0.976403	0.997641	Adgre1
7.63582	-2.96431	2.04245	-1.45135	0.146683	0.734713	Adgre5
5.78596	0.119469	2.55975	0.0466722	0.962774	0.995542	Adgrf4
6.62884	-1.8069	1.98573	-0.90994	0.362854	0.922158	Adgrf5
50.2294	-0.44379	0.621042	-0.714589	0.474863	0.954845	Adgrg1
8.06529	-4.41446	1.7961	-2.4578	0.013979	0.254423	Adgrg2
222.331	0.536202	0.326657	1.64148	0.100697	0.642659	Adgrl1
62.3862	0.513549	0.582478	0.881662	0.37796	0.925962	Adgrl2
91.2324	-0.0941247	0.448109	-0.210049	0.83363	0.995113	Adgrl3
4.96716	1.8606	2.14958	0.865562	0.38673		Adgrl4
8.43754	-1.4526	2.02998	-0.715572	0.474256	0.954845	Adgrv1
122.722	0.823211	0.415018	1.98356	0.0473054	0.472825	Adh5
51.8848	1.6513	0.711455	2.32102	0.0202856	0.310783	Adhfe1
38.5475	0.0706354	0.680631	0.103779	0.917344	0.995542	Adi1
184.637	0.169352	0.363325	0.466118	0.641131	0.985263	Adipor1
111.959	0.422847	0.405545	1.04266	0.297104	0.891855	Adipor2
173.296	-0.174343	0.316267	-0.551251	0.581461	0.979539	Adk
17.6858	-0.212934	1.04648	-0.203477	0.838762	0.995488	Adnp2
139.844	-0.027623	0.379519	-0.0727844	0.941978	0.995542	Ado
124.2	-0.127499	0.417799	-0.305168	0.760239	0.991173	Adora1
6.55479	0.540025	1.90412	0.283609	0.77671	0.992299	Adora2b
12.0989	-0.593382	1.15008	-0.515948	0.605891	0.984562	Adpgk
131.045	0.204434	0.363425	0.562519	0.573763	0.9788	Adprh
19.0401	-0.359307	0.959882	-0.374324	0.708163	0.985965	Adprm
10.5813	-0.29139	1.2092	-0.240978	0.809572	0.992395	Adra1d
16.1795	1.66797	1.46992	1.13474	0.256485	0.878322	Adra2a
11.0873	-0.242856	1.63656	-0.148394	0.882032	0.995542	Adra2c
19.4392	0.0370897	1.01543	0.0365263	0.970863	0.996859	Adrb1
85.2627	-0.404914	0.628436	-0.64432	0.519368	0.966856	Adrbk1
157.206	-0.5027	0.40724	-1.23441	0.217051	0.835931	Adrbk2
52.4097	-0.649359	0.687329	-0.944757	0.344783	0.915598	Adrm1
33.4798	-1.25748	0.782515	-1.60697	0.10806	0.658282	Adsl
159.802	-0.27747	0.351048	-0.790405	0.429291	0.945451	Adss
40.0916	-0.0728624	0.686265	-0.106172	0.915446	0.995542	Adssl1
30.5408	0.00122299	1.001	0.00122176	0.999025	0.999735	Aebp1
121.351	0.248279	0.401263	0.618744	0.536085	0.97117	Aebp2
1046.23	-0.851461	0.158929	-5.35749	8.4388e-08	1.91691e-05	Aes
24.716	1.34596	0.982426	1.37003	0.170676	0.77719	AF251705
11.5782	0.298963	1.15841	0.258082	0.796344	0.992395	AF357359
13.9517	1.48893	1.4155	1.05188	0.292856	0.888648	AF357425
36.5607	-0.756896	0.678444	-1.11564	0.264578	0.881831	Afap1
11.1475	-0.100963	1.46167	-0.0690739	0.944931	0.995542	Afap1l1
13.7706	-1.43808	1.34247	-1.07122	0.28407	0.888289	Aff1
24.9788	0.112726	1.00067	0.11265	0.910308	0.995542	Aff2
57.0182	0.242757	0.54784	0.443117	0.657681	0.98579	Aff3
399.597	0.202517	0.241104	0.839954	0.400934	0.935935	Aff4
17.67	-0.189879	0.97183	-0.195383	0.845093	0.995542	Afg3l1
96.2242	0.0983562	0.419015	0.234732	0.814417	0.992395	Afg3l2
209.341	0.373686	0.303158	1.23264	0.217709	0.836558	Aftph
33.0669	0.118285	0.852657	0.138726	0.889667	0.995542	Aga
134.032	-0.0745453	0.419658	-0.177633	0.859011	0.995542	Agap1
139.578	0.748764	0.394189	1.8995	0.0574981	0.512579	Agap2
56.9635	-0.086178	0.612851	-0.140618	0.888172	0.995542	Agap3
20.0654	0.386819	1.18891	0.325356	0.744912	0.989837	Agbl3
15.7038	-0.535237	1.02532	-0.522021	0.601656	0.984071	Agbl4
86.2383	-0.340947	0.514556	-0.662603	0.507585	0.964641	Agfg1
160.343	0.128839	0.409912	0.314308	0.753287	0.989837	Agfg2
148.703	0.228657	0.398958	0.573134	0.566554	0.9788	Aggf1
49.1548	-0.378159	0.660227	-0.572771	0.5668	0.9788	Agk
57.2227	-0.142204	0.549049	-0.259001	0.795634	0.992395	Agl
6.29573	2.18981	1.71178	1.27926	0.200804	0.819875	Agmo
52.4326	0.21671	0.684992	0.316369	0.751722	0.989837	Ago1
64.1871	-0.178765	0.574638	-0.311092	0.755731	0.989985	Ago2
60.7471	-0.0413736	0.549207	-0.0753333	0.93995	0.995542	Ago3
16.793	0.46269	1.52134	0.304133	0.761027	0.991173	Ago4
104.63	1.21017	0.459608	2.63305	0.00846229	0.186486	Agpat1
139.552	0.021473	0.3857	0.0556729	0.955602	0.995542	Agpat3
52.3873	0.0929564	0.710608	0.130812	0.895924	0.995542	Agpat4
306.142	-0.515247	0.315243	-1.63445	0.102165	0.64329	Agpat5
86.1127	-0.25796	0.446862	-0.57727	0.563757	0.9788	Agpat6
4.65718	4.80986	2.57685	1.86657	0.0619623		Agpat9
72.8896	1.01995	0.464027	2.19805	0.0279456	0.363911	Agps
26.8548	0.54153	0.804355	0.673248	0.50079	0.964142	Agrn
25.3186	0.168915	0.91795	0.184014	0.854003	0.995542	Agt
413.049	-0.233835	0.237347	-0.985207	0.324522	0.906822	Agtpbp1
16.9721	0.88873	1.10479	0.804431	0.421148	0.94223	Agtrap
106.034	-0.0574073	0.406859	-0.141099	0.887792	0.995542	Ahctf1
8.86435	0.33253	1.52251	0.218409	0.82711	0.995113	Ahcy
508.712	0.190611	0.187704	1.01548	0.309876	0.898442	Ahcyl1
221.557	0.198917	0.302322	0.657963	0.510562	0.965262	Ahcyl2
10.9131	-0.407281	1.2049	-0.338022	0.735347	0.988848	Ahdc1
1335.84	-0.159534	0.138721	-1.15003	0.25013	0.87309	Ahi1
25.6231	1.33264	0.864656	1.54124	0.123259	0.696107	Ahnak
9.281	-0.355259	1.38366	-0.256753	0.79737	0.992395	Ahr
26.7452	-0.891143	0.918144	-0.970591	0.331752	0.909209	Ahsa1
51.6924	0.212452	0.68144	0.311769	0.755216	0.989938	Ahsa2
12.884	-0.789581	1.37297	-0.57509	0.56523	0.9788	AI115009
201.918	0.308719	0.324969	0.949995	0.342115	0.914804	AI314180
438.522	-0.540986	0.25476	-2.12351	0.033711	0.403619	AI413582
24.1219	0.303806	0.875559	0.346985	0.728602	0.986974	AI414108
9.61869	0.30699	1.61606	0.189962	0.849339	0.995542	AI464131
82.8085	-0.169241	0.538989	-0.313997	0.753523	0.989837	AI504432
577.166	0.48535	0.235554	2.06047	0.0393541	0.432543	AI593442
39.9358	-0.359372	0.967631	-0.371394	0.710344	0.985965	AI597479
6.74907	6.3457	2.3566	2.69274	0.00708674	0.167202	AI607873
35.9228	0.818622	0.685409	1.19436	0.232339	0.854684	AI837181
12.6559	-1.16881	1.18946	-0.982636	0.325786	0.906984	AI846148
31.3903	-0.78232	0.996282	-0.785239	0.432314	0.945451	AI854517
18.6754	-1.64564	1.13663	-1.44783	0.147666	0.736292	AI854703
44.0433	0.2929	0.628201	0.466253	0.641035	0.985263	AI987944
67.6603	0.376254	0.57434	0.655106	0.512399	0.965959	Aida
143.354	1.85721	0.474011	3.91807	8.9261e-05	0.00827634	Aif1
18.822	0.330111	1.20836	0.273188	0.784708	0.992395	Aif1l
90.4924	-0.659651	0.448719	-1.47008	0.141541	0.7273	Aifm1
15.6496	-0.367171	1.51433	-0.242464	0.808421	0.992395	Aifm2
42.5863	-0.0826029	0.901552	-0.091623	0.926998	0.995542	Aifm3
76.5903	-0.192605	0.519357	-0.370853	0.710747	0.985965	Aig1
11.3036	0.791832	1.34725	0.58774	0.556707	0.977334	Aim2
192.634	-0.463108	0.363955	-1.27243	0.203219	0.821783	Aimp1
88.5585	0.218477	0.458525	0.476478	0.633734	0.985263	Aimp2
168.05	-0.476919	0.355026	-1.34334	0.179163	0.78779	Aip
78.1866	-0.0610514	0.61352	-0.09951	0.920733	0.995542	Ajap1
28.0762	-1.19656	0.872993	-1.37064	0.170486	0.77692	AK010878
152.163	-0.366487	0.374799	-0.977823	0.328162	0.907536	Ak1
67.5129	-0.548837	0.552224	-0.993867	0.320288	0.90511	Ak2
86.0824	0.043205	0.459053	0.0941178	0.925016	0.995542	Ak3
50.1078	-0.16476	0.655856	-0.251213	0.801649	0.992395	Ak4
432.404	-0.443194	0.245468	-1.80551	0.0709956	0.560366	Ak5
58.5253	0.866161	0.637768	1.35811	0.174428	0.783231	Ak6
43.9134	1.25744	0.637811	1.97149	0.0486674	0.478254	Akap1
30.9835	-0.366013	0.722797	-0.506385	0.612587	0.985187	Akap10
915.792	-0.00672019	0.155537	-0.0432063	0.965537	0.995542	Akap11
74.5937	0.794027	0.549848	1.44409	0.148715	0.737569	Akap12
48.7413	-0.442483	0.799001	-0.553796	0.579718	0.979539	Akap13
70.9211	-0.247683	0.615391	-0.40248	0.68733	0.98579	Akap17b
116.483	-0.421074	0.442135	-0.952365	0.340912	0.914353	Akap5
514.18	0.0121787	0.222729	0.0546798	0.956394	0.995542	Akap6
106.758	-0.46109	0.401657	-1.14797	0.250981	0.873994	Akap7
53.7323	0.929976	0.654469	1.42096	0.155327	0.753343	Akap8
82.6154	-0.978155	0.547457	-1.78672	0.0739821	0.569401	Akap8l
379.016	0.0703308	0.247494	0.284172	0.776279	0.992299	Akap9
32.284	0.021465	0.858423	0.0250052	0.980051	0.997724	Akip1
206.294	-0.225502	0.32957	-0.684232	0.493829	0.96129	Akirin1
110.067	-0.17531	0.432652	-0.405198	0.685332	0.98579	Akirin2
515.185	0.0932355	0.211115	0.441633	0.658755	0.98579	Akr1a1
75.1658	0.271573	0.598672	0.453625	0.650099	0.98579	Akr1b10
12.7628	-1.45342	1.33892	-1.08551	0.277694	0.888289	Akr1c18
108.507	-0.486849	0.520146	-0.935986	0.34928	0.916439	Akr1e1
23.6941	0.604237	0.883765	0.683708	0.494159	0.961487	Akr7a5
59.8254	-0.730854	0.613254	-1.19176	0.233354	0.855532	Akt1
12.6019	-0.212938	1.63615	-0.130145	0.896451	0.995542	Akt1s1
34.9994	-0.091036	0.718437	-0.126714	0.899167	0.995542	Akt2
161.309	-0.0991315	0.382365	-0.259259	0.795436	0.992395	Akt3
373.312	-0.0769058	0.237561	-0.323731	0.746142	0.989837	Aktip
54.0075	0.850973	0.70565	1.20594	0.22784	0.849779	Alad
72.3469	-0.047287	0.53537	-0.0883258	0.929618	0.995542	Alas1
631.844	0.767699	0.205107	3.74292	0.000181892	0.0135981	Alcam
9.63118	-0.0666426	1.72162	-0.0387092	0.969122	0.996398	Aldh18a1
77.2368	0.0533981	0.52145	0.102403	0.918437	0.995542	Aldh1a1
12.2176	0.977867	3.5196	0.277835	0.781139	0.992395	Aldh1a2
56.9261	1.0572	0.664782	1.5903	0.111767	0.668454	Aldh1l1
21.4463	-0.125298	0.96987	-0.129191	0.897207	0.995542	Aldh2
24.1238	-0.523295	0.872555	-0.599727	0.548688	0.974864	Aldh3a2
9.56296	5.86173	2.04302	2.86914	0.00411587	0.121542	Aldh3b1
12.2458	-7.01406	1.82673	-3.83968	0.000123195	0.010176	Aldh3b2
9.8923	-0.230304	1.5347	-0.150065	0.880713	0.995542	Aldh4a1
38.6154	-0.302577	0.72212	-0.419012	0.675207	0.98579	Aldh5a1
74.1582	0.209269	0.51041	0.410001	0.681805	0.98579	Aldh6a1
95.9575	-0.33558	0.435646	-0.770303	0.44112	0.948227	Aldh7a1
47.9545	1.38939	0.680158	2.04275	0.0410775	0.440877	Aldh9a1
3750.68	-0.353941	0.0920259	-3.8461	0.000120012	0.00998301	Aldoa
1090.98	0.204323	0.194223	1.052	0.292798	0.888648	Aldoc
17.5772	-0.0745656	1.13685	-0.0655897	0.947705	0.995542	Alg1
7.47953	-0.12515	2.11824	-0.059082	0.952887	0.995542	Alg10b
78.8241	0.431873	0.460779	0.937267	0.348621	0.916439	Alg11
9.12761	-1.32449	1.56636	-0.845586	0.397784	0.934371	Alg13
43.048	-0.543431	0.638724	-0.850807	0.394876	0.934203	Alg14
96.9113	-1.29417	0.533839	-2.42427	0.0153394	0.268826	Alg2
13.9165	-2.2441	1.28203	-1.75043	0.0800435	0.585796	Alg3
53.6434	0.486316	0.908537	0.535274	0.592461	0.981624	Alg5
10.6354	-2.27538	1.39446	-1.63173	0.102735	0.644648	Alg6
24.2579	-2.94218	0.953747	-3.08487	0.00203644	0.0804496	Alg9
7.67053	-0.270255	1.67986	-0.16088	0.872188	0.995542	Alkbh2
23.8047	-0.256698	1.06299	-0.241488	0.809177	0.992395	Alkbh3
8.51607	-1.12669	2.01013	-0.560506	0.575134	0.9788	Alkbh4
328.745	1.27618	0.670287	1.90393	0.0569199	0.512311	Alkbh5
215.564	-1.03924	0.322057	-3.22689	0.00125144	0.0581967	Alkbh6
97.9444	-0.360574	0.4545	-0.793341	0.427579	0.945451	Alkbh7
47.1821	0.544553	0.687728	0.791815	0.428469	0.945451	Alkbh8
11.0654	0.713053	1.78743	0.398926	0.689948	0.98579	Alox12b
12.7166	-1.40204	1.47224	-0.952316	0.340937	0.914353	Alox5ap
6.00797	-1.06636	1.75144	-0.608848	0.542625	0.973031	Alox8
7.13494	0.734079	1.96494	0.373589	0.70871	0.985965	Aloxe3
5.45853	-3.79128	2.18074	-1.73853	0.0821179		Alpl
7.6909	-0.430305	1.56382	-0.275162	0.783192	0.992395	Als2
80.491	0.56429	0.473117	1.19271	0.232984	0.855532	Alyref
8.69781	1.681	1.53745	1.09337	0.274231	0.888223	Alyref2
52.8222	-0.496074	0.601718	-0.82443	0.409695	0.939772	Amacr
20.6084	0.709988	1.01902	0.696738	0.485967	0.958035	Ambra1
22.1262	0.104712	0.918363	0.114021	0.909221	0.995542	Amdhd2
13.3694	-1.44384	1.41411	-1.02102	0.307244	0.897188	Amer1
74.1322	-0.677104	0.556497	-1.21672	0.223709	0.843985	Amer2
30.4485	-0.862197	0.879115	-0.980756	0.326713	0.907509	Amer3
159.57	0.615754	0.40363	1.52554	0.127124	0.703285	Amfr
27.5683	0.27291	0.773288	0.352922	0.724147	0.986577	Amigo1
33.0063	0.0533822	0.995098	0.0536452	0.957218	0.995542	Amigo2
32.9013	1.2122	0.806449	1.50313	0.132805	0.710836	Ammecr1l
19.1918	0.246513	1.18094	0.208743	0.834649	0.995113	Amn
60.101	-0.252712	0.610321	-0.414064	0.678827	0.98579	Amn1
29.1622	0.190675	0.878794	0.216974	0.828229	0.995113	Amot
17.0112	1.14186	0.9652	1.18303	0.236796	0.858778	Amotl1
19.6574	-0.359873	0.880639	-0.408649	0.682797	0.98579	Amotl2
24.6374	0.477073	1.09293	0.436508	0.662468	0.98579	Ampd2
20.4584	0.937014	1.17703	0.796081	0.425985	0.944926	Ampd3
178.296	-0.134442	0.384622	-0.349544	0.726681	0.986884	Amph
5.942	-2.09989	1.72617	-1.21651	0.223792	0.843985	Amy1
69.8927	-0.159857	0.560709	-0.285099	0.775569	0.992096	Amz2
79.5166	-0.386032	0.623251	-0.619384	0.535664	0.97117	Anapc1
71.1563	-0.832935	0.523747	-1.59034	0.111759	0.668454	Anapc10
524.02	-0.884556	0.208204	-4.24851	2.15197e-05	0.00276294	Anapc11
340.998	0.083522	0.24072	0.346967	0.728616	0.986974	Anapc13
19.1513	0.403454	0.907651	0.444504	0.656679	0.98579	Anapc15
185.015	-0.222487	0.338777	-0.656736	0.511351	0.965455	Anapc16
102.6	0.467888	0.398788	1.17327	0.240686	0.860945	Anapc2
195.073	0.294663	0.334174	0.881763	0.377905	0.925962	Anapc4
85.9619	-0.203771	0.523876	-0.388969	0.697299	0.985813	Anapc5
43.1901	-0.742704	0.643678	-1.15384	0.248564	0.872186	Anapc7
15.5169	-0.0660045	1.1771	-0.0560738	0.955283	0.995542	Ang
158.834	-0.231903	0.345109	-0.671969	0.501603	0.964142	Angel2
58.0093	0.295393	0.561218	0.526343	0.59865	0.982811	Angpt1
34.8525	-1.29307	0.852835	-1.5162	0.129469	0.708334	Angptl6
217.513	-0.0283624	0.300872	-0.0942672	0.924897	0.995542	Ank
13.2634	-0.941682	1.19861	-0.785642	0.432077	0.945451	Ank1
470.879	0.374578	0.212234	1.76492	0.0775765	0.579056	Ank2
622.292	0.0511807	0.175836	0.291071	0.770997	0.991402	Ank3
65.7965	-0.173991	0.507351	-0.342941	0.731643	0.988482	Ankfy1
134.854	0.350329	0.423637	0.826957	0.408262	0.939239	Ankhd1
143.688	0.203614	0.362604	0.561532	0.574435	0.9788	Ankib1
71.9097	-0.0365348	0.488849	-0.0747364	0.940424	0.995542	Ankle2
72.2204	0.328552	0.481378	0.682525	0.494907	0.961487	Ankmy2
287.781	0.169755	0.274369	0.618709	0.536108	0.97117	Ankra2
47.0491	0.52742	0.625695	0.842934	0.399265	0.935061	Ankrd10
227.861	0.328512	0.336456	0.976387	0.328873	0.907536	Ankrd11
1014.95	-0.0325831	0.182835	-0.17821	0.858558	0.995542	Ankrd12
37.5896	0.182965	0.675834	0.270725	0.786602	0.992395	Ankrd13a
14.7606	-1.19747	1.31356	-0.911618	0.36197	0.922095	Ankrd13b
44.207	0.262232	0.601764	0.435773	0.663002	0.98579	Ankrd13c
20.2084	0.352693	1.2347	0.285652	0.775145	0.992096	Ankrd13d
16.6458	-0.276777	1.24198	-0.222851	0.823652	0.993457	Ankrd16
288.45	-0.160734	0.274966	-0.58456	0.558844	0.977835	Ankrd17
25.7714	-0.600552	1.12084	-0.535805	0.592093	0.981624	Ankrd24
74.6183	-0.147663	0.651142	-0.226775	0.820599	0.992824	Ankrd26
12.5953	1.38528	1.25429	1.10443	0.269407	0.884332	Ankrd27
49.4116	0.130277	0.654174	0.199148	0.842147	0.995488	Ankrd28
91.5315	0.192192	0.477104	0.402831	0.687073	0.98579	Ankrd29
90.2488	-0.211092	0.428833	-0.492246	0.622545	0.985187	Ankrd32
80.6722	0.801034	0.482166	1.66132	0.0966483	0.634112	Ankrd33b
53.9715	-1.70156	0.631506	-2.69445	0.00705046	0.167202	Ankrd34a
36.3147	-0.770885	0.675195	-1.14172	0.25357	0.876458	Ankrd34b
15.4611	-0.363014	1.34915	-0.269069	0.787877	0.992395	Ankrd35
31.6343	-0.128677	0.866588	-0.148487	0.881958	0.995542	Ankrd37
12.304	-0.766198	1.42279	-0.538519	0.590219	0.981288	Ankrd39
108.746	-0.625585	0.43825	-1.42746	0.153447	0.750214	Ankrd40
7.20917	0.201642	1.62596	0.124014	0.901304	0.995542	Ankrd42
30.6602	1.49238	0.729821	2.04486	0.0408687	0.440877	Ankrd44
79.6123	0.798997	0.533069	1.49886	0.13391	0.710836	Ankrd45
209.576	-0.352012	0.285914	-1.23118	0.218255	0.83703	Ankrd46
49.3462	-0.0396145	0.589308	-0.0672221	0.946405	0.995542	Ankrd49
36.9286	-0.860884	0.700085	-1.22968	0.218815	0.83754	Ankrd50
5.83212	-0.750635	1.84116	-0.407696	0.683497	0.98579	Ankrd54
6.95933	-3.50735	2.12373	-1.6515	0.0986355	0.637536	Ankrd55
28.532	-1.01446	0.999736	-1.01472	0.310238	0.898951	Ankrd6
14.0725	0.954608	1.2375	0.771403	0.440468	0.948034	Ankrd63
9.32541	-0.755398	1.34483	-0.561705	0.574317	0.9788	Ankrd9
13.3129	0.890688	1.18255	0.75319	0.451336	0.949273	Anks1
699.505	0.409392	0.180142	2.27261	0.0230499	0.33042	Anks1b
27.7791	-0.354894	0.78456	-0.452348	0.651018	0.98579	Anks3
8.39784	-0.603983	1.45307	-0.41566	0.677659	0.98579	Ankzf1
93.5899	-0.247886	0.441765	-0.561128	0.57471	0.9788	Anln
18.1377	-0.307162	1.21627	-0.252544	0.800621	0.992395	Ano10
6.94558	0.769228	1.6081	0.478344	0.632405	0.985263	Ano2
500.085	0.166835	0.222541	0.749683	0.453446	0.949273	Ano3
38.9189	0.00448255	0.713001	0.00628688	0.994984	0.998891	Ano4
38.7384	-0.177548	0.791286	-0.224379	0.822462	0.992853	Ano6
19.8975	-1.23709	1.05022	-1.17794	0.238821	0.860206	Ano8
343.685	0.148247	0.233717	0.6343	0.525885	0.968359	Anp32a
128.922	0.152828	0.44914	0.340267	0.733656	0.988698	Anp32b
73.6289	0.792354	0.679159	1.16667	0.243344	0.864475	Anp32e
10.8683	0.47907	1.44496	0.331544	0.740233	0.989837	Antxr1
28.9764	0.655188	1.04089	0.62945	0.529055	0.969466	Anxa2
64.1399	1.88257	1.55359	1.21175	0.225607	0.845295	Anxa3
8.88902	3.3095	1.70057	1.94611	0.0516413	0.494317	Anxa4
112.522	0.404815	0.401155	1.00912	0.312915	0.90166	Anxa5
73.5562	-0.135715	0.517323	-0.262341	0.793059	0.992395	Anxa6
129.23	-0.170494	0.371611	-0.458797	0.64638	0.985263	Anxa7
13.1915	-0.592553	1.34266	-0.441327	0.658976	0.98579	Aox3
5.69137	-0.560103	2.57163	-0.217801	0.827584	0.995113	Aox4
80.6272	0.116681	0.448256	0.2603	0.794632	0.992395	Ap1ar
132.817	-0.421809	0.390325	-1.08066	0.279848	0.888289	Ap1b1
181.53	0.331765	0.332569	0.997582	0.318482	0.90343	Ap1g1
91.7915	-1.4403	0.503414	-2.86107	0.0042221	0.123318	Ap1m1
420.559	-0.462749	0.282504	-1.63802	0.101417	0.64329	Ap1s1
126.273	0.0558613	0.392821	0.142206	0.886918	0.995542	Ap1s2
163.508	0.0356455	0.329768	0.108093	0.913922	0.995542	Ap2a1
861.274	0.833972	0.464143	1.7968	0.0723675	0.564898	Ap2a2
177.154	-0.329666	0.31618	-1.04265	0.297109	0.891855	Ap2b1
386.408	-0.256952	0.232227	-1.10647	0.268524	0.884251	Ap2m1
587.937	-0.550655	0.206847	-2.66214	0.00776466	0.175973	Ap2s1
97.2307	0.170386	0.492819	0.345738	0.72954	0.987702	Ap3b1
190.743	0.023327	0.332328	0.0701926	0.94404	0.995542	Ap3b2
213.822	-0.0401483	0.335555	-0.119647	0.904762	0.995542	Ap3d1
66.9909	-0.255386	0.580234	-0.440143	0.659834	0.98579	Ap3m1
152.74	-0.0314603	0.393982	-0.079852	0.936355	0.995542	Ap3m2
75.439	-0.409749	0.463604	-0.883834	0.376786	0.925962	Ap3s1
50.8751	0.442686	0.692148	0.639582	0.522444	0.966856	Ap3s2
12.4131	0.0764054	1.29135	0.0591672	0.952819	0.995542	Ap4b1
7.21187	1.31863	1.62434	0.811793	0.416911	0.941311	Ap4e1
201.903	-0.18204	0.3182	-0.572094	0.567258	0.9788	Ap4s1
22.3297	1.33376	1.11287	1.19848	0.230729	0.852914	Ap5m1
11.5512	0.643447	1.24428	0.517124	0.605069	0.984071	Ap5s1
9.81538	-1.84622	1.62691	-1.1348	0.256458	0.878322	Ap5z1
52.6858	0.373092	0.59692	0.625028	0.531953	0.970563	Apaf1
61.4891	0.203693	0.600721	0.33908	0.734549	0.988848	Apba1
210.774	0.0491466	0.356858	0.13772	0.890461	0.995542	Apba2
9.64714	-6.66903	1.8288	-3.64667	0.000265659	0.018244	Apba3
398.607	-0.194039	0.288355	-0.672915	0.501001	0.964142	Apbb1
24.0661	1.58256	0.877751	1.80297	0.0713936	0.56163	Apbb1ip
134.567	0.338544	0.394808	0.85749	0.391174	0.932174	Apbb2
39.1079	-0.0740947	0.72765	-0.101827	0.918894	0.995542	Apbb3
854.135	-0.108256	0.16116	-0.671726	0.501758	0.964142	Apc
19.7011	-0.287496	1.09696	-0.262083	0.793257	0.992395	Apc2
11.7516	-0.222564	1.26175	-0.176393	0.859985	0.995542	Apeh
124.766	0.0888545	0.383512	0.231687	0.816781	0.992395	Apex1
7.19212	0.25362	1.42294	0.178237	0.858537	0.995542	Apex2
8.81251	-0.849751	1.56393	-0.543344	0.586893	0.980495	Aph1a
59.0267	0.444731	0.59205	0.751171	0.45255	0.949273	Aph1b
8.99767	1.1605	1.37113	0.846381	0.39734	0.934371	Aph1c
187.141	-0.25357	0.304798	-0.831926	0.405451	0.939239	Api5
71.1964	-0.593855	0.504846	-1.17631	0.239471	0.860206	Apip
14.3147	-0.218099	1.33066	-0.163902	0.869808	0.995542	Apitd1
9.03027	0.791637	1.79419	0.441222	0.659052	0.98579	Aplf
10.0741	0.858909	1.68515	0.509693	0.610267	0.985187	Apln
1701.78	0.0263212	0.114815	0.229249	0.818676	0.992824	Aplp1
648.365	0.0668037	0.203254	0.328671	0.742404	0.989837	Aplp2
32.5477	-1.10327	0.811472	-1.35959	0.173959	0.783231	Apmap
4.62448	1.64191	2.182	0.752479	0.451763		Apoa1
179.248	-0.65	0.324381	-2.00382	0.0450896	0.462576	Apoa1bp
9.77523	0.184035	1.76085	0.104515	0.916761	0.995542	Apoa2
7.03783	1.615	2.11427	0.763855	0.444954	0.949273	Apobec3
8.31447	-1.01995	1.59243	-0.640497	0.52185	0.966856	Apoc1
6.06528	0.999741	1.97198	0.506974	0.612173	0.985187	Apoc3
604.974	0.524557	0.250283	2.09586	0.0360949	0.415144	Apod
5364.85	0.107074	0.0812007	1.31863	0.187293	0.803218	Apoe
12.9889	0.223808	1.18631	0.188659	0.85036	0.995542	Apold1
42.552	-0.0224408	0.630121	-0.0356134	0.971591	0.997083	Apoo
15.0639	-0.108836	1.00845	-0.107924	0.914056	0.995542	Apool
110.674	-0.0813973	0.385942	-0.210905	0.832961	0.995113	Apopt1
2982.05	0.576573	0.102047	5.65006	1.60389e-08	4.30573e-06	App
173.95	0.157166	0.328582	0.478314	0.632427	0.985263	Appbp2
433.293	0.13488	0.199428	0.676334	0.498828	0.964142	Appl1
85.6823	0.80797	0.458448	1.7624	0.0780015	0.580563	Appl2
201.922	-0.665168	0.404489	-1.64447	0.10008	0.640382	Aprt
53.726	0.744919	0.661607	1.12592	0.260198	0.881616	Aptx
56.7562	-0.854651	0.667403	-1.28056	0.200348	0.819428	Aqp11
535.407	0.953165	0.223005	4.2742	1.91828e-05	0.00248997	Aqp4
92.4478	-0.316734	0.451226	-0.701941	0.482716	0.957178	Aqr
148.258	-0.0698706	0.335598	-0.208197	0.835075	0.995113	Ar
174.296	-0.518316	0.322621	-1.60658	0.108147	0.658472	Araf
373.077	0.402514	0.219303	1.83543	0.0664425	0.542377	Arap2
57.3903	-0.522184	0.60327	-0.865589	0.386716	0.930976	Arc
185.491	-0.314194	0.468144	-0.671148	0.502126	0.964142	Arcn1
84.3777	-0.746435	0.599272	-1.24557	0.212923	0.833246	Arel1
528.241	-0.157201	0.190975	-0.823149	0.410423	0.939772	Arf1
51.8135	0.988491	0.622679	1.58748	0.112404	0.670226	Arf2
584.065	0.0728782	0.206105	0.353597	0.723641	0.986456	Arf3
216.609	0.0191213	0.308201	0.0620418	0.95053	0.995542	Arf4
400.623	0.0479898	0.222294	0.215885	0.829078	0.995113	Arf5
99.3876	0.70586	0.416074	1.69648	0.0897956	0.613786	Arf6
36.5373	-0.158018	0.770653	-0.205044	0.837538	0.995378	Arfgap1
26.653	0.395324	0.828595	0.477102	0.63329	0.985263	Arfgap2
39.8719	0.848628	1.01539	0.835764	0.403288	0.938462	Arfgap3
268.193	0.390172	0.323853	1.20478	0.228287	0.850386	Arfgef1
70.1156	-1.03442	0.536369	-1.92857	0.0537844	0.502969	Arfgef2
134.044	0.615249	0.359375	1.712	0.0868968	0.60556	Arfgef3
110.653	0.11683	0.421785	0.276988	0.781789	0.992395	Arfip1
65.3839	-0.226794	0.543519	-0.417269	0.676481	0.98579	Arfip2
42.5957	-0.302652	0.73147	-0.413758	0.679051	0.98579	Arfrp1
9.2892	1.04356	1.9745	0.528517	0.597141	0.982811	Arg2
570.576	1.1825	0.288643	4.09676	4.18967e-05	0.00462508	Arglu1
49.1369	-0.544034	0.619978	-0.877506	0.380212	0.927331	Arhgap1
33.8345	0.655876	0.988466	0.663529	0.506992	0.964409	Arhgap10
133.808	0.172989	0.374038	0.462489	0.64373	0.985263	Arhgap12
55.0746	0.799363	0.627977	1.27292	0.203047	0.821368	Arhgap15
12.0449	2.83386	1.48817	1.90426	0.056876	0.512311	Arhgap17
24.1037	-0.11789	0.885784	-0.133092	0.894121	0.995542	Arhgap18
455.939	-0.038959	0.244642	-0.159249	0.873473	0.995542	Arhgap20
202.467	-0.32736	0.332815	-0.983609	0.325308	0.906822	Arhgap21
6.12729	-2.12496	2.18469	-0.972659	0.330723	0.909209	Arhgap22
18.6595	1.47847	0.974304	1.51746	0.129151	0.707743	Arhgap23
7.76051	0.0560875	2.10873	0.0265978	0.978781	0.997724	Arhgap24
10.5055	0.417083	1.4367	0.290305	0.771583	0.991661	Arhgap25
178.404	-0.569964	0.308575	-1.84709	0.0647345	0.536228	Arhgap26
7.86236	-6.37398	2.13262	-2.98881	0.00280068	0.0965216	Arhgap27
48.276	-0.256074	0.664602	-0.385305	0.700012	0.985813	Arhgap29
30.4225	-0.315692	0.777198	-0.406193	0.684601	0.98579	Arhgap31
153.014	-0.417121	0.433823	-0.9615	0.336301	0.910896	Arhgap32
22.0003	-0.531327	0.908303	-0.584966	0.55857	0.977835	Arhgap33
185.63	0.98045	0.31773	3.0858	0.00203006	0.0804496	Arhgap35
36.0833	-0.398858	0.745289	-0.535172	0.592531	0.981624	Arhgap39
6.22192	-0.0641087	1.835	-0.0349366	0.97213	0.997291	Arhgap4
25.3753	-0.235703	0.905048	-0.260431	0.794531	0.992395	Arhgap42
242.044	-0.517144	0.354267	-1.45976	0.144357	0.730255	Arhgap44
911.324	0.343256	0.165103	2.07904	0.0376138	0.423945	Arhgap5
31.1078	0.43624	1.18094	0.369402	0.711828	0.985965	Arhgap6
181.578	-0.137849	0.353041	-0.390461	0.696196	0.98579	Arhgdia
26.269	0.0906774	0.99977	0.0906982	0.927732	0.995542	Arhgdib
388.084	-0.213935	0.254849	-0.839456	0.401213	0.936232	Arhgdig
11.3988	-4.94692	1.60989	-3.07283	0.00212039	0.0826603	Arhgef1
31.7815	0.728248	0.81574	0.892745	0.371994	0.925962	Arhgef10
7.99491	0.195685	1.74997	0.111822	0.910965	0.995542	Arhgef10l
8.80406	-1.21056	1.33447	-0.90714	0.364333	0.92361	Arhgef11
258.905	0.284283	0.251449	1.13058	0.258232	0.8803	Arhgef12
7.95653	-1.69801	2.16915	-0.782802	0.433743	0.946245	Arhgef15
36.4498	1.63108	0.909586	1.79321	0.07294	0.566876	Arhgef17
46.468	0.403514	0.59833	0.674401	0.500057	0.964142	Arhgef18
59.7104	1.00481	0.575121	1.74713	0.0806151	0.587069	Arhgef2
38.4251	0.751327	0.737965	1.01811	0.308628	0.898002	Arhgef25
72.6268	-0.30093	0.496088	-0.606606	0.544113	0.973101	Arhgef26
135.728	0.508821	0.377857	1.34659	0.178111	0.78703	Arhgef28
72.7957	0.147648	0.473531	0.311801	0.755191	0.989938	Arhgef3
163.038	-0.333403	0.341261	-0.976973	0.328583	0.907536	Arhgef4
11.1365	-0.285617	1.38371	-0.206414	0.836467	0.995113	Arhgef40
27.41	-0.907954	0.796081	-1.14053	0.254066	0.876701	Arhgef6
74.6906	-0.308312	0.557898	-0.552632	0.580516	0.979539	Arhgef7
438.688	-0.241262	0.223466	-1.07964	0.280305	0.888289	Arhgef9
148.448	-0.0415274	0.339719	-0.12224	0.902709	0.995542	Arid1a
172.19	1.4018	0.313951	4.46502	8.00624e-06	0.00116753	Arid1b
55.1983	-0.206213	0.604075	-0.34137	0.732825	0.988482	Arid2
5.86468	2.58148	2.07389	1.24475	0.213223	0.833246	Arid3a
273.206	-0.222936	0.299604	-0.744101	0.456816	0.950696	Arid4a
346.132	0.327344	0.283269	1.15559	0.247847	0.871301	Arid4b
9.56461	-0.272303	1.63437	-0.166611	0.867677	0.995542	Arid5a
112.808	-0.948692	0.421285	-2.2519	0.0243285	0.339572	Arid5b
131.161	-0.14552	0.399209	-0.364521	0.715469	0.985965	Arih1
33.016	-0.110283	0.73399	-0.150251	0.880567	0.995542	Arih2
35.3091	-0.631553	0.797366	-0.79205	0.428332	0.945451	Arl1
11.303	1.56588	1.66182	0.942269	0.346055	0.916384	Arl11
54.7147	0.925069	0.654218	1.41401	0.15736	0.755582	Arl13b
99.5525	-0.14386	0.448624	-0.32067	0.74846	0.989837	Arl14ep
67.9518	0.444889	0.492958	0.902488	0.366798	0.925368	Arl15
160.765	0.111673	0.336543	0.331822	0.740023	0.989826	Arl16
124.362	-0.0328039	0.375168	-0.0874381	0.930323	0.995542	Arl2
84.7279	-0.625394	0.429361	-1.45657	0.145235	0.731565	Arl2bp
596.996	-0.258678	0.182586	-1.41675	0.156557	0.75391	Arl3
247.77	0.043999	0.343008	0.128274	0.897932	0.995542	Arl4a
54.8868	0.434056	0.73641	0.589422	0.555578	0.976997	Arl4c
6.25134	-0.448737	2.01932	-0.222222	0.824141	0.993741	Arl4d
182.945	-0.171044	0.337817	-0.506321	0.612631	0.985187	Arl5a
40.2099	-0.316948	0.715387	-0.443045	0.657733	0.98579	Arl5b
86.3881	0.0127397	0.493791	0.0257998	0.979417	0.997724	Arl6
1563.96	0.163256	0.117962	1.38398	0.166365	0.772144	Arl6ip1
213.501	-0.706634	0.364231	-1.94007	0.0523709	0.496652	Arl6ip4
159.757	-0.63132	0.361096	-1.74834	0.0804048	0.586622	Arl6ip5
27.2665	0.211652	0.779083	0.271667	0.785878	0.992395	Arl6ip6
174.349	-0.577957	0.358311	-1.613	0.106744	0.653766	Arl8a
307.147	-0.044731	0.238726	-0.187374	0.851367	0.995542	Arl8b
289.769	0.0847022	0.251346	0.336994	0.736122	0.989099	Armc1
27.1216	-1.0365	0.858978	-1.20667	0.22756	0.849	Armc10
12.5659	0.201506	1.08839	0.185141	0.853118	0.995542	Armc3
12.298	1.01334	1.15166	0.879897	0.378915	0.926248	Armc5
25.0075	-0.210119	0.788645	-0.26643	0.789908	0.992395	Armc6
116.521	0.44305	0.395591	1.11997	0.262727	0.881616	Armc8
14.2847	0.141147	1.09584	0.128802	0.897514	0.995542	Armc9
111.796	-0.239246	0.432923	-0.552629	0.580517	0.979539	Armcx1
66.6588	0.288681	0.569346	0.50704	0.612126	0.985187	Armcx2
54.3278	-0.376975	0.563623	-0.668843	0.503596	0.964142	Armcx3
69.8017	0.35125	0.540439	0.649935	0.515734	0.966807	Armcx4
86.9111	0.400017	0.481687	0.83045	0.406285	0.939239	Armcx5
9.30041	-2.83344	1.55302	-1.82448	0.06808	0.550042	Armcx6
36.3244	0.777348	0.692754	1.12211	0.261815	0.881616	Armt1
8.59492	1.97357	1.56518	1.26092	0.207336	0.827924	Arnt
121.197	0.185227	0.429355	0.431409	0.666171	0.98579	Arnt2
40.6156	-0.52404	0.651426	-0.804451	0.421137	0.94223	Arntl
453.203	0.185551	0.233307	0.795309	0.426434	0.944965	Arpc1a
10.1404	1.07347	1.56652	0.685257	0.493182	0.96129	Arpc1b
1076.72	0.0990315	0.168823	0.586601	0.557472	0.977443	Arpc2
56.8871	-0.65565	0.616347	-1.06377	0.287434	0.888289	Arpc3
54.9384	0.18944	0.623374	0.303895	0.761208	0.991173	Arpc4
622.741	0.109032	0.174189	0.625939	0.531355	0.970305	Arpc5
326.152	-0.385296	0.248655	-1.54952	0.121256	0.690921	Arpc5l
7.47095	1.97611	1.9001	1.04001	0.298337	0.892814	Arpin
631.533	0.0625412	0.168599	0.370948	0.710677	0.985965	Arpp19
1017.09	-0.0234474	0.179271	-0.130793	0.895939	0.995542	Arpp21
33.059	0.300761	0.773967	0.388597	0.697574	0.985813	Arrb1
37.2615	0.335758	0.685462	0.489828	0.624256	0.985263	Arrb2
7.57729	-5.32144	2.4704	-2.15408	0.0312337	0.38835	Arrdc1
66.0177	-0.35702	0.560748	-0.636686	0.524329	0.967928	Arrdc3
18.0149	0.780692	1.28418	0.607932	0.543233	0.973101	Arrdc4
23.2257	0.252173	1.34235	0.187859	0.850987	0.995542	Arsa
94.9278	-0.0256799	0.464879	-0.05524	0.955947	0.995542	Arsb
19.7832	-0.245578	1.21317	-0.202427	0.839583	0.995488	Arsg
16.7409	1.44552	1.14429	1.26324	0.206502	0.826796	Arsj
27.8362	0.575902	0.824853	0.698188	0.48506	0.957634	Arsk
13.8463	-0.297032	1.27938	-0.232169	0.816407	0.992395	Art3
6.85178	0.485979	1.71898	0.282714	0.777396	0.992299	Arv1
16.2428	2.40025	1.27519	1.88227	0.059799	0.518609	Arvcf
35.6913	0.0753071	0.72268	0.104205	0.917006	0.995542	Arx
37.8825	-0.0536933	0.79037	-0.0679344	0.945838	0.995542	Arxes1
157.86	0.131091	0.325732	0.402449	0.687353	0.98579	Arxes2
15.3781	-0.631897	1.04918	-0.602278	0.546989	0.974585	As3mt
73.6648	0.38731	0.559639	0.692071	0.488893	0.958887	Asah1
15.2413	-0.274304	1.25252	-0.219001	0.826649	0.995113	Asah2
236.57	-0.288847	0.339707	-0.850282	0.395168	0.934203	Asap1
81.5038	-0.946232	0.509395	-1.85756	0.0632315	0.529334	Asap2
27.0932	-0.497163	0.831551	-0.597875	0.549923	0.974891	Asb1
30.4488	0.949972	0.721296	1.31704	0.187827	0.804105	Asb13
33.5418	0.228326	0.862958	0.264586	0.791329	0.992395	Asb3
24.4821	-0.659679	1.21104	-0.544723	0.585944	0.980336	Asb6
44.0265	1.39404	0.657658	2.11971	0.0340305	0.404196	Asb7
59.9664	-0.326801	0.517165	-0.631909	0.527447	0.969228	Asb8
86.2793	-0.203075	0.505739	-0.401541	0.688022	0.98579	Ascc1
10.0943	2.50477	1.70208	1.4716	0.14113	0.7273	Ascc2
107.105	-0.491383	0.557116	-0.882013	0.37777	0.925962	Ascc3
16.5282	-0.36348	1.21448	-0.299289	0.764719	0.991173	Ascl1
88.4887	-0.380435	0.575069	-0.661546	0.508262	0.964641	Asf1a
596.762	0.296585	0.199944	1.48334	0.137983	0.720855	Ash1l
49.5197	-0.877994	0.619406	-1.41748	0.156343	0.75391	Ash2l
7.32767	-1.72498	2.08615	-0.826871	0.40831	0.939239	Asic1
32.7811	-0.927368	0.805736	-1.15096	0.24975	0.872794	Asic2
34.6171	0.151926	0.69216	0.219496	0.826264	0.995113	Asl
333.404	-0.219267	0.234348	-0.935646	0.349455	0.916439	Asna1
219.003	-0.0259816	0.323045	-0.0804273	0.935897	0.995542	Asns
80.33	0.113216	0.488512	0.231757	0.816726	0.992395	Asnsd1
89.3909	1.18951	0.444843	2.674	0.00749535	0.172583	Aspa
202.461	-0.0539743	0.311172	-0.173455	0.862294	0.995542	Asph
25.9167	0.169125	0.993523	0.170227	0.864831	0.995542	Asphd1
100.931	-1.02171	0.572053	-1.78605	0.0740916	0.569401	Asphd2
6.47345	-0.0846571	1.93325	-0.04379	0.965072	0.995542	Aspn
32.567	-0.258834	0.710755	-0.364168	0.715732	0.985965	Aspscr1
179.968	0.0447032	0.380719	0.117418	0.906529	0.995542	Asrgl1
9.33827	0.439325	2.07342	0.211884	0.832198	0.995113	Aste1
192.542	-0.107966	0.305716	-0.353157	0.723971	0.986564	Astn1
8.61357	-0.79044	1.5121	-0.522744	0.601153	0.984071	Astn2
30.7289	-1.3419	0.785399	-1.70856	0.0875331	0.606913	Asun
34.4328	0.658681	0.709576	0.928275	0.353265	0.919087	Asxl1
78.5721	0.586702	0.620165	0.946042	0.344127	0.915581	Asxl2
31.5587	0.056231	0.801618	0.0701469	0.944077	0.995542	Asxl3
157.955	-0.129207	0.34665	-0.37273	0.70935	0.985965	Atad1
40.4631	0.0952139	0.72448	0.131424	0.89544	0.995542	Atad2
98.3561	0.115253	0.450589	0.255783	0.798118	0.992395	Atad2b
46.1534	0.71261	0.623785	1.1424	0.253289	0.87609	Atad3a
6.7986	-1.17461	1.60338	-0.732586	0.463811	0.954042	Atad3aos
15.6147	-1.04438	1.28039	-0.815674	0.414686	0.939772	Atad5
19.6546	-1.09238	1.00719	-1.08459	0.278105	0.888289	Atat1
76.652	-0.194713	0.46565	-0.418152	0.675836	0.98579	Atcay
490.786	0.0557908	0.207214	0.269243	0.787742	0.992395	Ate1
20.1599	0.572691	0.923084	0.62041	0.534988	0.970895	Atf1
268.041	-0.104546	0.260577	-0.401211	0.688265	0.98579	Atf2
5.53559	0.428672	2.29586	0.186716	0.851884	0.995542	Atf3
136.586	-0.185275	0.358097	-0.517389	0.604885	0.984071	Atf4
140.782	-0.543911	0.419429	-1.29679	0.194703	0.811516	Atf6
20.6738	0.80956	0.957612	0.845394	0.397891	0.934371	Atf6b
36.0789	0.341959	0.761791	0.448889	0.653512	0.98579	Atf7
52.3746	-0.95386	0.730471	-1.30582	0.191615	0.808631	Atf7ip
50.6796	0.172475	0.743234	0.232061	0.816491	0.992395	Atg10
60.636	-0.546428	0.608448	-0.89807	0.369148	0.925962	Atg101
125.237	-0.343824	0.367855	-0.934674	0.349956	0.916472	Atg12
62.6372	0.661093	0.565235	1.16959	0.242166	0.863668	Atg13
43.0033	0.678477	0.659713	1.02844	0.303742	0.895679	Atg14
44.4375	-0.120671	1.83093	-0.065907	0.947452	0.995542	Atg16l1
7.60223	1.32045	1.6935	0.779713	0.43556	0.946783	Atg16l2
12.0511	-0.141277	1.21601	-0.116181	0.907509	0.995542	Atg2a
98.9516	0.00886392	0.423434	0.0209334	0.983299	0.997932	Atg2b
125.097	0.071409	0.420323	0.169891	0.865096	0.995542	Atg3
26.1607	0.444459	0.826446	0.537796	0.590718	0.981288	Atg4b
41.7655	0.950599	0.676774	1.4046	0.160139	0.75923	Atg4c
8.72891	-2.09051	1.60494	-1.30255	0.192729	0.8091	Atg4d
146.763	-0.374155	0.349527	-1.07046	0.284412	0.888289	Atg5
36.9479	0.0416616	0.863864	0.0482271	0.961535	0.995542	Atg7
55.1979	-0.416624	0.656705	-0.634416	0.525809	0.968359	Atg9a
9.22998	-1.01125	1.98184	-0.510258	0.60987	0.985187	Atg9b
50.1826	-0.0399498	0.575565	-0.0694098	0.944663	0.995542	Atic
355.155	0.436431	0.230587	1.8927	0.0583981	0.516346	Atl1
75.8981	-0.0519106	0.500434	-0.103731	0.917383	0.995542	Atl2
19.5562	1.28591	1.18873	1.08175	0.279363	0.888289	Atl3
86.0426	-0.0349877	0.439487	-0.0796103	0.936547	0.995542	Atm
163.779	-1.05962	0.374033	-2.83296	0.00461197	0.129832	Atmin
31.8879	-0.660979	0.729546	-0.906013	0.364929	0.924612	Atn1
515.117	-0.0673465	0.219981	-0.306147	0.759493	0.990738	Atox1
4.82207	-5.67048	2.59202	-2.18767	0.0286936		Atp10b
6.55208	-6.10958	2.36146	-2.5872	0.00967593	0.203906	Atp10d
16.5594	1.39436	1.03227	1.35078	0.176766	0.786043	Atp11a
63.1689	-0.0126191	0.505366	-0.0249702	0.980079	0.997724	Atp11b
34.8722	0.384937	0.878535	0.438158	0.661272	0.98579	Atp11c
48.176	1.33227	0.748994	1.77874	0.075282	0.573328	Atp13a1
105.584	-0.571147	0.427543	-1.33588	0.181587	0.791796	Atp13a2
89.6926	0.465128	0.427127	1.08897	0.276167	0.888289	Atp13a3
16.6784	-0.10203	1.25864	-0.0810633	0.935392	0.995542	Atp13a4
6.19355	-0.62301	1.72557	-0.361046	0.718065	0.985965	Atp13a5
326.607	0.299626	0.243149	1.23228	0.217846	0.836811	Atp1a1
890.97	0.00130844	0.169319	0.00772767	0.993834	0.998891	Atp1a2
326.173	-0.240184	0.287594	-0.83515	0.403633	0.939081	Atp1a3
5715	-0.246124	0.0847286	-2.90486	0.00367422	0.11391	Atp1b1
225.969	-0.763528	0.315486	-2.42017	0.0155134	0.269372	Atp1b2
216.9	0.365842	0.331568	1.10337	0.269867	0.884587	Atp1b3
1279.51	0.273937	0.144114	1.90084	0.0573225	0.512579	Atp2a2
3084.43	0.607464	0.116438	5.21708	1.81768e-07	3.90372e-05	Atp2b1
509.444	-0.219781	0.198553	-1.10692	0.26833	0.883859	Atp2b2
155.79	0.136125	0.382827	0.355579	0.722156	0.986136	Atp2b3
194.936	-0.174983	0.307675	-0.568726	0.569542	0.9788	Atp2b4
240.676	0.335907	0.26195	1.28233	0.199726	0.819238	Atp2c1
1072.14	0.143729	0.160038	0.898092	0.369136	0.925962	Atp5a1
1380.09	0.129528	0.117481	1.10254	0.270225	0.88541	Atp5b
1082.61	-0.116919	0.141056	-0.828882	0.407171	0.939239	Atp5c1
582.353	-0.401009	0.188794	-2.12405	0.0336659	0.403619	Atp5d
949.484	-0.178782	0.152256	-1.17422	0.240308	0.860678	Atp5e
1340.58	-0.173235	0.141486	-1.2244	0.220802	0.84025	Atp5f1
871.881	-0.462186	0.148844	-3.10518	0.00190164	0.0777237	Atp5g1
12.9284	-0.892361	1.18665	-0.751999	0.452052	0.949273	Atp5g2
892.189	-0.206307	0.143153	-1.44117	0.149536	0.740481	Atp5g3
1722.47	-0.281794	0.117873	-2.39066	0.016818	0.279795	Atp5h
1411.09	-0.273731	0.139763	-1.95854	0.0501664	0.48623	Atp5j
2303.33	-0.166003	0.0972912	-1.70625	0.0879621	0.608675	Atp5j2
2115.82	0.0629832	0.112277	0.56096	0.574825	0.9788	Atp5k
859.507	-0.237224	0.155228	-1.52823	0.126455	0.702532	Atp5l
2959.25	-0.300976	0.0930525	-3.23448	0.00121867	0.0575043	Atp5o
63.5464	-0.217628	0.541651	-0.401786	0.687841	0.98579	Atp5s
21.6207	-0.261485	0.928012	-0.281769	0.778121	0.992299	Atp5sl
101.924	1.54725	0.445053	3.47655	0.000507918	0.0306099	Atp6ap1
7.34304	0.821883	1.95062	0.421346	0.673503	0.98579	Atp6ap1l
433.722	0.0215507	0.246699	0.0873563	0.930388	0.995542	Atp6ap2
239.703	-0.295139	0.30592	-0.964758	0.334666	0.910508	Atp6v0a1
77.0812	0.0783504	0.505053	0.155133	0.876716	0.995542	Atp6v0a2
1147.73	0.284434	0.129311	2.19962	0.0278342	0.363911	Atp6v0b
403.064	0.130027	0.22213	0.585368	0.558301	0.977835	Atp6v0d1
230.157	0.291423	0.305058	0.955302	0.339425	0.91393	Atp6v0e
258.871	0.314627	0.295471	1.06483	0.286951	0.888289	Atp6v0e2
1478.44	0.295862	0.127265	2.32477	0.0200843	0.310066	Atp6v1a
875.5	0.00193002	0.163889	0.0117763	0.990604	0.997932	Atp6v1b2
720.025	-0.194822	0.161115	-1.20921	0.226583	0.846511	Atp6v1c1
7.25608	2.70284	2.19267	1.23267	0.217698	0.836558	Atp6v1c2
1594.89	-0.0799861	0.10759	-0.743435	0.457218	0.950696	Atp6v1d
1333.65	-0.0351913	0.12646	-0.278279	0.780798	0.992395	Atp6v1e1
1242.17	-0.130635	0.144302	-0.905292	0.365311	0.924984	Atp6v1f
577.003	0.0603634	0.178396	0.338368	0.735086	0.988848	Atp6v1g1
423.521	-0.909986	0.211651	-4.29947	1.71207e-05	0.00229807	Atp6v1g2
406.319	-0.132484	0.202674	-0.653681	0.513317	0.965959	Atp6v1h
21.1259	0.259582	1.14343	0.22702	0.820408	0.992824	Atp7a
724.895	0.796093	0.176981	4.49819	6.85349e-06	0.00102473	Atp8a1
38.7858	-0.86457	0.839476	-1.02989	0.30306	0.895679	Atp8a2
16.9723	0.0529117	1.07031	0.049436	0.960572	0.995542	Atp8b2
231.272	-0.336469	0.291981	-1.15237	0.24917	0.87224	Atp9a
70.0391	-1.2949	0.547112	-2.3668	0.0179426	0.291124	Atp9b
22.5785	-1.41276	0.917387	-1.53999	0.123564	0.696857	Atpaf1
17.9504	-1.84332	0.981931	-1.87724	0.0604849	0.520115	Atpaf2
2069.93	-0.0493053	0.129002	-0.382206	0.702308	0.985813	Atpif1
11.7988	0.257896	1.54181	0.167269	0.867158	0.995542	Atr
252.201	-0.392215	0.288995	-1.35717	0.174728	0.78371	Atraid
101.843	-0.219914	0.390519	-0.563133	0.573344	0.9788	Atrip
126.86	0.990426	0.380923	2.60007	0.0093205	0.19801	Atrn
59.8142	-0.624757	0.764651	-0.817048	0.413901	0.939772	Atrnl1
965.587	0.431891	0.171302	2.52122	0.0116948	0.22899	Atrx
357.231	0.236026	0.294345	0.801868	0.422629	0.94223	Atxn1
672.932	0.109292	0.18741	0.583169	0.55978	0.977835	Atxn10
11.2966	3.18321	1.36921	2.32484	0.0200803	0.310066	Atxn1l
153.813	0.530247	0.353935	1.49815	0.134095	0.710987	Atxn2
47.1694	0.35445	0.600427	0.590329	0.55497	0.976997	Atxn2l
99.9367	-0.21437	0.440136	-0.487053	0.626221	0.985263	Atxn3
41.4173	0.849042	0.66924	1.26867	0.20456	0.824101	Atxn7
23.0571	0.665063	0.908888	0.731733	0.464332	0.954042	Atxn7l1
6.89943	0.113765	1.93077	0.0589221	0.953014	0.995542	Atxn7l2
87.788	0.227876	0.571933	0.398431	0.690312	0.98579	Atxn7l3
963.849	-0.415188	0.178445	-2.32671	0.0199809	0.310066	Atxn7l3b
36.1914	0.94961	0.862515	1.10098	0.270906	0.88542	AU019823
32.261	0.312921	0.801296	0.390519	0.696153	0.98579	AU022252
50.291	-0.104372	0.666842	-0.156517	0.875626	0.995542	AU040320
51.5222	-0.856964	0.654404	-1.30953	0.190354	0.807727	AU041133
132.973	0.0298198	0.464845	0.0641499	0.948851	0.995542	Auh
39.5078	-1.15251	0.950773	-1.21218	0.225443	0.845295	Aup1
374.205	-0.174271	0.231316	-0.753389	0.451216	0.949273	Aurkaip1
91.6525	0.0998223	0.413815	0.241225	0.809381	0.992395	Auts2
12.0014	-4.39487	1.54437	-2.84573	0.00443096	0.126421	Aven
95.518	0.645222	0.464222	1.3899	0.164559	0.768595	Avl9
167.71	-0.619733	0.352348	-1.75887	0.0786	0.582159	Avpi1
8.09312	0.00657705	1.65336	0.00397798	0.996826	0.999626	AW112010
24.4697	-1.84688	0.983986	-1.87694	0.0605262	0.520115	AW146154
65.059	0.582491	0.666821	0.873533	0.382373	0.928956	AW209491
13.8531	0.287238	1.59446	0.180148	0.857037	0.995542	AW495222
99.53	-0.381712	0.566431	-0.67389	0.500381	0.964142	AW549877
11.5651	-2.22487	1.52995	-1.45421	0.145889	0.732983	AW551984
37.9151	-0.118025	0.711858	-0.165799	0.868315	0.995542	AW554918
13.7264	-1.29842	1.44698	-0.89733	0.369543	0.925962	Axin1
34.247	0.253478	0.777047	0.326207	0.744268	0.989837	Axin2
39.7854	1.90656	0.735714	2.59144	0.00955753	0.201956	Axl
196.83	-0.295543	0.341752	-0.86479	0.387154	0.930976	Azi2
236.256	0.0432364	0.297135	0.145511	0.884307	0.995542	Azin1
30.8482	0.762307	1.04339	0.730603	0.465022	0.954042	Azin2
8.3032	0.0162592	1.60138	0.0101532	0.991899	0.997932	B130034C11Rik
7.60577	3.03074	1.79133	1.69189	0.0906662	0.617262	B230110G15Rik
151.143	0.305516	0.327856	0.931859	0.351409	0.917455	B230118H07Rik
180.863	0.090319	0.323859	0.278884	0.780334	0.992395	B230209E15Rik
122.657	-0.416272	0.438847	-0.948559	0.342845	0.914816	B230217C12Rik
20.5539	0.641545	1.13089	0.56729	0.570517	0.9788	B230217O12Rik
563.616	-0.427856	0.19142	-2.23517	0.0254065	0.345274	B230219D22Rik
40.8913	0.76478	0.639994	1.19498	0.232095	0.854497	B230307C23Rik
41.5466	-0.32193	0.697266	-0.461703	0.644295	0.985263	B230354K17Rik
603.779	1.79395	0.194477	9.22446	2.84984e-20	6.73247e-17	B2m
7.74043	6.53653	1.95841	3.33767	0.00084485	0.0441565	B330016D10Rik
84.0404	0.309902	0.491516	0.630503	0.528365	0.969274	B3galnt1
14.9677	0.67191	1.17652	0.5711	0.567932	0.9788	B3galnt2
169.023	0.434617	0.35897	1.21073	0.225997	0.845681	B3galt1
327.461	-0.281237	0.250593	-1.12228	0.261742	0.881616	B3galt2
78.3783	0.212962	0.513598	0.414646	0.678401	0.98579	B3galt5
10.2761	-2.31158	1.57641	-1.46636	0.142551	0.728518	B3galt6
111.9	-0.385809	0.478951	-0.805529	0.420514	0.94223	B3gat1
16.6919	1.37492	1.10924	1.23952	0.215155	0.833248	B3gat2
116	0.684112	0.506152	1.35159	0.176505	0.786043	B3gat3
42.204	-0.392641	0.663578	-0.591703	0.554049	0.976997	B3glct
72.3527	0.18411	0.614843	0.299443	0.764602	0.991173	B3gnt2
5.95665	-5.97398	2.44006	-2.44829	0.0143535	0.257331	B3gnt7
6.10174	-2.15883	1.95029	-1.10693	0.268324	0.883859	B3gnt9
5.39795	-1.70205	2.11972	-0.80296	0.421998		B3gntl1
39.6169	-0.978406	0.674386	-1.45081	0.146833	0.734713	B4galnt1
12.8599	-0.870039	1.10724	-0.785771	0.432002	0.945451	B4galnt4
19.1844	3.93508	1.10705	3.55456	0.000378611	0.0243052	B4galt1
41.2179	0.0611508	0.619253	0.0987493	0.921337	0.995542	B4galt2
21.2258	-0.223255	1.22184	-0.18272	0.855018	0.995542	B4galt3
28.1092	-0.615081	0.817027	-0.752829	0.451553	0.949273	B4galt4
6.44349	-0.494516	2.02845	-0.24379	0.807394	0.992395	B4galt5
221.648	0.477334	0.287159	1.66226	0.0964598	0.634112	B4galt6
5.50592	6.0474	2.46913	2.4492	0.0143175		B4galt7
51.4783	0.0377489	0.70959	0.0531982	0.957574	0.995542	B4gat1
78.769	0.506488	0.502045	1.00885	0.313047	0.90166	B630005N14Rik
31.2858	0.589639	0.783093	0.752961	0.451473	0.949273	B630019K06Rik
15.6573	1.20398	1.08243	1.1123	0.266009	0.882364	B930041F14Rik
5.17454	0.9981	2.63036	0.379454	0.704351		B930059L03Rik
48.7485	0.837069	0.621323	1.34724	0.177904	0.786747	B9d1
27.5626	0.497327	0.95532	0.520587	0.602654	0.984071	B9d2
213.452	-0.716152	0.316446	-2.26311	0.0236287	0.333322	Baalc
115.119	-0.611238	0.459929	-1.32898	0.183853	0.797035	Babam1
99.902	0.198383	0.488333	0.406246	0.684562	0.98579	Bace1
9.40766	-3.28434	1.75052	-1.87621	0.0606258	0.520115	Bace2
34.0939	-0.332822	0.750029	-0.443745	0.657227	0.98579	Bach1
25.1835	-0.117008	1.12564	-0.103948	0.91721	0.995542	Bach2
61.5996	0.181738	0.585499	0.310399	0.756258	0.990236	Bad
495.18	-0.122451	0.194525	-0.629485	0.529031	0.969466	Bag1
16.6719	-0.147666	1.50964	-0.0978157	0.922079	0.995542	Bag2
288.904	-0.336706	0.258727	-1.3014	0.193123	0.809732	Bag4
106.168	-0.378521	0.399366	-0.947806	0.343228	0.915188	Bag5
117.47	-0.230399	0.383998	-0.600002	0.548505	0.974864	Bag6
9.45962	-2.67631	1.68552	-1.58782	0.112326	0.670226	Bahcc1
20.1188	-0.523676	0.89662	-0.584056	0.559183	0.977835	Bahd1
240.164	-0.274058	0.288744	-0.949138	0.342551	0.914804	Baiap2
6.81118	-0.862839	1.5376	-0.561158	0.57469	0.9788	Baiap3
37.4038	-1.62296	1.92958	-0.841096	0.400294	0.935366	Bambi
8.80574	2.0786	2.27941	0.911905	0.361819	0.922095	Bambi-ps1
249.82	-0.789735	0.288317	-2.73912	0.00616044	0.153844	Banf1
13.3684	1.22369	1.28895	0.949368	0.342434	0.914804	Bank1
68.7078	-0.0320448	0.481821	-0.0665076	0.946974	0.995542	Banp
58.6649	1.18968	0.706549	1.68379	0.0922214	0.623179	Bap1
1123.57	0.295275	0.139878	2.11094	0.0347771	0.408743	Basp1
28.2959	0.701411	0.876035	0.800666	0.423325	0.94223	Bax
6.4848	1.52883	1.70947	0.894334	0.371143	0.925962	Baz1a
227.667	0.278199	0.31773	0.875584	0.381256	0.92777	Baz1b
63.9903	0.134784	0.547573	0.246148	0.805568	0.992395	Baz2a
108.323	0.207105	0.462883	0.447423	0.654569	0.98579	Baz2b
4.602	-0.783699	2.71993	-0.288132	0.773245		BB557941
5.43768	-1.25414	1.81659	-0.690381	0.489954		Bbc3
274.261	0.442022	0.30062	1.47037	0.141462	0.7273	Bbip1
6.37906	-0.819143	2.00629	-0.408287	0.683063	0.98579	Bbox1
23.473	1.48403	1.30595	1.13636	0.255807	0.87817	Bbs1
12.5568	0.0109967	1.47976	0.00743143	0.994071	0.998891	Bbs10
11.3405	0.890495	1.89505	0.469905	0.638423	0.985263	Bbs12
16.0612	0.116576	1.24705	0.0934818	0.925521	0.995542	Bbs2
193.749	0.119507	0.379017	0.315307	0.752529	0.989837	Bbs4
15.6264	-0.267712	1.1567	-0.231444	0.81697	0.992395	Bbs5
31.2594	-0.706746	0.770319	-0.917472	0.358896	0.921321	Bbs7
18.5802	0.711898	1.11957	0.635866	0.524864	0.967928	Bbs9
113.081	1.96375	0.442418	4.43868	9.05119e-06	0.0012881	Bbx
49.9446	0.542373	0.699486	0.775387	0.438111	0.94773	BC002163
273.358	0.305215	0.256147	1.19156	0.233434	0.855532	BC003331
109.087	0.0874614	0.453985	0.192653	0.847231	0.995542	BC003965
182.247	-0.325456	0.303574	-1.07208	0.283684	0.888289	BC004004
124.282	0.145923	0.377945	0.386095	0.699426	0.985813	BC005537
107.04	0.506283	0.426512	1.18703	0.235215	0.856537	BC005561
156.817	0.00253521	0.345856	0.00733026	0.994151	0.998891	BC005624
25.7522	-0.0952952	0.9931	-0.0959574	0.923554	0.995542	BC017643
9.90416	3.81091	1.88416	2.02261	0.0431139	0.451473	BC020402
4.83817	-0.536881	2.68472	-0.199977	0.841499		BC021891
14.929	-1.68295	1.29335	-1.30123	0.193179	0.809732	BC022687
10.7862	-1.09044	1.19384	-0.913389	0.361038	0.922095	BC023829
4.61311	4.78336	2.32972	2.05319	0.0400543		BC026585
40.5512	-0.625513	0.701637	-0.891506	0.372658	0.925962	BC029214
66.328	-0.645934	0.66219	-0.97545	0.329337	0.907536	BC029722
184.666	0.366285	0.322874	1.13445	0.256605	0.878322	BC030336
66.3319	1.52052	0.608493	2.49883	0.0124605	0.239134	BC030500
445.988	-0.323817	0.237706	-1.36226	0.173116	0.782607	BC031181
7.01034	0.536645	1.81362	0.295897	0.767309	0.991173	BC031361
15.4895	-0.176934	1.19025	-0.148653	0.881828	0.995542	BC037034
12.152	-0.380057	1.46397	-0.259607	0.795167	0.992395	BC048403
84.9176	0.107593	0.480011	0.224147	0.822643	0.992853	BC048546
17.1579	-0.8072	1.01964	-0.791653	0.428563	0.945451	BC052040
10.4998	-0.753179	1.4981	-0.502756	0.615136	0.985187	BC064078
6.8252	5.36436	2.25127	2.38281	0.017181	0.28265	BC065397
26.4257	0.575233	0.773072	0.744087	0.456824	0.950696	BC068281
11.8954	0.18394	1.10786	0.166032	0.868132	0.995542	Bc1
7.6639	3.08449	2.06773	1.49173	0.135771	0.714674	Bcam
99.2972	0.487423	0.491198	0.992313	0.321045	0.906353	Bcan
283.277	0.392812	0.285629	1.37525	0.169053	0.774791	Bcap29
298.166	0.0196327	0.2835	0.0692511	0.94479	0.995542	Bcap31
53.1639	-0.0581675	0.76062	-0.0764738	0.939042	0.995542	Bcar1
16.5272	2.11431	1.24217	1.70211	0.0887348	0.610446	Bcar3
50.2227	1.40006	0.79676	1.75719	0.0788854	0.582159	Bcas1
129.872	-0.0406162	0.434591	-0.0934586	0.925539	0.995542	Bcas2
41.0342	-0.508734	0.657798	-0.77339	0.439291	0.94802	Bcas3
58.6334	-0.264808	0.574481	-0.460952	0.644833	0.985263	Bcat1
194.05	-0.0241065	0.295365	-0.081616	0.934952	0.995542	Bccip
9.78104	0.139106	1.35429	0.102716	0.918189	0.995542	Bcdin3d
17.2963	1.27496	1.46202	0.872054	0.383179	0.929768	Bche
14.3087	-1.63977	1.27849	-1.28258	0.199638	0.819238	Bckdha
81.4702	0.0286736	0.529629	0.0541389	0.956824	0.995542	Bckdhb
89.5415	0.170033	0.509649	0.333629	0.73866	0.989099	Bckdk
25.7477	0.332964	0.837534	0.397553	0.69096	0.98579	Bcl10
172.749	0.0686925	0.383067	0.179323	0.857684	0.995542	Bcl11a
481.122	0.528193	0.198007	2.66755	0.00764058	0.174248	Bcl11b
33.2577	0.679515	0.747588	0.908942	0.363381	0.92247	Bcl2
7.6039	6.50907	2.2625	2.87693	0.00401559	0.119176	Bcl2a1a
27.7419	1.48744	1.0531	1.41245	0.157818	0.755997	Bcl2a1b
101.811	-0.16043	0.497339	-0.322577	0.747016	0.989837	Bcl2l1
7.02375	2.00322	1.88561	1.06237	0.288068	0.888289	Bcl2l11
40.4364	-0.52134	0.684634	-0.761487	0.446366	0.949273	Bcl2l13
54.8581	-0.497055	0.636348	-0.781106	0.43474	0.946342	Bcl2l2
24.765	-0.388909	0.821049	-0.473673	0.635733	0.985263	Bcl6
123.362	-0.316711	0.444063	-0.713211	0.475715	0.954845	Bcl7a
88.6581	-0.13546	0.43025	-0.31484	0.752883	0.989837	Bcl7b
16.9717	-0.338638	0.966325	-0.350439	0.726009	0.986629	Bcl7c
66.6356	0.495952	0.532752	0.930925	0.351893	0.917455	Bcl9
18.4801	-0.720739	1.29995	-0.554435	0.579281	0.979539	Bcl9l
466.799	0.618561	0.203219	3.04382	0.00233595	0.087042	Bclaf1
13.6632	2.29739	1.65179	1.39085	0.164271	0.767884	Bco2
24.2685	-0.325173	0.963804	-0.337385	0.735827	0.988917	Bcor
15.0382	-1.37976	1.45349	-0.949273	0.342482	0.914804	Bcorl1
72.1469	-0.613976	0.573041	-1.07143	0.283974	0.888289	Bcr
29.5714	2.0115	1.02251	1.96722	0.0491575	0.480139	Bcs1l
17.3188	0.417657	0.983742	0.42456	0.671158	0.98579	Bdh1
14.3657	-0.44021	1.53565	-0.28666	0.774373	0.992096	Bdh2
297.178	-0.837068	0.299077	-2.79883	0.00512877	0.137372	Bdnf
147.505	0.441761	0.354552	1.24597	0.212776	0.833246	Bdp1
10.2928	-0.860164	1.53363	-0.560869	0.574887	0.9788	Bean1
98.6046	-0.633909	0.496712	-1.27621	0.201881	0.820584	Becn1
38.306	-0.473895	0.682336	-0.694519	0.487357	0.958644	Begain
8.59481	0.400681	2.03764	0.19664	0.844109	0.995488	Bend3
24.6034	-0.926242	0.903706	-1.02494	0.305393	0.896091	Bend4
21.3887	0.511922	0.967743	0.528986	0.596815	0.982811	Bend5
601.909	0.0807394	0.191542	0.421522	0.673374	0.98579	Bend6
76.5421	-0.0554078	0.529706	-0.104601	0.916693	0.995542	Bet1
225.676	-0.370952	0.301243	-1.23141	0.218171	0.83703	Bet1l
117.118	-0.205036	0.426217	-0.481062	0.630473	0.985263	Bex1
906.447	-0.347587	0.156149	-2.226	0.0260139	0.347598	Bex2
55.7756	-1.29853	0.581456	-2.23324	0.0255329	0.345801	Bex4
49.6398	-0.223333	0.599279	-0.37267	0.709394	0.985965	Bfar
15.1072	0.74092	1.25601	0.5899	0.555258	0.976997	Bfsp2
100.806	-0.315961	0.415144	-0.761088	0.446604	0.949273	Bhlhb9
105.879	0.229597	0.456895	0.502515	0.615305	0.985187	Bhlhe22
103.524	-0.374496	0.589862	-0.634888	0.525502	0.968196	Bhlhe40
294.884	1.29763	0.28922	4.48664	7.2355e-06	0.00106832	Bhlhe41
13.926	-0.255289	1.5542	-0.164258	0.869528	0.995542	Bicc1
238.1	-0.114319	0.260968	-0.438057	0.661345	0.98579	Bicd1
68.6943	0.274028	0.579668	0.472734	0.636403	0.985263	Bicd2
13.9465	1.89869	1.33633	1.42083	0.155366	0.753343	Bid
290.493	-0.103164	0.296195	-0.348298	0.727617	0.986884	Bin1
14.1835	-0.362904	1.25075	-0.290149	0.771702	0.991661	Bin3
77.4921	0.708176	0.51933	1.36364	0.172682	0.782607	Birc2
799.993	0.809975	0.17339	4.67141	2.99139e-06	0.000484031	Birc6
44.2873	-0.464093	0.634349	-0.731605	0.46441	0.954042	Bivm
153.36	-0.186703	0.330052	-0.565678	0.571613	0.9788	Blcap
20.9784	-0.542648	1.47177	-0.368703	0.712349	0.985965	Blm
104.419	-0.235297	0.517638	-0.454558	0.649427	0.985614	Blmh
9.84721	0.221996	1.28931	0.172182	0.863295	0.995542	Blnk
469.407	-0.0918173	0.192257	-0.477575	0.632953	0.985263	Bloc1s1
88.3836	-0.168707	0.584133	-0.288817	0.772721	0.991914	Bloc1s2
13.2053	-3.55999	1.42992	-2.48964	0.0127874	0.242498	Bloc1s3
30.5222	-0.0413449	0.851476	-0.0485567	0.961273	0.995542	Bloc1s4
28.0582	0.659748	0.865609	0.762177	0.445954	0.949273	Bloc1s5
75.9755	-0.443431	0.503291	-0.881063	0.378284	0.925962	Bloc1s6
126.568	-0.0481059	0.438529	-0.109698	0.912649	0.995542	Blvra
55.4236	-0.663759	0.604427	-1.09816	0.272133	0.886741	Blvrb
58.695	-0.263236	0.578138	-0.455317	0.648881	0.985614	Blzf1
5.40553	1.5097	1.88199	0.802183	0.422447		Bmf
104.035	-0.533478	0.466923	-1.14254	0.253229	0.87609	Bmi1
7.75884	0.522122	1.87878	0.277905	0.781086	0.992395	Bmp1
8.99475	0.0128431	1.78755	0.00718475	0.994267	0.998891	Bmp2
65.2748	0.194576	0.630394	0.308659	0.757581	0.990738	Bmp2k
8.77338	-0.131135	1.71268	-0.0765673	0.938968	0.995542	Bmp3
110.547	-0.00710448	0.422724	-0.0168064	0.986591	0.997932	Bmpr1a
51.1654	1.1585	0.59372	1.95125	0.051027	0.490478	Bmpr1b
624.748	0.415678	0.189059	2.19867	0.0279012	0.363911	Bmpr2
36.3573	0.452226	0.789038	0.573135	0.566553	0.9788	Bms1
186.031	-0.467808	0.331022	-1.41322	0.15759	0.755631	Bmyc
5.75929	-5.92201	2.79102	-2.12181	0.033854	0.404196	Bnc2
19.0878	0.476223	0.930263	0.511923	0.608705	0.985187	Bnip1
74.0629	0.373213	0.498099	0.749274	0.453692	0.949328	Bnip2
273.424	-0.340257	0.294734	-1.15445	0.248314	0.872186	Bnip3
384.325	0.336642	0.229604	1.46619	0.142598	0.728518	Bnip3l
22.1788	-1.23752	1.23451	-1.00244	0.316131	0.902498	Boc
113.857	-0.575557	0.42774	-1.34558	0.178439	0.787708	Bod1
424.765	0.227108	0.265635	0.854963	0.392572	0.932863	Bod1l
112.151	-0.416313	0.507483	-0.820349	0.412017	0.939772	Bok
185.101	-0.662815	0.349044	-1.89894	0.0575718	0.512849	Bola1
524.727	0.0744433	0.180633	0.412124	0.680248	0.98579	Bola2
241.323	0.414237	0.294881	1.40476	0.160092	0.75923	Bola3
41.2733	-0.66063	0.740033	-0.892704	0.372016	0.925962	Bop1
78.5429	0.380095	0.569765	0.667108	0.504703	0.964142	Bpgm
55.2204	-0.711392	0.572917	-1.2417	0.214346	0.833246	Bphl
66.6554	0.448899	0.558568	0.803662	0.421592	0.94223	Bpnt1
285.532	0.249649	0.281254	0.887629	0.374741	0.925962	Bptf
653.927	0.373528	0.210241	1.77666	0.0756237	0.573711	Braf
89.9349	-0.0478231	0.499165	-0.0958062	0.923675	0.995542	Brap
15.4477	0.363812	0.995092	0.365606	0.714659	0.985965	Brat1
7.31101	-0.397759	1.89793	-0.209575	0.834	0.995113	Brca1
21.7617	0.475327	1.05291	0.451444	0.65167	0.98579	Brca2
392.33	-0.220621	0.226182	-0.975414	0.329355	0.907536	Brcc3
141.213	0.270554	0.354826	0.762498	0.445763	0.949273	Brd1
191.905	0.31507	0.351218	0.897076	0.369679	0.925962	Brd2
195.718	-0.37897	0.303333	-1.24935	0.211536	0.830949	Brd3
148.32	0.133337	0.341779	0.390125	0.696444	0.985813	Brd4
136.745	0.763314	0.396032	1.9274	0.0539292	0.502969	Brd7
327.941	0.034258	0.283479	0.120848	0.903811	0.995542	Brd8
301.037	0.028892	0.24681	0.117061	0.906811	0.995542	Brd9
29.5206	0.546251	0.768772	0.71055	0.477363	0.955363	Brdt
64.2992	-1.13531	0.50355	-2.25462	0.0241573	0.338087	Bre
25.4964	-2.31282	1.01528	-2.27802	0.0227255	0.328612	Brf1
9.052	-0.559716	1.53017	-0.365787	0.714524	0.985965	Brf2
42.8276	0.747804	0.691235	1.08184	0.279325	0.888289	Bri3
161.756	0.221106	0.345206	0.640506	0.521844	0.966856	Bri3bp
8.20694	5.64061	1.99965	2.82079	0.00479055	0.131095	Bricd5
186.11	0.0485415	0.348353	0.139346	0.889177	0.995542	Brinp1
96.6411	-0.0734051	0.500237	-0.146741	0.883337	0.995542	Brinp2
41.3664	-0.0601399	0.819001	-0.0734308	0.941463	0.995542	Brinp3
6.55009	-0.0495062	1.90827	-0.025943	0.979303	0.997724	Brip1os
125.518	0.958778	0.489083	1.96036	0.0499539	0.485677	Brix1
260.185	-0.222883	0.260747	-0.854789	0.392668	0.932863	Brk1
28.9305	-1.23649	0.811643	-1.52344	0.127649	0.70457	Brms1
92.8177	-0.194415	0.483586	-0.402027	0.687664	0.98579	Brms1l
65.2744	0.180697	0.507098	0.356335	0.72159	0.9861	Brox
28.5211	-0.0164686	1.0888	-0.0151255	0.987932	0.997932	Brpf1
14.6938	-0.219941	1.28657	-0.170952	0.864262	0.995542	Brpf3
84.65	0.122242	0.470107	0.26003	0.79484	0.992395	Brsk1
112.157	0.0883864	0.466816	0.189339	0.849827	0.995542	Brsk2
158.929	-0.00367807	0.339634	-0.0108295	0.991359	0.997932	Brwd1
19.1948	1.30915	1.21226	1.07992	0.280178	0.888289	Brwd3
165.618	-0.824279	0.397906	-2.07154	0.0383081	0.427285	Bscl2
20.2653	-1.54612	0.995759	-1.55271	0.120493	0.689532	Bsdc1
994.842	-0.226253	0.152243	-1.48613	0.137245	0.718575	Bsg
141.278	-0.465113	0.379293	-1.22626	0.220099	0.83892	Bsn
5.82319	4.33326	2.28106	1.89967	0.0574761	0.512579	Bst2
118.592	0.0355634	0.582984	0.0610024	0.951357	0.995542	Btaf1
190.288	0.213555	0.320084	0.667184	0.504655	0.964142	Btbd1
88.1451	-1.00932	0.442024	-2.28341	0.0224065	0.325141	Btbd10
21.7895	1.84258	1.26194	1.46012	0.144257	0.730203	Btbd11
43.1063	-0.555007	0.632446	-0.877557	0.380184	0.927331	Btbd17
42.157	0.0228364	0.706457	0.0323252	0.974213	0.997509	Btbd2
612.151	-0.328772	0.203278	-1.61735	0.105802	0.65153	Btbd3
50.0767	-0.00858008	0.64632	-0.0132753	0.989408	0.997932	Btbd6
30.8517	0.726824	1.10172	0.659717	0.509436	0.965109	Btbd7
31.6351	-0.704206	0.855827	-0.822837	0.4106	0.939772	Btbd8
112.434	-0.0600068	0.473924	-0.126617	0.899244	0.995542	Btbd9
7.03603	2.81971	1.66262	1.69595	0.0898958	0.613786	Btd
145.49	0.268702	0.361579	0.743135	0.4574	0.950696	Btf3
50.3838	-0.243516	0.589731	-0.412928	0.679659	0.98579	Btf3l4
65.7568	-0.611416	0.544795	-1.12229	0.261741	0.881616	Btg1
23.3135	0.516638	0.932215	0.554205	0.579439	0.979539	Btg2
152.21	0.0165074	0.368467	0.0448002	0.964267	0.995542	Btrc
146.859	-0.14082	0.35818	-0.393155	0.694205	0.98579	Bub3
147.797	-0.214246	0.391311	-0.54751	0.584029	0.979622	Bud31
4.48413	-5.56529	2.64279	-2.10584	0.0352186		Bvht
33.6359	0.103392	0.831809	0.124298	0.90108	0.995542	Bysl
24.1564	-0.680948	0.885568	-0.768939	0.441929	0.948884	Bzrap1
465.636	0.0508909	0.206529	0.24641	0.805365	0.992395	Bzw1
112.842	-0.0781918	0.45273	-0.172712	0.862878	0.995542	Bzw2
7.9564	0.802285	1.53622	0.522244	0.6015	0.984071	C030006K11Rik
20.4995	0.115752	1.15287	0.100403	0.920024	0.995542	C030018K13Rik
15.8874	-0.0401988	1.21359	-0.033124	0.973576	0.997464	C030023E24Rik
40.7551	-1.02834	0.665781	-1.54456	0.122452	0.693717	C030029H02Rik
8.72146	0.236143	1.83987	0.128347	0.897874	0.995542	C030034I22Rik
10.2666	-0.461541	1.46938	-0.314107	0.75344	0.989837	C030037D09Rik
28.6491	0.203184	0.978372	0.207676	0.835482	0.995113	C030039L03Rik
18.4419	-0.403937	0.949195	-0.425557	0.670431	0.98579	C130030K03Rik
10.7869	-2.98515	1.44092	-2.0717	0.0382938	0.427285	C130036L24Rik
37.6995	1.43071	0.764745	1.87084	0.0613679	0.523058	C130071C03Rik
340.553	0.185472	0.252014	0.735959	0.461756	0.952861	C1d
12.362	-1.42295	1.47811	-0.96268	0.335708	0.910508	C1galt1
87.3803	-0.0256454	0.461333	-0.0555898	0.955669	0.995542	C1galt1c1
264.131	2.21905	0.308029	7.20405	5.84498e-13	3.63373e-10	C1qa
375.392	2.38443	0.231045	10.3202	5.70884e-25	1.68582e-21	C1qb
149.505	-0.0618308	0.398903	-0.155002	0.87682	0.995542	C1qbp
556.562	1.90998	0.29687	6.43373	1.24507e-10	4.91688e-08	C1qc
15.058	-0.476725	1.34173	-0.355306	0.72236	0.986136	C1ql1
22.9097	0.368095	1.17413	0.313505	0.753897	0.989888	C1ql2
364.058	0.321313	0.242871	1.32298	0.185843	0.79912	C1ql3
319.229	-0.186194	0.255446	-0.728897	0.466065	0.954042	C1qtnf4
33.6413	-1.1843	0.722066	-1.64016	0.100972	0.642764	C230004F18Rik
5.88212	-0.113459	2.08273	-0.0544762	0.956556	0.995542	C230035I16Rik
5.62395	-1.19858	1.85067	-0.647646	0.517214	0.966856	C230037L18Rik
8.94339	1.86695	1.7456	1.06952	0.284836	0.888289	C230072F16Rik
67.9871	0.842363	0.535065	1.57432	0.115414	0.678713	C230091D08Rik
15.1303	1.12702	1.0875	1.03634	0.300046	0.892925	C2cd2
108.6	-0.452992	0.428005	-1.05838	0.289882	0.888489	C2cd2l
24.5192	0.500203	0.824221	0.606879	0.543931	0.973101	C2cd3
9.77587	1.29014	1.46415	0.881156	0.378234	0.925962	C2cd4b
6.01873	-1.45307	1.84577	-0.787242	0.43114	0.945451	C2cd4c
45.2112	-0.334314	0.702485	-0.475903	0.634144	0.985263	C2cd5
5.89034	6.14444	2.41973	2.53931	0.0111071	0.220871	C3
47.0952	0.45615	0.633937	0.719551	0.471802	0.954845	C330006A16Rik
58.6678	0.117687	0.539228	0.218252	0.827233	0.995113	C330007P06Rik
6.39289	-3.38037	2.06828	-1.63439	0.102178	0.64329	C330013E15Rik
26.6484	-0.653375	0.8777	-0.744417	0.456624	0.950696	C330018D20Rik
17.4636	1.80257	1.20647	1.49409	0.135151	0.714277	C330027C09Rik
34.3975	6.29102	1.14168	5.51031	3.58208e-08	9.00246e-06	C3ar1
120.424	3.01688	0.6272	4.81009	1.50865e-06	0.000254574	C4b
69.5773	0.682026	0.490207	1.3913	0.164134	0.76782	C530008M17Rik
39.4304	0.132933	0.663186	0.200446	0.841132	0.995488	C630043F03Rik
8.61878	-4.16499	1.689	-2.46594	0.0136654	0.252212	C77080
328.619	-0.199042	0.268176	-0.742207	0.457962	0.950747	C77370
40.7794	0.011993	0.888636	0.013496	0.989232	0.997932	C87436
10.7873	0.650548	1.68102	0.386996	0.698759	0.985813	C920006O11Rik
6.56094	-1.6216	1.57083	-1.03232	0.301924	0.894969	C920021L13Rik
55.9289	-0.269408	0.603691	-0.446268	0.655404	0.98579	Caap1
484.118	0.0528087	0.217079	0.24327	0.807796	0.992395	Cab39
79.1529	-0.158485	0.611219	-0.259294	0.795409	0.992395	Cab39l
48.0708	-0.954375	0.854875	-1.11639	0.264254	0.881831	Cabin1
22.8426	1.48662	1.00625	1.47739	0.13957	0.723708	Cables1
22.3867	0.957693	0.933969	1.0254	0.305174	0.896091	Cables2
80.1227	-0.0128513	0.616152	-0.0208574	0.983359	0.997932	Cabp1
44.2129	0.620738	0.924692	0.671292	0.502035	0.964142	Cacfd1
18.3536	-1.30943	1.14506	-1.14355	0.252811	0.87609	Cachd1
88.8797	0.0469206	0.444346	0.105595	0.915904	0.995542	Cacna1a
50.3075	0.72104	0.681039	1.05874	0.28972	0.888489	Cacna1b
60.4775	-0.594497	0.737974	-0.805579	0.420486	0.94223	Cacna1c
60.4527	0.54732	0.541278	1.01116	0.311938	0.900852	Cacna1d
120.288	0.423776	0.446195	0.949756	0.342236	0.914804	Cacna1e
16.9837	2.90494	1.16266	2.49853	0.012471	0.239134	Cacna1g
7.57445	-4.43629	1.83659	-2.4155	0.0157135	0.270505	Cacna1h
22.1821	0.830107	1.2244	0.677971	0.49779	0.964142	Cacna1i
530.771	0.286894	0.188087	1.52533	0.127177	0.703285	Cacna2d1
15.7548	0.518667	1.25625	0.41287	0.679702	0.98579	Cacna2d2
151.701	-0.409229	0.378746	-1.08049	0.279926	0.888289	Cacna2d3
30.5102	0.500263	0.77802	0.642996	0.520227	0.966856	Cacnb1
39.172	-0.0427991	0.640012	-0.0668724	0.946683	0.995542	Cacnb2
66.6704	0.652989	0.51695	1.26316	0.206533	0.826796	Cacnb3
472.065	0.284018	0.202451	1.4029	0.160647	0.759996	Cacnb4
93.1986	0.227905	0.470278	0.484618	0.627947	0.985263	Cacng2
61.2252	0.173006	0.653175	0.26487	0.791109	0.992395	Cacng3
13.8657	-0.485274	1.41773	-0.342288	0.732134	0.988482	Cacng5
23.9127	0.563843	2.59284	0.217462	0.827849	0.995113	Cacng8
6.91835	-0.324078	2.10159	-0.154206	0.877447	0.995542	Cactin
88.2024	-0.0525384	0.47227	-0.111246	0.911421	0.995542	Cacul1
603.373	-0.168244	0.182107	-0.923873	0.355552	0.919672	Cacybp
16.6833	-0.93254	1.58823	-0.587156	0.557099	0.977343	Cad
758.976	0.463311	0.17458	2.65386	0.00795768	0.17904	Cadm1
1144.04	0.338865	0.144523	2.34472	0.0190412	0.302304	Cadm2
68.6636	-0.689999	0.560988	-1.22997	0.218708	0.837399	Cadm3
78.1743	0.0101776	0.456655	0.0222874	0.982219	0.997932	Cadm4
397.682	0.270567	0.211084	1.2818	0.199913	0.819238	Cadps
215.872	-0.595703	0.295884	-2.0133	0.0440832	0.457566	Cadps2
9.32072	-4.6187	2.00748	-2.30074	0.0214062	0.318329	Cage1
16.2489	-0.075385	1.07942	-0.0698381	0.944323	0.995542	Cahm
712.131	-0.651919	0.176346	-3.69681	0.000218326	0.0155353	Calb1
173.109	-0.367581	0.315941	-1.16345	0.244648	0.867965	Calb2
5.86404	-0.633638	2.09393	-0.302607	0.762189	0.991173	Calca
6.69831	-1.71722	2.12425	-0.808385	0.418869	0.94223	Calcb
25.6522	-1.05455	0.853963	-1.23489	0.216872	0.835931	Calcoco1
18.7817	-0.626384	0.938196	-0.667647	0.504359	0.964142	Calcrl
116.726	0.25575	0.438186	0.583655	0.559452	0.977835	Cald1
33965.6	-0.187352	0.0562775	-3.32907	0.000871364	0.0453416	Calm1
8456.06	-0.0674149	0.0863697	-0.780539	0.435074	0.946456	Calm2
1523.6	-0.107106	0.122477	-0.874504	0.381844	0.928407	Calm3
237.506	-0.131082	0.331897	-0.394948	0.692881	0.98579	Caln1
522.036	0.434133	0.191296	2.26944	0.0232418	0.33156	Calr
24.8903	1.21553	0.996795	1.21944	0.222677	0.842873	Calu
673.994	-1.34436	0.178133	-7.54694	4.45618e-14	3.50909e-11	Caly
132.428	0.279908	0.383776	0.729353	0.465786	0.954042	Camk1
299.113	0.479168	0.253671	1.88894	0.0589001	0.517505	Camk1d
18.5559	-1.2125	1.16228	-1.0432	0.296855	0.891855	Camk1g
1748.68	-0.461816	0.165648	-2.78794	0.00530449	0.139859	Camk2a
539.06	0.120522	0.197764	0.609425	0.542243	0.972957	Camk2b
213.765	0.605477	0.316536	1.91282	0.0557708	0.51084	Camk2d
174.512	-0.642018	0.383112	-1.6758	0.0937779	0.628482	Camk2g
2158.43	0.821577	0.131528	6.24638	4.20067e-10	1.53854e-07	Camk2n1
80.2542	0.538989	0.507934	1.06114	0.288626	0.888289	Camk2n2
375.594	-0.0640616	0.226728	-0.282548	0.777523	0.992299	Camk4
91.6281	-0.0416272	0.445475	-0.0934447	0.92555	0.995542	Camkk1
136.356	0.0328256	0.435915	0.0753029	0.939974	0.995542	Camkk2
27.8936	-0.0598967	0.841512	-0.0711774	0.943257	0.995542	Camkmt
249.578	-0.44353	0.281144	-1.57759	0.11466	0.678268	Camkv
194.689	0.128413	0.369532	0.347501	0.728215	0.986884	Caml
113.559	0.162352	0.429048	0.378402	0.705132	0.985965	Camsap1
314.298	-0.259156	0.26361	-0.983103	0.325557	0.906984	Camsap2
12.5946	-1.71621	1.21643	-1.41085	0.158288	0.756655	Camsap3
1009.5	0.534151	0.152098	3.51189	0.000444932	0.0273726	Camta1
30.3109	-0.108184	0.780709	-0.138572	0.889789	0.995542	Camta2
232.223	0.67783	0.301244	2.2501	0.0244424	0.340464	Cand1
28.3969	0.833205	0.867272	0.960719	0.336694	0.910925	Cant1
805.355	0.606966	0.183795	3.30241	0.000958585	0.0492296	Canx
67.3908	0.014869	0.524506	0.0283486	0.977384	0.997641	Cap1
432.729	-0.391584	0.292136	-1.34042	0.18011	0.789117	Cap2
8.37022	3.01853	1.69064	1.78543	0.0741914	0.569427	Capg
9.19344	-0.384684	1.6701	-0.230336	0.817831	0.992726	Capn1
14.7651	-0.771396	1.25243	-0.615921	0.537947	0.971892	Capn10
22.5236	-0.745651	1.02564	-0.727009	0.46722	0.954042	Capn15
47.2576	0.0291599	0.627855	0.0464436	0.962957	0.995542	Capn2
7.08231	-0.36008	1.8902	-0.190498	0.848919	0.995542	Capn5
63.357	0.380956	0.591807	0.643717	0.519759	0.966856	Capn7
293.431	-0.101269	0.241152	-0.419938	0.674531	0.98579	Capns1
405.612	-0.208058	0.206511	-1.00749	0.3137	0.901907	Caprin1
9.73745	1.11781	1.94502	0.574705	0.565491	0.9788	Caprin2
31.8795	1.57906	0.874301	1.80608	0.0709058	0.560366	Capsl
25.1248	0.584148	0.929896	0.628187	0.529882	0.96948	Capza1
708.777	-0.0469991	0.180815	-0.259929	0.794919	0.992395	Capza2
377.289	-0.098428	0.254217	-0.387181	0.698622	0.985813	Capzb
84.7074	-0.222024	0.47254	-0.469852	0.638461	0.985263	Car10
152.419	0.269711	0.336161	0.802325	0.422365	0.94223	Car11
18.6903	-1.48028	1.19681	-1.23685	0.216143	0.83559	Car12
5.63516	-4.89704	2.34189	-2.09106	0.0365226	0.416445	Car13
16.8402	1.75266	1.05206	1.66594	0.0957251	0.632581	Car14
1122.16	-0.245013	0.159683	-1.53437	0.124939	0.698793	Car2
36.3274	-0.886933	0.846169	-1.04817	0.294558	0.889939	Car4
11.2227	1.66331	1.72077	0.966603	0.333743	0.910279	Car5b
6.76261	-1.48331	1.78459	-0.831174	0.405875	0.939239	Car7
11.6558	1.00348	1.17315	0.855373	0.392344	0.932863	Car8
10.4035	0.247682	1.49618	0.165544	0.868516	0.995542	Card6
35.79	0.675092	0.692689	0.974597	0.32976	0.907536	Carf
38.1712	0.406138	0.724514	0.560566	0.575094	0.9788	Carhsp1
97.655	-0.265752	0.436572	-0.608725	0.542707	0.973031	Carkd
35.413	-1.00589	0.725957	-1.3856	0.165868	0.771497	Carm1
54.0807	-0.164138	0.575511	-0.285203	0.775488	0.992096	Cars
35.2735	0.00239754	0.785512	0.0030522	0.997565	0.999735	Cars2
29.156	-1.62889	0.980424	-1.66141	0.0966312	0.634112	Cartpt
34.3116	0.729314	0.822529	0.886672	0.375256	0.925962	Casc3
478.939	-0.329092	0.228581	-1.43972	0.149947	0.741307	Casc4
214.628	-0.0500496	0.355095	-0.140947	0.887912	0.995542	Casd1
130.648	0.239358	0.363631	0.658243	0.510382	0.965262	Cask
63.5129	0.13494	0.580461	0.232471	0.816172	0.992395	Caskin1
10.5311	-1.45531	1.90109	-0.765514	0.443966	0.949273	Caskin2
14.1804	0.211264	1.05043	0.201122	0.840604	0.995488	Casp1
8.48508	0.248501	1.66781	0.148999	0.881555	0.995542	Casp2
30.3682	-0.276665	0.751284	-0.368257	0.712682	0.985965	Casp3
8.22882	6.62563	2.21735	2.98809	0.00280726	0.0965216	Casp4
10.2089	1.54255	1.70796	0.903156	0.366443	0.925368	Casp6
81.7663	0.774751	0.540769	1.43268	0.151948	0.745664	Casp8ap2
12.0595	-0.179737	1.60034	-0.112312	0.910576	0.995542	Casp9
29.6857	0.915282	0.763299	1.19911	0.230484	0.852907	Cast
10.3372	0.141648	1.8278	0.0774963	0.938229	0.995542	Casz1
48.8539	0.563028	0.607145	0.927338	0.353751	0.919523	Cat
6.13939	4.42649	2.54634	1.73837	0.0821452	0.590565	Catsper2
11.4823	-1.3337	1.37624	-0.969092	0.332499	0.909676	Cav1
87.3013	0.340479	0.514226	0.662119	0.507895	0.964641	Cav2
7.26027	0.913133	2.10287	0.434231	0.664121	0.98579	Cav3
56.6618	-0.212947	0.589012	-0.361534	0.717701	0.985965	Cbfa2t2
76.995	0.296008	0.538547	0.549642	0.582565	0.979539	Cbfa2t3
41.4766	0.5492	0.667274	0.82305	0.410479	0.939772	Cbfb
79.8944	0.0422194	0.501422	0.0841993	0.932898	0.995542	Cbl
43.4033	-0.249002	0.619195	-0.402138	0.687583	0.98579	Cblb
77.748	0.492251	0.551902	0.891918	0.372437	0.925962	Cbll1
12.7368	-0.459305	1.49205	-0.307836	0.758207	0.990738	Cbln1
39.9767	0.428372	0.76751	0.558132	0.576755	0.979033	Cbln2
31.5219	-0.288835	0.81183	-0.355783	0.722003	0.986136	Cbln4
115.456	-0.236019	0.450453	-0.52396	0.600306	0.983837	Cbr1
19.1082	0.431391	1.08368	0.398078	0.690573	0.98579	Cbr3
28.3834	-0.48332	0.806889	-0.598992	0.549178	0.974864	Cbr4
12.9614	-0.218302	1.33669	-0.163315	0.870271	0.995542	Cbs
60.9473	0.515237	0.661096	0.779368	0.435763	0.946783	Cbwd1
136.747	-0.965276	0.40292	-2.3957	0.0165887	0.277151	Cbx1
83.7631	-0.321211	0.483474	-0.664381	0.506446	0.964409	Cbx3
45.3576	0.157293	0.754274	0.208536	0.834811	0.995113	Cbx4
974.362	0.0730608	0.193904	0.376788	0.706331	0.985965	Cbx5
104.986	0.132207	0.407255	0.324629	0.745462	0.989837	Cbx6
37.5248	-0.648988	0.779262	-0.832824	0.404944	0.939239	Cbx7
11.1595	1.19824	1.46917	0.81559	0.414735	0.939772	Cbx8
53.4071	-0.482417	0.588737	-0.819411	0.412552	0.939772	Cby1
21.4526	0.588726	1.06888	0.550788	0.581779	0.979539	Cc2d1a
128.362	0.382705	0.431573	0.886768	0.375204	0.925962	Cc2d2a
162.985	0.0675892	0.395962	0.170696	0.864463	0.995542	Ccar1
12.1666	-0.538047	1.12383	-0.478763	0.632107	0.985263	Ccar2
29.4939	0.0432117	0.80758	0.0535077	0.957327	0.995542	Ccbe1
6.43685	-6.08257	2.70566	-2.2481	0.0245701	0.34184	Ccbl1
6.69166	-0.329148	1.92125	-0.17132	0.863972	0.995542	Ccbl2
21.575	0.235373	0.875197	0.268937	0.787978	0.992395	Ccdc101
45.9173	-1.00331	0.835109	-1.20141	0.229591	0.851469	Ccdc106
214.805	-0.215163	0.295964	-0.726989	0.467233	0.954042	Ccdc107
15.7364	-0.633145	1.28454	-0.492894	0.622087	0.985187	Ccdc108
6.92804	-0.542549	1.71409	-0.316523	0.751605	0.989837	Ccdc109b
61.3563	-0.104724	0.55529	-0.188594	0.850411	0.995542	Ccdc112
20.8024	0.442704	0.940551	0.470686	0.637865	0.985263	Ccdc113
28.4426	-2.01538	0.827277	-2.43616	0.0148442	0.262092	Ccdc115
12.7406	0.422199	1.11367	0.379106	0.704609	0.985965	Ccdc117
67.3879	0.00633025	0.524697	0.0120646	0.990374	0.997932	Ccdc12
17.2395	1.9658	1.2674	1.55104	0.120891	0.68984	Ccdc122
465.276	-0.130281	0.227406	-0.572903	0.56671	0.9788	Ccdc124
7.0159	2.20077	1.52243	1.44556	0.1483	0.736944	Ccdc125
27.1153	-0.678341	1.09432	-0.619873	0.535342	0.970966	Ccdc126
263.901	-0.48005	0.265747	-1.80642	0.0708534	0.560366	Ccdc127
5.99685	1.30615	2.21314	0.59018	0.55507	0.976997	Ccdc13
37.722	-0.565581	0.828439	-0.682707	0.494792	0.961487	Ccdc130
119.714	0.468282	0.486063	0.963418	0.335338	0.910508	Ccdc132
94.1682	0.46537	0.524366	0.887491	0.374814	0.925962	Ccdc136
37.1211	-1.19267	0.786153	-1.5171	0.129242	0.707743	Ccdc137
6.47827	-2.54714	2.14827	-1.18567	0.235751	0.856805	Ccdc138
5.9934	1.38162	1.99594	0.692218	0.488801	0.958887	Ccdc146
69.2263	1.00552	0.644592	1.55993	0.118776	0.686471	Ccdc148
45.6179	-1.14803	0.634169	-1.81029	0.0702513	0.558794	Ccdc149
23.1311	-0.956056	0.850877	-1.12361	0.261177	0.881616	Ccdc15
32.6474	1.33386	0.8936	1.49268	0.135521	0.714356	Ccdc153
7.78815	-2.45619	1.58259	-1.55201	0.120661	0.689532	Ccdc157
6.79469	-0.740667	1.81301	-0.408529	0.682885	0.98579	Ccdc162
121.055	0.345047	0.374956	0.920232	0.357451	0.921321	Ccdc167
31.1376	-1.7033	0.994037	-1.71352	0.0866172	0.604682	Ccdc171
30.1083	-1.438	0.78898	-1.8226	0.0683634	0.550552	Ccdc173
147.213	0.234536	0.39101	0.599821	0.548626	0.974864	Ccdc174
46.9947	-0.0359057	0.674684	-0.0532186	0.957558	0.995542	Ccdc176
19.5465	0.0792177	1.01417	0.0781105	0.93774	0.995542	Ccdc177
16.2545	-0.451835	1.28296	-0.352182	0.724702	0.986629	Ccdc18
60.5656	-1.15006	0.740957	-1.55213	0.12063	0.689532	Ccdc181
26.6996	0.120814	1.17123	0.103151	0.917843	0.995542	Ccdc184
142.911	-0.208723	0.381253	-0.547465	0.584059	0.979622	Ccdc186
21.9245	0.462746	1.22865	0.376631	0.706448	0.985965	Ccdc22
71.647	-0.466579	0.495779	-0.941103	0.346652	0.916439	Ccdc23
181.32	-1.12231	0.31917	-3.51636	0.000437513	0.0270571	Ccdc25
68.9491	-0.625308	0.490578	-1.27464	0.202438	0.821229	Ccdc28a
30.8903	-1.64219	0.753861	-2.17837	0.0293787	0.374349	Ccdc28b
7.99501	0.0956734	1.73082	0.0552764	0.955918	0.995542	Ccdc3
26.7223	0.0250137	0.868251	0.0288093	0.977017	0.997641	Ccdc30
121.065	0.463621	0.437504	1.0597	0.289283	0.888489	Ccdc32
192.918	-0.0411907	0.30495	-0.135074	0.892554	0.995542	Ccdc34
6.87609	4.44922	1.81645	2.4494	0.0143095	0.257267	Ccdc38
76.2684	0.250023	0.494318	0.505795	0.613001	0.985187	Ccdc39
97.5476	-0.712519	0.520672	-1.36846	0.171168	0.778228	Ccdc43
344.117	-0.130627	0.259679	-0.503032	0.614942	0.985187	Ccdc47
167.635	0.205858	0.351736	0.585262	0.558371	0.977835	Ccdc50
6.2517	-6.04478	2.16351	-2.79397	0.00520654	0.138508	Ccdc51
56.4897	0.0743902	0.685886	0.108459	0.913632	0.995542	Ccdc53
135.24	0.219108	0.38803	0.564669	0.572299	0.9788	Ccdc55
45.3775	-0.456527	0.697522	-0.654498	0.512791	0.965959	Ccdc58
185.797	-0.0686899	0.343626	-0.199897	0.841561	0.995488	Ccdc59
87.0703	-0.478237	0.623812	-0.766636	0.443298	0.949273	Ccdc6
24.0999	-0.524233	0.919193	-0.570319	0.568461	0.9788	Ccdc61
5.12418	-0.683594	2.62842	-0.260077	0.794804		Ccdc64
7.30876	-2.29924	1.67042	-1.37645	0.168684	0.774791	Ccdc65
54.1844	0.816049	0.614102	1.32885	0.183898	0.797035	Ccdc66
14.2877	-1.53888	1.08874	-1.41345	0.157523	0.755631	Ccdc71
57.2237	-0.943025	0.550457	-1.71317	0.0866816	0.604774	Ccdc71l
61.8762	-0.214262	0.605755	-0.353711	0.723556	0.986456	Ccdc74a
15.0994	1.71586	1.29648	1.32348	0.185676	0.79912	Ccdc77
7.76392	0.617805	1.54447	0.40001	0.689149	0.98579	Ccdc80
53.3886	-0.121232	0.634312	-0.191124	0.848428	0.995542	Ccdc82
27.6373	0.750876	0.956811	0.78477	0.432589	0.945451	Ccdc84
117.241	0.483336	0.439463	1.09983	0.271406	0.88542	Ccdc85a
90.499	-0.51994	0.52777	-0.985163	0.324544	0.906822	Ccdc85b
16.7146	1.1152	1.31122	0.850503	0.395046	0.934203	Ccdc86
5.18568	-0.374784	2.64	-0.141964	0.887109		Ccdc87
644.05	0.529634	0.223607	2.36859	0.0178558	0.290114	Ccdc88a
10.6489	-0.0796177	1.57885	-0.0504277	0.959782	0.995542	Ccdc88b
15.1561	1.78695	1.32133	1.35239	0.176251	0.786043	Ccdc9
72.5177	-0.815469	0.52447	-1.55484	0.119983	0.689532	Ccdc90b
69.3596	-0.469813	0.545749	-0.860859	0.389316	0.931365	Ccdc91
69.387	-0.488743	0.571905	-0.854588	0.392779	0.93294	Ccdc92
26.4278	0.255456	0.805737	0.317047	0.751208	0.989837	Ccdc93
15.4118	1.09834	1.69735	0.647091	0.517573	0.966856	Ccdc94
5.23142	0.281517	2.16547	0.130002	0.896564		Ccdc96
21.8181	0.426526	0.86318	0.494133	0.621212	0.985187	Ccdc97
1218.68	-0.578859	0.141084	-4.10295	4.07916e-05	0.00458886	Cck
20.6534	0.632687	0.939863	0.673169	0.50084	0.964142	Cckbr
26.9129	4.90484	1.14554	4.28168	1.85483e-05	0.00243437	Ccl12
10.6772	-0.924644	1.44085	-0.641735	0.521045	0.966856	Ccl17
27.117	-1.29804	1.22581	-1.05892	0.289634	0.888489	Ccl25
304.985	-0.270209	0.290195	-0.931127	0.351788	0.917455	Ccl27a
12.7205	7.255	1.68528	4.30491	1.67051e-05	0.00226805	Ccl3
27.8684	8.38643	1.44726	5.79471	6.84374e-09	1.92472e-06	Ccl4
92.7839	3.4592	0.653134	5.29631	1.18168e-07	2.63358e-05	Ccl6
60.7819	-0.918747	0.652512	-1.40802	0.159126	0.75808	Ccm2
151.223	0.54444	0.369847	1.47207	0.141003	0.727107	Ccnc
108.627	0.310762	0.472968	0.657047	0.511151	0.965262	Ccnd1
359.686	0.234995	0.234278	1.00306	0.315831	0.902498	Ccnd2
16.4401	-0.0470951	1.17429	-0.0401051	0.968009	0.995964	Ccnd3
120.336	0.0205048	0.463227	0.0442651	0.964693	0.995542	Ccndbp1
23.4878	0.143651	0.814722	0.176319	0.860044	0.995542	Ccne1
16.9324	1.38111	1.04039	1.32749	0.184347	0.797035	Ccne2
182.786	-0.220019	0.524587	-0.419414	0.674914	0.98579	Ccng1
45.012	-0.336683	0.763613	-0.440909	0.659279	0.98579	Ccng2
266.55	-0.202523	0.32964	-0.614378	0.538966	0.971981	Ccnh
439.591	0.194414	0.235506	0.825514	0.40908	0.939539	Ccni
5.82295	-0.514159	2.29067	-0.224458	0.822401	0.992853	Ccnj
12.4762	0.169202	1.43985	0.117513	0.906453	0.995542	Ccnjl
32.5063	0.233553	1.03914	0.224755	0.82217	0.992853	Ccnk
99.7063	0.174704	0.477547	0.365836	0.714488	0.985965	Ccnl1
69.8124	0.170403	0.480016	0.354995	0.722593	0.986136	Ccnl2
15.2003	-0.550253	1.04301	-0.527565	0.597802	0.982811	Ccnt1
28.0802	-1.84038	0.934809	-1.96872	0.0489854	0.480139	Ccnt2
54.3168	0.108169	0.59532	0.181698	0.855819	0.995542	Ccny
16.4502	-1.25757	1.35026	-0.931352	0.351671	0.917455	Ccnyl1
108.832	-0.170286	0.407017	-0.418376	0.675672	0.98579	Ccp110
186.471	0.037902	0.298223	0.127093	0.898867	0.995542	Ccpg1
73.4621	-0.27096	0.576402	-0.470089	0.638291	0.985263	Ccpg1os
80.377	-0.0180807	0.489383	-0.0369459	0.970528	0.996859	Ccrn4l
21.6946	-0.338764	1.00893	-0.335767	0.737046	0.989099	Ccs
71.4409	0.0267785	0.517438	0.051752	0.958726	0.995542	Ccsap
19.0888	1.12668	1.07518	1.04789	0.294688	0.889939	Ccser1
354.976	0.0865055	0.240413	0.359821	0.718981	0.985965	Ccser2
385.696	-0.0306692	0.22201	-0.138143	0.890127	0.995542	Cct2
216.559	0.17477	0.330216	0.52926	0.596625	0.982811	Cct3
296.416	0.114393	0.252625	0.452817	0.65068	0.98579	Cct4
512.579	0.0561077	0.229937	0.244013	0.80722	0.992395	Cct5
547.757	-0.127878	0.190947	-0.669705	0.503046	0.964142	Cct6a
622.699	-0.0861888	0.200363	-0.430164	0.667077	0.98579	Cct7
402.644	0.0168998	0.217756	0.0776088	0.938139	0.995542	Cct8
100.917	-0.24983	0.406405	-0.614732	0.538732	0.971981	Ccz1
22.3117	1.9174	1.24648	1.53826	0.123986	0.697389	Cd14
19.5384	-0.147853	1.02753	-0.143892	0.885586	0.995542	Cd151
99.604	-0.167701	0.437207	-0.383573	0.701295	0.985813	Cd164
5.40846	6.02569	2.24206	2.68757	0.00719735		Cd180
196.076	-0.0261815	0.290418	-0.0901511	0.928167	0.995542	Cd200
14.053	-1.02699	1.11273	-0.922945	0.356036	0.919777	Cd24a
70.1987	-0.235193	0.595206	-0.395145	0.692736	0.98579	Cd2ap
35.9397	0.148103	0.745281	0.198722	0.842481	0.995488	Cd2bp2
66.6031	0.0688497	0.510186	0.13495	0.892651	0.995542	Cd302
42.4489	-0.39805	0.826266	-0.481745	0.629987	0.985263	Cd320
26.416	0.886035	0.898153	0.986507	0.323884	0.906822	Cd34
7.74785	-1.41839	1.58976	-0.892206	0.372282	0.925962	Cd36
7.10986	1.63091	1.90138	0.857751	0.39103	0.932158	Cd37
6.60109	2.36245	1.84447	1.28083	0.200254	0.819428	Cd38
50.5972	-0.0207336	0.608409	-0.0340784	0.972815	0.99745	Cd3eap
12.5993	1.82164	1.42688	1.27666	0.201723	0.820584	Cd44
9.13217	1.5647	1.70202	0.919323	0.357927	0.921321	Cd46
331.503	0.371199	0.291951	1.27144	0.203571	0.822196	Cd47
87.877	2.91744	0.467329	6.24279	4.29831e-10	1.53854e-07	Cd52
101.794	4.05292	0.5418	7.48048	7.40534e-14	5.46699e-11	Cd53
14.0775	0.105064	1.15661	0.0908378	0.927621	0.995542	Cd55
26.6144	0.0863454	0.975974	0.088471	0.929502	0.995542	Cd59a
386.564	1.16663	0.231587	5.03755	4.71518e-07	8.91038e-05	Cd63
88.5478	1.54702	0.511879	3.02224	0.00250908	0.0903576	Cd68
11.065	7.05441	1.75406	4.02176	5.77644e-05	0.00578231	Cd74
1476.98	0.304102	0.137433	2.21273	0.0269164	0.355237	Cd81
5.40567	0.600614	2.30751	0.260287	0.794643		Cd82
39.81	0.441553	0.9103	0.485064	0.627631	0.985263	Cd83
18.3837	3.04983	1.24055	2.45846	0.0139535	0.25435	Cd84
15.7793	1.91502	1.20351	1.5912	0.111564	0.668454	Cd86
314.085	1.11531	0.293031	3.80612	0.000141165	0.0112665	Cd9
117.47	0.277687	0.385451	0.720421	0.471266	0.954845	Cd99l2
176.843	0.204882	0.366708	0.558707	0.576362	0.979033	Cdadc1
10.4862	0.891373	1.29964	0.685862	0.4928	0.961202	Cdan1
215.753	-0.29892	0.307456	-0.972235	0.330934	0.909209	Cdc123
16.2278	-1.0219	1.24	-0.824115	0.409874	0.939772	Cdc14a
18.8697	1.83599	1.14022	1.6102	0.107354	0.656009	Cdc14b
158.75	0.236841	0.386163	0.613319	0.539665	0.971981	Cdc16
63.5397	-0.504356	0.565354	-0.892107	0.372336	0.925962	Cdc23
9.00644	0.322474	1.52434	0.211551	0.832458	0.995113	Cdc25a
18.0471	-1.27508	1.07396	-1.18727	0.235122	0.856537	Cdc25b
58.4229	0.315932	0.610338	0.517635	0.604713	0.984071	Cdc26
141.363	0.15876	0.352063	0.450943	0.652031	0.98579	Cdc27
116.272	0.453098	0.461205	0.982422	0.325892	0.907031	Cdc34
214.711	0.142987	0.301851	0.4737	0.635714	0.985263	Cdc37
288.348	-0.117699	0.273367	-0.430553	0.666793	0.98579	Cdc37l1
274.987	-0.263016	0.245897	-1.06962	0.284792	0.888289	Cdc40
1174.9	-0.0895292	0.16935	-0.528665	0.597038	0.982811	Cdc42
525.653	0.257211	0.230013	1.11825	0.263462	0.881783	Cdc42bpa
74.6188	-1.11004	0.533061	-2.08239	0.0373067	0.421287	Cdc42bpb
14.8812	-0.429565	1.38359	-0.310472	0.756202	0.990236	Cdc42ep1
5.49141	-0.61723	1.6359	-0.377303	0.705948		Cdc42ep2
28.7503	-1.08839	0.77873	-1.39765	0.162217	0.763999	Cdc42ep3
15.0347	-0.918263	1.29075	-0.711421	0.476824	0.954845	Cdc42ep4
82.5474	0.00891467	0.512546	0.0173929	0.986123	0.997932	Cdc42se1
198.899	-0.201903	0.360671	-0.559798	0.575617	0.9788	Cdc42se2
168.354	0.220163	0.38287	0.575035	0.565268	0.9788	Cdc5l
7.74568	-0.632819	1.38588	-0.45662	0.647944	0.985614	Cdc7
52.6263	0.960445	0.67857	1.4154	0.156953	0.754402	Cdc73
5.79096	-0.800199	2.54429	-0.314508	0.753135	0.989837	Cdca4
7.56646	-6.3185	2.0185	-3.13029	0.00174632	0.0726322	Cdca8
48.2767	0.437366	0.665066	0.657629	0.510777	0.965262	Cdh10
193.757	0.288228	0.325261	0.886143	0.37554	0.925962	Cdh11
57.142	1.09318	0.576042	1.89774	0.057731	0.513106	Cdh12
107.872	0.235185	0.454834	0.517078	0.605102	0.984071	Cdh13
18.9232	0.215802	0.93927	0.229754	0.818283	0.992764	Cdh18
8.63207	0.536627	1.74626	0.307301	0.758615	0.990738	Cdh19
175.172	-0.325007	0.312996	-1.03837	0.299096	0.892925	Cdh2
15.8444	3.49621	1.31059	2.66765	0.00763843	0.174248	Cdh20
16.6332	-1.09716	1.32874	-0.825716	0.408965	0.939458	Cdh4
22.7078	0.344196	1.14428	0.300797	0.763569	0.991173	Cdh7
168.564	0.606222	0.338043	1.79333	0.0729201	0.566876	Cdh8
67.2517	-0.723758	0.639439	-1.13186	0.257692	0.879472	Cdh9
8.53307	-0.228057	1.77689	-0.128346	0.897875	0.995542	Cdhr3
228.975	-0.0423025	0.302612	-0.139791	0.888825	0.995542	Cdip1
124.649	-0.0885795	0.47558	-0.186256	0.852244	0.995542	Cdipt
28.3529	0.733374	0.95996	0.763963	0.444889	0.949273	Cdk10
110.598	0.0989615	0.38686	0.255807	0.7981	0.992395	Cdk11b
74.3587	0.27551	0.515509	0.534443	0.593035	0.981908	Cdk12
164.46	0.222362	0.398706	0.55771	0.577043	0.979033	Cdk13
736.809	0.285237	0.168395	1.69385	0.0902929	0.61543	Cdk14
42.3549	0.191185	0.607411	0.314754	0.752948	0.989837	Cdk16
238.542	0.0348096	0.274852	0.126649	0.899219	0.995542	Cdk17
16.8019	-0.166499	1.02564	-0.162337	0.87104	0.995542	Cdk18
67.9813	0.399821	0.557242	0.7175	0.473066	0.954845	Cdk19
32.6258	-0.396453	0.692078	-0.572845	0.56675	0.9788	Cdk2ap1
86.8647	-1.22675	0.534228	-2.29631	0.0216582	0.319783	Cdk2ap2
165.533	-0.257185	0.346382	-0.742488	0.457792	0.950747	Cdk4
151.688	-0.0452376	0.381047	-0.118719	0.905498	0.995542	Cdk5
353.304	0.485711	0.228622	2.12452	0.033627	0.403619	Cdk5r1
31.5903	-0.0289061	0.778101	-0.0371495	0.970366	0.996779	Cdk5r2
15.8206	0.194524	1.04962	0.185327	0.852973	0.995542	Cdk5rap1
33.7621	0.201317	0.773905	0.260131	0.794763	0.992395	Cdk5rap2
51.7957	0.671149	0.781132	0.8592	0.39023	0.93138	Cdk5rap3
143.555	0.189969	0.374931	0.506677	0.612381	0.985187	Cdk7
33.9395	-0.405441	0.676898	-0.598969	0.549194	0.974864	Cdk8
30.1105	0.753059	0.866232	0.86935	0.384656	0.930676	Cdk9
49.408	0.0672197	0.645073	0.104205	0.917007	0.995542	Cdkal1
32.8537	-0.530366	0.948056	-0.559425	0.575872	0.9788	Cdkl1
200.164	0.136262	0.374977	0.363388	0.716315	0.985965	Cdkl2
14.3234	-0.617537	1.40349	-0.440001	0.659936	0.98579	Cdkl3
26.378	-0.370538	0.804954	-0.460322	0.645285	0.985263	Cdkl4
213.377	-0.0274889	0.32329	-0.0850286	0.932239	0.995542	Cdkl5
30.1457	-0.970256	0.95995	-1.01074	0.312142	0.900852	Cdkn1a
207.722	1.63793	0.324314	5.05045	4.40768e-07	8.53501e-05	Cdkn1b
[truncated: 10,048 more rows]

## Sheet: 5xFAD vs WT_males
baseMean	log2FoldChange	lfcSE	stat	pvalue	padj	GENE
255.648	0.15928	0.43803	0.363628	0.716136	0.999974	0610007P14Rik
253.381	-0.0134108	0.324203	-0.0413655	0.967005	0.999974	0610009B22Rik
21.5438	0.648397	1.41735	0.457472	0.647332	0.999974	0610009L18Rik
15.6726	-1.37238	1.37251	-0.999906	0.317356	0.999974	0610009O20Rik
172.702	0.0562228	0.389168	0.144469	0.88513	0.999974	0610010F05Rik
109.314	0.626164	0.46833	1.33701	0.181218	0.999974	0610010K14Rik
191.743	0.107202	0.367641	0.291595	0.770596	0.999974	0610011F06Rik
375.399	0.00806963	0.315291	0.0255942	0.979581	0.999974	0610012G03Rik
25.7591	1.1779	1.16053	1.01497	0.310122	0.999974	0610030E20Rik
149.254	-0.153285	0.417781	-0.366902	0.713692	0.999974	0610037L13Rik
15.254	0.536394	1.56428	0.342902	0.731672	0.999974	0610040B10Rik
16.6729	1.3807	1.40638	0.981739	0.326229	0.999974	0610043K17Rik
195.276	0.44584	0.388229	1.14839	0.250806	0.999974	1110001J03Rik
22.0126	0.113062	1.07252	0.105417	0.916045	0.999974	1110002L01Rik
167.166	-0.446553	0.445968	-1.00131	0.316676	0.999974	1110004E09Rik
872.145	0.0904488	0.202844	0.445903	0.655667	0.999974	1110004F10Rik
36.7685	2.05026	0.919824	2.22897	0.0258158	0.552158	1110007C09Rik
280.721	0.334126	0.316191	1.05672	0.290639	0.999974	1110008F13Rik
13.5792	-0.958395	1.32049	-0.725784	0.467971	0.999974	1110008L16Rik
571.083	0.259732	0.256761	1.01157	0.311743	0.999974	1110008P14Rik
61.159	-0.305395	0.636604	-0.479725	0.631423	0.999974	1110012L19Rik
29.8444	0.868184	1.10687	0.784362	0.432828	0.999974	1110017D15Rik
9.15804	1.6259	2.11899	0.767301	0.442902	0.999974	1110019D14Rik
6.25094	0.700637	2.39721	0.292272	0.770078	0.999974	1110020A21Rik
165.854	-0.2426	0.394572	-0.614842	0.538659	0.999974	1110032A03Rik
19.8218	2.86068	1.39208	2.05497	0.0398818	0.649434	1110032F04Rik
40.1155	0.788817	0.886715	0.889595	0.373684	0.999974	1110034G24Rik
74.4196	-0.0337078	0.579864	-0.0581306	0.953645	0.999974	1110037F02Rik
36.9622	-0.660722	0.798365	-0.827594	0.4079	0.999974	1110038B12Rik
51.0384	0.250162	0.691892	0.361561	0.71768	0.999974	1110038F14Rik
9.06946	-0.1127	1.94695	-0.0578853	0.95384	0.999974	1110046J04Rik
115.536	0.796255	0.493341	1.614	0.106527	0.885159	1110051M20Rik
108.277	0.0888199	0.502352	0.176808	0.859659	0.999974	1110059E24Rik
126.586	0.469727	0.480174	0.978244	0.327954	0.999974	1110059G10Rik
475.541	0.434118	0.265608	1.63443	0.102168	0.876166	1110065P20Rik
76.3523	0.297167	0.611589	0.485894	0.627043	0.999974	1190002N15Rik
32.3302	0.296691	0.887144	0.334434	0.738052	0.999974	1190007I07Rik
27.135	0.583437	0.915261	0.637455	0.523829	0.999974	1200014J11Rik
31.2773	-0.517661	1.0766	-0.480828	0.630639	0.999974	1300002E11Rik
22.4326	0.0185966	1.15531	0.0160967	0.987157	0.999974	1500004A13Rik
72.5729	0.102033	0.626291	0.162917	0.870584	0.999974	1500009C09Rik
47.2307	-0.967878	0.71473	-1.35419	0.175677	0.999974	1500009L16Rik
286.6	0.104517	0.333554	0.313344	0.754019	0.999974	1500011B03Rik
362.84	0.0232269	0.301757	0.0769721	0.938646	0.999974	1500011K16Rik
71.1395	0.605885	0.61371	0.987249	0.32352	0.999974	1500012F01Rik
21.5077	-1.39663	1.11241	-1.25549	0.209299	0.999974	1500015O10Rik
67.7289	0.423439	0.615768	0.68766	0.491667	0.999974	1500026H17Rik
6.15209	0.48026	2.73664	0.175492	0.860693	0.999974	1600002H07Rik
12.1841	-0.900076	1.72793	-0.520898	0.602438	0.999974	1600002K03Rik
28.9689	-0.613814	0.945504	-0.649192	0.516214	0.999974	1600012H06Rik
37.5183	0.749856	0.907655	0.826147	0.408721	0.999974	1600014C10Rik
29.5962	-0.0111559	0.900582	-0.0123874	0.990117	0.999974	1600020E01Rik
5.60158	-1.12578	2.55245	-0.441058	0.659171	0.999974	1700001C02Rik
4.8265	-1.27817	2.9286	-0.436445	0.662514	0.999974	1700001G17Rik
7.22292	0.193196	2.39401	0.0806998	0.935681	0.999974	1700001L05Rik
66.4862	0.247519	0.686474	0.360566	0.718424	0.999974	1700001L19Rik
9.30474	-2.03619	2.02025	-1.00789	0.313506	0.999974	1700001O22Rik
15.3966	2.81798	1.512	1.86374	0.0623576	0.750841	1700003M07Rik
10.4683	1.96546	1.5566	1.26266	0.20671	0.999974	1700007G11Rik
12.3086	-0.600159	1.71011	-0.350948	0.725628	0.999974	1700007K13Rik
5.84302	-0.0191104	2.25306	-0.00848198	0.993232	0.999974	1700010K23Rik
5.85101	-1.48805	2.52508	-0.589308	0.555655	0.999974	1700012B09Rik
6.92556	3.05435	2.26388	1.34916	0.177284	0.999974	1700012D01Rik
15.0747	-3.03042	1.67136	-1.81314	0.0698096	0.772254	1700016K19Rik
13.772	-1.09551	1.50799	-0.726475	0.467547	0.999974	1700017B05Rik
27.8257	-1.34996	0.922276	-1.46372	0.143269	0.960193	1700019D03Rik
12.1959	1.62671	1.61091	1.00981	0.312587	0.999974	1700019G17Rik
7.67257	6.32668	2.61651	2.41799	0.0156067	0.435361	1700019L03Rik
811.136	-0.137662	0.2348	-0.586293	0.557679	0.999974	1700020I14Rik
195.411	0.44175	0.403253	1.09547	0.273312	0.999974	1700021F05Rik
19.2195	0.57577	1.25454	0.458949	0.646271	0.999974	1700021K19Rik
16.5279	3.90675	1.43575	2.72105	0.00650756	0.276652	1700024P16Rik
249.857	-0.039423	0.375625	-0.104953	0.916413	0.999974	1700025G04Rik
6.37925	-5.36175	2.32085	-2.31025	0.0208742	0.503764	1700028P14Rik
8.08851	-0.798025	1.87527	-0.425552	0.670434	0.999974	1700029J07Rik
13.8982	0.469845	1.59526	0.294525	0.768357	0.999974	1700030J22Rik
5.55336	0.0582896	2.47845	0.0235186	0.981237	0.999974	1700030K09Rik
94.2003	-0.23235	0.644482	-0.360523	0.718456	0.999974	1700037H04Rik
11.0564	0.345957	1.70172	0.203299	0.838902	0.999974	1700047M11Rik
9.26122	-3.61594	2.16253	-1.67209	0.0945066	0.853781	1700048O20Rik
9.72619	-1.25363	1.75056	-0.716132	0.47391	0.999974	1700049G17Rik
4.92489	-0.407755	2.36055	-0.172737	0.862858	0.999974	1700063D05Rik
46.1606	0.314051	0.831808	0.377552	0.705763	0.999974	1700066M21Rik
10.6609	-2.41007	1.75196	-1.37564	0.168933	0.994189	1700084C01Rik
193.806	0.102846	0.412268	0.249463	0.803003	0.999974	1700086L19Rik
20.7572	0.269799	1.12005	0.240881	0.809648	0.999974	1700086O06Rik
12.026	1.45895	1.75004	0.833666	0.404469	0.999974	1700088E04Rik
34.0899	0.724113	0.897279	0.80701	0.419661	0.999974	1700094D03Rik
27.1554	1.06221	1.32343	0.802614	0.422198	0.999974	1700096K18Rik
11.0968	-0.239815	1.43295	-0.167358	0.867089	0.999974	1700101I11Rik
8.86028	-2.31623	1.81525	-1.27599	0.20196	0.999974	1700113A16Rik
11.8887	-2.35209	1.85417	-1.26854	0.204606	0.999974	1700123M08Rik
80.0568	0.859288	0.589673	1.45723	0.145054	0.962358	1700123O20Rik
5.36228	-1.01478	2.83395	-0.358079	0.720284	0.999974	1810007D17Rik
15.6455	1.69747	1.49368	1.13643	0.255776	0.999974	1810010H24Rik
5.87431	0.189742	2.54018	0.0746962	0.940456	0.999974	1810011O10Rik
132.153	0.403626	0.492036	0.820319	0.412034	0.999974	1810013L24Rik
5.96463	2.03862	2.21143	0.921854	0.356604	0.999974	1810014B01Rik
319.853	0.553182	0.300344	1.84183	0.0655003	0.75841	1810022K09Rik
95.987	0.428402	0.572176	0.748724	0.454024	0.999974	1810026B05Rik
45.4007	0.683469	0.759292	0.900141	0.368045	0.999974	1810026J23Rik
29.9821	1.12878	1.06821	1.05671	0.290645	0.999974	1810030O07Rik
5.31264	-6.10387	2.61625	-2.33306	0.0196449	0.490958	1810032O08Rik
752.778	0.488298	0.215938	2.26129	0.0237413	0.540839	1810037I17Rik
53.4983	0.530169	0.694966	0.762871	0.44554	0.999974	1810041L15Rik
36.6706	0.129399	0.935561	0.138311	0.889994	0.999974	1810043G02Rik
369.752	0.397256	0.288184	1.37848	0.168056	0.992829	1810043H04Rik
13.2568	4.01805	1.56644	2.56508	0.0103152	0.349419	1810055G02Rik
100.387	-0.369918	0.576394	-0.64178	0.521016	0.999974	1810058I24Rik
134.271	-0.223354	0.512704	-0.43564	0.663098	0.999974	2010012O05Rik
1739.95	0.190687	0.152321	1.25188	0.210615	0.999974	2010107E04Rik
22.0337	1.63646	1.16814	1.4009	0.161243	0.986049	2010107G23Rik
24.8287	0.216375	0.955181	0.226527	0.820791	0.999974	2010111I01Rik
167.739	0.992025	0.497056	1.9958	0.0459557	0.682407	2010204K13Rik
296.434	0.119917	0.32793	0.365678	0.714606	0.999974	2010300C02Rik
41.2929	0.164645	0.801032	0.205541	0.83715	0.999974	2010315B03Rik
33.742	0.171469	0.984414	0.174183	0.861721	0.999974	2010320M18Rik
183.783	-0.02098	0.408834	-0.0513168	0.959073	0.999974	2210013O21Rik
85.4148	1.04162	0.594347	1.75255	0.0796791	0.803826	2210015D19Rik
37.5946	1.30564	0.90891	1.43649	0.150864	0.973552	2210016F16Rik
621.938	-0.0143482	0.243119	-0.0590171	0.952938	0.999974	2210016L21Rik
67.2196	-0.823684	0.709884	-1.16031	0.245923	0.999974	2210018M11Rik
23.4896	2.14777	1.11237	1.9308	0.0535082	0.708682	2210404O09Rik
8.57176	-2.20795	1.60828	-1.37286	0.169795	0.994574	2210406O10Rik
40.0372	-0.0585867	1.07802	-0.0543467	0.956659	0.999974	2210408F21Rik
48.0009	0.650582	0.695674	0.935181	0.349695	0.999974	2210408I21Rik
60.8769	0.52618	0.775105	0.67885	0.497233	0.999974	2300009A05Rik
6.03719	-0.293626	2.74204	-0.107083	0.914723	0.999974	2310002F09Rik
151.348	0.125239	0.4552	0.27513	0.783217	0.999974	2310009A05Rik
78.5094	0.349443	0.638966	0.546888	0.584456	0.999974	2310009B15Rik
24.8513	0.97347	1.12381	0.866226	0.386366	0.999974	2310010J17Rik
42.1573	0.44	0.796167	0.552649	0.580504	0.999974	2310011J03Rik
5.61408	0.0784044	2.37282	0.0330428	0.97364	0.999974	2310015A10Rik
5.79675	4.45722	2.68678	1.65895	0.0971268	0.859234	2310022A10Rik
69.328	0.710166	0.627403	1.13191	0.257671	0.999974	2310022B05Rik
10.9776	1.43253	2.33744	0.612864	0.539966	0.999974	2310030G06Rik
83.2609	-0.22487	0.606604	-0.370704	0.710858	0.999974	2310033P09Rik
140.611	-0.116597	0.494537	-0.23577	0.813611	0.999974	2310035C23Rik
129.479	0.184246	0.497923	0.370029	0.711361	0.999974	2310036O22Rik
68.1616	0.487742	0.624762	0.780683	0.434989	0.999974	2310039H08Rik
5.85885	-3.25605	2.50049	-1.30217	0.19286	0.999974	2310040G24Rik
96.606	1.22634	0.649121	1.88923	0.0588611	0.73093	2310045N01Rik
5.50738	3.3146	2.22138	1.49213	0.135664	0.948548	2310047M10Rik
67.384	-0.477862	0.612071	-0.78073	0.434961	0.999974	2310057M21Rik
44.9051	1.27277	0.92361	1.37803	0.168193	0.992829	2310061I04Rik
28.6806	-1.08873	1.16326	-0.935935	0.349306	0.999974	2310067B10Rik
5.69081	0.53702	2.26145	0.237467	0.812295	0.999974	2310069G16Rik
51.3719	0.160253	0.752647	0.21292	0.83139	0.999974	2410002F23Rik
99.5897	-0.13512	0.572991	-0.235816	0.813576	0.999974	2410004B18Rik
14.7311	-0.72011	1.50245	-0.47929	0.631732	0.999974	2410004I01Rik
193.804	0.647194	0.37657	1.71865	0.0856777	0.824742	2410006H16Rik
552.661	0.417754	0.22478	1.8585	0.0630981	0.751898	2410015M20Rik
192.494	-0.585222	0.41506	-1.40997	0.158549	0.98183	2410089E03Rik
11.2213	0.13744	1.42579	0.0963959	0.923206	0.999974	2410127L17Rik
19.7481	0.769774	1.07715	0.714643	0.47483	0.999974	2410131K14Rik
36.2837	-0.095448	0.805943	-0.11843	0.905727	0.999974	2500004C02Rik
74.7015	0.419369	0.580551	0.722364	0.470071	0.999974	2510002D24Rik
60.5456	-0.153456	0.668988	-0.229385	0.81857	0.999974	2510009E07Rik
26.0271	-0.871446	0.971687	-0.896838	0.369805	0.999974	2510039O18Rik
31.1117	-0.109955	0.909665	-0.120874	0.903791	0.999974	2610001J05Rik
90.028	0.348923	0.546362	0.63863	0.523064	0.999974	2610002M06Rik
45.3756	1.1468	0.804219	1.42599	0.153873	0.97894	2610008E11Rik
22.6249	-0.249543	1.19228	-0.209299	0.834215	0.999974	2610015P09Rik
5.14179	-0.293649	2.35245	-0.124827	0.900661	0.999974	2610020C07Rik
26.7973	-0.6912	1.24732	-0.554147	0.579478	0.999974	2610035D17Rik
29.3887	-0.0462387	0.958246	-0.0482535	0.961514	0.999974	2610044O15Rik8
40.6498	0.0460657	0.788802	0.0583995	0.95343	0.999974	2610100L16Rik
150.962	0.404265	0.400715	1.00886	0.313042	0.999974	2610301B20Rik
23.9228	1.14314	1.13042	1.01125	0.311895	0.999974	2610306M01Rik
9.98245	-0.73264	1.93834	-0.377973	0.705451	0.999974	2610316D01Rik
215.39	-0.0834246	0.360304	-0.23154	0.816896	0.999974	2610507B11Rik
75.655	-0.728109	0.642443	-1.13334	0.25707	0.999974	2610507I01Rik
114.31	0.353562	0.543057	0.651058	0.515009	0.999974	2610524H06Rik
257.644	0.00969056	0.349324	0.0277409	0.977869	0.999974	2700029M09Rik
7.54121	0.741717	2.57224	0.288354	0.773076	0.999974	2700046G09Rik
25.2974	-0.622113	1.26095	-0.493367	0.621753	0.999974	2700049A03Rik
284.028	0.510511	0.319416	1.59826	0.109984	0.894903	2700060E02Rik
48.7352	1.73287	0.805888	2.15026	0.0315344	0.595118	2700062C07Rik
15.2257	-1.07707	1.53497	-0.701687	0.482874	0.999974	2700081O15Rik
136.542	-0.0539799	0.591405	-0.091274	0.927275	0.999974	2700094K13Rik
9.92282	0.2677	1.505	0.177874	0.858822	0.999974	2700097O09Rik
66.4584	0.736721	0.621634	1.18514	0.235964	0.999974	2810001G20Rik
8.66986	2.91137	1.8206	1.59913	0.109792	0.894903	2810002D19Rik
202.438	0.254596	0.407623	0.624587	0.532242	0.999974	2810004N23Rik
94.2015	-0.311384	0.499353	-0.623575	0.532907	0.999974	2810006K23Rik
95.9323	0.633214	0.582622	1.08683	0.27711	0.999974	2810013P06Rik
16.3733	-2.25322	1.42613	-1.57995	0.114118	0.90428	2810021J22Rik
40.8095	0.861374	0.822502	1.04726	0.29498	0.999974	2810025M15Rik
5.18109	-0.927282	2.8673	-0.323399	0.746393	0.999974	2810029C07Rik
57.7085	-0.269188	0.644325	-0.417783	0.676106	0.999974	2810403A07Rik
17.0784	1.1007	1.19618	0.920182	0.357477	0.999974	2810403D21Rik
399.745	0.379665	0.298695	1.27108	0.2037	0.999974	2810428I15Rik
5.23762	0.0698309	1.98838	0.0351195	0.971984	0.999974	2810454H06Rik
29.9593	0.552342	1.05991	0.52112	0.602283	0.999974	2810459M11Rik
42.4669	-0.299153	0.81279	-0.368056	0.712831	0.999974	2810468N07Rik
97.9234	-0.888921	0.594744	-1.49463	0.135012	0.948548	2810474O19Rik
16.2284	4.9014	1.6043	3.05516	0.00224939	0.139229	2900008C10Rik
8.16184	-1.67383	1.68968	-0.99062	0.321871	0.999974	2900009J06Rik
472.991	-0.0429504	0.260762	-0.164711	0.869172	0.999974	2900011O08Rik
70.0581	-0.431066	0.722599	-0.59655	0.550808	0.999974	2900026A02Rik
101.341	-0.248647	0.532745	-0.466728	0.640694	0.999974	2900052N01Rik
136.373	-0.784723	0.636689	-1.23251	0.21776	0.999974	2900055J20Rik
11.4054	-0.570323	1.45876	-0.390964	0.695824	0.999974	2900060B14Rik
35.9267	-0.28669	1.01414	-0.282693	0.777412	0.999974	2900076A07Rik
15.9286	-1.02243	1.41502	-0.722553	0.469955	0.999974	2900079G21Rik
142.457	-1.68445	0.45751	-3.68177	0.000231621	0.0268635	2900092D14Rik
197.542	-0.0472067	0.363357	-0.129918	0.896631	0.999974	2900097C17Rik
43.5822	1.41044	0.797801	1.76791	0.0770764	0.796845	3010026O09Rik
49.521	-0.224692	0.701552	-0.320278	0.748758	0.999974	3110002H16Rik
17.6443	-0.017423	1.2026	-0.0144877	0.988441	0.999974	3110009E18Rik
6.55718	0.613858	2.68446	0.228671	0.819125	0.999974	3110021N24Rik
305.343	-0.0341763	0.309499	-0.110425	0.912073	0.999974	3110035E14Rik
45.1493	0.53147	0.746636	0.711819	0.476577	0.999974	3110039I08Rik
36.6114	1.69296	0.979486	1.72842	0.0839134	0.81831	3110039M20Rik
53.964	-0.0192661	0.722474	-0.0266669	0.978725	0.999974	3110040N11Rik
48.3073	-0.662012	0.704845	-0.939231	0.347612	0.999974	3110043O21Rik
23.5296	1.72134	1.1933	1.4425	0.149163	0.970014	3110045C21Rik
25.2003	0.352067	1.00351	0.350834	0.725713	0.999974	3110052M02Rik
15.8196	-1.14637	1.63624	-0.70061	0.483546	0.999974	3110056K07Rik
7.87027	-0.507108	1.80173	-0.281456	0.778361	0.999974	3110057O12Rik
7.30955	-0.157103	1.78759	-0.0878858	0.929967	0.999974	3110062M04Rik
5.39751	-0.992254	2.47287	-0.401257	0.688231	0.999974	3110070M22Rik
46.1625	0.313769	0.749439	0.418672	0.675456	0.999974	3110082I17Rik
9.18952	2.6167	2.2747	1.15035	0.25	0.999974	3110082J24Rik
42.4735	0.620564	0.81956	0.757192	0.448935	0.999974	3632451O06Rik
16.0201	-0.401492	1.33892	-0.299864	0.764281	0.999974	3632454L22Rik
68.6071	0.371827	0.609171	0.610382	0.541609	0.999974	3830406C13Rik
12.1511	-0.444278	1.84149	-0.241261	0.809353	0.999974	4430402I18Rik
21.6489	2.14192	1.26216	1.69703	0.0896909	0.834093	4632404H12Rik
106.28	0.23487	0.530607	0.442643	0.658024	0.999974	4632415L05Rik
21.1824	0.104917	1.06306	0.0986936	0.921382	0.999974	4632428N05Rik
56.8525	-0.153579	0.640723	-0.239697	0.810565	0.999974	4732471J01Rik
16.1665	0.653102	1.57652	0.414268	0.678678	0.999974	4732491K20Rik
31.9841	0.891025	0.962723	0.925526	0.354692	0.999974	4831440E17Rik
76.6371	-0.0206901	0.779783	-0.0265331	0.978832	0.999974	4833420G17Rik
7.34717	-4.02368	1.97647	-2.03579	0.0417713	0.665334	4833422C13Rik
194.127	0.0881231	0.368211	0.239328	0.810851	0.999974	4833439L19Rik
14.0981	0.192154	1.64211	0.117016	0.906847	0.999974	4921504A21Rik
132.445	0.00996267	0.498168	0.0199986	0.984044	0.999974	4921524J17Rik
13.94	-0.609101	1.44332	-0.422013	0.673016	0.999974	4921531C22Rik
58.3067	-0.57997	0.629958	-0.92065	0.357233	0.999974	4930402H24Rik
4.64563	-3.2724	2.55524	-1.28066	0.200312	0.999974	4930429B21Rik
196.248	-0.0487559	0.375406	-0.129875	0.896665	0.999974	4930430F08Rik
26.3192	-0.822508	1.27896	-0.643105	0.520156	0.999974	4930447C04Rik
42.7037	0.458349	0.918684	0.498919	0.617837	0.999974	4930447M23Rik
15.8122	0.762542	1.8018	0.423212	0.672141	0.999974	4930452B06Rik
29.3116	1.44352	0.92827	1.55506	0.119932	0.912552	4930453N24Rik
6.17577	-5.3092	2.35585	-2.25363	0.0242197	0.540839	4930469G21Rik
12.3452	4.56706	1.76351	2.58975	0.00960454	0.334507	4930481A15Rik
13.5804	0.778813	1.87332	0.41574	0.6776	0.999974	4930503L19Rik
5.78534	-0.196005	2.498	-0.0784647	0.937458	0.999974	4930525G20Rik
20.2335	2.86901	1.30095	2.20531	0.0274322	0.566964	4930526I15Rik
26.8262	-0.431829	0.963954	-0.447976	0.65417	0.999974	4930570G19Rik
5.22479	2.19699	2.90479	0.756333	0.44945	0.999974	4930579G24Rik
12.0783	0.720014	1.98344	0.363012	0.716596	0.999974	4930579K19Rik
24.5095	0.138011	1.00253	0.137662	0.890507	0.999974	4931406C07Rik
84.1666	-0.869718	0.574414	-1.51409	0.130002	0.938541	4931406P16Rik
4.91788	0.681428	2.93585	0.232106	0.816456	0.999974	4931414P19Rik
19.435	-0.873299	3.51271	-0.248611	0.803662	0.999974	4932416H05Rik
473.837	0.342319	0.248472	1.3777	0.168297	0.992829	4932438A13Rik
29.498	-1.57486	1.26522	-1.24473	0.213232	0.999974	4932438H23Rik
7.23783	1.67988	1.86436	0.901048	0.367563	0.999974	4933404O12Rik
5.2827	5.7914	2.92001	1.98335	0.0473282	0.684437	4933406I18Rik
4.91371	-4.97237	2.5734	-1.93222	0.0533324	0.708682	4933408J17Rik
12.3744	0.410151	1.64497	0.249337	0.8031	0.999974	4933412E12Rik
11.0516	1.16637	1.7355	0.672067	0.501541	0.999974	4933412O06Rik
26.6821	0.248963	1.08797	0.228833	0.818999	0.999974	4933421O10Rik
59.6198	-0.147045	0.701426	-0.209637	0.833951	0.999974	4933427D14Rik
37.5297	1.37292	0.880273	1.55965	0.118843	0.91092	4933431E20Rik
463.264	0.350247	0.309933	1.13007	0.258445	0.999974	4933434E20Rik
63.1313	0.0597351	0.802667	0.0744208	0.940676	0.999974	5031426D15Rik
36.7728	-0.0699517	0.866671	-0.0807131	0.93567	0.999974	5031439G07Rik
43.4822	-1.15872	0.800625	-1.44727	0.147822	0.966087	5330417C22Rik
10.1192	0.659265	1.83379	0.359509	0.719214	0.999974	5330426P16Rik
39.3465	-0.846421	0.950984	-0.890047	0.373441	0.999974	5330434G04Rik
5.19539	-2.37156	2.45735	-0.965088	0.334501	0.999974	5430402O13Rik
58.9789	-0.0309598	0.644403	-0.0480442	0.961681	0.999974	5430405H02Rik
39.5271	0.0893637	0.775719	0.115201	0.908286	0.999974	5430416N02Rik
7.21663	1.43163	1.82214	0.785684	0.432053	0.999974	5430416O09Rik
10.9053	0.0164475	1.41872	0.0115932	0.99075	0.999974	5530601H04Rik
17.5761	-0.0348465	1.34439	-0.02592	0.979321	0.999974	5730408K05Rik
40.4766	-1.31034	0.824482	-1.58929	0.111994	0.898082	5730409E04Rik
289.654	-0.283462	0.331165	-0.855954	0.392023	0.999974	5730455P16Rik
12.67	0.884197	1.7055	0.518437	0.604153	0.999974	5730508B09Rik
23.0536	-1.60308	1.09968	-1.45777	0.144903	0.962358	5730522E02Rik
25.8842	0.791472	0.960306	0.824187	0.409833	0.999974	5830417I10Rik
7.96802	-1.39526	1.97714	-0.705696	0.480377	0.999974	5830454E08Rik
17.9194	0.249092	1.40048	0.177862	0.858832	0.999974	5930403L14Rik
19.226	1.20193	1.32505	0.907082	0.364363	0.999974	5930430L01Rik
7.46422	-1.90665	2.16653	-0.880049	0.378833	0.999974	6030408B16Rik
29.9509	-0.457944	0.900865	-0.508338	0.611216	0.999974	6030419C18Rik
50.7239	-0.237945	0.807956	-0.294502	0.768374	0.999974	6030458C11Rik
146.645	0.199622	0.411223	0.485434	0.627368	0.999974	6330403A02Rik
381.948	0.307545	0.289399	1.0627	0.287917	0.999974	6330403K07Rik
17.3278	0.917223	1.7224	0.532526	0.594362	0.999974	6330415B21Rik
5.09413	-0.150953	2.60411	-0.0579673	0.953775	0.999974	6330415G19Rik
6.36339	-1.17874	2.4614	-0.478892	0.632016	0.999974	6330416G13Rik
6.61094	-0.00120073	2.05254	-0.000584998	0.999533	0.999974	6330418K02Rik
5.98557	-1.02791	2.13394	-0.481694	0.630023	0.999974	6430411K18Rik
166.569	-0.416544	0.403252	-1.03296	0.301622	0.999974	6430548M08Rik
34.3248	0.22776	0.838938	0.271486	0.786017	0.999974	6430573F11Rik
13.7355	-1.85322	1.50984	-1.22743	0.219661	0.999974	6530402F18Rik
20.7375	-0.183463	1.05892	-0.173256	0.862451	0.999974	6530403H02Rik
10.7994	-0.845334	1.69942	-0.497424	0.61889	0.999974	6820408C15Rik
11.4381	0.29299	1.51184	0.193797	0.846335	0.999974	6820431F20Rik
17.3691	-1.67292	1.21113	-1.38129	0.16719	0.991062	8030462N17Rik
84.5777	-0.0914109	0.64177	-0.142436	0.886736	0.999974	8430419L09Rik
42.8222	-0.128086	0.859033	-0.149105	0.881471	0.999974	8430429K09Rik
5.04381	-2.19393	2.86155	-0.766694	0.443264	0.999974	8430431K14Rik
78.5892	0.309336	0.553023	0.559355	0.57592	0.999974	9030624J02Rik
6.64344	-1.9681	2.62762	-0.749006	0.453854	0.999974	9130019O22Rik
12.5802	1.55841	1.68722	0.923659	0.355664	0.999974	9130023H24Rik
34.06	-1.08503	0.885454	-1.22539	0.220427	0.999974	9130024F11Rik
88.8267	0.74575	0.581919	1.28153	0.200006	0.999974	9130401M01Rik
23.1702	0.276776	1.00167	0.276314	0.782307	0.999974	9230110C19Rik
40.4765	-1.04338	0.833566	-1.25171	0.210677	0.999974	9230114K14Rik
13.1262	0.0986721	1.96696	0.0501647	0.959991	0.999974	9330020H09Rik
8.79198	-0.981552	1.73828	-0.564669	0.572299	0.999974	9330102E08Rik
27.9085	1.52111	1.09782	1.38558	0.165876	0.991062	9330133O14Rik
18.6025	-0.16408	1.2183	-0.134679	0.892865	0.999974	9330151L19Rik
250.813	-0.631427	0.332592	-1.8985	0.0576301	0.723161	9330159F19Rik
7.22142	1.55182	2.09994	0.738982	0.459918	0.999974	9330162012Rik
10.1344	3.18735	2.22709	1.43117	0.152381	0.975549	9330179D12Rik
32.2436	0.591197	0.83963	0.704115	0.481361	0.999974	9330182L06Rik
10.6339	0.612894	1.49572	0.409765	0.681978	0.999974	9430015G10Rik
43.9839	0.950092	0.746847	1.27214	0.203324	0.999974	9430016H08Rik
73.0862	-0.0526504	0.614428	-0.0856902	0.931713	0.999974	9430020K01Rik
25.5043	0.609946	1.37608	0.443247	0.657587	0.999974	9430038I01Rik
14.1557	0.379425	1.56852	0.2419	0.808858	0.999974	9430065F17Rik
14.7125	2.25687	1.49478	1.50983	0.131086	0.940989	9430083A17Rik
27.8469	-0.570411	1.26204	-0.451974	0.651287	0.999974	9530059O14Rik
61.7342	0.656291	0.74775	0.877687	0.380113	0.999974	9530068E07Rik
19.1744	0.929763	1.19492	0.778097	0.436512	0.999974	9530077C05Rik
10.6859	-2.27227	2.11417	-1.07478	0.282473	0.999974	9530080O11Rik
18.6284	-0.843388	1.13936	-0.740231	0.45916	0.999974	9530091C08Rik
16.1235	-1.58718	1.35178	-1.17414	0.240338	0.999974	9630013A20Rik
15.4746	-0.100171	1.54454	-0.064855	0.948289	0.999974	9830147E19Rik
13.4333	1.4445	4.18579	0.345096	0.730023	0.999974	9830166K06Rik
178.191	0.0746817	0.405702	0.18408	0.85395	0.999974	9930021J03Rik
33.2596	-1.35065	0.883012	-1.52959	0.126117	0.930334	A130010J15Rik
4.90004	-1.20431	2.90561	-0.414477	0.678525	0.999974	A230001M10Rik
10.3012	-2.20913	1.96047	-1.12684	0.259809	0.999974	A230009B12Rik
101.575	-0.637736	0.517287	-1.23285	0.217633	0.999974	A230046K03Rik
17.8478	-0.388515	1.11838	-0.34739	0.728298	0.999974	A230050P20Rik
8.63122	-1.85508	2.23509	-0.829979	0.406551	0.999974	A230056J06Rik
26.5706	1.39371	1.11822	1.24637	0.21263	0.999974	A230057D06Rik
17.0108	0.610004	1.50824	0.404447	0.685884	0.999974	A230065H16Rik
40.4775	-0.832188	0.96431	-0.862988	0.388144	0.999974	A230070E04Rik
22.4406	0.467213	1.32557	0.352463	0.724491	0.999974	A230072C01Rik
5.74786	0.794145	2.53038	0.313845	0.753639	0.999974	A230072E10Rik
5.9578	0.82811	2.49447	0.331979	0.739905	0.999974	A230077H06Rik
7.69736	1.67655	1.91879	0.873752	0.382253	0.999974	A2m
10.3567	0.832094	1.77977	0.467529	0.640122	0.999974	A330009N23Rik
20.4278	-3.41565	1.1329	-3.01495	0.00257019	0.151249	A330023F24Rik
8.26243	4.9792	2.47349	2.01303	0.0441119	0.677328	A330041J22Rik
18.0199	-1.05748	1.45342	-0.727582	0.46687	0.999974	A330048O09Rik
76.6167	-0.927086	0.713158	-1.29997	0.19361	0.999974	A330050F15Rik
39.4055	0.290281	0.789038	0.367892	0.712953	0.999974	A330069E16Rik
15.0234	0.284318	1.47458	0.192813	0.847105	0.999974	A330070K13Rik
5.2103	2.05812	2.4542	0.838613	0.401687	0.999974	A330076C08Rik
89.9799	-0.126681	0.631784	-0.200513	0.841079	0.999974	A330076H08Rik
20.1723	-1.27156	1.4047	-0.905216	0.365351	0.999974	A330102I10Rik
188.044	0.124632	0.387991	0.321223	0.748041	0.999974	A430005L14Rik
16.1576	1.26872	1.61372	0.78621	0.431744	0.999974	A430033K04Rik
23.127	-1.22774	1.51769	-0.808953	0.418542	0.999974	A430035B10Rik
8.55215	4.98618	2.52105	1.97782	0.0479495	0.686817	A430046D13Rik
7.51739	-0.322827	1.98354	-0.162753	0.870713	0.999974	A430105I19Rik
6.2346	0.670379	2.50924	0.267164	0.789343	0.999974	A530013C23Rik
17.2725	1.66384	1.31943	1.26104	0.207296	0.999974	A530058N18Rik
6.2426	3.45612	2.19461	1.57482	0.115298	0.905058	A630072M18Rik
14.0001	0.209496	1.65774	0.126374	0.899436	0.999974	A630089N07Rik
145.821	0.494784	0.442578	1.11796	0.263585	0.999974	A730017C20Rik
7.67201	0.519341	1.93406	0.268524	0.788296	0.999974	A730017L22Rik
15.8209	-1.23507	1.29831	-0.951284	0.34146	0.999974	A730020E08Rik
14.6732	-2.51147	1.33302	-1.88404	0.0595594	0.736539	A730056A06Rik
359.421	0.0750197	0.279914	0.268009	0.788692	0.999974	A830010M20Rik
201.953	-0.0673075	0.458777	-0.146711	0.88336	0.999974	A830018L16Rik
58.7981	1.30532	0.703906	1.85439	0.0636828	0.751898	A830080D01Rik
20.5892	0.802177	1.28468	0.624415	0.532355	0.999974	A830082K12Rik
52.625	-0.481866	0.876567	-0.549719	0.582512	0.999974	A830082N09Rik
108.02	0.124991	0.550524	0.227041	0.820392	0.999974	A930005H10Rik
9.94844	0.754941	2.0891	0.361372	0.717822	0.999974	A930006K02Rik
8.19996	-2.0914	2.14985	-0.972811	0.330647	0.999974	A930013F10Rik
16.8329	1.33275	1.26448	1.054	0.291885	0.999974	A930017M01Rik
10.1113	-1.0475	2.01041	-0.521036	0.602341	0.999974	AA387883
21.3499	0.284548	1.14359	0.24882	0.8035	0.999974	AA388235
11.4229	1.02725	1.68228	0.610632	0.541443	0.999974	AA414768
11.3057	1.50006	1.82291	0.822893	0.410569	0.999974	AA415398
15.2541	1.30051	1.57859	0.823839	0.410031	0.999974	Aaas
18.0216	-0.986965	1.14358	-0.863045	0.388113	0.999974	Aacs
101.914	-0.111802	0.5701	-0.196109	0.844525	0.999974	Aagab
410.569	-0.150544	0.280824	-0.53608	0.591903	0.999974	Aak1
221.19	-0.619248	0.374671	-1.65278	0.0983764	0.86534	Aamdc
277.284	0.156211	0.323881	0.48231	0.629586	0.999974	Aamp
39.1127	1.22452	1.03614	1.18181	0.237283	0.999974	Aar2
18.3547	-0.0253412	1.18987	-0.0212974	0.983008	0.999974	Aard
174.067	0.400895	0.379215	1.05717	0.290434	0.999974	Aars
12.9859	-0.575384	1.48243	-0.388137	0.697915	0.999974	Aars2
103.814	0.130649	0.521125	0.250706	0.802041	0.999974	Aarsd1
162.391	0.110241	0.45111	0.244377	0.806939	0.999974	Aasdhppt
5.09456	-2.43056	2.26339	-1.07386	0.282887	0.999974	Aass
13.186	0.728856	1.38458	0.526409	0.598604	0.999974	Aatf
33.7165	-0.160204	0.884325	-0.18116	0.856242	0.999974	Aatk
361.582	-0.583249	0.334172	-1.74535	0.0809234	0.807334	Abat
71.7922	0.975636	0.629179	1.55065	0.120986	0.917065	Abca1
126.693	-0.207244	0.436853	-0.474402	0.635213	0.999974	Abca2
65.2578	0.716199	0.664326	1.07808	0.280996	0.999974	Abca3
208.566	-0.12859	0.495512	-0.259509	0.795242	0.999974	Abca5
11.4279	4.37146	2.10038	2.08127	0.037409	0.637501	Abca7
15.9479	1.02019	1.326	0.769375	0.441671	0.999974	Abca8a
22.168	0.936435	1.16057	0.806876	0.419738	0.999974	Abca8b
20.3543	0.617514	1.13728	0.542973	0.587149	0.999974	Abca9
24.6816	0.273071	1.01575	0.268837	0.788055	0.999974	Abcb10
20.1068	-1.4142	1.18102	-1.19744	0.231135	0.999974	Abcb1a
22.4613	0.959076	1.03492	0.926718	0.354073	0.999974	Abcb1b
28.1958	2.32003	1.02867	2.25538	0.0241093	0.540839	Abcb4
14.9078	1.05848	1.53263	0.690634	0.489796	0.999974	Abcb6
64.38	-0.054706	0.616094	-0.0887949	0.929245	0.999974	Abcb7
36.4953	0.202101	0.823906	0.245296	0.806228	0.999974	Abcb8
17.6321	1.21466	1.40693	0.86334	0.38795	0.999974	Abcb9
19.9982	2.69186	1.19482	2.25295	0.0242624	0.540839	Abcc1
11.7972	0.770658	2.07981	0.370543	0.710978	0.999974	Abcc3
7.18883	0.0547638	2.39441	0.0228715	0.981753	0.999974	Abcc4
149.238	-0.886111	0.480822	-1.84291	0.0653426	0.75841	Abcc5
14.6925	-1.93161	1.37166	-1.40822	0.159065	0.982632	Abcc8
9.2076	-0.429409	2.17199	-0.197702	0.843278	0.999974	Abcd1
102.927	-0.178296	0.502207	-0.355024	0.722571	0.999974	Abcd2
142.665	-0.25053	0.454677	-0.551007	0.581629	0.999974	Abcd3
7.64086	-0.29157	2.02995	-0.143634	0.885789	0.999974	Abcd4
248.949	-0.141826	0.423984	-0.334507	0.737997	0.999974	Abce1
164.932	-0.189938	0.383244	-0.495607	0.620172	0.999974	Abcf1
109.944	0.538849	0.478168	1.1269	0.259784	0.999974	Abcf2
78.3145	-0.571293	0.62162	-0.919039	0.358075	0.999974	Abcf3
118.864	0.0855378	0.495269	0.17271	0.862879	0.999974	Abcg1
49.4306	1.06297	0.83704	1.26992	0.204115	0.999974	Abcg2
10.6595	-0.701305	1.7664	-0.397025	0.691349	0.999974	Abcg4
71.5997	0.128498	0.574098	0.223827	0.822892	0.999974	Abhd10
31.4636	-0.19196	0.852397	-0.2252	0.821824	0.999974	Abhd11
409.768	0.442937	0.255688	1.73233	0.0832141	0.816701	Abhd12
74.0554	0.609111	0.580033	1.05013	0.293657	0.999974	Abhd13
74.3182	0.505217	0.660976	0.76435	0.444659	0.999974	Abhd14a
100.398	0.727011	0.494665	1.4697	0.141642	0.959921	Abhd16a
357.018	0.194782	0.286786	0.67919	0.497017	0.999974	Abhd17a
106.798	-0.505301	0.481251	-1.04997	0.293731	0.999974	Abhd17b
55.5644	-2.02215	0.748038	-2.70327	0.00686601	0.281163	Abhd17c
90.6951	0.520588	0.552948	0.941476	0.346461	0.999974	Abhd3
33.5993	0.168706	0.923826	0.182616	0.855099	0.999974	Abhd4
24.2489	-0.358897	1.03347	-0.347273	0.728386	0.999974	Abhd5
242	-0.550627	0.387574	-1.4207	0.155403	0.980253	Abhd6
121.331	0.744953	0.598848	1.24398	0.213508	0.999974	Abhd8
500.744	0.195071	0.231532	0.842523	0.399495	0.999974	Abi1
543.426	0.0933788	0.238321	0.39182	0.695191	0.999974	Abi2
11.8798	5.50586	2.03231	2.70916	0.00674539	0.279793	Abi3
24.173	-0.554583	1.17299	-0.472796	0.636359	0.999974	Abl1
148.814	0.301162	0.46102	0.653251	0.513594	0.999974	Abl2
83.6686	-0.935658	0.632961	-1.47823	0.139348	0.954489	Ablim1
33.8817	0.0225087	0.855017	0.0263255	0.978998	0.999974	Ablim2
18.4001	2.26402	1.1828	1.91412	0.0556049	0.719319	Ablim3
332.762	0.110642	0.296977	0.372562	0.709474	0.999974	Abr
110.584	-0.30155	0.486331	-0.620052	0.535224	0.999974	Abracl
46.5695	-0.0847662	0.721859	-0.117428	0.906521	0.999974	Abt1
9.43519	0.266525	1.68057	0.158592	0.87399	0.999974	Abtb1
10.6137	0.363148	1.81139	0.20048	0.841105	0.999974	Acaa1a
33.3815	-0.30273	0.929732	-0.32561	0.744719	0.999974	Acaa2
33.2983	0.660597	0.899666	0.73427	0.462784	0.999974	Acaca
29.0366	-0.132557	1.12146	-0.118201	0.905909	0.999974	Acad11
30.5461	0.632595	1.0523	0.601154	0.547737	0.999974	Acad8
46.321	-0.254588	0.753339	-0.337946	0.735404	0.999974	Acad9
65.4739	0.8241	0.723172	1.13956	0.254468	0.999974	Acadl
145.641	0.0271115	0.410123	0.0661057	0.947294	0.999974	Acadm
153.131	0.403886	0.461028	0.876054	0.381001	0.999974	Acadsb
41.3622	0.445975	0.866487	0.514694	0.606767	0.999974	Acadvl
265.608	-0.032292	0.360052	-0.0896869	0.928536	0.999974	Acap2
104.278	-0.223941	0.506859	-0.441821	0.658619	0.999974	Acap3
428.209	0.479603	0.268771	1.78443	0.0743541	0.787442	Acat1
33.49	0.472602	0.940765	0.502359	0.615415	0.999974	Acat2
6.86252	6.16807	2.38025	2.59135	0.00956003	0.33393	Acat3
143.171	0.341215	0.428581	0.796152	0.425944	0.999974	Acbd3
40.0125	-1.0379	0.792226	-1.3101	0.190161	0.999974	Acbd4
264.417	0.206291	0.30796	0.669863	0.502945	0.999974	Acbd5
121.568	-0.197906	0.486202	-0.407045	0.683975	0.999974	Acbd6
16.0028	1.25322	1.56859	0.798948	0.42432	0.999974	Acd
60.471	-0.473166	0.629615	-0.751516	0.452342	0.999974	Acer3
8.67937	0.000448869	2.2759	0.000197227	0.999843	0.999974	Ache
175.527	-0.135702	0.419261	-0.323669	0.746189	0.999974	Acin1
14.1324	0.675165	1.61457	0.41817	0.675823	0.999974	Ackr1
7.69657	1.90533	1.90312	1.00116	0.31675	0.999974	Ackr3
103.634	0.150945	0.559085	0.269986	0.787171	0.999974	Acly
59.379	1.30036	0.709597	1.83254	0.0668712	0.76043	Aco1
579.014	0.0924689	0.263759	0.350581	0.725903	0.999974	Aco2
18.7277	0.267867	1.27904	0.209429	0.834114	0.999974	Acot1
26.0437	-0.518718	1.27674	-0.406285	0.684533	0.999974	Acot11
931.323	0.089895	0.185684	0.48413	0.628294	0.999974	Acot13
77.057	-1.99651	0.655033	-3.04795	0.00230405	0.141877	Acot2
7.69004	-1.647	2.20673	-0.74635	0.455456	0.999974	Acot4
15.7584	0.584874	1.17646	0.497147	0.619086	0.999974	Acot5
410.831	-0.0912599	0.257223	-0.35479	0.722747	0.999974	Acot7
18.5656	0.756744	1.1218	0.674578	0.499944	0.999974	Acot8
49.5168	1.22649	0.714517	1.71653	0.0860647	0.82647	Acot9
[truncated: 11,447 more rows]

## Sheet: 5xFAD PML KO vs 5xFAD_females
baseMean	log2FoldChange	lfcSE	stat	pvalue	padj	GENE
[truncated: 11,918 more rows]

[truncated: 1 more sheets: 5xFAD PML KO vs 5xFAD_males]
