# Supplementary material for: Promyelocytic Leukemia Protein Promotes Neuroprotection in a mouse model of Alzheimer’s Disease by Modulating the Microglial Inflammatory Response
Source: Research Square preprint supplement (doi:10.21203/rs.3.rs-8584272/v1), 2026-01-20
Supplement: Supplementary file 2 [file 71bc3b51b18d1b48e63cf0af.xlsx]

## Sheet: discordant genes 5xFAD PML KO
up_male & down_female		up_female & down_male
Actb
AI593442
Alkbh5
Ap2a2
Arglu1
Birc6
Clasp2
Cldn11
Dpysl2
Dusp3
Eif4a1
Fam3c
Fam81a
Fry
Gpc1
Hnrnpl
Hsf2
Insig1
Iqsec1
Kdelr2
Klhl24
Lppr4
Magi1
Mtmr2
Ncam1
Nfia
Pam
Pdpn
Pitpnc1
Prkaca
Psd
R3hdm4
Rbm15
Repin1
Rfx3
Rps25
Rraga
Runx1t1
Sephs2
Sept10
Slitrk2
Sox9
Spock1
Supt16
Tacc1
Timmdc1
Tmem181a
Tmf1
Wtap
Ywhaz
